# Supplementary material for: Structure and Inter-Annual Variability of the Freshened Surface Layer in the Laptev and East-Siberian Seas During Ice-Free Periods
Source: Frontiers journal article supplement (doi:10.3389/fmars.2021.735011), 2021-12-10
Supplement: Table_2.XLSX [file Table_2.XLSX]

## Sheet: 2008
mon/day/yr	hh:mm	Lon (°E)	Lat (°N)	Tempera-ture [ITS-90, deg C]	Salinity [PSU]
2008-08-22 04:35:15	2008-08-22 04:35:15	117.002	77.5148	1.2587	28.3852
2008-08-22 04:43:14	2008-08-22 04:43:14	117.092	77.5087	1.1183	28.2595
2008-08-22 04:51:15	2008-08-22 04:51:15	117.175	77.5045	1.2135	27.1653
2008-08-22 04:59:14	2008-08-22 04:59:14	117.248	77.5071	1.0654	27.6077
2008-08-22 05:07:14	2008-08-22 05:07:14	117.297	77.5075	1.1721	26.6038
2008-08-22 05:15:15	2008-08-22 05:15:15	117.389	77.4939	0.9807	27.2138
2008-08-22 05:23:14	2008-08-22 05:23:14	117.488	77.4805	0.8168	27.7245
2008-08-22 05:31:15	2008-08-22 05:31:15	117.57	77.465	0.6768	28.0213
2008-08-22 05:39:14	2008-08-22 05:39:14	117.617	77.4572	0.556	27.9538
2008-08-22 05:47:15	2008-08-22 05:47:15	117.62	77.4473	0.6255	27.2892
2008-08-22 05:55:14	2008-08-22 05:55:14	117.707	77.4323	0.534	27.5763
2008-08-22 06:03:15	2008-08-22 06:03:15	117.748	77.4105	0.49	27.9095
2008-08-22 06:11:15	2008-08-22 06:11:15	117.738	77.3893	0.4993	28.1403
2008-08-22 06:19:14	2008-08-22 06:19:14	117.641	77.3784	0.5154	28.317
2008-08-22 06:27:15	2008-08-22 06:27:15	117.564	77.3604	0.5708	28.4823
2008-08-22 06:35:14	2008-08-22 06:35:14	117.559	77.3384	0.6657	28.654
2008-08-22 06:43:15	2008-08-22 06:43:15	117.633	77.321	0.7966	28.8209
2008-08-22 06:51:14	2008-08-22 06:51:14	117.649	77.307	0.9035	28.0712
2008-08-22 06:59:15	2008-08-22 06:59:15	117.659	77.284	1.0372	27.4562
2008-08-22 07:07:14	2008-08-22 07:07:14	117.664	77.2588	0.9944	27.8661
2008-08-22 07:15:15	2008-08-22 07:15:15	117.675	77.2334	0.9788	28.1623
2008-08-22 07:23:14	2008-08-22 07:23:14	117.707	77.2095	0.8762	28.304
2008-08-22 07:31:14	2008-08-22 07:31:14	117.773	77.1895	0.7555	28.3962
2008-08-22 07:39:15	2008-08-22 07:39:15	117.844	77.1705	0.6558	28.4743
2008-08-22 07:47:14	2008-08-22 07:47:14	117.918	77.152	0.5599	28.5395
2008-08-22 07:55:15	2008-08-22 07:55:15	117.992	77.1334	0.5009	28.5881
2008-08-22 08:03:14	2008-08-22 08:03:14	118.087	77.1211	0.4523	28.6404
2008-08-22 08:11:15	2008-08-22 08:11:15	118.183	77.1097	0.4055	28.7039
2008-08-22 08:19:14	2008-08-22 08:19:14	118.279	77.0981	0.3464	28.7712
2008-08-22 08:27:15	2008-08-22 08:27:15	118.355	77.0806	0.3115	28.8284
2008-08-22 08:35:14	2008-08-22 08:35:14	118.439	77.0647	0.2813	28.8473
2008-08-22 08:43:14	2008-08-22 08:43:14	118.513	77.0505	0.245	28.8419
2008-08-22 08:51:15	2008-08-22 08:51:15	118.563	77.0284	0.231	28.8521
2008-08-22 08:59:14	2008-08-22 08:59:14	118.61	77.006	0.2144	28.8748
2008-08-22 09:07:15	2008-08-22 09:07:15	118.643	76.982	0.186	28.9243
2008-08-22 09:15:14	2008-08-22 09:15:14	118.67	76.9579	0.1354	28.9865
2008-08-22 09:23:15	2008-08-22 09:23:15	118.614	76.9416	0.0792	29.0456
2008-08-22 09:31:14	2008-08-22 09:31:14	118.538	76.9278	0.0422	29.0437
2008-08-22 09:39:15	2008-08-22 09:39:15	118.445	76.916	0.029	29.075
2008-08-22 09:47:14	2008-08-22 09:47:14	118.346	76.9078	0.033	29.0748
2008-08-22 09:55:14	2008-08-22 09:55:14	118.252	76.8974	0.0407	29.0619
2008-08-22 10:03:15	2008-08-22 10:03:15	118.221	76.8766	0.0512	29.0579
2008-08-22 10:11:14	2008-08-22 10:11:14	118.238	76.8523	0.0586	29.0688
2008-08-22 10:19:15	2008-08-22 10:19:15	118.196	76.8319	0.0485	29.0964
2008-08-22 10:27:14	2008-08-22 10:27:14	118.131	76.8127	0.0273	29.1185
2008-08-22 10:35:15	2008-08-22 10:35:15	118.071	76.7928	0.0098	29.1631
2008-08-22 10:43:14	2008-08-22 10:43:14	118.018	76.772	0.0095	29.2199
2008-08-22 10:51:15	2008-08-22 10:51:15	117.929	76.7648	0.0237	29.2577
2008-08-22 10:59:14	2008-08-22 10:59:14	117.872	76.7576	0.0403	29.2558
2008-08-22 11:07:14	2008-08-22 11:07:14	117.848	76.7427	0.1455	28.7587
2008-08-22 11:15:15	2008-08-22 11:15:15	117.829	76.7331	0.4236	27.3142
2008-08-22 11:23:14	2008-08-22 11:23:14	117.812	76.7261	0.5726	26.2955
2008-08-22 11:31:15	2008-08-22 11:31:15	117.797	76.7123	0.5731	26.1693
2008-08-22 11:39:14	2008-08-22 11:39:14	117.817	76.7045	0.6055	25.7401
2008-08-22 11:47:15	2008-08-22 11:47:15	117.854	76.6866	0.5395	25.6466
2008-08-22 11:55:14	2008-08-22 11:55:14	117.888	76.6766	0.3973	26.3547
2008-08-22 12:03:15	2008-08-22 12:03:15	117.936	76.665	0.2954	26.7238
2008-08-22 12:11:15	2008-08-22 12:11:15	117.968	76.659	0.188	27.2996
2008-08-22 12:19:14	2008-08-22 12:19:14	117.99	76.6399	0.1299	27.8539
2008-08-22 12:27:15	2008-08-22 12:27:15	118.015	76.6242	0.1146	27.927
2008-08-22 12:35:14	2008-08-22 12:35:14	118.02	76.6175	0.0922	27.9422
2008-08-22 12:43:15	2008-08-22 12:43:15	117.988	76.6054	0.05	28.075
2008-08-22 12:51:14	2008-08-22 12:51:14	117.955	76.5884	0.0218	28.524
2008-08-22 12:59:15	2008-08-22 12:59:15	117.926	76.5706	0.0169	28.8514
2008-08-22 13:07:14	2008-08-22 13:07:14	117.93	76.5495	0.0221	29.1513
2008-08-22 13:15:15	2008-08-22 13:15:15	117.972	76.5324	0.0272	29.3796
2008-08-22 13:23:14	2008-08-22 13:23:14	118.039	76.5214	0.0251	29.5256
2008-08-22 13:31:14	2008-08-22 13:31:14	118.121	76.513	0.0055	29.6099
2008-08-22 13:39:15	2008-08-22 13:39:15	118.162	76.501	-0.004	29.6589
2008-08-22 13:47:14	2008-08-22 13:47:14	118.177	76.4871	0.0203	29.5924
2008-08-22 13:55:15	2008-08-22 13:55:15	118.235	76.4738	0.0213	29.6128
2008-08-22 14:03:14	2008-08-22 14:03:14	118.325	76.4686	0.0021	29.7005
2008-08-22 14:11:15	2008-08-22 14:11:15	118.283	76.4526	-0.0216	29.7518
2008-08-22 14:19:14	2008-08-22 14:19:14	118.303	76.4325	-0.0392	29.8036
2008-08-22 14:27:15	2008-08-22 14:27:15	118.327	76.4181	-0.0135	29.7163
2008-08-22 14:35:14	2008-08-22 14:35:14	118.352	76.407	-0.032	29.6319
2008-08-22 14:43:14	2008-08-22 14:43:14	118.378	76.3936	-0.0497	29.6818
2008-08-22 14:51:15	2008-08-22 14:51:15	118.414	76.3738	-0.0441	29.7546
2008-08-22 14:59:14	2008-08-22 14:59:14	118.454	76.3493	-0.0371	29.8119
2008-08-22 15:07:15	2008-08-22 15:07:15	118.505	76.3259	-0.0301	29.8273
2008-08-22 15:15:14	2008-08-22 15:15:14	118.552	76.3021	-0.0009	29.7811
2008-08-22 15:23:15	2008-08-22 15:23:15	118.598	76.2793	0.0085	29.721
2008-08-22 15:31:14	2008-08-22 15:31:14	118.644	76.2715	0.0042	29.6715
2008-08-22 15:39:15	2008-08-22 15:39:15	118.715	76.2622	-0.0122	29.608
2008-08-22 15:47:14	2008-08-22 15:47:14	118.793	76.2439	-0.0203	29.5746
2008-08-22 15:55:14	2008-08-22 15:55:14	118.842	76.2198	-0.0246	29.5487
2008-08-22 16:03:15	2008-08-22 16:03:15	118.902	76.2023	-0.0274	29.5325
2008-08-22 16:11:14	2008-08-22 16:11:14	118.95	76.1785	-0.0274	29.5219
2008-08-22 16:19:15	2008-08-22 16:19:15	118.979	76.1531	-0.0205	29.5202
2008-08-22 16:27:14	2008-08-22 16:27:14	118.98	76.1262	-0.0044	29.5172
2008-08-22 16:35:15	2008-08-22 16:35:15	119.01	76.1006	0.0012	29.5148
2008-08-22 16:43:14	2008-08-22 16:43:14	119.102	76.0874	0.0169	29.4824
2008-08-22 16:51:15	2008-08-22 16:51:15	119.196	76.0747	0.0217	29.4308
2008-08-22 16:59:14	2008-08-22 16:59:14	119.29	76.0622	0.0043	29.4679
2008-08-22 17:07:14	2008-08-22 17:07:14	119.373	76.0464	-0.0087	29.5
2008-08-22 17:15:15	2008-08-22 17:15:15	119.403	76.0216	0.037	29.4065
2008-08-22 17:23:14	2008-08-22 17:23:14	119.434	75.9966	0.0518	29.287
2008-08-22 17:31:15	2008-08-22 17:31:15	119.484	75.9736	0.0638	29.0798
2008-08-22 17:39:14	2008-08-22 17:39:14	119.537	75.9506	0.0668	28.8734
2008-08-22 17:47:15	2008-08-22 17:47:15	119.598	75.9287	0.0631	28.7124
2008-08-22 17:55:14	2008-08-22 17:55:14	119.651	75.9082	0.045	28.5895
2008-08-22 18:03:15	2008-08-22 18:03:15	119.693	75.8921	0.0127	28.6098
2008-08-22 18:11:15	2008-08-22 18:11:15	119.756	75.874	-0.0166	28.6909
2008-08-22 18:19:14	2008-08-22 18:19:14	119.846	75.8644	-0.0474	28.7392
2008-08-22 18:27:15	2008-08-22 18:27:15	119.883	75.8449	-0.059	28.7581
2008-08-22 18:35:14	2008-08-22 18:35:14	119.904	75.8253	-0.0565	28.767
2008-08-22 18:43:15	2008-08-22 18:43:15	119.908	75.8089	-0.0269	28.7167
2008-08-22 18:51:14	2008-08-22 18:51:14	119.903	75.7909	0.0003	28.4968
2008-08-22 18:59:15	2008-08-22 18:59:15	119.884	75.7696	0.0272	28.2118
2008-08-22 19:07:14	2008-08-22 19:07:14	119.847	75.7486	0.0523	27.9812
2008-08-22 19:15:15	2008-08-22 19:15:15	119.822	75.7312	0.0589	27.8261
2008-08-22 19:23:14	2008-08-22 19:23:14	119.78	75.7193	0.0349	27.7757
2008-08-22 19:31:14	2008-08-22 19:31:14	119.73	75.7131	0.0288	27.716
2008-08-22 19:39:15	2008-08-22 19:39:15	119.681	75.7055	0.0119	27.6933
2008-08-22 19:47:14	2008-08-22 19:47:14	119.624	75.7021	-0.008	27.6804
2008-08-22 19:55:15	2008-08-22 19:55:15	119.54	75.7032	-0.0205	27.6658
2008-08-22 20:03:14	2008-08-22 20:03:14	119.464	75.7046	-0.0232	27.6684
2008-08-22 20:11:15	2008-08-22 20:11:15	119.397	75.704	-0.0069	27.6753
2008-08-22 20:19:14	2008-08-22 20:19:14	119.34	75.7047	0.0302	27.659
2008-08-22 20:27:15	2008-08-22 20:27:15	119.277	75.6998	0.0667	27.5726
2008-08-22 20:35:14	2008-08-22 20:35:14	119.256	75.6845	0.0853	27.4726
2008-08-22 20:43:14	2008-08-22 20:43:14	119.247	75.6699	0.0954	27.3974
2008-08-22 20:51:15	2008-08-22 20:51:15	119.283	75.6531	0.101	27.3564
2008-08-22 20:59:14	2008-08-22 20:59:14	119.283	75.6343	0.1688	27.2925
2008-08-22 21:07:15	2008-08-22 21:07:15	119.252	75.6173	0.254	27.226
2008-08-22 21:15:14	2008-08-22 21:15:14	119.265	75.5967	0.3752	27.0971
2008-08-22 21:23:15	2008-08-22 21:23:15	119.239	75.577	0.445	27.0071
2008-08-22 21:31:14	2008-08-22 21:31:14	119.225	75.5578	0.4238	26.9919
2008-08-22 21:39:15	2008-08-22 21:39:15	119.212	75.5422	0.3998	26.9439
2008-08-22 21:47:14	2008-08-22 21:47:14	119.169	75.5238	0.449	26.8
2008-08-22 21:55:14	2008-08-22 21:55:14	119.168	75.4999	0.6878	26.3997
2008-08-22 22:03:15	2008-08-22 22:03:15	119.152	75.4759	1.0594	25.8372
2008-08-22 22:11:14	2008-08-22 22:11:14	119.128	75.4523	1.4031	25.341
2008-08-22 22:19:15	2008-08-22 22:19:15	119.102	75.4285	1.5897	25.0464
2008-08-22 22:27:14	2008-08-22 22:27:14	119.072	75.4046	1.6952	24.905
2008-08-22 22:35:15	2008-08-22 22:35:15	119.039	75.3819	1.7884	24.7389
2008-08-22 22:43:14	2008-08-22 22:43:14	118.999	75.3599	1.9047	24.5436
2008-08-22 22:51:15	2008-08-22 22:51:15	118.965	75.3376	1.976	24.2901
2008-08-22 22:59:14	2008-08-22 22:59:14	118.938	75.3145	2.1084	24.0062
2008-08-22 23:07:14	2008-08-22 23:07:14	118.907	75.2917	2.3301	23.7816
2008-08-22 23:15:15	2008-08-22 23:15:15	118.872	75.2695	2.5229	23.6284
2008-08-22 23:23:14	2008-08-22 23:23:14	118.836	75.2473	2.6812	23.5388
2008-08-22 23:31:15	2008-08-22 23:31:15	118.8	75.225	2.77	23.6338
2008-08-22 23:39:14	2008-08-22 23:39:14	118.842	75.2067	2.8346	23.6704
2008-08-22 23:47:15	2008-08-22 23:47:15	118.937	75.2037	2.88	23.6497
2008-08-22 23:55:14	2008-08-22 23:55:14	119.033	75.2043	2.9577	23.7033
2008-08-23 00:03:15	2008-08-23 00:03:15	119.129	75.2046	3.0524	23.7177
2008-08-23 00:11:15	2008-08-23 00:11:15	119.222	75.2	3.1693	23.6597
2008-08-23 00:19:14	2008-08-23 00:19:14	119.309	75.1906	3.3103	23.5796
2008-08-23 00:27:15	2008-08-23 00:27:15	119.386	75.1765	3.5042	23.4907
2008-08-23 00:35:14	2008-08-23 00:35:14	119.46	75.1612	3.6997	23.4003
2008-08-23 00:43:15	2008-08-23 00:43:15	119.528	75.1444	3.883	23.2966
2008-08-23 00:51:14	2008-08-23 00:51:14	119.604	75.1297	3.9481	23.19
2008-08-23 00:59:15	2008-08-23 00:59:15	119.691	75.1194	4.0077	23.106
2008-08-23 01:07:14	2008-08-23 01:07:14	119.787	75.1176	4.141	23.003
2008-08-23 01:15:15	2008-08-23 01:15:15	119.888	75.1185	4.3344	22.8596
2008-08-23 01:23:14	2008-08-23 01:23:14	119.99	75.1198	4.5609	22.6786
2008-08-23 01:31:14	2008-08-23 01:31:14	120.092	75.1216	4.7061	22.533
2008-08-23 01:39:15	2008-08-23 01:39:15	120.195	75.1233	4.8058	22.4086
2008-08-23 01:47:14	2008-08-23 01:47:14	120.298	75.1252	4.9073	22.2918
2008-08-23 01:55:15	2008-08-23 01:55:15	120.402	75.1272	4.9798	22.19
2008-08-23 02:03:14	2008-08-23 02:03:14	120.507	75.1294	5.0152	22.1127
2008-08-23 02:11:15	2008-08-23 02:11:15	120.611	75.1315	5.0349	22.0705
2008-08-23 02:19:14	2008-08-23 02:19:14	120.716	75.1338	5.0696	22.082
2008-08-23 02:27:15	2008-08-23 02:27:15	120.821	75.1359	5.0964	22.149
2008-08-23 02:35:14	2008-08-23 02:35:14	120.928	75.1381	5.0813	22.2551
2008-08-23 02:43:14	2008-08-23 02:43:14	121.034	75.1403	5.039	22.3691
2008-08-23 02:51:15	2008-08-23 02:51:15	121.139	75.1425	4.9922	22.5108
2008-08-23 02:59:14	2008-08-23 02:59:14	121.243	75.1449	4.9086	22.6604
2008-08-23 03:07:15	2008-08-23 03:07:15	121.348	75.1469	4.8611	22.718
2008-08-23 03:15:14	2008-08-23 03:15:14	121.453	75.1489	4.812	22.7484
2008-08-23 03:23:15	2008-08-23 03:23:15	121.557	75.1508	4.8035	22.6828
2008-08-23 03:31:14	2008-08-23 03:31:14	121.66	75.1524	4.8648	22.5309
2008-08-23 03:39:15	2008-08-23 03:39:15	121.758	75.1609	4.9604	22.3277
2008-08-23 03:47:14	2008-08-23 03:47:14	121.852	75.1708	5.0338	22.1438
2008-08-23 03:55:14	2008-08-23 03:55:14	121.947	75.1808	5.0992	21.9429
2008-08-23 04:03:15	2008-08-23 04:03:15	122.041	75.1908	5.1572	21.7411
2008-08-23 04:11:14	2008-08-23 04:11:14	122.135	75.2009	5.224	21.4735
2008-08-23 04:19:15	2008-08-23 04:19:15	122.228	75.2111	5.3118	21.118
2008-08-23 04:27:14	2008-08-23 04:27:14	122.32	75.2213	5.4078	20.7039
2008-08-23 04:35:15	2008-08-23 04:35:15	122.413	75.2317	5.5135	20.2523
2008-08-23 04:43:14	2008-08-23 04:43:14	122.506	75.242	5.6524	19.7854
2008-08-23 04:51:15	2008-08-23 04:51:15	122.599	75.252	5.7489	19.478
2008-08-23 04:59:14	2008-08-23 04:59:14	122.693	75.2619	5.8401	19.2051
2008-08-23 05:07:14	2008-08-23 05:07:14	122.786	75.2714	5.8884	19.0139
2008-08-23 05:15:15	2008-08-23 05:15:15	122.88	75.281	5.913	18.8754
2008-08-23 05:23:14	2008-08-23 05:23:14	122.973	75.2904	5.9202	18.7747
2008-08-23 05:31:15	2008-08-23 05:31:15	123.067	75.2997	5.9069	18.6997
2008-08-23 05:39:14	2008-08-23 05:39:14	123.161	75.3092	5.8734	18.663
2008-08-23 05:47:15	2008-08-23 05:47:15	123.254	75.3188	5.8298	18.733
2008-08-23 05:55:14	2008-08-23 05:55:14	123.346	75.3284	5.7856	18.8482
2008-08-23 06:03:15	2008-08-23 06:03:15	123.438	75.3379	5.7265	18.9556
2008-08-23 06:11:15	2008-08-23 06:11:15	123.528	75.3473	5.7115	18.9929
2008-08-23 06:19:14	2008-08-23 06:19:14	123.618	75.3565	5.7335	18.9963
2008-08-23 06:27:15	2008-08-23 06:27:15	123.708	75.3657	5.7332	18.9943
2008-08-23 06:35:14	2008-08-23 06:35:14	123.798	75.3749	5.7366	18.9851
2008-08-23 06:43:15	2008-08-23 06:43:15	123.889	75.384	5.7387	18.9632
2008-08-23 06:51:14	2008-08-23 06:51:14	123.98	75.3931	5.7388	18.9206
2008-08-23 06:59:15	2008-08-23 06:59:15	124.072	75.4023	5.731	18.8524
2008-08-23 07:07:14	2008-08-23 07:07:14	124.164	75.4116	5.7289	18.8176
2008-08-23 07:15:15	2008-08-23 07:15:15	124.256	75.4208	5.7571	18.7802
2008-08-23 07:23:14	2008-08-23 07:23:14	124.347	75.43	5.8003	18.7076
2008-08-23 07:31:14	2008-08-23 07:31:14	124.438	75.4399	5.8533	18.6084
2008-08-23 07:39:15	2008-08-23 07:39:15	124.528	75.4497	5.9011	18.4907
2008-08-23 07:47:14	2008-08-23 07:47:14	124.619	75.4596	5.9313	18.3772
2008-08-23 07:55:15	2008-08-23 07:55:15	124.695	75.473	5.9527	18.2859
2008-08-23 08:03:14	2008-08-23 08:03:14	124.789	75.4804	5.9631	18.1955
2008-08-23 08:11:15	2008-08-23 08:11:15	124.884	75.4879	5.9827	18.0986
2008-08-23 08:19:14	2008-08-23 08:19:14	124.977	75.4965	5.9991	18.0473
2008-08-23 08:27:15	2008-08-23 08:27:15	125.069	75.5054	6.033	18.0453
2008-08-23 08:35:14	2008-08-23 08:35:14	125.161	75.5143	6.0663	18.1021
2008-08-23 08:43:14	2008-08-23 08:43:14	125.253	75.5233	6.0764	18.2012
2008-08-23 08:51:15	2008-08-23 08:51:15	125.344	75.5324	6.0532	18.3512
2008-08-23 08:59:14	2008-08-23 08:59:14	125.435	75.5414	6.0709	18.3237
2008-08-23 09:07:15	2008-08-23 09:07:15	125.526	75.5503	6.1284	18.1273
2008-08-23 09:15:14	2008-08-23 09:15:14	125.616	75.5591	6.2591	16.6891
2008-08-23 09:23:15	2008-08-23 09:23:15	125.706	75.5681	6.3171	16.2299
2008-08-23 09:31:14	2008-08-23 09:31:14	125.795	75.5779	6.3759	15.9157
2008-08-23 09:39:15	2008-08-23 09:39:15	125.883	75.5877	6.4065	15.905
2008-08-23 09:47:14	2008-08-23 09:47:14	125.972	75.5975	6.4243	16.0804
2008-08-23 09:55:14	2008-08-23 09:55:14	126.061	75.6073	6.412	16.3707
2008-08-23 10:03:15	2008-08-23 10:03:15	126.151	75.6166	6.3781	16.6005
2008-08-23 10:11:14	2008-08-23 10:11:14	126.241	75.6258	6.3315	16.8367
2008-08-23 10:19:15	2008-08-23 10:19:15	126.332	75.635	6.2981	16.9928
2008-08-23 10:27:14	2008-08-23 10:27:14	126.422	75.6442	6.2758	17.1565
2008-08-23 10:35:15	2008-08-23 10:35:15	126.514	75.6533	6.2811	17.273
2008-08-23 10:43:14	2008-08-23 10:43:14	126.605	75.6625	6.2807	17.2983
2008-08-23 10:51:15	2008-08-23 10:51:15	126.698	75.6712	6.2805	17.2867
2008-08-23 10:59:14	2008-08-23 10:59:14	126.792	75.6799	6.2812	17.3246
2008-08-23 11:07:14	2008-08-23 11:07:14	126.886	75.6887	6.2511	17.4675
2008-08-23 11:15:15	2008-08-23 11:15:15	126.981	75.6975	6.1883	17.7421
2008-08-23 11:23:14	2008-08-23 11:23:14	127.075	75.7069	6.124	17.9507
2008-08-23 11:31:15	2008-08-23 11:31:15	127.169	75.7166	6.0851	18.0654
2008-08-23 11:39:14	2008-08-23 11:39:14	127.263	75.7264	6.0239	18.2527
2008-08-23 11:47:15	2008-08-23 11:47:15	127.357	75.7363	5.7779	18.7718
2008-08-23 11:55:14	2008-08-23 11:55:14	127.451	75.7462	5.4986	19.3081
2008-08-23 12:03:15	2008-08-23 12:03:15	127.545	75.756	5.3017	19.7077
2008-08-23 12:11:15	2008-08-23 12:11:15	127.639	75.7659	5.2636	19.8035
2008-08-23 12:19:14	2008-08-23 12:19:14	127.732	75.7756	5.3019	19.6488
2008-08-23 12:27:15	2008-08-23 12:27:15	127.826	75.7854	5.4739	19.2615
2008-08-23 12:35:14	2008-08-23 12:35:14	127.92	75.7945	5.576	18.7841
2008-08-23 12:43:15	2008-08-23 12:43:15	128.013	75.8031	5.6624	18.3254
2008-08-23 12:51:14	2008-08-23 12:51:14	128.107	75.8118	5.7232	17.8845
2008-08-23 12:59:15	2008-08-23 12:59:15	128.202	75.8208	5.7841	17.5343
2008-08-23 13:07:14	2008-08-23 13:07:14	128.297	75.8299	5.8248	17.2368
2008-08-23 13:15:15	2008-08-23 13:15:15	128.393	75.839	5.8651	16.9584
2008-08-23 13:23:14	2008-08-23 13:23:14	128.488	75.849	5.8945	16.8357
2008-08-23 13:31:14	2008-08-23 13:31:14	128.584	75.859	5.9003	16.9042
2008-08-23 13:39:15	2008-08-23 13:39:15	128.68	75.8691	5.8887	17.1155
2008-08-23 13:47:14	2008-08-23 13:47:14	128.777	75.8792	5.8684	17.4126
2008-08-23 13:55:15	2008-08-23 13:55:15	128.873	75.8894	5.8495	17.639
2008-08-23 14:03:14	2008-08-23 14:03:14	128.971	75.8993	5.8688	17.6579
2008-08-23 14:11:15	2008-08-23 14:11:15	129.07	75.909	5.964	17.5157
2008-08-23 14:19:14	2008-08-23 14:19:14	129.169	75.9188	6.0562	17.2041
2008-08-23 14:27:15	2008-08-23 14:27:15	129.269	75.9284	6.1187	16.668
2008-08-23 14:35:14	2008-08-23 14:35:14	129.37	75.9377	6.205	15.8619
2008-08-23 14:43:14	2008-08-23 14:43:14	129.469	75.9476	6.2705	15.2878
2008-08-23 14:51:15	2008-08-23 14:51:15	129.568	75.9577	6.3253	15.1009
2008-08-23 14:59:14	2008-08-23 14:59:14	129.667	75.9676	6.4	14.86
2008-08-23 15:07:15	2008-08-23 15:07:15	129.759	75.9774	6.4464	14.5587
2008-08-23 15:15:14	2008-08-23 15:15:14	129.84	75.9852	6.5273	14.0788
2008-08-23 15:23:15	2008-08-23 15:23:15	129.912	75.9928	6.5773	13.786
2008-08-23 15:31:14	2008-08-23 15:31:14	129.953	76.0026	6.6278	13.5738
2008-08-23 15:39:15	2008-08-23 15:39:15	129.957	76.0009	6.6895	13.425
2008-08-23 15:47:14	2008-08-23 15:47:14	129.959	75.9996	6.7376	13.3487
2008-08-23 15:55:14	2008-08-23 15:55:14	129.962	75.9979	6.7941	13.2679
2008-08-23 16:03:15	2008-08-23 16:03:15	129.964	75.9963	6.8381	13.1673
2008-08-23 16:11:14	2008-08-23 16:11:14	129.966	75.9945	6.8611	13.0503
2008-08-23 16:19:15	2008-08-23 16:19:15	129.968	75.9928	6.8621	12.8872
2008-08-23 16:27:14	2008-08-23 16:27:14	129.972	75.9912	6.8443	12.6948
2008-08-23 16:35:15	2008-08-23 16:35:15	129.973	75.988	6.8708	12.5466
2008-08-23 16:43:14	2008-08-23 16:43:14	129.988	75.9866	6.8837	12.4177
2008-08-23 16:51:15	2008-08-23 16:51:15	129.994	75.9859	6.9045	12.3297
2008-08-23 16:59:14	2008-08-23 16:59:14	129.998	75.9846	6.9226	12.2367
2008-08-23 17:07:14	2008-08-23 17:07:14	130.003	75.9832	6.939	12.167
2008-08-23 17:15:15	2008-08-23 17:15:15	130.006	75.9817	6.9858	12.1038
2008-08-23 17:23:14	2008-08-23 17:23:14	130.011	75.9803	7.0149	12.0434
2008-08-23 17:31:15	2008-08-23 17:31:15	130.015	75.9788	7.0114	11.984
2008-08-23 17:39:14	2008-08-23 17:39:14	130.019	75.9775	7.0106	11.9222
2008-08-23 17:47:15	2008-08-23 17:47:15	130.023	75.9762	7.0093	11.865
2008-08-23 17:55:14	2008-08-23 17:55:14	130.026	75.9748	6.9814	11.8123
2008-08-23 18:03:15	2008-08-23 18:03:15	130.03	75.9734	6.9538	11.7584
2008-08-23 18:11:15	2008-08-23 18:11:15	130.033	75.9721	6.9383	11.6947
2008-08-23 18:19:14	2008-08-23 18:19:14	130.035	75.9707	6.9089	11.6374
2008-08-23 18:27:15	2008-08-23 18:27:15	130.038	75.9695	6.8907	11.5811
2008-08-23 18:35:14	2008-08-23 18:35:14	130.041	75.9684	6.8642	11.5308
2008-08-23 18:43:15	2008-08-23 18:43:15	130.043	75.9671	6.8448	11.4811
2008-08-23 18:51:14	2008-08-23 18:51:14	130.045	75.966	6.8305	11.4345
2008-08-23 18:59:15	2008-08-23 18:59:15	130.046	75.9648	6.8292	11.3923
2008-08-23 19:07:14	2008-08-23 19:07:14	130.048	75.9636	6.8255	11.3508
2008-08-23 19:15:15	2008-08-23 19:15:15	130.049	75.9626	6.8241	11.3102
2008-08-23 19:23:14	2008-08-23 19:23:14	130.05	75.9616	6.8251	11.2678
2008-08-23 19:31:14	2008-08-23 19:31:14	130.051	75.9607	6.8244	11.2264
2008-08-23 19:39:15	2008-08-23 19:39:15	130.052	75.9599	6.8238	11.1915
2008-08-23 19:47:14	2008-08-23 19:47:14	130.052	75.9591	6.8226	11.1568
2008-08-23 19:55:15	2008-08-23 19:55:15	130.052	75.9584	6.8237	11.1304
2008-08-23 20:03:14	2008-08-23 20:03:14	130.052	75.9576	6.8198	11.1066
2008-08-23 20:11:15	2008-08-23 20:11:15	130.052	75.9569	6.8194	11.0853
2008-08-23 20:19:14	2008-08-23 20:19:14	130.052	75.9564	6.8197	11.0672
2008-08-23 20:27:15	2008-08-23 20:27:15	130.052	75.9558	6.8226	11.0512
2008-08-23 20:35:14	2008-08-23 20:35:14	130.052	75.9555	6.8217	11.037
2008-08-23 20:43:14	2008-08-23 20:43:14	130.051	75.9552	6.8148	11.0264
2008-08-23 20:51:15	2008-08-23 20:51:15	130.051	75.9549	6.8156	11.0155
2008-08-23 20:59:14	2008-08-23 20:59:14	130.05	75.9546	6.8134	11.008
2008-08-23 21:07:15	2008-08-23 21:07:15	130.05	75.9545	6.8162	11.0027
2008-08-23 21:15:14	2008-08-23 21:15:14	130.05	75.9545	6.825	11.0001
2008-08-23 21:23:15	2008-08-23 21:23:15	130.05	75.9546	6.8349	10.9968
2008-08-23 21:31:14	2008-08-23 21:31:14	130.05	75.9545	6.8342	10.9963
2008-08-23 21:39:15	2008-08-23 21:39:15	130.05	75.9547	6.8307	10.9951
2008-08-23 21:47:14	2008-08-23 21:47:14	130.05	75.9551	6.8317	10.9939
2008-08-23 21:55:14	2008-08-23 21:55:14	130.051	75.9553	6.8399	10.9944
2008-08-23 22:03:15	2008-08-23 22:03:15	130.052	75.9558	6.8424	10.9963
2008-08-23 22:11:14	2008-08-23 22:11:14	130.053	75.9563	6.8403	10.9997
2008-08-23 22:19:15	2008-08-23 22:19:15	130.054	75.9568	6.8371	11.0094
2008-08-23 22:27:14	2008-08-23 22:27:14	130.055	75.9576	6.822	11.0204
2008-08-23 22:35:15	2008-08-23 22:35:15	130.056	75.9581	6.8193	11.0241
2008-08-23 22:43:14	2008-08-23 22:43:14	130.057	75.9587	6.8402	11.0241
2008-08-23 22:51:15	2008-08-23 22:51:15	130.059	75.9596	6.8729	11.024
2008-08-23 22:59:14	2008-08-23 22:59:14	130.062	75.9602	6.875	11.0206
2008-08-23 23:07:14	2008-08-23 23:07:14	130.064	75.9612	6.888	11.0178
2008-08-23 23:15:15	2008-08-23 23:15:15	130.067	75.9623	6.8951	11.0137
2008-08-23 23:23:14	2008-08-23 23:23:14	130.071	75.9635	6.9103	11.0105
2008-08-23 23:31:15	2008-08-23 23:31:15	130.075	75.9646	6.9376	11.0079
2008-08-23 23:39:14	2008-08-23 23:39:14	130.079	75.9658	6.9578	11.0051
2008-08-23 23:47:15	2008-08-23 23:47:15	130.083	75.967	6.9691	11.0031
2008-08-23 23:55:14	2008-08-23 23:55:14	130.088	75.9682	6.9731	10.9989
2008-08-24 00:03:15	2008-08-24 00:03:15	130.094	75.9694	6.9844	10.9916
2008-08-24 00:11:15	2008-08-24 00:11:15	130.1	75.9704	6.9797	10.9783
2008-08-24 00:19:14	2008-08-24 00:19:14	130.106	75.9717	6.9787	10.9595
2008-08-24 00:27:15	2008-08-24 00:27:15	130.112	75.9727	6.9619	10.9381
2008-08-24 00:35:14	2008-08-24 00:35:14	130.119	75.9738	6.9575	10.9178
2008-08-24 00:43:15	2008-08-24 00:43:15	130.126	75.9747	6.9277	10.8854
2008-08-24 00:51:14	2008-08-24 00:51:14	130.133	75.9757	6.8912	10.8766
2008-08-24 00:59:15	2008-08-24 00:59:15	130.141	75.978	6.8554	10.8964
2008-08-24 01:07:14	2008-08-24 01:07:14	130.091	75.9825	6.8218	10.9447
2008-08-24 01:15:15	2008-08-24 01:15:15	130.02	75.9875	6.7546	11.093
2008-08-24 01:23:14	2008-08-24 01:23:14	129.966	75.9938	6.639	11.4332
2008-08-24 01:31:14	2008-08-24 01:31:14	129.97	75.9962	6.6083	11.4818
2008-08-24 01:39:15	2008-08-24 01:39:15	129.977	75.9969	6.6103	11.4333
2008-08-24 01:47:14	2008-08-24 01:47:14	129.985	75.9972	6.6069	11.3873
2008-08-24 01:55:15	2008-08-24 01:55:15	129.992	75.9978	6.6205	11.3496
2008-08-24 02:03:14	2008-08-24 02:03:14	130	75.9982	6.6364	11.3011
2008-08-24 02:11:15	2008-08-24 02:11:15	130.007	75.9984	6.6455	11.2576
2008-08-24 02:19:14	2008-08-24 02:19:14	130.015	75.9989	6.6604	11.2165
2008-08-24 02:27:15	2008-08-24 02:27:15	130.022	75.9991	6.6803	11.1827
2008-08-24 02:35:14	2008-08-24 02:35:14	130.031	75.9993	6.7046	11.1501
2008-08-24 02:43:14	2008-08-24 02:43:14	130.038	75.9996	6.7243	11.1222
2008-08-24 02:51:15	2008-08-24 02:51:15	130.046	75.9999	6.7548	11.0991
2008-08-24 02:59:14	2008-08-24 02:59:14	130.054	76	6.7863	11.08
2008-08-24 03:07:15	2008-08-24 03:07:15	130.062	76.0002	6.8308	11.0654
2008-08-24 03:15:14	2008-08-24 03:15:14	130.07	76.0003	6.8352	11.0604
2008-08-24 03:23:15	2008-08-24 03:23:15	130.078	76.0006	6.8349	11.0717
2008-08-24 03:31:14	2008-08-24 03:31:14	130.091	76	6.7944	11.1797
2008-08-24 03:39:15	2008-08-24 03:39:15	130.04	75.9951	6.7553	11.3786
2008-08-24 03:47:14	2008-08-24 03:47:14	129.99	75.9926	6.7059	11.6655
2008-08-24 03:55:14	2008-08-24 03:55:14	129.972	75.9919	6.6819	11.7375
2008-08-24 04:03:15	2008-08-24 04:03:15	129.974	75.993	6.6787	11.8794
2008-08-24 04:11:14	2008-08-24 04:11:14	129.979	75.9946	6.684	11.8494
2008-08-24 04:19:15	2008-08-24 04:19:15	129.975	75.995	6.6943	11.6552
2008-08-24 04:27:14	2008-08-24 04:27:14	129.958	75.9819	6.6751	11.6016
2008-08-24 04:35:15	2008-08-24 04:35:15	129.958	75.9596	6.6483	11.7
2008-08-24 04:43:14	2008-08-24 04:43:14	129.961	75.9362	6.642	11.8214
2008-08-24 04:51:15	2008-08-24 04:51:15	129.963	75.9119	6.6433	11.9806
2008-08-24 04:59:14	2008-08-24 04:59:14	129.967	75.8874	6.6724	12.2691
2008-08-24 05:07:14	2008-08-24 05:07:14	129.971	75.861	6.6793	12.6455
2008-08-24 05:15:15	2008-08-24 05:15:15	129.975	75.8347	6.7273	12.7967
2008-08-24 05:23:14	2008-08-24 05:23:14	129.977	75.8083	6.7815	12.8354
2008-08-24 05:31:15	2008-08-24 05:31:15	129.978	75.782	6.8691	12.5544
2008-08-24 05:39:14	2008-08-24 05:39:14	129.98	75.7558	7.038	12.0684
2008-08-24 05:47:15	2008-08-24 05:47:15	129.981	75.7297	7.1418	11.4045
2008-08-24 05:55:14	2008-08-24 05:55:14	129.982	75.7035	7.1999	10.5798
2008-08-24 06:03:15	2008-08-24 06:03:15	129.983	75.6774	7.2278	9.9627
2008-08-24 06:11:15	2008-08-24 06:11:15	129.984	75.6513	7.2688	9.4686
2008-08-24 06:19:14	2008-08-24 06:19:14	129.983	75.6252	7.3112	9.1254
2008-08-24 06:27:15	2008-08-24 06:27:15	129.982	75.599	7.3637	8.7911
2008-08-24 06:35:14	2008-08-24 06:35:14	129.979	75.573	7.405	8.4965
2008-08-24 06:43:15	2008-08-24 06:43:15	129.981	75.5468	7.4074	8.2794
2008-08-24 06:51:14	2008-08-24 06:51:14	129.983	75.5209	7.4206	8.0632
2008-08-24 06:59:15	2008-08-24 06:59:15	129.985	75.495	7.4663	7.7831
2008-08-24 07:07:14	2008-08-24 07:07:14	129.987	75.4692	7.5205	7.518
2008-08-24 07:15:15	2008-08-24 07:15:15	129.991	75.4434	7.5579	7.299
2008-08-24 07:23:14	2008-08-24 07:23:14	129.997	75.4175	7.5795	7.1316
2008-08-24 07:31:14	2008-08-24 07:31:14	130.004	75.3915	7.597	6.9925
2008-08-24 07:39:15	2008-08-24 07:39:15	130.007	75.3654	7.5667	6.9641
2008-08-24 07:47:14	2008-08-24 07:47:14	130.003	75.3394	7.5181	7.0215
2008-08-24 07:55:15	2008-08-24 07:55:15	130.001	75.3135	7.4963	7.0586
2008-08-24 08:03:14	2008-08-24 08:03:14	129.999	75.2885	7.4805	7.0674
2008-08-24 08:11:15	2008-08-24 08:11:15	129.996	75.2663	7.4893	7.0708
2008-08-24 08:19:14	2008-08-24 08:19:14	130.013	75.2659	7.5041	7.0555
2008-08-24 08:27:15	2008-08-24 08:27:15	130.021	75.2663	7.5328	7.0257
2008-08-24 08:35:14	2008-08-24 08:35:14	130.027	75.2671	7.5547	6.9967
2008-08-24 08:43:14	2008-08-24 08:43:14	130.03	75.268	7.5434	6.9774
2008-08-24 08:51:15	2008-08-24 08:51:15	130.033	75.2688	7.5785	6.9339
2008-08-24 08:59:14	2008-08-24 08:59:14	130.051	75.2558	7.6539	6.8361
2008-08-24 09:07:15	2008-08-24 09:07:15	130.073	75.2306	7.6768	6.717
2008-08-24 09:15:14	2008-08-24 09:15:14	130.105	75.2062	7.6909	6.5612
2008-08-24 09:23:15	2008-08-24 09:23:15	130.144	75.1825	7.6934	6.4233
2008-08-24 09:31:14	2008-08-24 09:31:14	130.185	75.1589	7.5689	6.3423
2008-08-24 09:39:15	2008-08-24 09:39:15	130.226	75.1357	7.54	6.3334
2008-08-24 09:47:14	2008-08-24 09:47:14	130.267	75.1127	7.599	6.2122
2008-08-24 09:55:14	2008-08-24 09:55:14	130.305	75.0893	7.543	6.0256
2008-08-24 10:03:15	2008-08-24 10:03:15	130.341	75.0658	7.5051	5.8152
2008-08-24 10:11:14	2008-08-24 10:11:14	130.381	75.043	7.4815	5.6825
2008-08-24 10:19:15	2008-08-24 10:19:15	130.42	75.0202	7.4294	5.5931
2008-08-24 10:27:14	2008-08-24 10:27:14	130.459	74.9973	7.4217	5.5242
2008-08-24 10:35:15	2008-08-24 10:35:15	130.498	74.9744	7.4775	5.4726
2008-08-24 10:43:14	2008-08-24 10:43:14	130.537	74.9514	7.5345	5.4365
2008-08-24 10:51:15	2008-08-24 10:51:15	130.563	74.937	7.5819	5.4128
2008-08-24 10:59:14	2008-08-24 10:59:14	130.575	74.9334	7.6111	5.3926
2008-08-24 11:07:14	2008-08-24 11:07:14	130.585	74.9286	7.6312	5.3724
2008-08-24 11:15:15	2008-08-24 11:15:15	130.597	74.9181	7.5643	5.3671
2008-08-24 11:23:14	2008-08-24 11:23:14	130.616	74.9066	7.4282	5.3955
2008-08-24 11:31:15	2008-08-24 11:31:15	130.634	74.8951	7.4036	5.4362
2008-08-24 11:39:14	2008-08-24 11:39:14	130.653	74.8837	7.3606	5.4468
2008-08-24 11:47:15	2008-08-24 11:47:15	130.663	74.873	7.3436	5.4214
2008-08-24 11:55:14	2008-08-24 11:55:14	130.628	74.8654	7.3813	5.397
2008-08-24 12:03:15	2008-08-24 12:03:15	130.594	74.8577	7.39	5.3911
2008-08-24 12:11:15	2008-08-24 12:11:15	130.56	74.8497	7.4389	5.3752
2008-08-24 12:19:14	2008-08-24 12:19:14	130.527	74.8416	7.4945	5.3312
2008-08-24 12:27:15	2008-08-24 12:27:15	130.493	74.8335	7.5835	5.255
2008-08-24 12:35:14	2008-08-24 12:35:14	130.458	74.8255	7.7083	5.1624
2008-08-24 12:43:15	2008-08-24 12:43:15	130.424	74.8175	7.8408	5.0838
2008-08-24 12:51:14	2008-08-24 12:51:14	130.389	74.8096	7.947	5.0751
2008-08-24 12:59:15	2008-08-24 12:59:15	130.355	74.8016	8.0145	5.1018
2008-08-24 13:07:14	2008-08-24 13:07:14	130.32	74.7935	8.1122	5.1194
2008-08-24 13:15:15	2008-08-24 13:15:15	130.285	74.7853	8.1813	5.1067
2008-08-24 13:23:14	2008-08-24 13:23:14	130.25	74.7771	8.2359	5.0681
2008-08-24 13:31:14	2008-08-24 13:31:14	130.216	74.7688	8.2964	5.0256
2008-08-24 13:39:15	2008-08-24 13:39:15	130.181	74.7605	8.3541	4.98
2008-08-24 13:47:14	2008-08-24 13:47:14	130.146	74.7522	8.3703	4.9544
2008-08-24 13:55:15	2008-08-24 13:55:15	130.111	74.7438	8.3216	4.9759
2008-08-24 14:03:14	2008-08-24 14:03:14	130.077	74.7356	8.2412	5.0359
2008-08-24 14:11:15	2008-08-24 14:11:15	130.047	74.7283	8.1715	5.0932
2008-08-24 14:19:14	2008-08-24 14:19:14	130.036	74.7253	8.1091	5.1477
2008-08-24 14:27:15	2008-08-24 14:27:15	130.016	74.7239	8.0947	5.1736
2008-08-24 14:35:14	2008-08-24 14:35:14	130.018	74.7238	8.1035	5.1895
2008-08-24 14:43:14	2008-08-24 14:43:14	130.024	74.7233	8.0986	5.1953
2008-08-24 14:51:15	2008-08-24 14:51:15	130.03	74.7231	8.125	5.1869
2008-08-24 14:59:14	2008-08-24 14:59:14	130.036	74.7228	8.1152	5.1855
2008-08-24 15:07:15	2008-08-24 15:07:15	130.042	74.7226	8.1267	5.1769
2008-08-24 15:15:14	2008-08-24 15:15:14	130.048	74.7222	8.1071	5.1737
2008-08-24 15:23:15	2008-08-24 15:23:15	130.054	74.7218	8.1143	5.1639
2008-08-24 15:31:14	2008-08-24 15:31:14	130.059	74.7215	8.1233	5.1558
2008-08-24 15:39:15	2008-08-24 15:39:15	130.064	74.7211	8.1181	5.1509
2008-08-24 15:47:14	2008-08-24 15:47:14	130.069	74.7206	8.1112	5.1473
2008-08-24 15:55:14	2008-08-24 15:55:14	130.074	74.72	8.0653	5.1562
2008-08-24 16:03:15	2008-08-24 16:03:15	130.079	74.719	8.0581	5.2097
2008-08-24 16:11:14	2008-08-24 16:11:14	130.083	74.708	8.1184	5.1959
2008-08-24 16:19:15	2008-08-24 16:19:15	130.076	74.6838	8.1624	5.1643
2008-08-24 16:27:14	2008-08-24 16:27:14	130.069	74.6577	8.1402	5.1385
2008-08-24 16:35:15	2008-08-24 16:35:15	130.063	74.6316	8.1257	5.0805
2008-08-24 16:43:14	2008-08-24 16:43:14	130.057	74.6055	8.126	4.9954
2008-08-24 16:51:15	2008-08-24 16:51:15	130.051	74.5796	8.1507	4.9055
2008-08-24 16:59:14	2008-08-24 16:59:14	130.046	74.5537	8.1374	4.8153
2008-08-24 17:07:14	2008-08-24 17:07:14	130.041	74.5281	8.0527	4.7593
2008-08-24 17:15:15	2008-08-24 17:15:15	130.036	74.5027	7.9329	4.8364
2008-08-24 17:23:14	2008-08-24 17:23:14	130.032	74.4773	7.7178	4.9916
2008-08-24 17:31:15	2008-08-24 17:31:15	130.027	74.4522	7.5502	5.0573
2008-08-24 17:39:14	2008-08-24 17:39:14	130.024	74.4272	7.4094	5.0983
2008-08-24 17:47:15	2008-08-24 17:47:15	130.02	74.4021	7.2959	5.0929
2008-08-24 17:55:14	2008-08-24 17:55:14	130.016	74.3768	7.2568	5.0782
2008-08-24 18:03:15	2008-08-24 18:03:15	130.011	74.3514	7.2922	5.1158
2008-08-24 18:11:15	2008-08-24 18:11:15	130.008	74.3257	7.4018	5.2349
2008-08-24 18:19:14	2008-08-24 18:19:14	130.006	74.2998	7.4733	5.3206
2008-08-24 18:27:15	2008-08-24 18:27:15	130.003	74.2738	7.5213	5.3783
2008-08-24 18:35:14	2008-08-24 18:35:14	130	74.2477	7.5721	5.4605
2008-08-24 18:43:15	2008-08-24 18:43:15	129.999	74.2216	7.6412	5.5768
2008-08-24 18:51:14	2008-08-24 18:51:14	129.999	74.1954	7.7349	5.7607
2008-08-24 18:59:15	2008-08-24 18:59:15	129.998	74.1691	7.8161	5.898
2008-08-24 19:07:14	2008-08-24 19:07:14	129.996	74.1465	7.846	6.0119
2008-08-24 19:15:15	2008-08-24 19:15:15	129.994	74.1335	7.8532	6.0923
2008-08-24 19:23:14	2008-08-24 19:23:14	130.002	74.131	7.883	6.174
2008-08-24 19:31:14	2008-08-24 19:31:14	130.005	74.1294	7.9185	6.1091
2008-08-24 19:39:15	2008-08-24 19:39:15	130.009	74.1235	7.7278	5.9008
2008-08-24 19:47:14	2008-08-24 19:47:14	130.006	74.1007	7.5946	5.827
2008-08-24 19:55:15	2008-08-24 19:55:15	130.004	74.0746	7.7246	5.9166
2008-08-24 20:03:14	2008-08-24 20:03:14	130.004	74.0485	7.9886	6.2102
2008-08-24 20:11:15	2008-08-24 20:11:15	130.003	74.0226	8.1097	6.1366
2008-08-24 20:19:14	2008-08-24 20:19:14	130.001	73.9971	8.1218	5.9183
2008-08-24 20:27:15	2008-08-24 20:27:15	129.999	73.9719	7.9576	5.6842
2008-08-24 20:35:14	2008-08-24 20:35:14	129.998	73.9465	7.7912	5.5925
2008-08-24 20:43:14	2008-08-24 20:43:14	129.999	73.921	7.8029	5.5535
2008-08-24 20:51:15	2008-08-24 20:51:15	130	73.8955	7.842	5.519
2008-08-24 20:59:14	2008-08-24 20:59:14	129.999	73.8702	7.7883	5.5401
2008-08-24 21:07:15	2008-08-24 21:07:15	129.998	73.8445	7.8552	5.638
2008-08-24 21:15:14	2008-08-24 21:15:14	129.997	73.8185	7.8973	5.7465
2008-08-24 21:23:15	2008-08-24 21:23:15	129.999	73.7924	7.9866	5.8768
2008-08-24 21:31:14	2008-08-24 21:31:14	130.001	73.766	8.0944	5.9862
2008-08-24 21:39:15	2008-08-24 21:39:15	130.002	73.74	8.25	6.1251
2008-08-24 21:47:14	2008-08-24 21:47:14	130	73.7138	8.3911	6.1595
2008-08-24 21:55:14	2008-08-24 21:55:14	129.999	73.6876	8.7938	5.9961
2008-08-24 22:03:15	2008-08-24 22:03:15	130	73.6616	9.2339	5.7851
2008-08-24 22:11:14	2008-08-24 22:11:14	130.001	73.6357	9.6089	5.5695
2008-08-24 22:19:15	2008-08-24 22:19:15	130.001	73.6106	9.912	5.4442
2008-08-24 22:27:14	2008-08-24 22:27:14	130.001	73.5858	10.063	5.3689
2008-08-24 22:35:15	2008-08-24 22:35:15	130.001	73.5683	10.1494	5.3227
2008-08-24 22:43:14	2008-08-24 22:43:14	130.008	73.5654	10.2219	5.2934
2008-08-24 22:51:15	2008-08-24 22:51:15	130.009	73.5642	10.2655	5.2792
2008-08-24 22:59:14	2008-08-24 22:59:14	130.008	73.5632	10.3029	5.2756
2008-08-24 23:07:14	2008-08-24 23:07:14	130.007	73.5621	10.3116	5.2805
2008-08-24 23:15:15	2008-08-24 23:15:15	130.006	73.5611	10.3049	5.2944
2008-08-24 23:23:14	2008-08-24 23:23:14	130.004	73.5602	10.3258	5.3049
2008-08-24 23:31:15	2008-08-24 23:31:15	130.002	73.5592	10.3401	5.3151
2008-08-24 23:39:14	2008-08-24 23:39:14	130	73.5585	10.3208	5.3511
2008-08-24 23:47:15	2008-08-24 23:47:15	129.997	73.5577	10.295	5.4032
2008-08-24 23:55:14	2008-08-24 23:55:14	129.993	73.5571	10.3233	5.5014
2008-08-25 00:03:15	2008-08-25 00:03:15	129.993	73.5542	10.0942	5.8609
2008-08-25 00:11:15	2008-08-25 00:11:15	129.995	73.5379	10.2524	5.9771
2008-08-25 00:19:14	2008-08-25 00:19:14	129.994	73.5166	10.5276	5.9735
2008-08-25 00:27:15	2008-08-25 00:27:15	129.993	73.4925	10.7302	6.0269
2008-08-25 00:35:14	2008-08-25 00:35:14	129.994	73.4678	10.7536	6.2304
2008-08-25 00:43:15	2008-08-25 00:43:15	129.993	73.4433	10.6684	6.5921
2008-08-25 00:51:14	2008-08-25 00:51:14	129.992	73.4187	10.5411	6.9272
2008-08-25 00:59:15	2008-08-25 00:59:15	129.993	73.3945	10.4525	7.151
2008-08-25 01:07:14	2008-08-25 01:07:14	129.992	73.3727	10.3569	7.325
2008-08-25 01:15:15	2008-08-25 01:15:15	129.997	73.3664	10.2899	7.4266
2008-08-25 01:23:14	2008-08-25 01:23:14	129.996	73.3667	10.261	7.4647
2008-08-25 01:31:14	2008-08-25 01:31:14	129.995	73.3668	10.0844	7.5909
2008-08-25 01:39:15	2008-08-25 01:39:15	129.995	73.3506	9.9341	7.7418
2008-08-25 01:47:14	2008-08-25 01:47:14	129.992	73.327	10.0711	7.5112
2008-08-25 01:55:15	2008-08-25 01:55:15	129.99	73.3032	10.6423	6.2588
2008-08-25 02:03:14	2008-08-25 02:03:14	129.988	73.2794	10.9832	5.078
2008-08-25 02:11:15	2008-08-25 02:11:15	129.987	73.2556	11.1884	4.19
2008-08-25 02:19:14	2008-08-25 02:19:14	129.987	73.2322	11.2572	3.6107
2008-08-25 02:27:15	2008-08-25 02:27:15	129.987	73.2092	11.2197	3.3754
2008-08-25 02:35:14	2008-08-25 02:35:14	129.988	73.1878	11.093	3.5246
2008-08-25 02:43:14	2008-08-25 02:43:14	129.995	73.1844	10.9697	3.8321
2008-08-25 02:51:15	2008-08-25 02:51:15	129.991	73.186	10.9877	3.5936
2008-08-25 02:59:14	2008-08-25 02:59:14	129.986	73.1879	10.9766	3.3924
2008-08-25 03:07:15	2008-08-25 03:07:15	129.982	73.1869	10.9865	3.2735
2008-08-25 03:15:14	2008-08-25 03:15:14	129.975	73.1829	11.0143	3.1711
2008-08-25 03:23:15	2008-08-25 03:23:15	129.976	73.1773	11.1145	3.0583
2008-08-25 03:31:14	2008-08-25 03:31:14	129.978	73.1685	11.2207	2.9462
2008-08-25 03:39:15	2008-08-25 03:39:15	129.981	73.1594	11.3181	2.7784
2008-08-25 03:47:14	2008-08-25 03:47:14	129.983	73.1502	11.4789	2.5303
2008-08-25 03:55:14	2008-08-25 03:55:14	129.985	73.141	11.651	2.265
2008-08-25 04:03:15	2008-08-25 04:03:15	129.988	73.13	11.7974	2.0515
2008-08-25 04:11:14	2008-08-25 04:11:14	129.989	73.1186	11.9045	1.9325
2008-08-25 04:19:15	2008-08-25 04:19:15	129.989	73.1071	12.0146	1.839
2008-08-25 04:27:14	2008-08-25 04:27:14	129.989	73.0955	12.1235	1.7523
2008-08-25 04:35:15	2008-08-25 04:35:15	129.99	73.0842	12.2073	1.6671
2008-08-25 04:43:14	2008-08-25 04:43:14	129.99	73.073	12.2679	1.5793
2008-08-25 04:51:15	2008-08-25 04:51:15	129.991	73.0618	12.3205	1.5014
2008-08-25 04:59:14	2008-08-25 04:59:14	129.99	73.0554	12.3582	1.4455
2008-08-25 05:07:14	2008-08-25 05:07:14	129.992	73.0462	12.3853	1.4061
2008-08-25 05:15:15	2008-08-25 05:15:15	129.995	73.0358	12.3906	1.3867
2008-08-25 05:23:14	2008-08-25 05:23:14	129.997	73.0292	12.3934	1.3774
2008-08-25 05:31:15	2008-08-25 05:31:15	129.998	73.0251	12.3995	1.373
2008-08-25 05:39:14	2008-08-25 05:39:14	129.998	73.0205	12.4003	1.3806
2008-08-25 05:47:15	2008-08-25 05:47:15	130.005	73.0249	12.4152	1.3877
2008-08-25 05:55:14	2008-08-25 05:55:14	129.998	73.0284	12.4062	1.3655
2008-08-25 06:03:15	2008-08-25 06:03:15	129.991	73.0321	12.3509	1.3277
2008-08-25 06:11:15	2008-08-25 06:11:15	129.989	73.0231	12.3221	1.3069
2008-08-25 06:19:14	2008-08-25 06:19:14	129.988	73.0189	12.319	1.2933
2008-08-25 06:27:15	2008-08-25 06:27:15	129.982	73.0207	12.3185	1.282
2008-08-25 06:35:14	2008-08-25 06:35:14	129.982	73.0208	12.3025	1.2825
2008-08-25 06:43:15	2008-08-25 06:43:15	129.982	73.0208	12.2968	1.2779
2008-08-25 06:51:14	2008-08-25 06:51:14	129.982	73.0208	12.2988	1.2719
2008-08-25 06:59:15	2008-08-25 06:59:15	129.981	73.0209	12.3266	1.2709
2008-08-25 07:07:14	2008-08-25 07:07:14	129.981	73.0209	12.334	1.2906
2008-08-25 07:15:15	2008-08-25 07:15:15	129.981	73.0209	12.3415	1.3279
2008-08-25 07:23:14	2008-08-25 07:23:14	129.981	73.0209	12.3641	1.3515
2008-08-25 07:31:14	2008-08-25 07:31:14	129.981	73.0208	12.4095	1.3593
2008-08-25 07:39:15	2008-08-25 07:39:15	129.981	73.0208	12.4412	1.3798
2008-08-25 07:47:14	2008-08-25 07:47:14	129.981	73.0208	12.4604	1.3935
2008-08-25 07:55:15	2008-08-25 07:55:15	129.981	73.0209	12.4503	1.4273
2008-08-25 08:03:14	2008-08-25 08:03:14	129.981	73.0209	12.4528	1.4252
2008-08-25 08:11:15	2008-08-25 08:11:15	129.981	73.0209	12.466	1.4051
2008-08-25 08:19:14	2008-08-25 08:19:14	129.981	73.0209	12.4841	1.3876
2008-08-25 08:27:15	2008-08-25 08:27:15	129.981	73.0209	12.494	1.396
2008-08-25 08:35:14	2008-08-25 08:35:14	129.981	73.0209	12.4985	1.3903
2008-08-25 08:43:14	2008-08-25 08:43:14	129.981	73.0208	12.5083	1.3775
2008-08-25 08:51:15	2008-08-25 08:51:15	129.981	73.0209	12.502	1.3633
2008-08-25 08:59:14	2008-08-25 08:59:14	129.981	73.0208	12.4892	1.3467
2008-08-25 09:07:15	2008-08-25 09:07:15	129.981	73.0208	12.462	1.3272
2008-08-25 09:15:14	2008-08-25 09:15:14	129.981	73.0208	12.4134	1.3013
2008-08-25 09:23:15	2008-08-25 09:23:15	129.981	73.0208	12.338	1.2446
2008-08-25 09:31:14	2008-08-25 09:31:14	129.981	73.0208	12.2585	1.1699
2008-08-25 09:39:15	2008-08-25 09:39:15	129.981	73.0208	12.2005	1.0947
2008-08-25 09:47:14	2008-08-25 09:47:14	129.981	73.0208	12.1753	1.0238
2008-08-25 09:55:14	2008-08-25 09:55:14	129.981	73.0209	12.1453	0.9657
2008-08-25 10:03:15	2008-08-25 10:03:15	129.981	73.0209	12.111	0.9309
2008-08-25 10:11:14	2008-08-25 10:11:14	129.981	73.0208	12.0848	0.9322
2008-08-25 10:19:15	2008-08-25 10:19:15	129.981	73.0209	12.0676	0.9529
2008-08-25 10:27:14	2008-08-25 10:27:14	129.981	73.0208	12.0709	0.9857
2008-08-25 10:35:15	2008-08-25 10:35:15	129.981	73.0209	12.0916	1.0254
2008-08-25 10:43:14	2008-08-25 10:43:14	129.981	73.0208	12.1043	1.0728
2008-08-25 10:51:15	2008-08-25 10:51:15	129.981	73.0209	12.1201	1.1295
2008-08-25 10:59:14	2008-08-25 10:59:14	129.981	73.0209	12.1381	1.1637
2008-08-25 11:07:14	2008-08-25 11:07:14	129.981	73.0209	12.1547	1.1909
2008-08-25 11:15:15	2008-08-25 11:15:15	129.981	73.0208	12.188	1.2243
2008-08-25 11:23:14	2008-08-25 11:23:14	129.981	73.0208	12.2194	1.2579
2008-08-25 11:31:15	2008-08-25 11:31:15	129.981	73.0208	12.248	1.2842
2008-08-25 11:39:14	2008-08-25 11:39:14	129.981	73.0208	12.286	1.3225
2008-08-25 11:47:15	2008-08-25 11:47:15	129.981	73.0208	12.3101	1.3488
2008-08-25 11:55:14	2008-08-25 11:55:14	129.981	73.0209	12.3383	1.3698
2008-08-25 12:03:15	2008-08-25 12:03:15	129.981	73.0208	12.365	1.3878
2008-08-25 12:11:15	2008-08-25 12:11:15	129.981	73.0208	12.3973	1.386
2008-08-25 12:19:14	2008-08-25 12:19:14	129.981	73.0208	12.3999	1.377
2008-08-25 12:27:15	2008-08-25 12:27:15	129.981	73.0208	12.3978	1.3558
2008-08-25 12:35:14	2008-08-25 12:35:14	129.981	73.0208	12.3935	1.3491
2008-08-25 12:43:15	2008-08-25 12:43:15	129.981	73.0208	12.3841	1.3351
2008-08-25 12:51:14	2008-08-25 12:51:14	129.981	73.0208	12.3782	1.3141
2008-08-25 12:59:15	2008-08-25 12:59:15	129.981	73.0209	12.3787	1.3035
2008-08-25 13:07:14	2008-08-25 13:07:14	129.981	73.0208	12.3738	1.2881
2008-08-25 13:15:15	2008-08-25 13:15:15	129.981	73.0208	12.362	1.229
2008-08-25 13:23:14	2008-08-25 13:23:14	129.982	73.0206	12.2397	1.4947
2008-08-25 13:31:14	2008-08-25 13:31:14	129.988	73.0286	12.2946	1.3912
2008-08-25 13:39:15	2008-08-25 13:39:15	129.989	73.0322	12.3153	1.3296
2008-08-25 13:47:14	2008-08-25 13:47:14	129.986	73.0353	12.2153	1.2994
2008-08-25 13:55:15	2008-08-25 13:55:15	129.995	73.0304	12.1266	1.1793
2008-08-25 14:03:14	2008-08-25 14:03:14	129.988	73.0307	12.0707	1.0832
2008-08-25 14:11:15	2008-08-25 14:11:15	129.984	73.0263	12.0646	1.0359
2008-08-25 14:19:14	2008-08-25 14:19:14	129.978	73.022	12.0165	1.0315
2008-08-25 14:27:15	2008-08-25 14:27:15	129.975	73.0157	11.9689	0.9838
2008-08-25 14:35:14	2008-08-25 14:35:14	129.971	73.0068	11.9409	0.8936
2008-08-25 14:43:14	2008-08-25 14:43:14	129.97	72.9982	11.922	0.824
2008-08-25 14:51:15	2008-08-25 14:51:15	129.97	72.9896	11.9557	0.7924
2008-08-25 14:59:14	2008-08-25 14:59:14	129.978	72.9814	11.9824	0.7451
2008-08-25 15:07:15	2008-08-25 15:07:15	129.993	72.9742	11.9554	0.6844
2008-08-25 15:15:14	2008-08-25 15:15:14	130.008	72.9665	11.8185	0.6078
2008-08-25 15:23:15	2008-08-25 15:23:15	130.019	72.9576	11.7253	0.5404
2008-08-25 15:31:14	2008-08-25 15:31:14	130.028	72.9499	11.6808	0.5169
2008-08-25 15:39:15	2008-08-25 15:39:15	130.038	72.9417	11.7999	0.606
2008-08-25 15:47:14	2008-08-25 15:47:14	130.049	72.9333	11.9337	0.6961
2008-08-25 15:55:14	2008-08-25 15:55:14	130.06	72.9249	11.974	0.7145
2008-08-25 16:03:15	2008-08-25 16:03:15	130.07	72.9165	11.8734	0.6118
2008-08-25 16:11:14	2008-08-25 16:11:14	130.079	72.9074	11.8068	0.5173
2008-08-25 16:19:15	2008-08-25 16:19:15	130.086	72.8971	11.8817	0.4448
2008-08-25 16:27:14	2008-08-25 16:27:14	130.09	72.8883	12.1917	0.3805
2008-08-25 16:35:15	2008-08-25 16:35:15	130.094	72.8796	12.4873	0.3365
2008-08-25 16:43:14	2008-08-25 16:43:14	130.098	72.8708	12.6799	0.3002
2008-08-25 16:51:15	2008-08-25 16:51:15	130.103	72.8619	12.8436	0.2685
2008-08-25 16:59:14	2008-08-25 16:59:14	130.107	72.8529	13.0125	0.241
2008-08-25 17:07:14	2008-08-25 17:07:14	130.11	72.8446	13.0761	0.2229
2008-08-25 17:15:15	2008-08-25 17:15:15	130.115	72.8361	12.7898	0.2273
2008-08-25 17:23:14	2008-08-25 17:23:14	130.12	72.8278	12.5044	0.2597
2008-08-25 17:31:15	2008-08-25 17:31:15	130.126	72.8188	12.2808	0.3548
2008-08-25 17:39:14	2008-08-25 17:39:14	130.132	72.8147	12.2078	0.8244
2008-08-25 17:47:15	2008-08-25 17:47:15	130.145	72.8125	12.1954	1.3347
2008-08-25 17:55:14	2008-08-25 17:55:14	130.154	72.8102	12.1741	1.6992
2008-08-25 18:03:15	2008-08-25 18:03:15	130.167	72.8083	12.1754	1.8904
2008-08-25 18:11:15	2008-08-25 18:11:15	130.181	72.811	12.124	1.9725
2008-08-25 18:19:14	2008-08-25 18:19:14	130.195	72.8136	12.2688	1.9787
2008-08-25 18:27:15	2008-08-25 18:27:15	130.217	72.8041	12.4312	1.9797
2008-08-25 18:35:14	2008-08-25 18:35:14	130.244	72.7903	12.4818	1.9733
2008-08-25 18:43:15	2008-08-25 18:43:15	130.277	72.7746	12.6719	1.9757
2008-08-25 18:51:14	2008-08-25 18:51:14	130.314	72.7583	12.7828	1.9775
2008-08-25 18:59:15	2008-08-25 18:59:15	130.349	72.7415	12.7248	1.9688
2008-08-25 19:07:14	2008-08-25 19:07:14	130.384	72.7246	12.7612	1.9424
2008-08-25 19:15:15	2008-08-25 19:15:15	130.419	72.7079	12.8209	1.8989
2008-08-25 19:23:14	2008-08-25 19:23:14	130.453	72.6907	12.6708	1.9083
2008-08-25 19:31:14	2008-08-25 19:31:14	130.486	72.6734	12.7899	1.8608
2008-08-25 19:39:15	2008-08-25 19:39:15	130.523	72.6558	12.7901	1.8355
2008-08-25 19:47:14	2008-08-25 19:47:14	130.559	72.638	12.7678	1.8479
2008-08-25 19:55:15	2008-08-25 19:55:15	130.593	72.6196	12.7604	2.2539
2008-08-25 20:03:14	2008-08-25 20:03:14	130.628	72.6004	12.5992	2.723
2008-08-25 20:11:15	2008-08-25 20:11:15	130.66	72.5819	12.5372	3.2393
2008-08-25 20:19:14	2008-08-25 20:19:14	130.692	72.563	12.4105	3.2038
2008-08-25 20:27:15	2008-08-25 20:27:15	130.725	72.5433	12.2228	3.6683
2008-08-25 20:35:14	2008-08-25 20:35:14	130.758	72.5242	12.0315	4.0756
2008-08-25 20:43:14	2008-08-25 20:43:14	130.794	72.5054	11.9482	4.5854
2008-08-25 20:51:15	2008-08-25 20:51:15	130.831	72.4861	11.8557	4.834
2008-08-25 20:59:14	2008-08-25 20:59:14	130.868	72.4668	11.666	5.1766
2008-08-25 21:07:15	2008-08-25 21:07:15	130.905	72.4484	11.5045	5.7097
2008-08-25 21:15:14	2008-08-25 21:15:14	130.946	72.4303	11.0845	6.0919
2008-08-25 21:23:15	2008-08-25 21:23:15	130.985	72.4123	10.958	6.7879
2008-08-25 21:31:14	2008-08-25 21:31:14	131.024	72.3933	10.6892	7.134
2008-08-25 21:39:15	2008-08-25 21:39:15	131.061	72.3743	10.4026	7.5848
2008-08-25 21:47:14	2008-08-25 21:47:14	131.1	72.3552	10.0809	7.7105
2008-08-25 21:55:14	2008-08-25 21:55:14	131.137	72.3361	9.9083	7.5796
2008-08-25 22:03:15	2008-08-25 22:03:15	131.172	72.3162	9.6874	7.681
2008-08-25 22:11:14	2008-08-25 22:11:14	131.207	72.2959	9.9694	7.2769
2008-08-25 22:19:15	2008-08-25 22:19:15	131.244	72.2761	10.0109	7.0956
2008-08-25 22:27:14	2008-08-25 22:27:14	131.282	72.2565	9.9346	6.6274
2008-08-25 22:35:15	2008-08-25 22:35:15	131.319	72.2368	9.9265	6.0896
2008-08-25 22:43:14	2008-08-25 22:43:14	131.356	72.2168	9.8623	5.4261
2008-08-25 22:51:15	2008-08-25 22:51:15	131.394	72.1969	9.7817	5.0536
2008-08-25 22:59:14	2008-08-25 22:59:14	131.432	72.177	9.7659	4.7932
2008-08-25 23:07:14	2008-08-25 23:07:14	131.47	72.1569	9.7203	4.6344
2008-08-25 23:15:15	2008-08-25 23:15:15	131.508	72.1368	9.6936	4.5039
2008-08-25 23:23:14	2008-08-25 23:23:14	131.547	72.1165	9.7036	4.3609
2008-08-25 23:31:15	2008-08-25 23:31:15	131.586	72.096	9.6607	4.237
2008-08-25 23:39:14	2008-08-25 23:39:14	131.625	72.0755	9.6823	4.1186
2008-08-25 23:47:15	2008-08-25 23:47:15	131.664	72.0549	9.6519	4.0123
2008-08-25 23:55:14	2008-08-25 23:55:14	131.702	72.0338	9.613	4.1205
2008-08-26 00:03:15	2008-08-26 00:03:15	131.739	72.0134	9.2798	5.0612
2008-08-26 00:11:15	2008-08-26 00:11:15	131.796	72.001	8.4398	7.1624
2008-08-26 00:19:14	2008-08-26 00:19:14	131.857	71.9907	7.2058	9.6185
2008-08-26 00:27:15	2008-08-26 00:27:15	131.926	71.9828	6.316	11.2102
2008-08-26 00:35:14	2008-08-26 00:35:14	131.995	71.9758	5.5388	12.4386
2008-08-26 00:43:15	2008-08-26 00:43:15	132.065	71.9705	5.0116	13.2856
2008-08-26 00:51:14	2008-08-26 00:51:14	132.134	71.9652	4.3461	14.5424
2008-08-26 00:59:15	2008-08-26 00:59:15	132.203	71.9585	3.6173	16.136
2008-08-26 01:07:14	2008-08-26 01:07:14	132.273	71.9512	3.0337	17.6027
2008-08-26 01:15:15	2008-08-26 01:15:15	132.344	71.9435	2.522	19.1122
2008-08-26 01:23:14	2008-08-26 01:23:14	132.416	71.9365	2.1463	20.8613
2008-08-26 01:31:14	2008-08-26 01:31:14	132.489	71.9287	1.8881	22.1949
2008-08-26 01:39:15	2008-08-26 01:39:15	132.551	71.9222	1.6807	23.1731
2008-08-26 01:47:14	2008-08-26 01:47:14	132.579	71.9173	1.5566	23.7869
2008-08-26 01:55:15	2008-08-26 01:55:15	132.573	71.9159	1.4844	24.12
2008-08-26 02:03:14	2008-08-26 02:03:14	132.569	71.9134	1.3777	24.3984
2008-08-26 02:11:15	2008-08-26 02:11:15	132.592	71.9164	1.34	24.5241
2008-08-26 02:19:14	2008-08-26 02:19:14	132.597	71.92	1.259	24.6413
2008-08-26 02:27:15	2008-08-26 02:27:15	132.59	71.9221	1.227	24.7103
2008-08-26 02:35:14	2008-08-26 02:35:14	132.587	71.9232	1.2322	24.7604
2008-08-26 02:43:14	2008-08-26 02:43:14	132.587	71.9233	1.2392	24.7912
2008-08-26 02:51:15	2008-08-26 02:51:15	132.587	71.9238	1.2577	24.817
2008-08-26 02:59:14	2008-08-26 02:59:14	132.587	71.9238	1.2777	24.8299
2008-08-26 03:07:15	2008-08-26 03:07:15	132.587	71.9233	1.2814	24.8197
2008-08-26 03:15:14	2008-08-26 03:15:14	132.587	71.9233	1.2837	24.8454
2008-08-26 03:23:15	2008-08-26 03:23:15	132.587	71.9238	1.2872	24.8535
2008-08-26 03:31:14	2008-08-26 03:31:14	132.587	71.9237	1.2871	24.8383
2008-08-26 03:39:15	2008-08-26 03:39:15	132.587	71.9233	1.2803	24.8574
2008-08-26 03:47:14	2008-08-26 03:47:14	132.587	71.9236	1.2821	24.8648
2008-08-26 03:55:14	2008-08-26 03:55:14	132.587	71.9239	1.2677	24.8432
2008-08-26 04:03:15	2008-08-26 04:03:15	132.587	71.9235	1.2665	24.8453
2008-08-26 04:11:14	2008-08-26 04:11:14	132.587	71.9233	1.2487	24.8336
2008-08-26 04:19:15	2008-08-26 04:19:15	132.587	71.9237	1.256	24.8288
2008-08-26 04:27:14	2008-08-26 04:27:14	132.587	71.9238	1.2577	24.8295
2008-08-26 04:35:15	2008-08-26 04:35:15	132.587	71.9233	1.256	24.8215
2008-08-26 04:43:14	2008-08-26 04:43:14	132.587	71.9235	1.2409	24.8166
2008-08-26 04:51:15	2008-08-26 04:51:15	132.587	71.9239	1.2499	24.8189
2008-08-26 04:59:14	2008-08-26 04:59:14	132.587	71.9236	1.2629	24.808
2008-08-26 05:07:14	2008-08-26 05:07:14	132.587	71.9234	1.262	24.8048
2008-08-26 05:15:15	2008-08-26 05:15:15	132.587	71.9236	1.2791	24.7922
2008-08-26 05:23:14	2008-08-26 05:23:14	132.587	71.9238	1.2927	24.7891
2008-08-26 05:31:15	2008-08-26 05:31:15	132.587	71.9234	1.2931	24.7906
2008-08-26 05:39:14	2008-08-26 05:39:14	132.587	71.9236	1.2971	24.791
2008-08-26 05:47:15	2008-08-26 05:47:15	132.587	71.9239	1.3168	24.7958
2008-08-26 05:55:14	2008-08-26 05:55:14	132.587	71.9235	1.3199	24.7745
2008-08-26 06:03:15	2008-08-26 06:03:15	132.587	71.9235	1.3249	24.7938
2008-08-26 06:11:15	2008-08-26 06:11:15	132.587	71.9239	1.327	24.7931
2008-08-26 06:19:14	2008-08-26 06:19:14	132.587	71.9235	1.3322	24.806
2008-08-26 06:27:15	2008-08-26 06:27:15	132.587	71.9236	1.339	24.8074
2008-08-26 06:35:14	2008-08-26 06:35:14	132.587	71.9239	1.3462	24.8163
2008-08-26 06:43:15	2008-08-26 06:43:15	132.587	71.9235	1.3498	24.8304
2008-08-26 06:51:14	2008-08-26 06:51:14	132.587	71.9237	1.3522	24.8385
2008-08-26 06:59:15	2008-08-26 06:59:15	132.587	71.9235	1.3511	24.8842
2008-08-26 07:07:14	2008-08-26 07:07:14	132.587	71.9236	1.3275	24.9063
2008-08-26 07:15:15	2008-08-26 07:15:15	132.587	71.9236	1.4179	24.8356
2008-08-26 07:23:14	2008-08-26 07:23:14	132.592	71.9255	1.6388	24.5494
2008-08-26 07:31:14	2008-08-26 07:31:14	132.529	71.9273	1.7541	23.7728
2008-08-26 07:39:15	2008-08-26 07:39:15	132.457	71.9287	1.8715	22.4574
2008-08-26 07:47:14	2008-08-26 07:47:14	132.394	71.9289	1.9722	21.4194
2008-08-26 07:55:15	2008-08-26 07:55:15	132.387	71.9249	2.0521	20.6966
2008-08-26 08:03:14	2008-08-26 08:03:14	132.39	71.9229	2.0923	20.2173
2008-08-26 08:11:15	2008-08-26 08:11:15	132.392	71.9224	2.2866	19.4549
2008-08-26 08:19:14	2008-08-26 08:19:14	132.38	71.9221	2.5712	18.5883
2008-08-26 08:27:15	2008-08-26 08:27:15	132.31	71.9279	2.9618	17.5824
2008-08-26 08:35:14	2008-08-26 08:35:14	132.234	71.9336	3.2343	16.9293
2008-08-26 08:43:14	2008-08-26 08:43:14	132.158	71.9392	3.69	15.9565
2008-08-26 08:51:15	2008-08-26 08:51:15	132.081	71.9445	4.3969	14.4718
2008-08-26 08:59:14	2008-08-26 08:59:14	132.004	71.9502	5.3727	12.5076
2008-08-26 09:07:15	2008-08-26 09:07:15	131.924	71.9548	6.6847	9.5521
2008-08-26 09:15:14	2008-08-26 09:15:14	131.845	71.9595	7.498	7.6556
2008-08-26 09:23:15	2008-08-26 09:23:15	131.765	71.9643	8.0978	6.3066
2008-08-26 09:31:14	2008-08-26 09:31:14	131.722	71.9682	8.461	5.4505
2008-08-26 09:39:15	2008-08-26 09:39:15	131.716	71.9692	8.8388	4.7123
2008-08-26 09:47:14	2008-08-26 09:47:14	131.707	71.9699	9.0201	4.3683
2008-08-26 09:55:14	2008-08-26 09:55:14	131.698	71.9673	9.1792	4.0826
2008-08-26 10:03:15	2008-08-26 10:03:15	131.695	71.9657	9.3212	3.9004
2008-08-26 10:11:14	2008-08-26 10:11:14	131.692	71.9648	9.4047	3.7767
2008-08-26 10:19:15	2008-08-26 10:19:15	131.687	71.964	9.5313	3.6687
2008-08-26 10:27:14	2008-08-26 10:27:14	131.684	71.963	9.621	3.5945
2008-08-26 10:35:15	2008-08-26 10:35:15	131.679	71.9622	9.6829	3.5445
2008-08-26 10:43:14	2008-08-26 10:43:14	131.675	71.9612	9.7716	3.4954
2008-08-26 10:51:15	2008-08-26 10:51:15	131.671	71.9603	9.8106	3.4585
2008-08-26 10:59:14	2008-08-26 10:59:14	131.667	71.9594	9.8161	3.4235
2008-08-26 11:07:14	2008-08-26 11:07:14	131.663	71.9584	9.8051	3.4137
2008-08-26 11:15:15	2008-08-26 11:15:15	131.675	71.9655	9.7899	3.4707
2008-08-26 11:23:14	2008-08-26 11:23:14	131.719	71.9792	9.7656	3.5718
2008-08-26 11:31:15	2008-08-26 11:31:15	131.764	71.9933	9.6937	3.7847
2008-08-26 11:39:14	2008-08-26 11:39:14	131.786	72.0004	9.6317	3.9641
2008-08-26 11:47:15	2008-08-26 11:47:15	131.787	71.9993	9.6207	4.0384
2008-08-26 11:55:14	2008-08-26 11:55:14	131.785	71.9987	9.5714	4.1918
2008-08-26 12:03:15	2008-08-26 12:03:15	131.783	71.9976	9.5016	4.424
2008-08-26 12:11:15	2008-08-26 12:11:15	131.783	71.997	9.5105	4.4361
2008-08-26 12:19:14	2008-08-26 12:19:14	131.781	71.9964	9.4979	4.5156
2008-08-26 12:27:15	2008-08-26 12:27:15	131.78	71.9952	9.475	4.5878
2008-08-26 12:35:14	2008-08-26 12:35:14	131.779	71.9944	9.484	4.6264
2008-08-26 12:43:15	2008-08-26 12:43:15	131.777	71.9938	9.4673	4.7513
2008-08-26 12:51:14	2008-08-26 12:51:14	131.777	71.9925	9.3948	5.0257
2008-08-26 12:59:15	2008-08-26 12:59:15	131.776	71.9918	9.3461	5.2512
2008-08-26 13:07:14	2008-08-26 13:07:14	131.775	71.9912	9.3916	5.1494
2008-08-26 13:15:15	2008-08-26 13:15:15	131.774	71.9898	9.4568	4.824
2008-08-26 13:23:14	2008-08-26 13:23:14	131.777	71.9878	9.518	4.5337
2008-08-26 13:31:14	2008-08-26 13:31:14	131.77	71.9827	9.5193	4.368
2008-08-26 13:39:15	2008-08-26 13:39:15	131.754	71.9794	9.5217	4.2167
2008-08-26 13:47:14	2008-08-26 13:47:14	131.73	71.9747	9.5404	4.0584
2008-08-26 13:55:15	2008-08-26 13:55:15	131.716	71.9716	9.5476	3.9287
2008-08-26 14:03:14	2008-08-26 14:03:14	131.687	71.9662	9.573	3.8227
2008-08-26 14:11:15	2008-08-26 14:11:15	131.655	71.9601	9.6269	3.651
2008-08-26 14:19:14	2008-08-26 14:19:14	131.624	71.9542	9.6606	3.5391
2008-08-26 14:27:15	2008-08-26 14:27:15	131.594	71.948	9.7016	3.4515
2008-08-26 14:35:14	2008-08-26 14:35:14	131.565	71.9418	9.7885	3.3515
2008-08-26 14:43:14	2008-08-26 14:43:14	131.535	71.9358	9.8536	3.2635
2008-08-26 14:51:15	2008-08-26 14:51:15	131.506	71.9298	9.8422	3.1383
2008-08-26 14:59:14	2008-08-26 14:59:14	131.477	71.9237	9.8928	3.0483
2008-08-26 15:07:15	2008-08-26 15:07:15	131.447	71.9176	9.8981	3.1494
2008-08-26 15:15:14	2008-08-26 15:15:14	131.418	71.9116	9.9411	3.2859
2008-08-26 15:23:15	2008-08-26 15:23:15	131.39	71.9051	9.9987	3.3716
2008-08-26 15:31:14	2008-08-26 15:31:14	131.361	71.8986	10.0522	3.4297
2008-08-26 15:39:15	2008-08-26 15:39:15	131.332	71.8922	10.0861	3.4821
2008-08-26 15:47:14	2008-08-26 15:47:14	131.303	71.8859	10.1301	3.525
2008-08-26 15:55:14	2008-08-26 15:55:14	131.273	71.8797	10.1715	3.5555
2008-08-26 16:03:15	2008-08-26 16:03:15	131.243	71.8735	10.2198	3.5903
2008-08-26 16:11:14	2008-08-26 16:11:14	131.213	71.8672	10.2524	3.6567
2008-08-26 16:19:15	2008-08-26 16:19:15	131.184	71.8609	10.2935	3.726
2008-08-26 16:27:14	2008-08-26 16:27:14	131.154	71.8545	10.336	3.7756
2008-08-26 16:35:15	2008-08-26 16:35:15	131.125	71.848	10.3736	3.7799
2008-08-26 16:43:14	2008-08-26 16:43:14	131.096	71.8415	10.4118	3.7562
2008-08-26 16:51:15	2008-08-26 16:51:15	131.066	71.8349	10.4357	3.7409
2008-08-26 16:59:14	2008-08-26 16:59:14	131.036	71.8282	10.4808	3.7163
2008-08-26 17:07:14	2008-08-26 17:07:14	131.006	71.8215	10.5335	3.6858
2008-08-26 17:15:15	2008-08-26 17:15:15	130.976	71.8146	10.5694	3.62
2008-08-26 17:23:14	2008-08-26 17:23:14	130.946	71.8077	10.6019	3.5224
2008-08-26 17:31:15	2008-08-26 17:31:15	130.916	71.8012	10.6013	3.3551
2008-08-26 17:39:14	2008-08-26 17:39:14	130.885	71.7947	10.5799	3.2165
2008-08-26 17:47:15	2008-08-26 17:47:15	130.854	71.7883	10.5838	3.1306
2008-08-26 17:55:14	2008-08-26 17:55:14	130.833	71.7836	10.6111	3.0725
2008-08-26 18:03:15	2008-08-26 18:03:15	130.823	71.781	10.5999	2.9506
2008-08-26 18:11:15	2008-08-26 18:11:15	130.799	71.7754	10.5775	2.7935
2008-08-26 18:19:14	2008-08-26 18:19:14	130.736	71.7626	10.6649	2.7163
2008-08-26 18:27:15	2008-08-26 18:27:15	130.668	71.7482	11.0185	2.5278
2008-08-26 18:35:14	2008-08-26 18:35:14	130.6	71.7338	11.4649	2.2091
2008-08-26 18:43:15	2008-08-26 18:43:15	130.533	71.7187	11.8729	1.8664
2008-08-26 18:51:14	2008-08-26 18:51:14	130.466	71.7032	12.1208	1.4419
2008-08-26 18:59:15	2008-08-26 18:59:15	130.4	71.6875	12.3547	1.1225
2008-08-26 19:07:14	2008-08-26 19:07:14	130.333	71.6727	12.5268	0.8937
2008-08-26 19:15:15	2008-08-26 19:15:15	130.267	71.6577	12.6714	0.8151
2008-08-26 19:23:14	2008-08-26 19:23:14	130.2	71.6428	12.7718	0.7762
2008-08-26 19:31:14	2008-08-26 19:31:14	130.147	71.632	12.7798	0.6631
2008-08-26 19:39:15	2008-08-26 19:39:15	130.112	71.6288	12.6926	0.5297
2008-08-26 19:47:14	2008-08-26 19:47:14	130.058	71.6292	12.6511	0.4594
2008-08-26 19:55:15	2008-08-26 19:55:15	130.049	71.631	12.6931	0.4652
2008-08-26 20:03:14	2008-08-26 20:03:14	130.045	71.6305	12.7724	0.537
2008-08-26 20:11:15	2008-08-26 20:11:15	130.084	71.6306	12.8291	0.5783
2008-08-26 20:19:14	2008-08-26 20:19:14	130.155	71.6286	12.8435	0.5391
2008-08-26 20:27:15	2008-08-26 20:27:15	130.189	71.6132	12.8081	0.439
2008-08-26 20:35:14	2008-08-26 20:35:14	130.185	71.5879	12.7384	0.3596
2008-08-26 20:43:14	2008-08-26 20:43:14	130.181	71.5623	12.7732	0.3204
2008-08-26 20:51:15	2008-08-26 20:51:15	130.178	71.5365	12.7915	0.2918
2008-08-26 20:59:14	2008-08-26 20:59:14	130.175	71.5106	12.7611	0.304
2008-08-26 21:07:15	2008-08-26 21:07:15	130.179	71.4847	12.7448	0.9207
2008-08-26 21:15:14	2008-08-26 21:15:14	130.183	71.4591	12.6654	1.5958
2008-08-26 21:23:15	2008-08-26 21:23:15	130.184	71.4341	12.5236	1.9955
2008-08-26 21:31:14	2008-08-26 21:31:14	130.182	71.4196	12.4342	2.2057
2008-08-26 21:39:15	2008-08-26 21:39:15	130.168	71.4169	12.4744	2.306
2008-08-26 21:47:14	2008-08-26 21:47:14	130.128	71.4166	12.5727	2.1798
2008-08-26 21:55:14	2008-08-26 21:55:14	130.047	71.4183	12.7394	1.9406
2008-08-26 22:03:15	2008-08-26 22:03:15	129.966	71.4206	12.9468	1.6505
2008-08-26 22:11:14	2008-08-26 22:11:14	129.916	71.4387	13.0453	1.5302
2008-08-26 22:19:15	2008-08-26 22:19:15	129.865	71.4576	13.1033	1.5647
2008-08-26 22:27:14	2008-08-26 22:27:14	129.813	71.4758	13.0985	1.618
2008-08-26 22:35:15	2008-08-26 22:35:15	129.76	71.4944	13.0127	1.651
2008-08-26 22:43:14	2008-08-26 22:43:14	129.704	71.5125	13.0076	1.7074
2008-08-26 22:51:15	2008-08-26 22:51:15	129.651	71.5306	12.9421	1.6831
2008-08-26 22:59:14	2008-08-26 22:59:14	129.599	71.549	12.8737	1.6113
2008-08-26 23:07:14	2008-08-26 23:07:14	129.548	71.5678	12.8488	1.5351
2008-08-26 23:15:15	2008-08-26 23:15:15	129.496	71.5864	12.9702	1.2727
2008-08-26 23:23:14	2008-08-26 23:23:14	129.443	71.6048	13.1569	0.9884
2008-08-26 23:31:15	2008-08-26 23:31:15	129.389	71.623	13.2921	0.7691
2008-08-26 23:39:14	2008-08-26 23:39:14	129.337	71.6414	13.3965	0.5598
2008-08-26 23:47:15	2008-08-26 23:47:15	129.271	71.648	13.4616	0.4181
2008-08-26 23:55:14	2008-08-26 23:55:14	129.199	71.6443	13.481	0.3447
2008-08-27 00:03:15	2008-08-27 00:03:15	129.154	71.6422	13.4828	0.3219
2008-08-27 00:11:15	2008-08-27 00:11:15	129.111	71.6402	13.4659	0.3459
2008-08-27 00:19:14	2008-08-27 00:19:14	129.068	71.6384	13.4515	0.3965
2008-08-27 00:27:15	2008-08-27 00:27:15	129.021	71.636	13.4002	0.4812
2008-08-27 00:35:14	2008-08-27 00:35:14	128.976	71.643	13.2997	0.562
2008-08-27 00:43:15	2008-08-27 00:43:15	128.934	71.6493	13.115	0.6049
2008-08-27 00:51:14	2008-08-27 00:51:14	128.905	71.6461	13.0759	0.6341
2008-08-27 00:59:15	2008-08-27 00:59:15	128.905	71.6457	13.0967	0.6551
2008-08-27 01:07:14	2008-08-27 01:07:14	128.923	71.6502	13.1145	0.6706
2008-08-27 01:15:15	2008-08-27 01:15:15	128.945	71.653	13.1238	0.684
2008-08-27 01:23:14	2008-08-27 01:23:14	128.945	71.653	13.1615	0.6953
2008-08-27 01:31:14	2008-08-27 01:31:14	128.945	71.653	13.202	0.7026
2008-08-27 01:39:15	2008-08-27 01:39:15	128.944	71.6531	13.2528	0.7113
2008-08-27 01:47:14	2008-08-27 01:47:14	128.945	71.6531	13.3067	0.7192
2008-08-27 01:55:15	2008-08-27 01:55:15	128.944	71.6531	13.3427	0.7249
2008-08-27 02:03:14	2008-08-27 02:03:14	128.944	71.6531	13.3814	0.7308
2008-08-27 02:11:15	2008-08-27 02:11:15	128.944	71.6532	13.4168	0.7359
2008-08-27 02:19:14	2008-08-27 02:19:14	128.944	71.6531	13.444	0.7401
2008-08-27 02:27:15	2008-08-27 02:27:15	128.944	71.6532	13.4645	0.7435
2008-08-27 02:35:14	2008-08-27 02:35:14	128.944	71.6532	13.4769	0.7452
2008-08-27 02:43:14	2008-08-27 02:43:14	128.944	71.6532	13.4851	0.7462
2008-08-27 02:51:15	2008-08-27 02:51:15	128.944	71.6531	13.4936	0.7459
2008-08-27 02:59:14	2008-08-27 02:59:14	128.944	71.6531	13.498	0.7452
2008-08-27 03:07:15	2008-08-27 03:07:15	128.945	71.6531	13.5074	0.7448
2008-08-27 03:15:14	2008-08-27 03:15:14	128.944	71.6531	13.5052	0.7447
2008-08-27 03:23:15	2008-08-27 03:23:15	128.944	71.6531	13.4848	0.7443
2008-08-27 03:31:14	2008-08-27 03:31:14	128.944	71.6531	13.4759	0.7425
2008-08-27 03:39:15	2008-08-27 03:39:15	128.944	71.6532	13.4145	0.7383
2008-08-27 03:47:14	2008-08-27 03:47:14	128.945	71.6531	13.3524	0.7311
2008-08-27 03:55:14	2008-08-27 03:55:14	128.946	71.6533	13.2937	0.729
2008-08-27 04:03:15	2008-08-27 04:03:15	128.944	71.6537	13.2233	0.721
2008-08-27 04:11:14	2008-08-27 04:11:14	128.925	71.6502	13.056	0.7115
2008-08-27 04:19:15	2008-08-27 04:19:15	128.904	71.646	12.8982	0.7021
2008-08-27 04:27:14	2008-08-27 04:27:14	128.897	71.6449	12.7873	0.6961
2008-08-27 04:35:15	2008-08-27 04:35:15	128.897	71.6449	12.7273	0.6929
2008-08-27 04:43:14	2008-08-27 04:43:14	128.897	71.6449	12.6884	0.6908
2008-08-27 04:51:15	2008-08-27 04:51:15	128.897	71.6449	12.675	0.689
2008-08-27 04:59:14	2008-08-27 04:59:14	128.897	71.6449	12.6899	0.6875
2008-08-27 05:07:14	2008-08-27 05:07:14	128.897	71.6449	12.7094	0.6859
2008-08-27 05:15:15	2008-08-27 05:15:15	128.897	71.6449	12.7273	0.6839
2008-08-27 05:23:14	2008-08-27 05:23:14	128.897	71.6449	12.7452	0.6823
2008-08-27 05:31:15	2008-08-27 05:31:15	128.897	71.6449	12.7612	0.681
2008-08-27 05:39:14	2008-08-27 05:39:14	128.897	71.6449	12.7814	0.6799
2008-08-27 05:47:15	2008-08-27 05:47:15	128.897	71.6449	12.8363	0.6726
2008-08-27 05:55:14	2008-08-27 05:55:14	128.897	71.6449	12.8785	0.6681
2008-08-27 06:03:15	2008-08-27 06:03:15	128.897	71.6449	12.9083	0.6632
2008-08-27 06:11:15	2008-08-27 06:11:15	128.897	71.6449	12.9714	0.6533
2008-08-27 06:19:14	2008-08-27 06:19:14	128.897	71.6449	13.0177	0.6468
2008-08-27 06:27:15	2008-08-27 06:27:15	128.897	71.6449	13.0118	0.6462
2008-08-27 06:35:14	2008-08-27 06:35:14	128.897	71.6449	13.021	0.6428
2008-08-27 06:43:15	2008-08-27 06:43:15	128.897	71.6449	13.0396	0.6369
2008-08-27 06:51:14	2008-08-27 06:51:14	128.897	71.6449	13.016	0.6392
2008-08-27 06:59:15	2008-08-27 06:59:15	128.897	71.6449	13.0091	0.6393
2008-08-27 07:07:14	2008-08-27 07:07:14	128.897	71.6449	12.9723	0.6432
2008-08-27 07:15:15	2008-08-27 07:15:15	128.897	71.6449	12.9512	0.6425
2008-08-27 07:23:14	2008-08-27 07:23:14	128.897	71.6449	12.9359	0.6435
2008-08-27 07:31:14	2008-08-27 07:31:14	128.897	71.6449	12.9423	0.6416
2008-08-27 07:39:15	2008-08-27 07:39:15	128.897	71.6449	12.9402	0.6428
2008-08-27 07:47:14	2008-08-27 07:47:14	128.897	71.6449	12.9367	0.6443
2008-08-27 07:55:15	2008-08-27 07:55:15	128.897	71.6449	12.9272	0.6461
2008-08-27 08:03:14	2008-08-27 08:03:14	128.897	71.6449	12.9194	0.6483
2008-08-27 08:11:15	2008-08-27 08:11:15	128.897	71.6449	12.9248	0.6477
2008-08-27 08:19:14	2008-08-27 08:19:14	128.897	71.6449	12.9136	0.6499
2008-08-27 08:27:15	2008-08-27 08:27:15	128.897	71.6449	12.9205	0.6484
2008-08-27 08:35:14	2008-08-27 08:35:14	128.897	71.6449	12.932	0.6472
2008-08-27 08:43:14	2008-08-27 08:43:14	128.897	71.6449	12.9435	0.6475
2008-08-27 08:51:15	2008-08-27 08:51:15	128.897	71.6449	12.9533	0.6501
2008-08-27 08:59:14	2008-08-27 08:59:14	128.897	71.6449	12.9439	0.6534
2008-08-27 09:07:15	2008-08-27 09:07:15	128.897	71.6449	12.9385	0.6557
2008-08-27 09:15:14	2008-08-27 09:15:14	128.897	71.6449	12.9244	0.6567
2008-08-27 09:23:15	2008-08-27 09:23:15	128.897	71.6449	12.91	0.6575
2008-08-27 09:31:14	2008-08-27 09:31:14	128.897	71.6449	12.8971	0.6577
2008-08-27 09:39:15	2008-08-27 09:39:15	128.897	71.6449	12.8803	0.6578
2008-08-27 09:47:14	2008-08-27 09:47:14	128.897	71.6449	12.8658	0.6583
2008-08-27 09:55:14	2008-08-27 09:55:14	128.897	71.6449	12.8521	0.6587
2008-08-27 10:03:15	2008-08-27 10:03:15	128.897	71.6449	12.8442	0.6593
2008-08-27 10:11:14	2008-08-27 10:11:14	128.897	71.6449	12.8358	0.6599
2008-08-27 10:19:15	2008-08-27 10:19:15	128.897	71.6449	12.8276	0.6604
2008-08-27 10:27:14	2008-08-27 10:27:14	128.897	71.6449	12.8231	0.6608
2008-08-27 10:35:15	2008-08-27 10:35:15	128.897	71.6449	12.8147	0.661
2008-08-27 10:43:14	2008-08-27 10:43:14	128.897	71.6449	12.8152	0.6601
2008-08-27 10:51:15	2008-08-27 10:51:15	128.897	71.6449	12.8001	0.66
2008-08-27 10:59:14	2008-08-27 10:59:14	128.897	71.6449	12.7895	0.6599
2008-08-27 11:07:14	2008-08-27 11:07:14	128.897	71.6449	12.782	0.6597
2008-08-27 11:15:15	2008-08-27 11:15:15	128.897	71.6449	12.7749	0.6596
2008-08-27 11:23:14	2008-08-27 11:23:14	128.897	71.6449	12.7675	0.6592
2008-08-27 11:31:15	2008-08-27 11:31:15	128.897	71.6449	12.7615	0.6584
2008-08-27 11:39:14	2008-08-27 11:39:14	128.897	71.6449	12.7582	0.6578
2008-08-27 11:47:15	2008-08-27 11:47:15	128.897	71.6449	12.7582	0.6574
2008-08-27 11:55:14	2008-08-27 11:55:14	128.897	71.6449	12.7586	0.6568
2008-08-27 12:03:15	2008-08-27 12:03:15	128.897	71.6449	12.7606	0.6562
2008-08-27 12:11:15	2008-08-27 12:11:15	128.897	71.6449	12.7586	0.6559
2008-08-27 12:19:14	2008-08-27 12:19:14	128.897	71.6449	12.7577	0.6553
2008-08-27 12:27:15	2008-08-27 12:27:15	128.897	71.6449	12.7595	0.6553
2008-08-27 12:35:14	2008-08-27 12:35:14	128.897	71.6449	12.7602	0.6556
2008-08-27 12:43:15	2008-08-27 12:43:15	128.897	71.6449	12.7634	0.6562
2008-08-27 12:51:14	2008-08-27 12:51:14	128.897	71.6449	12.767	0.6563
2008-08-27 12:59:15	2008-08-27 12:59:15	128.897	71.6449	12.7669	0.6564
2008-08-27 13:07:14	2008-08-27 13:07:14	128.897	71.6449	12.767	0.6562
2008-08-27 13:15:15	2008-08-27 13:15:15	128.897	71.6449	12.7689	0.6562
2008-08-27 13:23:14	2008-08-27 13:23:14	128.897	71.6449	12.7722	0.6561
2008-08-27 13:31:14	2008-08-27 13:31:14	128.897	71.6449	12.7726	0.6562
2008-08-27 13:39:15	2008-08-27 13:39:15	128.897	71.6449	12.7724	0.6562
2008-08-27 13:47:14	2008-08-27 13:47:14	128.897	71.6449	12.7733	0.6561
2008-08-27 13:55:15	2008-08-27 13:55:15	128.897	71.6449	12.7717	0.656
2008-08-27 14:03:14	2008-08-27 14:03:14	128.897	71.6449	12.7694	0.656
2008-08-27 14:11:15	2008-08-27 14:11:15	128.897	71.6449	12.757	0.654
2008-08-27 14:19:14	2008-08-27 14:19:14	128.897	71.6449	12.699	0.6514
2008-08-27 14:27:15	2008-08-27 14:27:15	128.897	71.6449	12.7456	0.6477
2008-08-27 14:35:14	2008-08-27 14:35:14	128.897	71.6449	12.8754	0.6536
2008-08-27 14:43:14	2008-08-27 14:43:14	128.897	71.6449	13.0732	0.62
2008-08-27 14:51:15	2008-08-27 14:51:15	128.897	71.6449	13.3081	0.5699
2008-08-27 14:59:14	2008-08-27 14:59:14	128.897	71.6449	13.5041	0.4968
2008-08-27 15:07:15	2008-08-27 15:07:15	128.897	71.6449	13.5812	0.4295
2008-08-27 15:15:14	2008-08-27 15:15:14	128.897	71.6449	13.63	0.3475
2008-08-27 15:23:15	2008-08-27 15:23:15	128.897	71.6449	13.6372	0.3048
2008-08-27 15:31:14	2008-08-27 15:31:14	128.897	71.6449	13.5565	0.2683
2008-08-27 15:39:15	2008-08-27 15:39:15	128.897	71.6449	13.4466	0.3318
2008-08-27 15:47:14	2008-08-27 15:47:14	128.897	71.6449	13.2969	0.6544
2008-08-27 15:55:14	2008-08-27 15:55:14	128.897	71.6449	13.1811	1.0118
2008-08-27 16:03:15	2008-08-27 16:03:15	128.897	71.6449	13.0747	1.1715
2008-08-27 16:11:14	2008-08-27 16:11:14	128.897	71.6449	13.0217	1.2335
2008-08-27 16:19:15	2008-08-27 16:19:15	128.897	71.6449	13.012	1.261
2008-08-27 16:27:14	2008-08-27 16:27:14	128.897	71.6449	13.0818	1.3332
2008-08-27 16:35:15	2008-08-27 16:35:15	128.897	71.6449	13.1339	1.2621
2008-08-27 16:43:14	2008-08-27 16:43:14	128.897	71.6449	13.177	1.0637
2008-08-27 16:51:15	2008-08-27 16:51:15	128.897	71.6449	13.2113	0.8442
2008-08-27 16:59:14	2008-08-27 16:59:14	128.897	71.6449	13.2872	0.6847
2008-08-27 17:07:14	2008-08-27 17:07:14	128.897	71.6449	13.2841	0.5599
2008-08-27 17:15:15	2008-08-27 17:15:15	128.897	71.6449	13.2318	0.5154
2008-08-27 17:23:14	2008-08-27 17:23:14	128.897	71.6449	13.1974	0.5218
2008-08-27 17:31:15	2008-08-27 17:31:15	130.168	71.4165	13.1628	0.5264
2008-08-27 17:39:14	2008-08-27 17:39:14	130.17	71.4154	13.1293	0.5195
2008-08-27 17:47:15	2008-08-27 17:47:15	130.179	71.4151	13.1226	0.5156
2008-08-27 17:55:14	2008-08-27 17:55:14	130.184	71.4342	13.0144	0.849
2008-08-27 18:03:15	2008-08-27 18:03:15	130.188	71.457	12.9448	0.8478
2008-08-27 18:11:15	2008-08-27 18:11:15	130.191	71.4801	12.8693	0.8139
2008-08-27 18:19:14	2008-08-27 18:19:14	130.193	71.503	12.8013	0.8215
2008-08-27 18:27:15	2008-08-27 18:27:15	130.193	71.5259	12.7736	0.8622
2008-08-27 18:35:14	2008-08-27 18:35:14	130.193	71.5487	12.772	0.8258
2008-08-27 18:43:15	2008-08-27 18:43:15	130.192	71.5714	12.7435	0.8245
2008-08-27 18:51:14	2008-08-27 18:51:14	130.175	71.5923	12.7165	0.8346
2008-08-27 18:59:15	2008-08-27 18:59:15	130.131	71.6068	12.6627	0.8773
2008-08-27 19:07:14	2008-08-27 19:07:14	130.099	71.6172	12.6345	0.9097
2008-08-27 19:15:15	2008-08-27 19:15:15	130.071	71.6251	12.6196	0.9215
2008-08-27 19:23:14	2008-08-27 19:23:14	130.046	71.6329	12.6006	0.9336
2008-08-27 19:31:14	2008-08-27 19:31:14	130.042	71.6334	12.5941	0.9372
2008-08-27 19:39:15	2008-08-27 19:39:15	130.049	71.6306	12.5943	0.9346
2008-08-27 19:47:14	2008-08-27 19:47:14	130.052	71.6294	12.5936	0.9246
2008-08-27 19:55:15	2008-08-27 19:55:15	130.054	71.6287	12.59	0.9021
2008-08-27 20:03:14	2008-08-27 20:03:14	130.054	71.628	12.5822	0.8805
2008-08-27 20:11:15	2008-08-27 20:11:15	130.056	71.6277	12.5651	0.8577
2008-08-27 20:19:14	2008-08-27 20:19:14	130.056	71.6278	12.5574	0.8329
2008-08-27 20:27:15	2008-08-27 20:27:15	130.056	71.6278	12.5505	0.81
2008-08-27 20:35:14	2008-08-27 20:35:14	130.056	71.6278	12.5625	0.7952
2008-08-27 20:43:14	2008-08-27 20:43:14	130.056	71.6278	12.5837	0.7841
2008-08-27 20:51:15	2008-08-27 20:51:15	130.056	71.6278	12.5836	0.7802
2008-08-27 20:59:14	2008-08-27 20:59:14	130.056	71.6278	12.5939	0.7812
2008-08-27 21:07:15	2008-08-27 21:07:15	130.056	71.6278	12.5971	0.7874
2008-08-27 21:15:14	2008-08-27 21:15:14	130.056	71.6278	12.5909	0.7973
2008-08-27 21:23:15	2008-08-27 21:23:15	130.056	71.6278	12.582	0.8109
2008-08-27 21:31:14	2008-08-27 21:31:14	130.056	71.6278	12.5714	0.8146
2008-08-27 21:39:15	2008-08-27 21:39:15	130.056	71.6278	12.5698	0.8052
2008-08-27 21:47:14	2008-08-27 21:47:14	130.056	71.6278	12.567	0.7919
2008-08-27 21:55:14	2008-08-27 21:55:14	130.056	71.6278	12.5576	0.7787
2008-08-27 22:03:15	2008-08-27 22:03:15	130.056	71.6278	12.5542	0.7612
2008-08-27 22:11:14	2008-08-27 22:11:14	130.056	71.6278	12.5476	0.7403
2008-08-27 22:19:15	2008-08-27 22:19:15	130.056	71.6278	12.5476	0.7224
2008-08-27 22:27:14	2008-08-27 22:27:14	130.056	71.6277	12.5623	0.7036
2008-08-27 22:35:15	2008-08-27 22:35:15	130.056	71.6278	12.5773	0.6862
2008-08-27 22:43:14	2008-08-27 22:43:14	130.056	71.6278	12.5947	0.6687
2008-08-27 22:51:15	2008-08-27 22:51:15	130.056	71.6278	12.6332	0.655
2008-08-27 22:59:14	2008-08-27 22:59:14	130.055	71.6278	12.6539	0.6474
2008-08-27 23:07:14	2008-08-27 23:07:14	130.056	71.6278	12.6947	0.6415
2008-08-27 23:15:15	2008-08-27 23:15:15	130.055	71.6278	12.7251	0.6405
2008-08-27 23:23:14	2008-08-27 23:23:14	130.056	71.6279	12.732	0.6438
2008-08-27 23:31:15	2008-08-27 23:31:15	130.056	71.6278	12.7161	0.6497
2008-08-27 23:39:14	2008-08-27 23:39:14	130.056	71.6279	12.6919	0.6528
2008-08-27 23:47:15	2008-08-27 23:47:15	130.056	71.6278	12.6631	0.6507
2008-08-27 23:55:14	2008-08-27 23:55:14	130.056	71.6278	12.651	0.6469
2008-08-28 00:03:15	2008-08-28 00:03:15	130.056	71.6277	12.6614	0.6439
2008-08-28 00:11:15	2008-08-28 00:11:15	130.055	71.6278	12.6694	0.642
2008-08-28 00:19:14	2008-08-28 00:19:14	130.055	71.6278	12.6733	0.642
2008-08-28 00:27:15	2008-08-28 00:27:15	130.055	71.6277	12.6777	0.6448
2008-08-28 00:35:14	2008-08-28 00:35:14	130.055	71.6277	12.681	0.6512
2008-08-28 00:43:15	2008-08-28 00:43:15	130.055	71.6277	12.6691	0.6615
2008-08-28 00:51:14	2008-08-28 00:51:14	130.055	71.6277	12.659	0.6776
2008-08-28 00:59:15	2008-08-28 00:59:15	130.055	71.6277	12.6446	0.6941
2008-08-28 01:07:14	2008-08-28 01:07:14	130.055	71.6277	12.6284	0.7071
2008-08-28 01:15:15	2008-08-28 01:15:15	130.055	71.6277	12.6176	0.7173
2008-08-28 01:23:14	2008-08-28 01:23:14	130.055	71.6277	12.6049	0.7236
2008-08-28 01:31:14	2008-08-28 01:31:14	130.055	71.6277	12.6038	0.7312
2008-08-28 01:39:15	2008-08-28 01:39:15	130.055	71.6277	12.6	0.7336
2008-08-28 01:47:14	2008-08-28 01:47:14	130.055	71.6277	12.6064	0.7309
2008-08-28 01:55:15	2008-08-28 01:55:15	130.055	71.6277	12.6063	0.7236
2008-08-28 02:03:14	2008-08-28 02:03:14	130.055	71.6277	12.6278	0.7199
2008-08-28 02:11:15	2008-08-28 02:11:15	130.055	71.6277	12.6194	0.7224
2008-08-28 02:19:14	2008-08-28 02:19:14	130.056	71.6277	12.6602	0.7112
2008-08-28 02:27:15	2008-08-28 02:27:15	130.056	71.6277	12.6563	0.7056
2008-08-28 02:35:14	2008-08-28 02:35:14	130.055	71.6277	12.6584	0.7053
2008-08-28 02:43:14	2008-08-28 02:43:14	130.055	71.6277	12.6895	0.6889
2008-08-28 02:51:15	2008-08-28 02:51:15	130.056	71.6277	12.7081	0.6963
2008-08-28 02:59:14	2008-08-28 02:59:14	130.055	71.6291	12.6781	0.7212
2008-08-28 03:07:15	2008-08-28 03:07:15	130.034	71.6364	12.6727	0.7578
2008-08-28 03:15:14	2008-08-28 03:15:14	130.052	71.6431	12.6349	0.7817
2008-08-28 03:23:15	2008-08-28 03:23:15	130.088	71.6417	12.5695	0.8346
2008-08-28 03:31:14	2008-08-28 03:31:14	130.123	71.6292	12.0292	1.6748
2008-08-28 03:39:15	2008-08-28 03:39:15	130.157	71.6165	11.7371	2.1306
2008-08-28 03:47:14	2008-08-28 03:47:14	130.195	71.6041	11.756	2.0514
2008-08-28 03:55:14	2008-08-28 03:55:14	130.239	71.5917	11.8678	1.8539
2008-08-28 04:03:15	2008-08-28 04:03:15	130.255	71.5835	11.9925	1.6387
2008-08-28 04:11:14	2008-08-28 04:11:14	130.257	71.5816	12.1392	1.4591
2008-08-28 04:19:15	2008-08-28 04:19:15	130.259	71.58	12.2989	1.3316
2008-08-28 04:27:14	2008-08-28 04:27:14	130.259	71.5788	12.381	1.2085
2008-08-28 04:35:15	2008-08-28 04:35:15	130.259	71.5788	12.4248	1.1125
2008-08-28 04:43:14	2008-08-28 04:43:14	130.259	71.5788	12.4685	1.0375
2008-08-28 04:51:15	2008-08-28 04:51:15	130.259	71.5788	12.5049	0.9748
2008-08-28 04:59:14	2008-08-28 04:59:14	130.259	71.5788	12.5313	0.9378
2008-08-28 05:07:14	2008-08-28 05:07:14	130.259	71.5788	12.5201	0.9303
2008-08-28 05:15:15	2008-08-28 05:15:15	130.259	71.5788	12.4831	0.9779
2008-08-28 05:23:14	2008-08-28 05:23:14	130.259	71.5788	12.3447	1.086
2008-08-28 05:31:15	2008-08-28 05:31:15	130.259	71.5791	12.2636	1.1896
2008-08-28 05:39:14	2008-08-28 05:39:14	130.271	71.5872	12.2235	1.2831
2008-08-28 05:47:15	2008-08-28 05:47:15	130.293	71.6044	12.2004	1.3635
2008-08-28 05:55:14	2008-08-28 05:55:14	130.311	71.6186	12.1798	1.4459
2008-08-28 06:03:15	2008-08-28 06:03:15	130.317	71.6271	12.1557	1.5284
2008-08-28 06:11:15	2008-08-28 06:11:15	130.321	71.6268	12.1153	1.6109
2008-08-28 06:19:14	2008-08-28 06:19:14	130.324	71.6263	12.0578	1.6935
2008-08-28 06:27:15	2008-08-28 06:27:15	130.325	71.6265	12.0238	1.7434
2008-08-28 06:35:14	2008-08-28 06:35:14	130.325	71.6265	11.9687	1.8131
2008-08-28 06:43:15	2008-08-28 06:43:15	130.325	71.6265	11.9001	1.8584
2008-08-28 06:51:14	2008-08-28 06:51:14	130.325	71.6265	11.9456	1.7211
2008-08-28 06:59:15	2008-08-28 06:59:15	130.325	71.6266	12.2366	1.439
2008-08-28 07:07:14	2008-08-28 07:07:14	130.325	71.6265	12.4676	1.2258
2008-08-28 07:15:15	2008-08-28 07:15:15	130.325	71.6265	12.6017	1.0565
2008-08-28 07:23:14	2008-08-28 07:23:14	130.325	71.6266	12.6957	0.9291
2008-08-28 07:31:14	2008-08-28 07:31:14	130.315	71.6268	12.7636	0.8502
2008-08-28 07:39:15	2008-08-28 07:39:15	130.271	71.6285	12.7982	0.79
2008-08-28 07:47:14	2008-08-28 07:47:14	130.224	71.6286	12.8217	0.7553
2008-08-28 07:55:15	2008-08-28 07:55:15	130.187	71.6286	12.8636	0.7303
2008-08-28 08:03:14	2008-08-28 08:03:14	130.191	71.63	12.896	0.7176
2008-08-28 08:11:15	2008-08-28 08:11:15	130.199	71.6295	12.9086	0.7095
2008-08-28 08:19:14	2008-08-28 08:19:14	130.207	71.6286	12.9183	0.7029
2008-08-28 08:27:15	2008-08-28 08:27:15	130.215	71.6275	12.9176	0.6989
2008-08-28 08:35:14	2008-08-28 08:35:14	130.221	71.627	12.8852	0.6983
2008-08-28 08:43:14	2008-08-28 08:43:14	130.221	71.6271	12.8697	0.7002
2008-08-28 08:51:15	2008-08-28 08:51:15	130.221	71.6271	12.8197	0.7248
2008-08-28 08:59:14	2008-08-28 08:59:14	130.221	71.6271	12.7689	0.7623
2008-08-28 09:07:15	2008-08-28 09:07:15	130.221	71.6271	12.7689	0.7582
2008-08-28 09:15:14	2008-08-28 09:15:14	130.221	71.6271	12.759	0.704
2008-08-28 09:23:15	2008-08-28 09:23:15	130.221	71.6271	12.736	0.6481
2008-08-28 09:31:14	2008-08-28 09:31:14	130.221	71.6271	12.7019	0.6015
2008-08-28 09:39:15	2008-08-28 09:39:15	130.22	71.6273	12.6544	0.5572
2008-08-28 09:47:14	2008-08-28 09:47:14	130.186	71.6276	12.6358	0.5388
2008-08-28 09:55:14	2008-08-28 09:55:14	130.134	71.6292	12.6038	0.5863
2008-08-28 10:03:15	2008-08-28 10:03:15	130.09	71.6292	12.5258	0.7321
2008-08-28 10:11:14	2008-08-28 10:11:14	130.057	71.6311	12.372	0.9992
2008-08-28 10:19:15	2008-08-28 10:19:15	130.072	71.6333	12.0564	1.3812
2008-08-28 10:27:14	2008-08-28 10:27:14	130.091	71.6374	11.7551	1.7644
2008-08-28 10:35:15	2008-08-28 10:35:15	130.116	71.6425	11.3768	2.1503
2008-08-28 10:43:14	2008-08-28 10:43:14	130.142	71.6473	11.1606	2.3397
2008-08-28 10:51:15	2008-08-28 10:51:15	130.166	71.6521	10.9106	2.5839
2008-08-28 10:59:14	2008-08-28 10:59:14	130.192	71.6576	10.8244	2.7133
2008-08-28 11:07:14	2008-08-28 11:07:14	130.223	71.6638	10.76	2.8196
2008-08-28 11:15:15	2008-08-28 11:15:15	130.253	71.6698	10.7872	2.8404
2008-08-28 11:23:14	2008-08-28 11:23:14	130.283	71.6755	10.8123	2.9113
2008-08-28 11:31:15	2008-08-28 11:31:15	130.311	71.6813	10.9227	3.0238
2008-08-28 11:39:14	2008-08-28 11:39:14	130.339	71.6871	11.1196	3.0774
2008-08-28 11:47:15	2008-08-28 11:47:15	130.368	71.6927	11.2273	3.1502
2008-08-28 11:55:14	2008-08-28 11:55:14	130.398	71.6987	11.2103	3.1965
2008-08-28 12:03:15	2008-08-28 12:03:15	130.428	71.7049	11.0904	3.2557
2008-08-28 12:11:15	2008-08-28 12:11:15	130.458	71.7109	10.9891	3.2838
2008-08-28 12:19:14	2008-08-28 12:19:14	130.488	71.7172	10.9252	3.3258
2008-08-28 12:27:15	2008-08-28 12:27:15	130.519	71.7235	10.9027	3.3858
2008-08-28 12:35:14	2008-08-28 12:35:14	130.55	71.7297	10.8801	3.4599
2008-08-28 12:43:15	2008-08-28 12:43:15	130.581	71.7356	10.8616	3.478
2008-08-28 12:51:14	2008-08-28 12:51:14	130.611	71.7415	10.8543	3.4371
2008-08-28 12:59:15	2008-08-28 12:59:15	130.641	71.7474	10.8726	3.3237
2008-08-28 13:07:14	2008-08-28 13:07:14	130.671	71.7533	10.831	3.206
2008-08-28 13:15:15	2008-08-28 13:15:15	130.7	71.7592	10.7717	3.1236
2008-08-28 13:23:14	2008-08-28 13:23:14	130.73	71.765	10.8123	2.9935
2008-08-28 13:31:14	2008-08-28 13:31:14	130.76	71.7709	10.7667	2.9607
2008-08-28 13:39:15	2008-08-28 13:39:15	130.79	71.7768	10.7062	3.0608
2008-08-28 13:47:14	2008-08-28 13:47:14	130.818	71.7821	10.5711	3.172
2008-08-28 13:55:15	2008-08-28 13:55:15	130.83	71.784	10.5046	3.0839
2008-08-28 14:03:14	2008-08-28 14:03:14	130.844	71.7874	10.4859	3.0327
2008-08-28 14:11:15	2008-08-28 14:11:15	130.874	71.7931	10.4462	3.0835
2008-08-28 14:19:14	2008-08-28 14:19:14	130.931	71.8053	10.3457	3.1766
2008-08-28 14:27:15	2008-08-28 14:27:15	130.996	71.8193	10.2382	3.2385
2008-08-28 14:35:14	2008-08-28 14:35:14	131.061	71.8334	10.1677	3.3262
2008-08-28 14:43:14	2008-08-28 14:43:14	131.127	71.8475	10.0188	3.4855
2008-08-28 14:51:15	2008-08-28 14:51:15	131.194	71.8613	9.9558	3.5982
2008-08-28 14:59:14	2008-08-28 14:59:14	131.261	71.8749	9.8801	3.8142
2008-08-28 15:07:15	2008-08-28 15:07:15	131.329	71.8882	9.816	4.0576
2008-08-28 15:15:14	2008-08-28 15:15:14	131.396	71.9018	9.8269	4.2859
2008-08-28 15:23:15	2008-08-28 15:23:15	131.463	71.9153	9.6777	4.8205
2008-08-28 15:31:14	2008-08-28 15:31:14	131.532	71.9286	9.5912	5.1306
2008-08-28 15:39:15	2008-08-28 15:39:15	131.601	71.9414	9.57	5.1693
2008-08-28 15:47:14	2008-08-28 15:47:14	131.673	71.9533	9.5984	5.1702
2008-08-28 15:55:14	2008-08-28 15:55:14	131.725	71.9619	9.6965	5.2035
2008-08-28 16:03:15	2008-08-28 16:03:15	131.724	71.9685	9.7088	5.3442
2008-08-28 16:11:14	2008-08-28 16:11:14	131.717	71.9687	9.6769	5.586
2008-08-28 16:19:15	2008-08-28 16:19:15	131.767	71.9636	9.4622	6.0876
2008-08-28 16:27:14	2008-08-28 16:27:14	131.846	71.9596	9.324	6.2982
2008-08-28 16:35:15	2008-08-28 16:35:15	131.927	71.9561	9.5326	5.6866
2008-08-28 16:43:14	2008-08-28 16:43:14	132.008	71.9521	9.7744	4.8208
2008-08-28 16:51:15	2008-08-28 16:51:15	132.09	71.9477	9.9539	4.234
2008-08-28 16:59:14	2008-08-28 16:59:14	132.171	71.9435	10.0751	3.7477
2008-08-28 17:07:14	2008-08-28 17:07:14	132.252	71.9396	10.1477	3.4643
2008-08-28 17:15:15	2008-08-28 17:15:15	132.333	71.9361	10.2217	3.2193
2008-08-28 17:23:14	2008-08-28 17:23:14	132.416	71.9323	10.2599	3.0757
2008-08-28 17:31:15	2008-08-28 17:31:15	132.499	71.9301	10.2938	2.9744
2008-08-28 17:39:14	2008-08-28 17:39:14	132.564	71.9293	10.3107	2.9357
2008-08-28 17:47:15	2008-08-28 17:47:15	132.587	71.9234	10.2138	3.2024
2008-08-28 17:55:14	2008-08-28 17:55:14	132.599	71.9208	9.9163	4.2098
2008-08-28 18:03:15	2008-08-28 18:03:15	132.588	71.9283	9.5247	5.4362
2008-08-28 18:11:15	2008-08-28 18:11:15	132.579	71.9504	8.8684	7.2526
2008-08-28 18:19:14	2008-08-28 18:19:14	132.551	71.967	8.147	9.2518
2008-08-28 18:27:15	2008-08-28 18:27:15	132.53	71.9774	7.6886	10.4952
2008-08-28 18:35:14	2008-08-28 18:35:14	132.509	71.9976	7.2509	11.7028
2008-08-28 18:43:15	2008-08-28 18:43:15	132.487	72.0199	6.912	12.5799
2008-08-28 18:51:14	2008-08-28 18:51:14	132.464	72.0419	6.4845	13.6292
2008-08-28 18:59:15	2008-08-28 18:59:15	132.444	72.0639	6.1183	14.429
2008-08-28 19:07:14	2008-08-28 19:07:14	132.466	72.088	5.9123	14.7343
2008-08-28 19:15:15	2008-08-28 19:15:15	132.489	72.1122	5.8646	14.725
2008-08-28 19:23:14	2008-08-28 19:23:14	132.514	72.1361	5.9691	14.4841
2008-08-28 19:31:14	2008-08-28 19:31:14	132.54	72.16	6.1434	14.1316
2008-08-28 19:39:15	2008-08-28 19:39:15	132.565	72.184	6.2529	14.0975
2008-08-28 19:47:14	2008-08-28 19:47:14	132.589	72.208	6.3395	13.9858
2008-08-28 19:55:15	2008-08-28 19:55:15	132.613	72.2318	7.006	12.7074
2008-08-28 20:03:14	2008-08-28 20:03:14	132.636	72.256	7.9204	11.0843
2008-08-28 20:11:15	2008-08-28 20:11:15	132.659	72.2804	8.4854	10.2526
2008-08-28 20:19:14	2008-08-28 20:19:14	132.683	72.3043	8.9757	9.6141
2008-08-28 20:27:15	2008-08-28 20:27:15	132.707	72.328	9.3495	9.1456
2008-08-28 20:35:14	2008-08-28 20:35:14	132.728	72.3511	9.6682	8.7984
2008-08-28 20:43:14	2008-08-28 20:43:14	132.755	72.3728	9.8978	8.5861
2008-08-28 20:51:15	2008-08-28 20:51:15	132.781	72.3944	9.9596	8.493
2008-08-28 20:59:14	2008-08-28 20:59:14	132.804	72.4164	9.9419	8.5197
2008-08-28 21:07:15	2008-08-28 21:07:15	132.826	72.4382	9.8286	8.7799
2008-08-28 21:15:14	2008-08-28 21:15:14	132.847	72.4596	9.6407	9.2398
2008-08-28 21:23:15	2008-08-28 21:23:15	132.867	72.4811	9.4535	9.6237
2008-08-28 21:31:14	2008-08-28 21:31:14	132.888	72.503	9.3266	9.8781
2008-08-28 21:39:15	2008-08-28 21:39:15	132.908	72.5246	9.3252	9.9346
2008-08-28 21:47:14	2008-08-28 21:47:14	132.929	72.5462	9.347	10.0126
2008-08-28 21:55:14	2008-08-28 21:55:14	132.949	72.5678	9.3491	10.1965
2008-08-28 22:03:15	2008-08-28 22:03:15	132.971	72.5894	9.3062	10.4449
2008-08-28 22:11:14	2008-08-28 22:11:14	132.995	72.6109	9.187	10.7627
2008-08-28 22:19:15	2008-08-28 22:19:15	133.018	72.6323	9.0601	11.2077
2008-08-28 22:27:14	2008-08-28 22:27:14	133.041	72.654	8.9661	11.6401
2008-08-28 22:35:15	2008-08-28 22:35:15	133.062	72.6757	8.8471	11.9726
2008-08-28 22:43:14	2008-08-28 22:43:14	133.085	72.6976	8.7106	12.1459
2008-08-28 22:51:15	2008-08-28 22:51:15	133.108	72.7198	8.5417	12.3553
2008-08-28 22:59:14	2008-08-28 22:59:14	133.131	72.7421	8.4973	12.5654
2008-08-28 23:07:14	2008-08-28 23:07:14	133.155	72.7646	8.4127	12.7334
2008-08-28 23:15:15	2008-08-28 23:15:15	133.179	72.7872	8.2472	12.7367
2008-08-28 23:23:14	2008-08-28 23:23:14	133.203	72.8097	7.9114	12.5018
2008-08-28 23:31:15	2008-08-28 23:31:15	133.227	72.8323	7.5906	12.2358
2008-08-28 23:39:14	2008-08-28 23:39:14	133.252	72.8548	7.3177	12.1219
2008-08-28 23:47:15	2008-08-28 23:47:15	133.277	72.8775	7.0564	12.1784
2008-08-28 23:55:14	2008-08-28 23:55:14	133.302	72.9004	6.8782	12.1619
2008-08-29 00:03:15	2008-08-29 00:03:15	133.326	72.9234	6.7869	12.11
2008-08-29 00:11:15	2008-08-29 00:11:15	133.351	72.9465	6.6908	11.8036
2008-08-29 00:19:14	2008-08-29 00:19:14	133.373	72.9699	6.646	11.3421
2008-08-29 00:27:15	2008-08-29 00:27:15	133.395	72.9933	6.6369	10.9094
2008-08-29 00:35:14	2008-08-29 00:35:14	133.342	73.0046	6.6279	10.4764
2008-08-29 00:43:15	2008-08-29 00:43:15	133.255	73.0085	6.6171	10.1869
2008-08-29 00:51:14	2008-08-29 00:51:14	133.173	73.0128	6.6066	9.9796
2008-08-29 00:59:15	2008-08-29 00:59:15	133.101	73.0166	6.6107	9.8392
2008-08-29 01:07:14	2008-08-29 01:07:14	133.033	73.0205	6.6171	9.7332
2008-08-29 01:15:15	2008-08-29 01:15:15	132.996	73.0281	6.5851	9.7105
2008-08-29 01:23:14	2008-08-29 01:23:14	133.003	73.0302	6.558	9.805
2008-08-29 01:31:14	2008-08-29 01:31:14	133.003	73.0286	6.5105	10.2082
2008-08-29 01:39:15	2008-08-29 01:39:15	133.002	73.0269	6.4793	10.8111
2008-08-29 01:47:14	2008-08-29 01:47:14	133.019	73.0254	6.6269	11.2647
2008-08-29 01:55:15	2008-08-29 01:55:15	133.08	73.0258	6.9607	11.8078
2008-08-29 02:03:14	2008-08-29 02:03:14	133.159	73.0271	7.1426	12.2539
2008-08-29 02:11:15	2008-08-29 02:11:15	133.245	73.029	7.0843	12.3796
2008-08-29 02:19:14	2008-08-29 02:19:14	133.331	73.0313	7.1144	12.4309
2008-08-29 02:27:15	2008-08-29 02:27:15	133.416	73.0335	7.2172	12.5621
2008-08-29 02:35:14	2008-08-29 02:35:14	133.5	73.0359	7.1886	12.434
2008-08-29 02:43:14	2008-08-29 02:43:14	133.585	73.0381	7.1941	12.1064
2008-08-29 02:51:15	2008-08-29 02:51:15	133.671	73.0402	7.0951	11.6896
2008-08-29 02:59:14	2008-08-29 02:59:14	133.759	73.0425	6.983	11.3055
2008-08-29 03:07:15	2008-08-29 03:07:15	133.847	73.0444	6.8823	10.9617
2008-08-29 03:15:14	2008-08-29 03:15:14	133.934	73.0462	6.8005	10.6921
2008-08-29 03:23:15	2008-08-29 03:23:15	134.019	73.0474	6.7824	10.5191
2008-08-29 03:31:14	2008-08-29 03:31:14	134.105	73.0482	6.7897	10.3986
2008-08-29 03:39:15	2008-08-29 03:39:15	134.19	73.0489	6.7813	10.317
2008-08-29 03:47:14	2008-08-29 03:47:14	134.276	73.0495	6.7586	10.2506
2008-08-29 03:55:14	2008-08-29 03:55:14	134.363	73.0515	6.7559	10.1995
2008-08-29 04:03:15	2008-08-29 04:03:15	134.45	73.0541	6.777	10.1362
2008-08-29 04:11:14	2008-08-29 04:11:14	134.537	73.0565	6.7857	10.0755
2008-08-29 04:19:15	2008-08-29 04:19:15	134.625	73.0586	6.7802	10.0685
2008-08-29 04:27:14	2008-08-29 04:27:14	134.714	73.0605	6.7395	10.0925
2008-08-29 04:35:15	2008-08-29 04:35:15	134.803	73.0624	6.7417	10.0844
2008-08-29 04:43:14	2008-08-29 04:43:14	134.892	73.0638	6.7616	10.0659
2008-08-29 04:51:15	2008-08-29 04:51:15	134.982	73.0652	6.7599	10.0631
2008-08-29 04:59:14	2008-08-29 04:59:14	135.071	73.0669	6.7604	10.0634
2008-08-29 05:07:14	2008-08-29 05:07:14	135.16	73.0685	6.7739	10.0832
2008-08-29 05:15:15	2008-08-29 05:15:15	135.247	73.0702	6.8053	10.1254
2008-08-29 05:23:14	2008-08-29 05:23:14	135.335	73.0718	6.8429	10.2286
2008-08-29 05:31:15	2008-08-29 05:31:15	135.423	73.0734	6.8602	10.2367
2008-08-29 05:39:14	2008-08-29 05:39:14	135.513	73.0743	6.8614	10.2857
2008-08-29 05:47:15	2008-08-29 05:47:15	135.602	73.076	6.928	10.256
2008-08-29 05:55:14	2008-08-29 05:55:14	135.691	73.0777	6.9358	10.2758
2008-08-29 06:03:15	2008-08-29 06:03:15	135.78	73.0793	6.8207	10.8624
2008-08-29 06:11:15	2008-08-29 06:11:15	135.869	73.0809	6.7161	11.3862
2008-08-29 06:19:14	2008-08-29 06:19:14	135.959	73.0827	6.6856	12.0439
2008-08-29 06:27:15	2008-08-29 06:27:15	136.05	73.0843	6.6612	13.3162
2008-08-29 06:35:14	2008-08-29 06:35:14	136.141	73.086	6.6138	14.4116
2008-08-29 06:43:15	2008-08-29 06:43:15	136.232	73.0878	6.5447	15.1114
2008-08-29 06:51:14	2008-08-29 06:51:14	136.322	73.0896	6.5326	15.4115
2008-08-29 06:59:15	2008-08-29 06:59:15	136.412	73.0911	6.5721	15.5083
2008-08-29 07:07:14	2008-08-29 07:07:14	136.502	73.0932	6.5764	15.5797
2008-08-29 07:15:15	2008-08-29 07:15:15	136.591	73.0953	6.5561	15.7141
2008-08-29 07:23:14	2008-08-29 07:23:14	136.68	73.0969	6.615	15.7179
2008-08-29 07:31:14	2008-08-29 07:31:14	136.771	73.0984	6.6168	15.7734
2008-08-29 07:39:15	2008-08-29 07:39:15	136.863	73.0996	6.6042	15.8447
2008-08-29 07:47:14	2008-08-29 07:47:14	136.954	73.1011	6.5885	15.9147
2008-08-29 07:55:15	2008-08-29 07:55:15	137.047	73.103	6.5985	15.9721
2008-08-29 08:03:14	2008-08-29 08:03:14	137.137	73.105	6.6131	16.0196
2008-08-29 08:11:15	2008-08-29 08:11:15	137.226	73.1067	6.6301	16.0519
2008-08-29 08:19:14	2008-08-29 08:19:14	137.291	73.1081	6.6429	16.0639
2008-08-29 08:27:15	2008-08-29 08:27:15	137.309	73.1101	6.6517	16.0653
2008-08-29 08:35:14	2008-08-29 08:35:14	137.316	73.1102	6.6619	16.0655
2008-08-29 08:43:14	2008-08-29 08:43:14	137.323	73.1104	6.6575	16.0563
2008-08-29 08:51:15	2008-08-29 08:51:15	137.329	73.1106	6.7576	15.9331
2008-08-29 08:59:14	2008-08-29 08:59:14	137.335	73.1108	6.8374	15.7876
2008-08-29 09:07:15	2008-08-29 09:07:15	137.341	73.1109	6.8881	15.6805
2008-08-29 09:15:14	2008-08-29 09:15:14	137.347	73.111	6.8215	15.7437
2008-08-29 09:23:15	2008-08-29 09:23:15	137.353	73.111	6.7391	15.8563
2008-08-29 09:31:14	2008-08-29 09:31:14	137.38	73.1136	6.7439	16.0558
2008-08-29 09:39:15	2008-08-29 09:39:15	137.451	73.1226	6.7725	16.2516
2008-08-29 09:47:14	2008-08-29 09:47:14	137.533	73.1329	6.7894	16.4358
2008-08-29 09:55:14	2008-08-29 09:55:14	137.616	73.1431	6.8289	16.4788
2008-08-29 10:03:15	2008-08-29 10:03:15	137.697	73.1538	6.8835	16.5662
2008-08-29 10:11:14	2008-08-29 10:11:14	137.779	73.1644	6.9021	16.6895
2008-08-29 10:19:15	2008-08-29 10:19:15	137.862	73.174	6.9387	16.6848
2008-08-29 10:27:14	2008-08-29 10:27:14	137.946	73.1831	7.1663	16.451
2008-08-29 10:35:15	2008-08-29 10:35:15	138.028	73.1927	7.374	16.228
2008-08-29 10:43:14	2008-08-29 10:43:14	138.111	73.2021	7.5194	16.0332
2008-08-29 10:51:15	2008-08-29 10:51:15	138.194	73.2116	7.6183	15.9536
2008-08-29 10:59:14	2008-08-29 10:59:14	138.275	73.222	7.7646	15.7638
2008-08-29 11:07:14	2008-08-29 11:07:14	138.357	73.232	7.8442	15.6337
2008-08-29 11:15:15	2008-08-29 11:15:15	138.439	73.2419	7.8097	15.7818
2008-08-29 11:23:14	2008-08-29 11:23:14	138.52	73.2516	7.7925	15.8362
2008-08-29 11:31:15	2008-08-29 11:31:15	138.602	73.2612	7.7459	15.759
2008-08-29 11:39:14	2008-08-29 11:39:14	138.684	73.2706	7.7126	15.7213
2008-08-29 11:47:15	2008-08-29 11:47:15	138.766	73.2805	7.7035	15.7784
2008-08-29 11:55:14	2008-08-29 11:55:14	138.848	73.2905	7.6791	15.7673
2008-08-29 12:03:15	2008-08-29 12:03:15	138.929	73.3005	7.6965	15.5335
2008-08-29 12:11:15	2008-08-29 12:11:15	139.013	73.3083	7.6901	15.3749
2008-08-29 12:19:14	2008-08-29 12:19:14	139.099	73.3148	7.6604	15.0742
2008-08-29 12:27:15	2008-08-29 12:27:15	139.185	73.3214	7.6938	14.5135
2008-08-29 12:35:14	2008-08-29 12:35:14	139.271	73.3276	7.712	14.1563
2008-08-29 12:43:15	2008-08-29 12:43:15	139.357	73.3341	7.7436	13.7642
2008-08-29 12:51:14	2008-08-29 12:51:14	139.441	73.3416	7.7588	13.5164
2008-08-29 12:59:15	2008-08-29 12:59:15	139.526	73.3492	7.7685	13.3343
2008-08-29 13:07:14	2008-08-29 13:07:14	139.603	73.3568	7.7628	13.2432
2008-08-29 13:15:15	2008-08-29 13:15:15	139.652	73.3607	7.7554	13.1949
2008-08-29 13:23:14	2008-08-29 13:23:14	139.677	73.361	7.7434	13.1602
2008-08-29 13:31:14	2008-08-29 13:31:14	139.694	73.3598	7.7293	13.1296
2008-08-29 13:39:15	2008-08-29 13:39:15	139.721	73.3551	7.719	13.0936
2008-08-29 13:47:14	2008-08-29 13:47:14	139.751	73.3482	7.7223	13.1154
2008-08-29 13:55:15	2008-08-29 13:55:15	139.779	73.3398	7.7091	13.2592
2008-08-29 14:03:14	2008-08-29 14:03:14	139.791	73.3283	7.6526	13.3145
2008-08-29 14:11:15	2008-08-29 14:11:15	139.805	73.3163	7.6408	13.1823
2008-08-29 14:19:14	2008-08-29 14:19:14	139.838	73.3087	7.6391	13.0893
2008-08-29 14:27:15	2008-08-29 14:27:15	139.87	73.3029	7.6162	13.0429
2008-08-29 14:35:14	2008-08-29 14:35:14	139.901	73.2971	7.576	13.0355
2008-08-29 14:43:14	2008-08-29 14:43:14	139.933	73.2913	7.5808	12.9971
2008-08-29 14:51:15	2008-08-29 14:51:15	139.966	73.2857	7.5856	12.959
2008-08-29 14:59:14	2008-08-29 14:59:14	139.999	73.28	7.5534	12.9771
2008-08-29 15:07:15	2008-08-29 15:07:15	140.019	73.2754	7.5543	13.1309
2008-08-29 15:15:14	2008-08-29 15:15:14	140.035	73.2729	7.6015	13.2299
2008-08-29 15:23:15	2008-08-29 15:23:15	140.062	73.2748	7.6253	13.3081
2008-08-29 15:31:14	2008-08-29 15:31:14	140.029	73.2822	7.6344	13.3644
2008-08-29 15:39:15	2008-08-29 15:39:15	139.994	73.2891	7.6597	13.4187
2008-08-29 15:47:14	2008-08-29 15:47:14	139.964	73.2969	7.666	13.3884
2008-08-29 15:55:14	2008-08-29 15:55:14	139.92	73.307	7.5996	13.2655
2008-08-29 16:03:15	2008-08-29 16:03:15	139.895	73.3069	7.4553	13.1321
2008-08-29 16:11:14	2008-08-29 16:11:14	139.891	73.3039	7.462	12.9473
2008-08-29 16:19:15	2008-08-29 16:19:15	139.887	73.3024	7.5729	12.7674
2008-08-29 16:27:14	2008-08-29 16:27:14	139.884	73.3005	7.7233	12.6469
2008-08-29 16:35:15	2008-08-29 16:35:15	139.911	73.2881	7.8068	12.5866
2008-08-29 16:43:14	2008-08-29 16:43:14	139.948	73.2722	7.8727	12.5461
2008-08-29 16:51:15	2008-08-29 16:51:15	139.984	73.2563	7.9163	12.5255
2008-08-29 16:59:14	2008-08-29 16:59:14	140.02	73.2397	7.9428	12.5186
2008-08-29 17:07:14	2008-08-29 17:07:14	140.056	73.223	7.9767	12.5058
2008-08-29 17:15:15	2008-08-29 17:15:15	140.087	73.2084	7.9734	12.4824
2008-08-29 17:23:14	2008-08-29 17:23:14	140.116	73.1952	7.9427	12.469
2008-08-29 17:31:15	2008-08-29 17:31:15	140.148	73.1804	7.9123	12.4667
2008-08-29 17:39:14	2008-08-29 17:39:14	140.18	73.1652	7.9032	12.4684
2008-08-29 17:47:15	2008-08-29 17:47:15	140.215	73.1502	7.9405	12.4581
2008-08-29 17:55:14	2008-08-29 17:55:14	140.25	73.135	7.953	12.4608
2008-08-29 18:03:15	2008-08-29 18:03:15	140.285	73.1195	7.9382	12.4735
2008-08-29 18:11:15	2008-08-29 18:11:15	140.315	73.1065	7.9033	12.4952
2008-08-29 18:19:14	2008-08-29 18:19:14	140.33	73.0997	7.8883	12.5257
2008-08-29 18:27:15	2008-08-29 18:27:15	140.35	73.0907	7.8671	12.5599
2008-08-29 18:35:14	2008-08-29 18:35:14	140.349	73.0895	7.8844	12.5655
2008-08-29 18:43:15	2008-08-29 18:43:15	140.346	73.0888	7.9183	12.5525
2008-08-29 18:51:14	2008-08-29 18:51:14	140.343	73.0883	7.9299	12.5511
2008-08-29 18:59:15	2008-08-29 18:59:15	140.343	73.0856	7.9081	12.5941
2008-08-29 19:07:14	2008-08-29 19:07:14	140.365	73.0698	7.8649	12.5831
2008-08-29 19:15:15	2008-08-29 19:15:15	140.39	73.0525	7.7236	12.5822
2008-08-29 19:23:14	2008-08-29 19:23:14	140.414	73.0352	7.5212	12.6556
2008-08-29 19:31:14	2008-08-29 19:31:14	140.438	73.0178	7.1658	13.2519
2008-08-29 19:39:15	2008-08-29 19:39:15	140.461	73.0002	6.8075	13.9438
2008-08-29 19:47:14	2008-08-29 19:47:14	140.484	72.9826	6.4694	14.5533
2008-08-29 19:55:15	2008-08-29 19:55:15	140.507	72.9652	5.9343	15.4209
2008-08-29 20:03:14	2008-08-29 20:03:14	140.529	72.9476	5.4874	16.1788
2008-08-29 20:11:15	2008-08-29 20:11:15	140.557	72.9308	5.2787	16.6547
2008-08-29 20:19:14	2008-08-29 20:19:14	140.585	72.9138	5.0981	17.1064
2008-08-29 20:27:15	2008-08-29 20:27:15	140.608	72.8962	4.9327	17.6251
2008-08-29 20:35:14	2008-08-29 20:35:14	140.627	72.8811	4.7492	18.2188
2008-08-29 20:43:14	2008-08-29 20:43:14	140.629	72.8757	4.6583	18.6176
2008-08-29 20:51:15	2008-08-29 20:51:15	140.624	72.8733	4.5617	18.9365
2008-08-29 20:59:14	2008-08-29 20:59:14	140.618	72.8722	4.4708	19.2243
2008-08-29 21:07:15	2008-08-29 21:07:15	140.618	72.8716	4.3793	19.4332
2008-08-29 21:15:14	2008-08-29 21:15:14	140.618	72.8717	4.2746	19.6018
2008-08-29 21:23:15	2008-08-29 21:23:15	140.618	72.8717	4.3521	19.1351
2008-08-29 21:31:14	2008-08-29 21:31:14	140.618	72.8717	4.4966	18.5032
2008-08-29 21:39:15	2008-08-29 21:39:15	140.618	72.8718	4.6442	18.0556
2008-08-29 21:47:14	2008-08-29 21:47:14	140.618	72.8718	4.7789	17.6827
2008-08-29 21:55:14	2008-08-29 21:55:14	140.618	72.8717	4.8481	17.4391
2008-08-29 22:03:15	2008-08-29 22:03:15	140.618	72.8717	4.9045	17.2941
2008-08-29 22:11:14	2008-08-29 22:11:14	140.621	72.8743	4.8499	17.3117
2008-08-29 22:19:15	2008-08-29 22:19:15	140.606	72.8791	4.8955	17.231
2008-08-29 22:27:14	2008-08-29 22:27:14	140.61	72.8825	5.0321	17.1111
2008-08-29 22:35:15	2008-08-29 22:35:15	140.629	72.8868	5.1537	16.9771
2008-08-29 22:43:14	2008-08-29 22:43:14	140.618	72.8906	5.3566	16.4247
2008-08-29 22:51:15	2008-08-29 22:51:15	140.62	72.8857	5.9264	15.2112
2008-08-29 22:59:14	2008-08-29 22:59:14	140.619	72.8842	6.4515	14.3471
2008-08-29 23:07:14	2008-08-29 23:07:14	140.614	72.8823	6.8344	13.804
2008-08-29 23:15:15	2008-08-29 23:15:15	140.661	72.8912	7.1221	13.3598
2008-08-29 23:23:14	2008-08-29 23:23:14	140.734	72.9023	7.2825	13.0473
2008-08-29 23:31:15	2008-08-29 23:31:15	140.807	72.9131	7.4157	12.7949
2008-08-29 23:39:14	2008-08-29 23:39:14	140.877	72.9242	7.4947	12.6482
2008-08-29 23:47:15	2008-08-29 23:47:15	140.948	72.9353	7.5849	12.5452
2008-08-29 23:55:14	2008-08-29 23:55:14	141.019	72.9466	7.699	12.4928
2008-08-30 00:03:15	2008-08-30 00:03:15	141.093	72.9569	7.7791	12.4618
2008-08-30 00:11:15	2008-08-30 00:11:15	141.176	72.9576	7.7719	12.4323
2008-08-30 00:19:14	2008-08-30 00:19:14	141.261	72.9585	7.6921	12.4448
2008-08-30 00:27:15	2008-08-30 00:27:15	141.347	72.9589	7.5018	12.6634
2008-08-30 00:35:14	2008-08-30 00:35:14	141.434	72.959	7.0689	13.292
2008-08-30 00:43:15	2008-08-30 00:43:15	141.522	72.9595	6.6891	13.6587
2008-08-30 00:51:14	2008-08-30 00:51:14	141.611	72.9604	6.5677	13.7168
2008-08-30 00:59:15	2008-08-30 00:59:15	141.701	72.961	6.784	13.4721
2008-08-30 01:07:14	2008-08-30 01:07:14	141.789	72.9612	7.0394	13.1874
2008-08-30 01:15:15	2008-08-30 01:15:15	141.878	72.9612	7.2535	12.9348
2008-08-30 01:23:14	2008-08-30 01:23:14	141.965	72.9607	7.3848	12.7172
2008-08-30 01:31:14	2008-08-30 01:31:14	142.051	72.9601	7.4815	12.531
2008-08-30 01:39:15	2008-08-30 01:39:15	142.136	72.9599	7.5669	12.3865
2008-08-30 01:47:14	2008-08-30 01:47:14	142.221	72.9593	7.5763	12.2885
2008-08-30 01:55:15	2008-08-30 01:55:15	142.273	72.9399	7.4802	12.2432
2008-08-30 02:03:14	2008-08-30 02:03:14	142.326	72.9204	7.4544	12.2063
2008-08-30 02:11:15	2008-08-30 02:11:15	142.379	72.9005	7.4965	12.174
2008-08-30 02:19:14	2008-08-30 02:19:14	142.431	72.8802	7.556	12.1528
2008-08-30 02:27:15	2008-08-30 02:27:15	142.479	72.8615	7.6079	12.141
2008-08-30 02:35:14	2008-08-30 02:35:14	142.531	72.8443	7.6711	12.1441
2008-08-30 02:43:14	2008-08-30 02:43:14	142.594	72.8307	7.7491	12.1415
2008-08-30 02:51:15	2008-08-30 02:51:15	142.655	72.8158	7.7787	12.1408
2008-08-30 02:59:14	2008-08-30 02:59:14	142.67	72.8034	7.7909	12.1397
2008-08-30 03:07:15	2008-08-30 03:07:15	142.66	72.8056	7.7952	12.1408
2008-08-30 03:15:14	2008-08-30 03:15:14	142.648	72.8015	7.8063	12.1446
2008-08-30 03:23:15	2008-08-30 03:23:15	142.663	72.7878	7.8222	12.1505
2008-08-30 03:31:14	2008-08-30 03:31:14	142.667	72.7893	7.8361	12.1554
2008-08-30 03:39:15	2008-08-30 03:39:15	142.657	72.7895	7.836	12.1608
2008-08-30 03:47:14	2008-08-30 03:47:14	142.656	72.7895	7.8478	12.1658
2008-08-30 03:55:14	2008-08-30 03:55:14	142.657	72.7895	7.8384	12.175
2008-08-30 04:03:15	2008-08-30 04:03:15	142.657	72.7894	7.8423	12.1835
2008-08-30 04:11:14	2008-08-30 04:11:14	142.657	72.7894	7.8273	12.1978
2008-08-30 04:19:15	2008-08-30 04:19:15	142.657	72.7894	7.8274	12.2135
2008-08-30 04:27:14	2008-08-30 04:27:14	142.657	72.7894	7.8251	12.2353
2008-08-30 04:35:15	2008-08-30 04:35:15	142.657	72.7894	7.8349	12.2584
2008-08-30 04:43:14	2008-08-30 04:43:14	142.657	72.7895	7.8434	12.2833
2008-08-30 04:51:15	2008-08-30 04:51:15	142.657	72.7894	7.873	12.3071
2008-08-30 04:59:14	2008-08-30 04:59:14	142.657	72.7894	7.8859	12.3309
2008-08-30 05:07:14	2008-08-30 05:07:14	142.657	72.7894	7.9328	12.3497
2008-08-30 05:15:15	2008-08-30 05:15:15	142.657	72.7894	7.9731	12.3659
2008-08-30 05:23:14	2008-08-30 05:23:14	142.657	72.7894	8.0188	12.388
2008-08-30 05:31:15	2008-08-30 05:31:15	142.657	72.7894	8.0848	12.4153
2008-08-30 05:39:14	2008-08-30 05:39:14	142.657	72.7895	8.1416	12.4367
2008-08-30 05:47:15	2008-08-30 05:47:15	142.657	72.7895	8.2008	12.4499
2008-08-30 05:55:14	2008-08-30 05:55:14	142.656	72.7895	8.2384	12.4548
2008-08-30 06:03:15	2008-08-30 06:03:15	142.656	72.7895	8.2576	12.4567
2008-08-30 06:11:15	2008-08-30 06:11:15	142.656	72.7895	8.2633	12.4534
2008-08-30 06:19:14	2008-08-30 06:19:14	142.656	72.7896	8.2694	12.4465
2008-08-30 06:27:15	2008-08-30 06:27:15	142.657	72.7895	8.2564	12.4385
2008-08-30 06:35:14	2008-08-30 06:35:14	142.657	72.7895	8.2505	12.4296
2008-08-30 06:43:15	2008-08-30 06:43:15	142.657	72.7895	8.2492	12.4206
2008-08-30 06:51:14	2008-08-30 06:51:14	142.657	72.7895	8.2517	12.4115
2008-08-30 06:59:15	2008-08-30 06:59:15	142.657	72.7895	8.2375	12.4029
2008-08-30 07:07:14	2008-08-30 07:07:14	142.656	72.7896	8.2117	12.3922
2008-08-30 07:15:15	2008-08-30 07:15:15	142.657	72.7895	8.1888	12.3808
2008-08-30 07:23:14	2008-08-30 07:23:14	142.656	72.7896	8.1657	12.3677
2008-08-30 07:31:14	2008-08-30 07:31:14	142.656	72.7896	8.1378	12.3547
2008-08-30 07:39:15	2008-08-30 07:39:15	142.656	72.7897	8.1046	12.3391
2008-08-30 07:47:14	2008-08-30 07:47:14	142.656	72.7896	8.0887	12.3255
2008-08-30 07:55:15	2008-08-30 07:55:15	142.657	72.7895	8.0764	12.3098
2008-08-30 08:03:14	2008-08-30 08:03:14	142.657	72.7895	8.0648	12.2947
2008-08-30 08:11:15	2008-08-30 08:11:15	142.656	72.7895	8.0692	12.2817
2008-08-30 08:19:14	2008-08-30 08:19:14	142.656	72.7896	8.0717	12.2697
2008-08-30 08:27:15	2008-08-30 08:27:15	142.656	72.7896	8.0598	12.2586
2008-08-30 08:35:14	2008-08-30 08:35:14	142.656	72.7895	8.0607	12.248
2008-08-30 08:43:14	2008-08-30 08:43:14	142.656	72.7895	8.0578	12.2377
2008-08-30 08:51:15	2008-08-30 08:51:15	142.656	72.7895	8.0441	12.2254
2008-08-30 08:59:14	2008-08-30 08:59:14	142.656	72.7896	8.0235	12.223
2008-08-30 09:07:15	2008-08-30 09:07:15	142.656	72.7896	7.9923	12.2306
2008-08-30 09:15:14	2008-08-30 09:15:14	142.656	72.7896	7.9432	12.2307
2008-08-30 09:23:15	2008-08-30 09:23:15	142.656	72.7896	7.893	12.227
2008-08-30 09:31:14	2008-08-30 09:31:14	142.656	72.7897	7.8556	12.2096
2008-08-30 09:39:15	2008-08-30 09:39:15	142.657	72.7897	7.7314	12.1851
2008-08-30 09:47:14	2008-08-30 09:47:14	142.657	72.792	7.469	12.1938
2008-08-30 09:55:14	2008-08-30 09:55:14	142.653	72.8008	7.4894	12.1806
2008-08-30 10:03:15	2008-08-30 10:03:15	142.658	72.8058	7.5478	12.1413
2008-08-30 10:11:14	2008-08-30 10:11:14	142.656	72.8104	7.5539	12.1182
2008-08-30 10:19:15	2008-08-30 10:19:15	142.654	72.8167	7.5191	12.1101
2008-08-30 10:27:14	2008-08-30 10:27:14	142.656	72.8287	7.5155	12.1072
2008-08-30 10:35:15	2008-08-30 10:35:15	142.658	72.8399	7.507	12.1246
2008-08-30 10:43:14	2008-08-30 10:43:14	142.659	72.8512	7.5225	12.1794
2008-08-30 10:51:15	2008-08-30 10:51:15	142.66	72.8624	7.3493	12.4795
2008-08-30 10:59:14	2008-08-30 10:59:14	142.66	72.8736	7.3265	12.5458
2008-08-30 11:07:14	2008-08-30 11:07:14	142.661	72.885	7.2996	12.5614
2008-08-30 11:15:15	2008-08-30 11:15:15	142.663	72.8966	7.2579	12.5981
2008-08-30 11:23:14	2008-08-30 11:23:14	142.663	72.9082	7.234	12.6219
2008-08-30 11:31:15	2008-08-30 11:31:15	142.663	72.9197	7.2628	12.5738
2008-08-30 11:39:14	2008-08-30 11:39:14	142.662	72.9312	7.3474	12.481
2008-08-30 11:47:15	2008-08-30 11:47:15	142.662	72.9425	7.5046	12.3658
2008-08-30 11:55:14	2008-08-30 11:55:14	142.662	72.9537	7.5465	12.2809
2008-08-30 12:03:15	2008-08-30 12:03:15	142.662	72.965	7.5303	12.2445
2008-08-30 12:11:15	2008-08-30 12:11:15	142.664	72.9763	7.51	12.2313
2008-08-30 12:19:14	2008-08-30 12:19:14	142.665	72.9877	7.4992	12.2253
2008-08-30 12:27:15	2008-08-30 12:27:15	142.665	72.9992	7.4634	12.2389
2008-08-30 12:35:14	2008-08-30 12:35:14	142.664	73.0108	7.433	12.2481
2008-08-30 12:43:15	2008-08-30 12:43:15	142.664	73.022	7.4235	12.2526
2008-08-30 12:51:14	2008-08-30 12:51:14	142.665	73.0316	7.4341	12.2534
2008-08-30 12:59:15	2008-08-30 12:59:15	142.665	73.0388	7.4615	12.252
2008-08-30 13:07:14	2008-08-30 13:07:14	142.665	73.0434	7.4963	12.2499
2008-08-30 13:15:15	2008-08-30 13:15:15	142.666	73.0486	7.5198	12.247
2008-08-30 13:23:14	2008-08-30 13:23:14	142.664	73.0476	7.5387	12.2437
2008-08-30 13:31:14	2008-08-30 13:31:14	142.66	73.047	7.5548	12.2376
2008-08-30 13:39:15	2008-08-30 13:39:15	142.655	73.0465	7.5381	12.2345
2008-08-30 13:47:14	2008-08-30 13:47:14	142.651	73.0461	7.4984	12.2336
2008-08-30 13:55:15	2008-08-30 13:55:15	142.647	73.0456	7.457	12.2376
2008-08-30 14:03:14	2008-08-30 14:03:14	142.641	73.0451	7.4315	12.244
2008-08-30 14:11:15	2008-08-30 14:11:15	142.636	73.0447	7.3334	12.2622
2008-08-30 14:19:14	2008-08-30 14:19:14	142.63	73.0442	7.2143	12.28
2008-08-30 14:27:15	2008-08-30 14:27:15	142.624	73.0436	7.1244	12.2901
2008-08-30 14:35:14	2008-08-30 14:35:14	142.624	73.0408	7.0405	12.2861
2008-08-30 14:43:14	2008-08-30 14:43:14	142.654	73.0406	7.0201	12.2738
2008-08-30 14:51:15	2008-08-30 14:51:15	142.664	73.0447	7.0521	12.2642
2008-08-30 14:59:14	2008-08-30 14:59:14	142.666	73.0536	7.1335	12.2556
2008-08-30 15:07:15	2008-08-30 15:07:15	142.667	73.0647	7.1503	12.2622
2008-08-30 15:15:14	2008-08-30 15:15:14	142.668	73.0759	7.1376	12.2752
2008-08-30 15:23:15	2008-08-30 15:23:15	142.668	73.0869	7.1073	12.2784
2008-08-30 15:31:14	2008-08-30 15:31:14	142.667	73.0978	7.1098	12.2746
2008-08-30 15:39:15	2008-08-30 15:39:15	142.666	73.1087	7.1433	12.2635
2008-08-30 15:47:14	2008-08-30 15:47:14	142.666	73.1199	7.1751	12.2518
2008-08-30 15:55:14	2008-08-30 15:55:14	142.666	73.1309	7.21	12.2405
2008-08-30 16:03:15	2008-08-30 16:03:15	142.666	73.1372	7.2345	12.2297
2008-08-30 16:11:14	2008-08-30 16:11:14	142.666	73.1421	7.2789	12.2229
2008-08-30 16:19:15	2008-08-30 16:19:15	142.669	73.1438	7.314	12.2172
2008-08-30 16:27:14	2008-08-30 16:27:14	142.67	73.1441	7.3202	12.2133
2008-08-30 16:35:15	2008-08-30 16:35:15	142.67	73.1439	7.3938	12.2158
2008-08-30 16:43:14	2008-08-30 16:43:14	142.671	73.1434	7.4839	12.2576
2008-08-30 16:51:15	2008-08-30 16:51:15	142.671	73.143	7.4994	12.2897
2008-08-30 16:59:14	2008-08-30 16:59:14	142.671	73.1425	7.3362	12.3214
2008-08-30 17:07:14	2008-08-30 17:07:14	142.686	73.1411	7.1956	12.4589
2008-08-30 17:15:15	2008-08-30 17:15:15	142.747	73.1366	6.8513	12.6475
2008-08-30 17:23:14	2008-08-30 17:23:14	142.819	73.1316	6.4862	12.7928
2008-08-30 17:31:15	2008-08-30 17:31:15	142.899	73.1261	6.2172	12.9285
2008-08-30 17:39:14	2008-08-30 17:39:14	142.984	73.1208	6.3096	13.0206
2008-08-30 17:47:15	2008-08-30 17:47:15	143.069	73.1157	6.4933	13.1266
2008-08-30 17:55:14	2008-08-30 17:55:14	143.154	73.1106	6.805	13.2441
2008-08-30 18:03:15	2008-08-30 18:03:15	143.24	73.1052	7.0282	13.4028
2008-08-30 18:11:15	2008-08-30 18:11:15	143.325	73.0999	7.2822	13.589
2008-08-30 18:19:14	2008-08-30 18:19:14	143.41	73.0945	7.4797	13.7506
2008-08-30 18:27:15	2008-08-30 18:27:15	143.496	73.0891	7.6268	13.9273
2008-08-30 18:35:14	2008-08-30 18:35:14	143.582	73.0838	7.7482	13.9044
2008-08-30 18:43:15	2008-08-30 18:43:15	143.668	73.0783	7.8481	13.8883
2008-08-30 18:51:14	2008-08-30 18:51:14	143.754	73.0728	7.9715	13.8671
2008-08-30 18:59:15	2008-08-30 18:59:15	143.84	73.0673	8.0553	13.8976
2008-08-30 19:07:14	2008-08-30 19:07:14	143.925	73.0617	8.0484	13.9419
2008-08-30 19:15:15	2008-08-30 19:15:15	144.01	73.0561	8.084	14.0296
2008-08-30 19:23:14	2008-08-30 19:23:14	144.095	73.0505	8.0959	14.1335
2008-08-30 19:31:14	2008-08-30 19:31:14	144.181	73.045	8.086	14.3998
2008-08-30 19:39:15	2008-08-30 19:39:15	144.266	73.0393	8.0498	14.6988
2008-08-30 19:47:14	2008-08-30 19:47:14	144.352	73.035	8.0169	14.9266
2008-08-30 19:55:15	2008-08-30 19:55:15	144.44	73.0342	7.9683	15.2696
2008-08-30 20:03:14	2008-08-30 20:03:14	144.528	73.0341	7.9398	15.6656
2008-08-30 20:11:15	2008-08-30 20:11:15	144.616	73.0341	7.9341	15.9265
2008-08-30 20:19:14	2008-08-30 20:19:14	144.703	73.0345	7.9082	16.1191
2008-08-30 20:27:15	2008-08-30 20:27:15	144.788	73.0346	7.8606	16.3277
2008-08-30 20:35:14	2008-08-30 20:35:14	144.873	73.0345	7.8496	16.3796
2008-08-30 20:43:14	2008-08-30 20:43:14	144.958	73.0343	7.8271	16.5103
2008-08-30 20:51:15	2008-08-30 20:51:15	145.044	73.0341	7.7857	16.7177
2008-08-30 20:59:14	2008-08-30 20:59:14	145.13	73.0341	7.6992	16.9485
2008-08-30 21:07:15	2008-08-30 21:07:15	145.218	73.0344	7.6592	17.0783
2008-08-30 21:15:14	2008-08-30 21:15:14	145.306	73.0348	7.5758	17.2503
2008-08-30 21:23:15	2008-08-30 21:23:15	145.394	73.0351	7.4402	17.5433
2008-08-30 21:31:14	2008-08-30 21:31:14	145.482	73.0352	7.2113	18.1924
2008-08-30 21:39:15	2008-08-30 21:39:15	145.569	73.035	6.988	18.8174
2008-08-30 21:47:14	2008-08-30 21:47:14	145.657	73.0347	6.8465	19.1918
2008-08-30 21:55:14	2008-08-30 21:55:14	145.745	73.0342	6.6445	19.5918
2008-08-30 22:03:15	2008-08-30 22:03:15	145.833	73.0335	6.5008	19.8574
2008-08-30 22:11:14	2008-08-30 22:11:14	145.92	73.033	6.3892	20.0564
2008-08-30 22:19:15	2008-08-30 22:19:15	146.007	73.0332	6.3293	20.2111
2008-08-30 22:27:14	2008-08-30 22:27:14	146.096	73.0331	6.2948	20.2976
2008-08-30 22:35:15	2008-08-30 22:35:15	146.184	73.0328	6.2741	20.2115
2008-08-30 22:43:14	2008-08-30 22:43:14	146.271	73.0322	6.4251	19.6917
2008-08-30 22:51:15	2008-08-30 22:51:15	146.359	73.0326	6.5965	19.2561
2008-08-30 22:59:14	2008-08-30 22:59:14	146.447	73.0327	6.7548	18.9547
2008-08-30 23:07:14	2008-08-30 23:07:14	146.535	73.0327	6.9428	18.7195
2008-08-30 23:15:15	2008-08-30 23:15:15	146.622	73.0328	7.0673	18.5578
2008-08-30 23:23:14	2008-08-30 23:23:14	146.71	73.033	7.1354	18.5022
2008-08-30 23:31:15	2008-08-30 23:31:15	146.797	73.0335	7.0452	18.6397
2008-08-30 23:39:14	2008-08-30 23:39:14	146.884	73.0339	6.84	18.9171
2008-08-30 23:47:15	2008-08-30 23:47:15	146.971	73.0334	6.5638	19.2677
2008-08-30 23:55:14	2008-08-30 23:55:14	147.058	73.0325	6.5278	19.3468
2008-08-31 00:03:15	2008-08-31 00:03:15	147.144	73.0321	6.5247	19.3977
2008-08-31 00:11:15	2008-08-31 00:11:15	147.229	73.0315	6.4739	19.5123
2008-08-31 00:19:14	2008-08-31 00:19:14	147.314	73.0313	6.3817	19.6861
2008-08-31 00:27:15	2008-08-31 00:27:15	147.398	73.0317	6.1256	19.9362
2008-08-31 00:35:14	2008-08-31 00:35:14	147.483	73.0322	5.8111	20.2608
2008-08-31 00:43:15	2008-08-31 00:43:15	147.568	73.0324	5.7647	20.0861
2008-08-31 00:51:14	2008-08-31 00:51:14	147.653	73.0322	5.8303	19.7681
2008-08-31 00:59:15	2008-08-31 00:59:15	147.74	73.0322	5.9618	19.417
2008-08-31 01:07:14	2008-08-31 01:07:14	147.827	73.0327	6.1819	19.1077
2008-08-31 01:15:15	2008-08-31 01:15:15	147.914	73.033	6.6255	18.8652
2008-08-31 01:23:14	2008-08-31 01:23:14	147.986	73.0193	6.9178	18.2675
2008-08-31 01:31:14	2008-08-31 01:31:14	148.057	73.0048	7.0775	17.363
2008-08-31 01:39:15	2008-08-31 01:39:15	148.128	72.9905	7.1336	16.6593
2008-08-31 01:47:14	2008-08-31 01:47:14	148.199	72.976	7.1489	16.2057
2008-08-31 01:55:15	2008-08-31 01:55:15	148.268	72.9611	7.0306	16.2859
2008-08-31 02:03:14	2008-08-31 02:03:14	148.336	72.9461	6.9551	16.4651
2008-08-31 02:11:15	2008-08-31 02:11:15	148.402	72.9309	6.9213	16.7276
2008-08-31 02:19:14	2008-08-31 02:19:14	148.468	72.9162	6.9947	17.1889
2008-08-31 02:27:15	2008-08-31 02:27:15	148.537	72.9018	7.1684	17.4155
2008-08-31 02:35:14	2008-08-31 02:35:14	148.608	72.8877	7.2549	16.8691
2008-08-31 02:43:14	2008-08-31 02:43:14	148.679	72.8735	7.4055	16.418
2008-08-31 02:51:15	2008-08-31 02:51:15	148.75	72.8592	7.5664	16.277
2008-08-31 02:59:14	2008-08-31 02:59:14	148.821	72.8448	7.7447	16.3362
2008-08-31 03:07:15	2008-08-31 03:07:15	148.89	72.8303	7.953	16.7161
2008-08-31 03:15:14	2008-08-31 03:15:14	148.958	72.8153	8.0971	17.0944
2008-08-31 03:23:15	2008-08-31 03:23:15	149.032	72.7993	8.2207	17.4145
2008-08-31 03:31:14	2008-08-31 03:31:14	149.101	72.785	8.3381	17.5386
2008-08-31 03:39:15	2008-08-31 03:39:15	149.17	72.7705	8.4102	17.5794
2008-08-31 03:47:14	2008-08-31 03:47:14	149.239	72.7561	8.4447	17.6899
2008-08-31 03:55:14	2008-08-31 03:55:14	149.306	72.7416	8.4576	17.7536
2008-08-31 04:03:15	2008-08-31 04:03:15	149.374	72.7272	8.4479	17.8215
2008-08-31 04:11:14	2008-08-31 04:11:14	149.443	72.7126	8.4421	17.5726
2008-08-31 04:19:15	2008-08-31 04:19:15	149.51	72.698	8.4161	17.3469
2008-08-31 04:27:14	2008-08-31 04:27:14	149.577	72.6834	8.4259	17.1399
2008-08-31 04:35:15	2008-08-31 04:35:15	149.645	72.6691	8.4219	17.149
2008-08-31 04:43:14	2008-08-31 04:43:14	149.712	72.6549	8.4404	17.327
2008-08-31 04:51:15	2008-08-31 04:51:15	149.78	72.6403	8.4535	17.5029
2008-08-31 04:59:14	2008-08-31 04:59:14	149.848	72.6255	8.5037	17.6851
2008-08-31 05:07:14	2008-08-31 05:07:14	149.916	72.6109	8.5181	17.7024
2008-08-31 05:15:15	2008-08-31 05:15:15	149.985	72.5961	8.5121	17.7561
2008-08-31 05:23:14	2008-08-31 05:23:14	150.056	72.5811	8.4735	17.7113
2008-08-31 05:31:15	2008-08-31 05:31:15	150.125	72.5662	8.4829	17.8595
2008-08-31 05:39:14	2008-08-31 05:39:14	150.194	72.5515	8.3008	18.2769
2008-08-31 05:47:15	2008-08-31 05:47:15	150.263	72.5367	8.1165	18.6105
2008-08-31 05:55:14	2008-08-31 05:55:14	150.332	72.5218	7.9718	18.8557
2008-08-31 06:03:15	2008-08-31 06:03:15	150.401	72.5069	7.9002	18.9651
2008-08-31 06:11:15	2008-08-31 06:11:15	150.47	72.4921	7.9048	19.0285
2008-08-31 06:19:14	2008-08-31 06:19:14	150.537	72.4776	7.9636	19.0777
2008-08-31 06:27:15	2008-08-31 06:27:15	150.59	72.4662	8.0677	19.1094
2008-08-31 06:35:14	2008-08-31 06:35:14	150.602	72.4616	8.1788	19.128
2008-08-31 06:43:15	2008-08-31 06:43:15	150.598	72.4601	8.2979	19.1435
2008-08-31 06:51:14	2008-08-31 06:51:14	150.593	72.4597	8.3909	19.1473
2008-08-31 06:59:15	2008-08-31 06:59:15	150.589	72.4594	8.482	19.1598
2008-08-31 07:07:14	2008-08-31 07:07:14	150.586	72.4593	8.5701	19.1645
2008-08-31 07:15:15	2008-08-31 07:15:15	150.586	72.4592	8.624	19.1695
2008-08-31 07:23:14	2008-08-31 07:23:14	150.586	72.4591	8.669	19.1729
2008-08-31 07:31:14	2008-08-31 07:31:14	150.587	72.459	8.7179	19.1805
2008-08-31 07:39:15	2008-08-31 07:39:15	150.587	72.459	8.7457	19.1854
2008-08-31 07:47:14	2008-08-31 07:47:14	150.587	72.459	8.7694	19.1895
2008-08-31 07:55:15	2008-08-31 07:55:15	150.587	72.459	8.7568	19.1912
2008-08-31 08:03:14	2008-08-31 08:03:14	150.587	72.459	8.7141	19.1961
2008-08-31 08:11:15	2008-08-31 08:11:15	150.587	72.459	8.6066	19.1998
2008-08-31 08:19:14	2008-08-31 08:19:14	150.587	72.459	8.4616	19.2031
2008-08-31 08:27:15	2008-08-31 08:27:15	150.587	72.459	8.3232	19.2056
2008-08-31 08:35:14	2008-08-31 08:35:14	150.587	72.459	8.2003	19.2092
2008-08-31 08:43:14	2008-08-31 08:43:14	150.587	72.4589	8.094	19.2119
2008-08-31 08:51:15	2008-08-31 08:51:15	150.587	72.4587	8.0071	19.211
2008-08-31 08:59:14	2008-08-31 08:59:14	150.587	72.4586	7.9407	19.2153
2008-08-31 09:07:15	2008-08-31 09:07:15	150.586	72.4587	7.8942	19.2158
2008-08-31 09:15:14	2008-08-31 09:15:14	150.586	72.4586	7.8563	19.2176
2008-08-31 09:23:15	2008-08-31 09:23:15	150.586	72.4587	7.8278	19.2174
2008-08-31 09:31:14	2008-08-31 09:31:14	150.586	72.4587	7.8217	19.2176
2008-08-31 09:39:15	2008-08-31 09:39:15	150.586	72.4587	7.796	19.2155
2008-08-31 09:47:14	2008-08-31 09:47:14	150.586	72.4587	7.7454	19.2069
2008-08-31 09:55:14	2008-08-31 09:55:14	150.586	72.4586	7.6657	19.1926
2008-08-31 10:03:15	2008-08-31 10:03:15	150.587	72.4587	7.6243	19.1792
2008-08-31 10:11:14	2008-08-31 10:11:14	150.586	72.4587	7.5747	19.1653
2008-08-31 10:19:15	2008-08-31 10:19:15	150.586	72.4588	7.5443	19.1569
2008-08-31 10:27:14	2008-08-31 10:27:14	150.586	72.4588	7.518	19.1471
2008-08-31 10:35:15	2008-08-31 10:35:15	150.585	72.4588	7.501	19.1411
2008-08-31 10:43:14	2008-08-31 10:43:14	150.585	72.4588	7.4913	19.137
2008-08-31 10:51:15	2008-08-31 10:51:15	150.585	72.4588	7.4822	19.1346
2008-08-31 10:59:14	2008-08-31 10:59:14	150.585	72.4588	7.4779	19.1328
2008-08-31 11:07:14	2008-08-31 11:07:14	150.585	72.4588	7.4738	19.1332
2008-08-31 11:15:15	2008-08-31 11:15:15	150.585	72.4588	7.4678	19.1339
2008-08-31 11:23:14	2008-08-31 11:23:14	150.585	72.4588	7.4596	19.1358
2008-08-31 11:31:15	2008-08-31 11:31:15	150.585	72.4588	7.4459	19.1379
2008-08-31 11:39:14	2008-08-31 11:39:14	150.585	72.4589	7.4315	19.1406
2008-08-31 11:47:15	2008-08-31 11:47:15	150.585	72.4589	7.4257	19.1432
2008-08-31 11:55:14	2008-08-31 11:55:14	150.585	72.459	7.4169	19.1451
2008-08-31 12:03:15	2008-08-31 12:03:15	150.585	72.4588	7.3642	19.1268
2008-08-31 12:11:15	2008-08-31 12:11:15	150.585	72.4589	7.3241	19.0969
2008-08-31 12:19:14	2008-08-31 12:19:14	150.585	72.4589	7.2912	19.0604
2008-08-31 12:27:15	2008-08-31 12:27:15	150.585	72.4589	7.2709	19.0228
2008-08-31 12:35:14	2008-08-31 12:35:14	150.585	72.4589	7.2687	18.9953
2008-08-31 12:43:15	2008-08-31 12:43:15	150.585	72.4589	7.2748	18.97
2008-08-31 12:51:14	2008-08-31 12:51:14	150.585	72.4589	7.2693	18.9496
2008-08-31 12:59:15	2008-08-31 12:59:15	150.585	72.4588	7.2458	18.9253
2008-08-31 13:07:14	2008-08-31 13:07:14	150.585	72.4589	7.2116	18.8806
2008-08-31 13:15:15	2008-08-31 13:15:15	150.585	72.459	7.1794	18.8259
2008-08-31 13:23:14	2008-08-31 13:23:14	150.585	72.4589	7.2069	18.7965
2008-08-31 13:31:14	2008-08-31 13:31:14	150.585	72.459	7.2594	18.7823
2008-08-31 13:39:15	2008-08-31 13:39:15	150.588	72.4594	7.2084	18.6307
2008-08-31 13:47:14	2008-08-31 13:47:14	150.597	72.4605	7.1382	18.3937
2008-08-31 13:55:15	2008-08-31 13:55:15	150.602	72.4608	7.074	18.1443
2008-08-31 14:03:14	2008-08-31 14:03:14	150.617	72.4617	7.0273	17.9424
2008-08-31 14:11:15	2008-08-31 14:11:15	150.687	72.466	6.9964	17.7818
2008-08-31 14:19:14	2008-08-31 14:19:14	150.751	72.47	6.9825	17.6824
2008-08-31 14:27:15	2008-08-31 14:27:15	150.815	72.4739	6.9852	17.5997
2008-08-31 14:35:14	2008-08-31 14:35:14	150.879	72.4775	6.9926	17.5633
2008-08-31 14:43:14	2008-08-31 14:43:14	150.942	72.481	6.9991	17.5586
2008-08-31 14:51:15	2008-08-31 14:51:15	151.001	72.4842	6.9903	17.5807
2008-08-31 14:59:14	2008-08-31 14:59:14	151.058	72.4875	6.9691	17.6205
2008-08-31 15:07:15	2008-08-31 15:07:15	151.115	72.4909	6.9132	17.6057
2008-08-31 15:15:14	2008-08-31 15:15:14	151.174	72.4946	6.8703	17.491
2008-08-31 15:23:15	2008-08-31 15:23:15	151.232	72.4984	6.8581	17.3364
2008-08-31 15:31:14	2008-08-31 15:31:14	151.29	72.5019	6.8671	17.1611
2008-08-31 15:39:15	2008-08-31 15:39:15	151.348	72.5055	6.8815	16.9212
2008-08-31 15:47:14	2008-08-31 15:47:14	151.407	72.5091	6.8884	16.7032
2008-08-31 15:55:14	2008-08-31 15:55:14	151.466	72.5127	6.8826	16.5195
2008-08-31 16:03:15	2008-08-31 16:03:15	151.523	72.5162	6.8627	16.3498
2008-08-31 16:11:14	2008-08-31 16:11:14	151.579	72.5195	6.8388	16.2281
2008-08-31 16:19:15	2008-08-31 16:19:15	151.635	72.5227	6.8187	16.136
2008-08-31 16:27:14	2008-08-31 16:27:14	151.691	72.5259	6.8025	16.0741
2008-08-31 16:35:15	2008-08-31 16:35:15	151.746	72.5289	6.7824	16.0183
2008-08-31 16:43:14	2008-08-31 16:43:14	151.802	72.5322	6.761	15.9831
2008-08-31 16:51:15	2008-08-31 16:51:15	151.857	72.5355	6.7549	15.9641
2008-08-31 16:59:14	2008-08-31 16:59:14	151.913	72.5389	6.7483	15.9659
2008-08-31 17:07:14	2008-08-31 17:07:14	151.969	72.5425	6.7284	15.9964
2008-08-31 17:15:15	2008-08-31 17:15:15	152.025	72.5458	6.6648	16.0525
2008-08-31 17:23:14	2008-08-31 17:23:14	152.082	72.5494	6.6287	16.0988
2008-08-31 17:31:15	2008-08-31 17:31:15	152.139	72.5532	6.6216	16.1337
2008-08-31 17:39:14	2008-08-31 17:39:14	152.196	72.557	6.6313	16.1565
2008-08-31 17:47:15	2008-08-31 17:47:15	152.254	72.5607	6.6376	16.1722
2008-08-31 17:55:14	2008-08-31 17:55:14	152.311	72.564	6.6555	16.1822
2008-08-31 18:03:15	2008-08-31 18:03:15	152.354	72.5663	6.6555	16.1906
2008-08-31 18:11:15	2008-08-31 18:11:15	152.373	72.5671	6.6632	16.1956
2008-08-31 18:19:14	2008-08-31 18:19:14	152.378	72.5671	6.6712	16.2004
2008-08-31 18:27:15	2008-08-31 18:27:15	152.38	72.5671	6.6835	16.204
2008-08-31 18:35:14	2008-08-31 18:35:14	152.381	72.5672	6.6883	16.207
2008-08-31 18:43:15	2008-08-31 18:43:15	152.382	72.5674	6.6931	16.2108
2008-08-31 18:51:14	2008-08-31 18:51:14	152.384	72.5676	6.6895	16.2146
2008-08-31 18:59:15	2008-08-31 18:59:15	152.385	72.5678	6.6811	16.2178
2008-08-31 19:07:14	2008-08-31 19:07:14	152.386	72.5678	6.6509	16.2187
2008-08-31 19:15:15	2008-08-31 19:15:15	152.386	72.5678	6.6299	16.223
2008-08-31 19:23:14	2008-08-31 19:23:14	152.387	72.5675	6.5979	16.2316
2008-08-31 19:31:14	2008-08-31 19:31:14	152.387	72.5673	6.5691	16.2495
2008-08-31 19:39:15	2008-08-31 19:39:15	152.388	72.5671	6.5158	16.2735
2008-08-31 19:47:14	2008-08-31 19:47:14	152.4	72.5675	6.4611	16.2955
2008-08-31 19:55:15	2008-08-31 19:55:15	152.444	72.5694	6.4345	16.3084
2008-08-31 20:03:14	2008-08-31 20:03:14	152.502	72.5723	6.4202	16.3265
2008-08-31 20:11:15	2008-08-31 20:11:15	152.561	72.5751	6.4192	16.347
2008-08-31 20:19:14	2008-08-31 20:19:14	152.619	72.578	6.4125	16.3917
2008-08-31 20:27:15	2008-08-31 20:27:15	152.677	72.5809	6.3383	16.5611
2008-08-31 20:35:14	2008-08-31 20:35:14	152.735	72.5838	6.2501	16.7722
2008-08-31 20:43:14	2008-08-31 20:43:14	152.793	72.5867	6.1552	16.9718
2008-08-31 20:51:15	2008-08-31 20:51:15	152.851	72.5895	5.9901	17.2329
2008-08-31 20:59:14	2008-08-31 20:59:14	152.907	72.5923	5.6472	17.6685
2008-08-31 21:07:15	2008-08-31 21:07:15	152.963	72.5949	5.335	18.0044
2008-08-31 21:15:14	2008-08-31 21:15:14	153.02	72.5975	5.2311	18.1352
2008-08-31 21:23:15	2008-08-31 21:23:15	153.078	72.6	5.206	18.1727
2008-08-31 21:31:14	2008-08-31 21:31:14	153.136	72.6022	5.2049	18.1689
2008-08-31 21:39:15	2008-08-31 21:39:15	153.194	72.6044	5.2323	18.1649
2008-08-31 21:47:14	2008-08-31 21:47:14	153.252	72.6073	5.2523	18.1745
2008-08-31 21:55:14	2008-08-31 21:55:14	153.31	72.6105	5.2627	18.1916
2008-08-31 22:03:15	2008-08-31 22:03:15	153.368	72.6136	5.2491	18.2086
2008-08-31 22:11:14	2008-08-31 22:11:14	153.425	72.6164	5.2348	18.2273
2008-08-31 22:19:15	2008-08-31 22:19:15	153.481	72.6189	5.2455	18.2357
2008-08-31 22:27:14	2008-08-31 22:27:14	153.538	72.6213	5.2492	18.2125
2008-08-31 22:35:15	2008-08-31 22:35:15	153.596	72.6237	5.2635	18.1875
2008-08-31 22:43:14	2008-08-31 22:43:14	153.654	72.6261	5.2795	18.1843
2008-08-31 22:51:15	2008-08-31 22:51:15	153.712	72.6285	5.2941	18.1913
2008-08-31 22:59:14	2008-08-31 22:59:14	153.768	72.6316	5.294	18.205
2008-08-31 23:07:14	2008-08-31 23:07:14	153.826	72.6345	5.2557	18.246
2008-08-31 23:15:15	2008-08-31 23:15:15	153.883	72.6376	5.1567	18.3392
2008-08-31 23:23:14	2008-08-31 23:23:14	153.941	72.6399	4.9768	18.5598
2008-08-31 23:31:15	2008-08-31 23:31:15	153.999	72.6424	4.7427	18.8754
2008-08-31 23:39:14	2008-08-31 23:39:14	154.056	72.6448	4.5114	19.1703
2008-08-31 23:47:15	2008-08-31 23:47:15	154.112	72.6475	4.324	19.3772
2008-08-31 23:55:14	2008-08-31 23:55:14	154.16	72.6498	4.1856	19.4994
2008-09-01 00:03:15	2008-09-01 00:03:15	154.186	72.651	4.0754	19.5708
2008-09-01 00:11:15	2008-09-01 00:11:15	154.187	72.6503	3.9984	19.6006
2008-09-01 00:19:14	2008-09-01 00:19:14	154.188	72.6495	3.9741	19.6087
2008-09-01 00:27:15	2008-09-01 00:27:15	154.189	72.6486	3.9599	19.605
2008-09-01 00:35:14	2008-09-01 00:35:14	154.189	72.6478	3.9714	19.5942
2008-09-01 00:43:15	2008-09-01 00:43:15	154.189	72.6469	3.9892	19.5816
2008-09-01 00:51:14	2008-09-01 00:51:14	154.19	72.646	4.015	19.5651
2008-09-01 00:59:15	2008-09-01 00:59:15	154.19	72.6451	4.0898	19.5366
2008-09-01 01:07:14	2008-09-01 01:07:14	154.19	72.6442	4.1587	19.4561
2008-09-01 01:15:15	2008-09-01 01:15:15	154.19	72.6433	4.2902	19.281
2008-09-01 01:23:14	2008-09-01 01:23:14	154.189	72.6423	4.5171	19.0358
2008-09-01 01:31:14	2008-09-01 01:31:14	154.189	72.6415	4.7501	18.7942
2008-09-01 01:39:15	2008-09-01 01:39:15	154.188	72.6406	4.9217	18.6281
2008-09-01 01:47:14	2008-09-01 01:47:14	154.187	72.6397	5.0726	18.482
2008-09-01 01:55:15	2008-09-01 01:55:15	154.173	72.6311	5.1793	18.3853
2008-09-01 02:03:14	2008-09-01 02:03:14	154.13	72.614	5.2507	18.3058
2008-09-01 02:11:15	2008-09-01 02:11:15	154.081	72.5937	5.3179	18.2495
2008-09-01 02:19:14	2008-09-01 02:19:14	154.031	72.5719	5.3743	18.1776
2008-09-01 02:27:15	2008-09-01 02:27:15	153.979	72.5505	5.4318	18.0915
2008-09-01 02:35:14	2008-09-01 02:35:14	153.927	72.5292	5.5334	17.9502
2008-09-01 02:43:14	2008-09-01 02:43:14	153.876	72.5079	5.6185	17.8191
2008-09-01 02:51:15	2008-09-01 02:51:15	153.824	72.4868	5.7603	17.6084
2008-09-01 02:59:14	2008-09-01 02:59:14	153.773	72.4662	5.9292	17.3589
2008-09-01 03:07:15	2008-09-01 03:07:15	153.722	72.4454	6.0246	17.2326
2008-09-01 03:15:14	2008-09-01 03:15:14	153.673	72.4246	6.1031	17.1697
2008-09-01 03:23:15	2008-09-01 03:23:15	153.625	72.4032	6.0924	17.2029
2008-09-01 03:31:14	2008-09-01 03:31:14	153.575	72.3824	6.109	17.2549
2008-09-01 03:39:15	2008-09-01 03:39:15	153.529	72.3614	6.1539	17.3356
2008-09-01 03:47:14	2008-09-01 03:47:14	153.479	72.3408	6.2263	17.4536
2008-09-01 03:55:14	2008-09-01 03:55:14	153.43	72.3202	6.3036	17.5515
2008-09-01 04:03:15	2008-09-01 04:03:15	153.383	72.2994	6.3787	17.6121
2008-09-01 04:11:14	2008-09-01 04:11:14	153.337	72.2785	6.4365	17.6523
2008-09-01 04:19:15	2008-09-01 04:19:15	153.29	72.2578	6.4382	17.6813
2008-09-01 04:27:14	2008-09-01 04:27:14	153.245	72.2362	6.4602	17.7388
2008-09-01 04:35:15	2008-09-01 04:35:15	153.205	72.2147	6.4879	17.8125
2008-09-01 04:43:14	2008-09-01 04:43:14	153.173	72.2003	6.4932	17.8651
2008-09-01 04:51:15	2008-09-01 04:51:15	153.165	72.2	6.4339	17.8908
2008-09-01 04:59:14	2008-09-01 04:59:14	153.161	72.2001	6.3556	17.8867
2008-09-01 05:07:14	2008-09-01 05:07:14	153.158	72.2001	6.3217	17.8763
2008-09-01 05:15:15	2008-09-01 05:15:15	153.156	72.2	6.3213	17.8552
2008-09-01 05:23:14	2008-09-01 05:23:14	153.154	72.1996	6.3164	17.8158
2008-09-01 05:31:15	2008-09-01 05:31:15	153.15	72.199	6.3211	17.8016
2008-09-01 05:39:14	2008-09-01 05:39:14	153.148	72.1985	6.3188	17.8022
2008-09-01 05:47:15	2008-09-01 05:47:15	153.146	72.1979	6.2983	17.7535
2008-09-01 05:55:14	2008-09-01 05:55:14	153.145	72.197	6.2571	17.6607
2008-09-01 06:03:15	2008-09-01 06:03:15	153.142	72.1962	6.2277	17.581
2008-09-01 06:11:15	2008-09-01 06:11:15	153.131	72.1917	6.2187	17.4951
2008-09-01 06:19:14	2008-09-01 06:19:14	153.087	72.1738	6.2271	17.4421
2008-09-01 06:27:15	2008-09-01 06:27:15	153.035	72.1525	6.2523	17.4153
2008-09-01 06:35:14	2008-09-01 06:35:14	152.982	72.1307	6.2688	17.4413
2008-09-01 06:43:15	2008-09-01 06:43:15	152.927	72.1092	6.2786	17.6783
2008-09-01 06:51:14	2008-09-01 06:51:14	152.872	72.088	6.2583	18.1846
2008-09-01 06:59:15	2008-09-01 06:59:15	152.816	72.0672	6.2962	18.2562
2008-09-01 07:07:14	2008-09-01 07:07:14	152.761	72.0473	6.3521	18.2242
2008-09-01 07:15:15	2008-09-01 07:15:15	152.706	72.0267	6.4019	18.1975
2008-09-01 07:23:14	2008-09-01 07:23:14	152.653	72.0059	6.4461	18.1857
2008-09-01 07:31:14	2008-09-01 07:31:14	152.601	71.9849	6.5091	18.2054
2008-09-01 07:39:15	2008-09-01 07:39:15	152.551	71.9638	6.5692	18.3302
2008-09-01 07:47:14	2008-09-01 07:47:14	152.502	71.9423	6.609	18.6883
2008-09-01 07:55:15	2008-09-01 07:55:15	152.45	71.9211	6.668	19.0287
2008-09-01 08:03:14	2008-09-01 08:03:14	152.395	71.9004	6.7001	19.2275
2008-09-01 08:11:15	2008-09-01 08:11:15	152.339	71.8801	6.7167	19.3688
2008-09-01 08:19:14	2008-09-01 08:19:14	152.283	71.8603	6.7233	19.4762
2008-09-01 08:27:15	2008-09-01 08:27:15	152.234	71.842	6.739	19.5935
2008-09-01 08:35:14	2008-09-01 08:35:14	152.198	71.8277	6.8491	19.679
2008-09-01 08:43:14	2008-09-01 08:43:14	152.164	71.8135	6.9912	19.6978
2008-09-01 08:51:15	2008-09-01 08:51:15	152.128	71.7995	7.1023	19.7128
2008-09-01 08:59:14	2008-09-01 08:59:14	152.091	71.7855	7.1977	19.6994
2008-09-01 09:07:15	2008-09-01 09:07:15	152.055	71.7716	7.2664	19.6827
2008-09-01 09:15:14	2008-09-01 09:15:14	152.02	71.7578	7.3632	19.6047
2008-09-01 09:23:15	2008-09-01 09:23:15	151.986	71.7441	7.4689	19.4818
2008-09-01 09:31:14	2008-09-01 09:31:14	151.952	71.7302	7.5653	19.3693
2008-09-01 09:39:15	2008-09-01 09:39:15	151.917	71.7164	7.6513	19.2517
2008-09-01 09:47:14	2008-09-01 09:47:14	151.883	71.703	7.7313	19.1134
2008-09-01 09:55:14	2008-09-01 09:55:14	151.849	71.69	7.7834	18.9764
2008-09-01 10:03:15	2008-09-01 10:03:15	151.844	71.68	7.8122	18.8287
2008-09-01 10:11:14	2008-09-01 10:11:14	151.858	71.6644	7.817	18.6819
2008-09-01 10:19:15	2008-09-01 10:19:15	151.873	71.6485	7.8272	18.5014
2008-09-01 10:27:14	2008-09-01 10:27:14	151.886	71.6322	7.8565	18.3195
2008-09-01 10:35:15	2008-09-01 10:35:15	151.899	71.616	7.887	18.1877
2008-09-01 10:43:14	2008-09-01 10:43:14	151.912	71.5999	7.9275	18.0676
2008-09-01 10:51:15	2008-09-01 10:51:15	151.925	71.5839	7.9822	17.9768
2008-09-01 10:59:14	2008-09-01 10:59:14	151.94	71.568	8.0515	17.9092
2008-09-01 11:07:14	2008-09-01 11:07:14	151.957	71.5518	8.089	17.8706
2008-09-01 11:15:15	2008-09-01 11:15:15	151.974	71.5355	8.1204	17.8393
2008-09-01 11:23:14	2008-09-01 11:23:14	151.989	71.5191	8.1343	17.8266
2008-09-01 11:31:15	2008-09-01 11:31:15	152.004	71.5025	8.134	17.8253
2008-09-01 11:39:14	2008-09-01 11:39:14	152.018	71.486	7.9478	17.8237
2008-09-01 11:47:15	2008-09-01 11:47:15	152.033	71.4692	7.7581	17.8285
2008-09-01 11:55:14	2008-09-01 11:55:14	152.049	71.4524	7.6162	17.8291
2008-09-01 12:03:15	2008-09-01 12:03:15	152.066	71.4357	7.5163	17.8291
2008-09-01 12:11:15	2008-09-01 12:11:15	152.085	71.4191	7.4535	17.8313
2008-09-01 12:19:14	2008-09-01 12:19:14	152.104	71.4026	7.3919	17.8367
2008-09-01 12:27:15	2008-09-01 12:27:15	152.124	71.3863	7.3347	17.8668
2008-09-01 12:35:14	2008-09-01 12:35:14	152.144	71.3702	7.2421	18.1178
2008-09-01 12:43:15	2008-09-01 12:43:15	152.163	71.3561	7.166	18.4407
2008-09-01 12:51:14	2008-09-01 12:51:14	152.166	71.3509	7.0655	18.6732
2008-09-01 12:59:15	2008-09-01 12:59:15	152.163	71.3523	6.9705	18.7537
2008-09-01 13:07:14	2008-09-01 13:07:14	152.161	71.3537	6.9463	18.6692
2008-09-01 13:15:15	2008-09-01 13:15:15	152.158	71.355	6.9693	18.4912
2008-09-01 13:23:14	2008-09-01 13:23:14	152.155	71.3564	6.9967	18.3432
2008-09-01 13:31:14	2008-09-01 13:31:14	152.152	71.3576	7.0334	18.2493
2008-09-01 13:39:15	2008-09-01 13:39:15	152.149	71.3589	7.0947	18.1817
2008-09-01 13:47:14	2008-09-01 13:47:14	152.146	71.3602	7.1219	18.1499
2008-09-01 13:55:15	2008-09-01 13:55:15	152.145	71.3619	7.1482	18.1292
2008-09-01 14:03:14	2008-09-01 14:03:14	152.144	71.3638	7.1655	18.1277
2008-09-01 14:11:15	2008-09-01 14:11:15	152.144	71.3658	7.1701	18.1539
2008-09-01 14:19:14	2008-09-01 14:19:14	152.145	71.3666	7.173	18.2063
2008-09-01 14:27:15	2008-09-01 14:27:15	152.145	71.3666	7.1735	18.2734
2008-09-01 14:35:14	2008-09-01 14:35:14	152.145	71.3666	7.1363	18.3556
2008-09-01 14:43:14	2008-09-01 14:43:14	152.145	71.3666	7.1344	18.509
2008-09-01 14:51:15	2008-09-01 14:51:15	152.145	71.3666	7.0967	18.6536
2008-09-01 14:59:14	2008-09-01 14:59:14	152.145	71.3666	7.061	18.804
2008-09-01 15:07:15	2008-09-01 15:07:15	152.145	71.3666	7.0225	18.9629
2008-09-01 15:15:14	2008-09-01 15:15:14	152.145	71.3666	6.994	19.1374
2008-09-01 15:23:15	2008-09-01 15:23:15	152.145	71.3666	6.995	19.294
2008-09-01 15:31:14	2008-09-01 15:31:14	152.145	71.3666	6.9967	19.44
2008-09-01 15:39:15	2008-09-01 15:39:15	152.145	71.3666	6.9746	19.5262
2008-09-01 15:47:14	2008-09-01 15:47:14	152.145	71.3666	6.9389	19.5836
2008-09-01 15:55:14	2008-09-01 15:55:14	152.145	71.3665	6.9134	19.621
2008-09-01 16:03:15	2008-09-01 16:03:15	152.145	71.3666	6.8956	19.6465
2008-09-01 16:11:14	2008-09-01 16:11:14	152.145	71.3666	6.8728	19.6676
2008-09-01 16:19:15	2008-09-01 16:19:15	152.145	71.3666	6.8614	19.7269
2008-09-01 16:27:14	2008-09-01 16:27:14	152.144	71.3666	6.8586	19.7292
2008-09-01 16:35:15	2008-09-01 16:35:15	152.144	71.3666	6.8467	19.7293
2008-09-01 16:43:14	2008-09-01 16:43:14	152.144	71.3666	6.8416	19.7251
2008-09-01 16:51:15	2008-09-01 16:51:15	152.144	71.3666	6.8451	19.7237
2008-09-01 16:59:14	2008-09-01 16:59:14	152.144	71.3666	6.8447	19.7208
2008-09-01 17:07:14	2008-09-01 17:07:14	152.144	71.3666	6.8584	19.7185
2008-09-01 17:15:15	2008-09-01 17:15:15	152.144	71.3666	6.8664	19.7177
2008-09-01 17:23:14	2008-09-01 17:23:14	152.143	71.3666	6.8747	19.7185
2008-09-01 17:31:15	2008-09-01 17:31:15	152.144	71.3666	6.8827	19.719
2008-09-01 17:39:14	2008-09-01 17:39:14	152.143	71.3666	6.8865	19.7202
2008-09-01 17:47:15	2008-09-01 17:47:15	152.144	71.3666	6.8869	19.7218
2008-09-01 17:55:14	2008-09-01 17:55:14	152.144	71.3666	6.8681	19.7196
2008-09-01 18:03:15	2008-09-01 18:03:15	152.144	71.3666	6.8283	19.7115
2008-09-01 18:11:15	2008-09-01 18:11:15	152.144	71.3666	6.7837	19.698
2008-09-01 18:19:14	2008-09-01 18:19:14	152.144	71.3666	6.7584	19.6775
2008-09-01 18:27:15	2008-09-01 18:27:15	152.144	71.3666	6.7581	19.6447
2008-09-01 18:35:14	2008-09-01 18:35:14	152.144	71.3666	6.7797	19.5805
2008-09-01 18:43:15	2008-09-01 18:43:15	152.145	71.3666	6.8035	19.5087
2008-09-01 18:51:14	2008-09-01 18:51:14	152.144	71.3666	6.831	19.4299
2008-09-01 18:59:15	2008-09-01 18:59:15	152.145	71.3666	6.8729	19.3823
2008-09-01 19:07:14	2008-09-01 19:07:14	152.145	71.3665	6.8996	19.3344
2008-09-01 19:15:15	2008-09-01 19:15:15	152.145	71.3666	6.9495	19.3058
2008-09-01 19:23:14	2008-09-01 19:23:14	152.145	71.3666	7.0264	18.8375
2008-09-01 19:31:14	2008-09-01 19:31:14	152.145	71.3666	7.1589	18.0667
2008-09-01 19:39:15	2008-09-01 19:39:15	152.145	71.3666	7.6542	16.7201
2008-09-01 19:47:14	2008-09-01 19:47:14	152.145	71.3666	7.9931	15.8441
2008-09-01 19:55:15	2008-09-01 19:55:15	152.145	71.3666	8.0883	15.258
2008-09-01 20:03:14	2008-09-01 20:03:14	152.145	71.3666	8.0617	14.9732
2008-09-01 20:11:15	2008-09-01 20:11:15	152.145	71.3666	7.9411	14.9866
2008-09-01 20:19:14	2008-09-01 20:19:14	152.145	71.3665	7.7532	15.9124
2008-09-01 20:27:15	2008-09-01 20:27:15	152.145	71.3665	7.6239	16.8578
2008-09-01 20:35:14	2008-09-01 20:35:14	152.145	71.3666	7.5693	17.4698
2008-09-01 20:43:14	2008-09-01 20:43:14	152.145	71.3665	7.5552	17.8176
2008-09-01 20:51:15	2008-09-01 20:51:15	152.144	71.3657	7.5463	18.0734
2008-09-01 20:59:14	2008-09-01 20:59:14	152.155	71.3574	7.5146	18.3202
2008-09-01 21:07:15	2008-09-01 21:07:15	152.184	71.3611	7.4534	18.57
2008-09-01 21:15:14	2008-09-01 21:15:14	152.259	71.3708	7.3871	18.8062
2008-09-01 21:23:15	2008-09-01 21:23:15	152.341	71.3774	7.2777	19.1008
2008-09-01 21:31:14	2008-09-01 21:31:14	152.423	71.3821	7.1302	19.4329
2008-09-01 21:39:15	2008-09-01 21:39:15	152.507	71.3863	6.9672	19.8179
2008-09-01 21:47:14	2008-09-01 21:47:14	152.589	71.3903	6.7692	20.2494
2008-09-01 21:55:14	2008-09-01 21:55:14	152.672	71.3944	6.568	20.6537
2008-09-01 22:03:15	2008-09-01 22:03:15	152.754	71.3984	6.3575	21.0368
2008-09-01 22:11:14	2008-09-01 22:11:14	152.837	71.4026	6.1935	21.3073
2008-09-01 22:19:15	2008-09-01 22:19:15	152.919	71.4066	5.9871	21.6117
2008-09-01 22:27:14	2008-09-01 22:27:14	153.002	71.4111	5.8004	21.8827
2008-09-01 22:35:15	2008-09-01 22:35:15	153.085	71.4151	5.6684	21.911
2008-09-01 22:43:14	2008-09-01 22:43:14	153.169	71.419	5.83	21.6109
2008-09-01 22:51:15	2008-09-01 22:51:15	153.251	71.4234	6.0408	21.2266
2008-09-01 22:59:14	2008-09-01 22:59:14	153.333	71.4272	6.1749	20.9919
2008-09-01 23:07:14	2008-09-01 23:07:14	153.414	71.4311	6.2673	20.8377
2008-09-01 23:15:15	2008-09-01 23:15:15	153.495	71.4361	6.3113	20.7752
2008-09-01 23:23:14	2008-09-01 23:23:14	153.577	71.4415	6.26	20.8761
2008-09-01 23:31:15	2008-09-01 23:31:15	153.658	71.4462	6.0762	21.1661
2008-09-01 23:39:14	2008-09-01 23:39:14	153.74	71.4507	6.0003	21.2146
2008-09-01 23:47:15	2008-09-01 23:47:15	153.82	71.4552	6.1379	21.0618
2008-09-01 23:55:14	2008-09-01 23:55:14	153.901	71.4594	6.2774	20.9221
2008-09-02 00:03:15	2008-09-02 00:03:15	153.981	71.4636	6.3472	20.8234
2008-09-02 00:11:15	2008-09-02 00:11:15	154.06	71.4678	6.3653	20.778
2008-09-02 00:19:14	2008-09-02 00:19:14	154.14	71.472	6.3653	20.7218
2008-09-02 00:27:15	2008-09-02 00:27:15	154.22	71.4765	6.4334	20.6215
2008-09-02 00:35:14	2008-09-02 00:35:14	154.301	71.4807	6.5056	20.5555
2008-09-02 00:43:15	2008-09-02 00:43:15	154.381	71.4846	6.5686	20.5193
2008-09-02 00:51:14	2008-09-02 00:51:14	154.461	71.4884	6.5564	20.5191
2008-09-02 00:59:15	2008-09-02 00:59:15	154.541	71.4922	6.5065	20.5514
2008-09-02 01:07:14	2008-09-02 01:07:14	154.621	71.496	6.3938	20.6351
2008-09-02 01:15:15	2008-09-02 01:15:15	154.7	71.4996	6.2386	20.7817
2008-09-02 01:23:14	2008-09-02 01:23:14	154.779	71.5032	5.9281	21.0145
2008-09-02 01:31:14	2008-09-02 01:31:14	154.859	71.507	5.7492	21.1314
2008-09-02 01:39:15	2008-09-02 01:39:15	154.938	71.5107	5.6272	21.2066
2008-09-02 01:47:14	2008-09-02 01:47:14	155.016	71.5145	5.4952	21.236
2008-09-02 01:55:15	2008-09-02 01:55:15	155.094	71.5184	5.3884	21.2507
2008-09-02 02:03:14	2008-09-02 02:03:14	155.172	71.5227	5.2804	21.2618
2008-09-02 02:11:15	2008-09-02 02:11:15	155.25	71.5272	5.2232	21.2752
2008-09-02 02:19:14	2008-09-02 02:19:14	155.328	71.532	5.1849	21.3113
2008-09-02 02:27:15	2008-09-02 02:27:15	155.407	71.5369	5.0756	21.3949
2008-09-02 02:35:14	2008-09-02 02:35:14	155.484	71.542	4.9932	21.3027
2008-09-02 02:43:14	2008-09-02 02:43:14	155.561	71.547	5.0659	21.0859
2008-09-02 02:51:15	2008-09-02 02:51:15	155.639	71.5518	5.0905	20.8657
2008-09-02 02:59:14	2008-09-02 02:59:14	155.718	71.5557	5.0927	20.7108
2008-09-02 03:07:15	2008-09-02 03:07:15	155.797	71.5596	5.0706	20.6033
2008-09-02 03:15:14	2008-09-02 03:15:14	155.876	71.5637	5.0491	20.5036
2008-09-02 03:23:15	2008-09-02 03:23:15	155.955	71.5678	5.0131	20.4531
2008-09-02 03:31:14	2008-09-02 03:31:14	156.033	71.5719	4.9349	20.4341
2008-09-02 03:39:15	2008-09-02 03:39:15	156.112	71.5757	4.8731	20.4421
2008-09-02 03:47:14	2008-09-02 03:47:14	156.192	71.5798	4.7529	20.5096
2008-09-02 03:55:14	2008-09-02 03:55:14	156.272	71.5839	4.6135	20.5148
2008-09-02 04:03:15	2008-09-02 04:03:15	156.351	71.5882	4.5079	20.5097
2008-09-02 04:11:14	2008-09-02 04:11:14	156.43	71.5925	4.4417	20.514
2008-09-02 04:19:15	2008-09-02 04:19:15	156.509	71.5966	4.3293	20.4747
2008-09-02 04:27:14	2008-09-02 04:27:14	156.589	71.6008	4.1118	20.287
2008-09-02 04:35:15	2008-09-02 04:35:15	156.668	71.605	3.871	20.0961
2008-09-02 04:43:14	2008-09-02 04:43:14	156.749	71.6093	3.7075	19.9461
2008-09-02 04:51:15	2008-09-02 04:51:15	156.829	71.6136	3.6044	19.8451
2008-09-02 04:59:14	2008-09-02 04:59:14	156.909	71.6177	3.5499	19.7832
2008-09-02 05:07:14	2008-09-02 05:07:14	156.989	71.6215	3.5818	19.8062
2008-09-02 05:15:15	2008-09-02 05:15:15	157.068	71.6251	3.6927	19.9087
2008-09-02 05:23:14	2008-09-02 05:23:14	157.147	71.6288	3.8699	20.1828
2008-09-02 05:31:15	2008-09-02 05:31:15	157.226	71.6327	3.9748	20.5291
2008-09-02 05:39:14	2008-09-02 05:39:14	157.305	71.6368	4.073	20.7432
2008-09-02 05:47:15	2008-09-02 05:47:15	157.384	71.641	4.1513	20.8662
2008-09-02 05:55:14	2008-09-02 05:55:14	157.462	71.6427	4.2008	20.9146
2008-09-02 06:03:15	2008-09-02 06:03:15	157.536	71.6336	4.2489	20.9595
2008-09-02 06:11:15	2008-09-02 06:11:15	157.612	71.6249	4.3145	21.0155
2008-09-02 06:19:14	2008-09-02 06:19:14	157.686	71.6153	4.3624	21.1375
2008-09-02 06:27:15	2008-09-02 06:27:15	157.761	71.6062	4.3808	21.5598
2008-09-02 06:35:14	2008-09-02 06:35:14	157.835	71.5972	4.365	21.9257
2008-09-02 06:43:15	2008-09-02 06:43:15	157.909	71.5881	4.3703	22.0113
2008-09-02 06:51:14	2008-09-02 06:51:14	157.983	71.5791	4.3335	21.8861
2008-09-02 06:59:15	2008-09-02 06:59:15	158.058	71.5701	4.2878	21.7346
[truncated: 2,793 more rows]

## Sheet: 2011
mon/day/yr	hh:mm	Lon (°E)	Lat (°N)	Temperature, SBE38 [C]	Salinity [PSU]
2011-09-14 16:55:38	16:55:38.006000	179.996	72.4212	1.8665	28.7846
2011-09-14 17:03:37	17:03:37.958000	179.919	72.4227	1.801	28.7216
2011-09-14 17:11:37	17:11:37.997000	179.841	72.4243	1.7502	28.4604
2011-09-14 17:19:38	17:19:38.035000	179.761	72.4256	1.7149	28.242
2011-09-14 17:27:37	17:27:37.987000	179.682	72.4272	1.6678	28.2013
2011-09-14 17:35:38	17:35:38.026000	179.604	72.4288	1.6938	28.2405
2011-09-14 17:43:37	17:43:37.978000	179.526	72.4307	1.5126	28.0054
2011-09-14 17:51:38	17:51:38.016000	179.449	72.4322	1.5006	27.6796
2011-09-14 17:59:37	17:59:37.968000	179.371	72.4335	1.415	27.5812
2011-09-14 18:07:38	18:07:38.006000	179.293	72.4354	1.4089	27.5148
2011-09-14 18:15:37	18:15:37.958000	179.216	72.4371	1.4309	27.4958
2011-09-14 18:23:37	18:23:37.997000	179.139	72.4387	1.3933	27.5418
2011-09-14 18:31:38	18:31:38.035000	179.063	72.4398	1.1814	27.4246
2011-09-14 18:39:37	18:39:37.987000	178.986	72.4412	1.087	26.9603
2011-09-14 18:47:38	18:47:38.026000	178.91	72.4429	1.0969	26.7476
2011-09-14 18:55:37	18:55:37.978000	178.833	72.4447	1.0963	26.6943
2011-09-14 19:03:38	19:03:38.016000	178.755	72.4462	1.0967	26.7195
2011-09-14 19:11:37	19:11:37.968000	178.676	72.4479	1.1011	26.7384
2011-09-14 19:19:38	19:19:38.006000	178.597	72.4498	1.0754	26.7911
2011-09-14 19:27:37	19:27:37.958000	178.519	72.4513	1.0683	26.8291
2011-09-14 19:35:37	19:35:37.997000	178.441	72.4523	0.9171	26.6574
2011-09-14 19:43:38	19:43:38.035000	178.363	72.4538	0.8728	26.351
2011-09-14 19:51:37	19:51:37.987000	178.285	72.4553	0.7913	26.3031
2011-09-14 19:59:38	19:59:38.026000	178.207	72.4567	0.6905	26.0963
2011-09-14 20:07:37	20:07:37.978000	178.129	72.4583	0.6013	25.8779
2011-09-14 20:15:38	20:15:38.016000	178.05	72.4603	0.6005	25.7458
2011-09-14 20:23:37	20:23:37.968000	177.971	72.4619	0.5849	25.6757
2011-09-14 20:31:38	20:31:38.006000	177.891	72.4634	0.6259	25.6549
2011-09-14 20:39:37	20:39:37.958000	177.812	72.465	0.5809	25.6886
2011-09-14 20:47:37	20:47:37.997000	177.733	72.4667	0.5513	25.6537
2011-09-14 20:55:38	20:55:38.035000	177.654	72.468	0.5406	25.6645
2011-09-14 21:03:37	21:03:37.987000	177.575	72.4693	0.4441	25.7284
2011-09-14 21:11:38	21:11:38.026000	177.495	72.471	0.3545	25.8178
2011-09-14 21:19:37	21:19:37.978000	177.416	72.4727	0.3019	25.8729
2011-09-14 21:27:38	21:27:38.016000	177.336	72.4743	0.2039	25.8399
2011-09-14 21:35:37	21:35:37.968000	177.257	72.4758	0.2277	25.7478
2011-09-14 21:43:38	21:43:38.006000	177.177	72.4774	0.2263	25.9066
2011-09-14 21:51:37	21:51:37.958000	177.098	72.4789	0.3919	25.9338
2011-09-14 21:59:37	21:59:37.997000	177.019	72.4804	0.4675	25.9698
2011-09-14 22:07:38	22:07:38.035000	176.941	72.482	0.2975	26.0879
2011-09-14 22:15:37	22:15:37.987000	176.862	72.4836	0.264	26.0757
2011-09-14 22:23:38	22:23:38.026000	176.784	72.4851	0.1283	26.0955
2011-09-14 22:31:37	22:31:37.978000	176.706	72.4865	-0.0971	26.1854
2011-09-14 22:39:38	22:39:38.016000	176.627	72.488	-0.1586	26.1655
2011-09-14 22:47:37	22:47:37.968000	176.548	72.4894	-0.1918	26.1194
2011-09-14 22:55:38	22:55:38.006000	176.469	72.4911	-0.1537	26.281
2011-09-14 23:03:37	23:03:37.958000	176.39	72.4927	-0.1765	26.4051
2011-09-14 23:11:37	23:11:37.997000	176.314	72.497	-0.157	26.3751
2011-09-14 23:19:38	23:19:38.035000	176.243	72.5074	-0.1125	26.3033
2011-09-14 23:27:37	23:27:37.987000	176.174	72.5187	-0.1009	26.2468
2011-09-14 23:35:38	23:35:38.026000	176.104	72.5302	-0.1135	26.2323
2011-09-14 23:43:37	23:43:37.978000	176.034	72.5415	-0.1168	26.258
2011-09-14 23:51:38	23:51:38.016000	175.964	72.5525	-0.1046	26.3001
2011-09-14 23:59:37	23:59:37.968000	175.893	72.5634	0.0262	26.2866
2011-09-15 00:07:38	00:07:38.006000	175.823	72.5744	0.1037	26.1889
2011-09-15 00:15:37	00:15:37.958000	175.753	72.586	0.1264	26.1089
2011-09-15 00:23:37	00:23:37.997000	175.682	72.5972	0.1356	26.0829
2011-09-15 00:31:38	00:31:38.035000	175.611	72.6084	0.1344	26.0841
2011-09-15 00:39:37	00:39:37.987000	175.541	72.6194	0.1204	26.0996
2011-09-15 00:47:38	00:47:38.026000	175.469	72.6306	0.0943	26.1068
2011-09-15 00:55:37	00:55:37.978000	175.425	72.6371	0.0681	26.1109
2011-09-15 01:03:38	01:03:38.016000	175.407	72.6399	0.0587	26.1176
2011-09-15 01:11:37	01:11:37.968000	175.407	72.6398	0.0472	26.1271
2011-09-15 01:19:38	01:19:38.006000	175.406	72.6398	0.052	26.1551
2011-09-15 01:27:37	01:27:37.958000	175.406	72.6401	0.0408	26.183
2011-09-15 01:35:37	01:35:37.997000	175.405	72.6404	0.0462	26.2127
2011-09-15 01:43:38	01:43:38.035000	175.373	72.6396	0.069	26.239
2011-09-15 01:51:37	01:51:37.987000	175.333	72.6407	0.0517	26.2182
2011-09-15 01:59:38	01:59:38.026000	175.291	72.6404	0.0174	26.2362
2011-09-15 02:07:37	02:07:37.978000	175.25	72.6399	-0.0006	26.2909
2011-09-15 02:15:38	02:15:38.016000	175.209	72.6398	-0.0023	26.3751
2011-09-15 02:23:37	02:23:37.968000	175.169	72.6388	0.0069	26.4302
2011-09-15 02:31:38	02:31:38.006000	175.13	72.6387	-0.0046	26.4925
2011-09-15 02:39:37	02:39:37.958000	175.089	72.6394	0.0068	26.5164
2011-09-15 02:47:37	02:47:37.997000	175.048	72.6398	0.0163	26.5248
2011-09-15 02:55:38	02:55:38.035000	175.006	72.64	-0.0366	26.5694
2011-09-15 03:03:37	03:03:37.987000	174.965	72.6401	-0.052	26.5877
2011-09-15 03:11:38	03:11:38.026000	174.923	72.6402	-0.0992	26.6302
2011-09-15 03:19:37	03:19:37.978000	174.881	72.6401	-0.0551	26.654
2011-09-15 03:27:38	03:27:38.016000	174.84	72.6402	-0.0283	26.6268
2011-09-15 03:35:37	03:35:37.968000	174.8	72.6402	0	26.5466
2011-09-15 03:43:38	03:43:38.006000	174.759	72.64	0.0198	26.6838
2011-09-15 03:51:37	03:51:37.958000	174.718	72.6399	-0.2067	26.7369
2011-09-15 03:59:37	03:59:37.997000	174.677	72.6399	-0.4028	26.6992
2011-09-15 04:07:38	04:07:38.035000	174.635	72.6401	-0.4488	26.5925
2011-09-15 04:15:37	04:15:37.987000	174.595	72.6408	-0.4734	26.5432
2011-09-15 04:23:38	04:23:38.026000	174.585	72.6416	-0.4717	26.5097
2011-09-15 04:31:37	04:31:37.978000	174.537	72.6431	-0.4808	26.5159
2011-09-15 04:39:38	04:39:38.016000	174.472	72.6435	-0.4585	26.5209
2011-09-15 04:47:37	04:47:37.968000	174.397	72.6419	-0.4216	26.5227
2011-09-15 04:55:38	04:55:38.006000	174.318	72.6438	-0.4906	26.5425
2011-09-15 05:03:37	05:03:37.958000	174.238	72.6428	-0.5312	26.5374
2011-09-15 05:11:37	05:11:37.997000	174.159	72.6416	-0.5649	26.5411
2011-09-15 05:19:38	05:19:38.035000	174.081	72.6408	-0.539	26.6154
2011-09-15 05:27:37	05:27:37.987000	174.001	72.6402	-0.5839	26.7897
2011-09-15 05:35:38	05:35:38.026000	173.923	72.6403	-0.5953	26.8259
2011-09-15 05:43:37	05:43:37.978000	173.844	72.6403	-0.6523	26.8013
2011-09-15 05:51:38	05:51:38.016000	173.768	72.6377	-0.6875	26.7578
2011-09-15 05:59:37	05:59:37.968000	173.695	72.64	-0.6935	26.7648
2011-09-15 06:07:38	06:07:38.006000	173.709	72.6362	-0.6362	26.3553
2011-09-15 06:15:37	06:15:37.958000	173.732	72.6145	-0.6552	26.1761
2011-09-15 06:23:37	06:23:37.997000	173.774	72.5941	-0.687	26.1085
2011-09-15 06:31:38	06:31:38.035000	173.776	72.5807	-0.7103	26.0942
2011-09-15 06:39:37	06:39:37.987000	173.758	72.5701	-0.7464	26.1171
2011-09-15 06:47:38	06:47:38.026000	173.76	72.5527	-0.6913	26.3614
2011-09-15 06:55:37	06:55:37.978000	173.811	72.5357	-0.6708	26.2938
2011-09-15 07:03:38	07:03:38.016000	173.844	72.5147	-0.6709	26.2372
2011-09-15 07:11:37	07:11:37.968000	173.844	72.4909	-0.6327	26.1862
2011-09-15 07:19:38	07:19:38.006000	173.841	72.4669	-0.6556	26.17
2011-09-15 07:27:37	07:27:37.958000	173.807	72.4459	-0.6447	26.0283
2011-09-15 07:35:37	07:35:37.997000	173.775	72.4297	-0.6759	26.0075
2011-09-15 07:43:38	07:43:38.035000	173.766	72.4142	-0.6863	26.0574
2011-09-15 07:51:37	07:51:37.987000	173.764	72.3945	-0.6823	26.1023
2011-09-15 07:59:38	07:59:38.026000	173.792	72.3726	-0.6891	26.1062
2011-09-15 08:07:37	08:07:37.978000	173.825	72.3499	-0.6758	26.0254
2011-09-15 08:15:38	08:15:38.016000	173.859	72.33	-0.5724	25.9838
2011-09-15 08:23:37	08:23:37.968000	173.899	72.3093	-0.557	26.0737
2011-09-15 08:31:38	08:31:38.006000	173.907	72.2861	-0.5307	26.0887
2011-09-15 08:39:37	08:39:37.958000	173.893	72.2628	-0.3957	26.0898
2011-09-15 08:47:37	08:47:37.997000	173.85	72.2429	0.3962	25.9039
2011-09-15 08:55:38	08:55:38.035000	173.806	72.2236	0.33	26.1477
2011-09-15 09:03:37	09:03:37.987000	173.74	72.2166	0.745	26.2054
2011-09-15 09:11:38	09:11:38.026000	173.661	72.2187	0.9108	26.3724
2011-09-15 09:19:37	09:19:37.978000	173.582	72.2209	0.923	26.4739
2011-09-15 09:27:38	09:27:38.016000	173.503	72.2231	0.8856	26.5244
2011-09-15 09:35:37	09:35:37.968000	173.425	72.2268	0.1617	26.7888
2011-09-15 09:43:38	09:43:38.006000	173.349	72.2312	-0.0074	26.4527
2011-09-15 09:51:37	09:51:37.958000	173.274	72.2355	-0.2561	26.431
2011-09-15 09:59:37	09:59:37.997000	173.198	72.2402	-0.4223	26.2667
2011-09-15 10:07:38	10:07:38.035000	173.121	72.2443	-0.312	26.0959
2011-09-15 10:15:37	10:15:37.987000	173.04	72.2479	-0.273	26.125
2011-09-15 10:23:38	10:23:38.026000	172.959	72.2523	-0.4611	26.2419
2011-09-15 10:31:37	10:31:37.978000	172.882	72.2573	-0.3662	26.0564
2011-09-15 10:39:38	10:39:38.016000	172.805	72.2577	-0.2545	26.0208
2011-09-15 10:47:37	10:47:37.968000	172.729	72.2523	-0.1585	26.0156
2011-09-15 10:55:38	10:55:38.006000	172.648	72.2506	-0.3855	26.0767
2011-09-15 11:03:37	11:03:37.958000	172.568	72.251	-0.4904	25.9333
2011-09-15 11:11:37	11:11:37.997000	172.491	72.2458	-0.521	25.8466
2011-09-15 11:19:38	11:19:38.035000	172.43	72.2289	-0.3475	25.7728
2011-09-15 11:27:37	11:27:37.987000	172.417	72.212	-0.2832	25.8168
2011-09-15 11:35:38	11:35:38.026000	172.441	72.2012	-0.1532	25.8201
2011-09-15 11:43:37	11:43:37.978000	172.458	72.1896	-0.1906	25.8588
2011-09-15 11:51:38	11:51:38.016000	172.447	72.177	-0.3256	25.9599
2011-09-15 11:59:37	11:59:37.968000	172.422	72.1597	-0.3204	25.7151
2011-09-15 12:07:38	12:07:38.006000	172.397	72.1416	-0.3133	25.5815
2011-09-15 12:15:37	12:15:37.958000	172.371	72.1237	-0.3047	25.5236
2011-09-15 12:23:37	12:23:37.997000	172.333	72.1073	-0.3111	25.5048
2011-09-15 12:31:38	12:31:38.035000	172.284	72.0916	-0.3545	25.4995
2011-09-15 12:39:37	12:39:37.987000	172.22	72.0814	-0.3821	25.47
2011-09-15 12:47:38	12:47:38.026000	172.163	72.0694	-0.2845	25.4238
2011-09-15 12:55:37	12:55:37.978000	172.105	72.0623	-0.2667	25.4905
2011-09-15 13:03:38	13:03:38.016000	172.067	72.0587	-0.3088	25.584
2011-09-15 13:11:37	13:11:37.968000	172.056	72.0577	-0.3196	25.5594
2011-09-15 13:19:38	13:19:38.006000	172.058	72.0573	-0.2117	25.5268
2011-09-15 13:27:37	13:27:37.958000	172.058	72.0571	-0.1895	25.569
2011-09-15 13:35:37	13:35:37.997000	172.056	72.0565	-0.2067	25.6336
2011-09-15 13:43:38	13:43:38.035000	172.056	72.0566	-0.1485	25.6175
2011-09-15 13:51:37	13:51:37.987000	172.058	72.0568	-0.1149	25.6605
2011-09-15 13:59:38	13:59:38.026000	172.053	72.0568	-0.1628	25.7035
2011-09-15 14:07:37	14:07:37.978000	171.998	72.0541	-0.2307	25.6717
2011-09-15 14:15:38	14:15:38.016000	171.943	72.0514	-0.2368	25.5978
2011-09-15 14:23:37	14:23:37.968000	171.914	72.0444	-0.1912	25.6026
2011-09-15 14:31:38	14:31:38.006000	171.91	72.0299	-0.1651	25.6696
2011-09-15 14:39:37	14:39:37.958000	171.907	72.0158	0.1251	25.5688
2011-09-15 14:47:37	14:47:37.997000	171.888	72.0023	0.38	26.0072
2011-09-15 14:55:38	14:55:38.035000	171.858	71.9907	0.385	26.2567
2011-09-15 15:03:37	15:03:37.987000	171.823	71.9802	0.4377	26.323
2011-09-15 15:11:38	15:11:38.026000	171.799	71.9682	0.7067	26.1808
2011-09-15 15:19:37	15:19:37.978000	171.779	71.9559	0.7934	26.3185
2011-09-15 15:27:38	15:27:38.016000	171.764	71.9428	0.8332	26.4708
2011-09-15 15:35:37	15:35:37.968000	171.749	71.9266	0.8778	26.5504
2011-09-15 15:43:38	15:43:38.006000	171.716	71.9125	0.968	26.584
2011-09-15 15:51:37	15:51:37.958000	171.66	71.9035	1.1439	26.6491
2011-09-15 15:59:37	15:59:37.997000	171.607	71.8919	1.1993	26.8711
2011-09-15 16:07:38	16:07:38.035000	171.558	71.8784	1.1107	27.0688
2011-09-15 16:15:37	16:15:37.987000	171.508	71.8652	1.2044	26.9919
2011-09-15 16:23:38	16:23:38.026000	171.453	71.8501	1.2969	27.11
2011-09-15 16:31:37	16:31:37.978000	171.396	71.8344	1.3023	27.2667
2011-09-15 16:39:38	16:39:38.016000	171.332	71.8192	1.35	27.2885
2011-09-15 16:47:37	16:47:37.968000	171.266	71.8044	1.4004	27.3416
2011-09-15 16:55:38	16:55:38.006000	171.185	71.8002	1.4441	27.3968
2011-09-15 17:03:37	17:03:37.958000	171.102	71.8003	1.4544	27.4759
2011-09-15 17:11:37	17:11:37.997000	171.018	71.8008	1.4407	27.488
2011-09-15 17:19:38	17:19:38.035000	170.935	71.8017	1.4262	27.5079
2011-09-15 17:27:37	17:27:37.987000	170.852	71.8029	1.469	27.5216
2011-09-15 17:35:38	17:35:38.026000	170.768	71.8033	1.5086	27.5528
2011-09-15 17:43:37	17:43:37.978000	170.688	71.803	1.581	27.5615
2011-09-15 17:51:38	17:51:38.016000	170.608	71.8017	1.6563	27.7546
2011-09-15 17:59:37	17:59:37.968000	170.53	71.7987	1.7187	27.9003
2011-09-15 18:07:38	18:07:38.006000	170.454	71.793	1.5867	28.1083
2011-09-15 18:15:37	18:15:37.958000	170.374	71.7874	1.1694	27.8448
2011-09-15 18:23:37	18:23:37.997000	170.293	71.7841	1.2088	27.3479
2011-09-15 18:31:38	18:31:38.035000	170.212	71.7833	1.4545	27.2556
2011-09-15 18:39:37	18:39:37.987000	170.133	71.7834	1.3102	27.4017
2011-09-15 18:47:38	18:47:38.026000	170.055	71.7845	1.3171	27.4778
2011-09-15 18:55:37	18:55:37.978000	169.978	71.7837	1.2049	27.4903
2011-09-15 19:03:38	19:03:38.016000	169.902	71.782	0.9566	27.3308
2011-09-15 19:11:37	19:11:37.968000	169.824	71.7811	0.8099	26.9277
2011-09-15 19:19:38	19:19:38.006000	169.744	71.7808	0.745	26.7117
2011-09-15 19:27:37	19:27:37.958000	169.663	71.7812	0.6452	26.4794
2011-09-15 19:35:37	19:35:37.997000	169.582	71.7814	0.7836	26.3309
2011-09-15 19:43:38	19:43:38.035000	169.503	71.779	0.9311	26.5316
2011-09-15 19:51:37	19:51:37.987000	169.423	71.777	0.7833	26.8069
2011-09-15 19:59:38	19:59:38.026000	169.343	71.7751	0.7477	26.7527
2011-09-15 20:07:37	20:07:37.978000	169.263	71.7748	0.7136	26.6118
2011-09-15 20:15:38	20:15:38.016000	169.21	71.7567	0.6479	26.4667
2011-09-15 20:23:37	20:23:37.968000	169.158	71.7377	0.6793	26.3555
2011-09-15 20:31:38	20:31:38.006000	169.107	71.719	0.6985	26.4139
2011-09-15 20:39:37	20:39:37.958000	169.056	71.7007	0.7619	26.456
2011-09-15 20:47:37	20:47:37.997000	168.991	71.6911	0.9136	26.4779
2011-09-15 20:55:38	20:55:38.035000	168.914	71.6933	1.1528	26.5322
2011-09-15 21:03:37	21:03:37.987000	168.838	71.6989	1.168	26.6375
2011-09-15 21:11:38	21:11:38.026000	168.762	71.7054	1.1718	26.6361
2011-09-15 21:19:37	21:19:37.978000	168.685	71.7121	1.1964	26.6172
2011-09-15 21:27:38	21:27:38.016000	168.608	71.7182	1.2167	26.6457
2011-09-15 21:35:37	21:35:37.968000	168.533	71.7238	1.3518	26.6316
2011-09-15 21:43:38	21:43:38.006000	168.458	71.7299	1.4318	26.6303
2011-09-15 21:51:37	21:51:37.958000	168.382	71.7359	1.4872	26.6416
2011-09-15 21:59:37	21:59:37.997000	168.308	71.742	1.5197	26.7349
2011-09-15 22:07:38	22:07:38.035000	168.233	71.7476	1.3302	26.8775
2011-09-15 22:15:37	22:15:37.987000	168.157	71.754	1.3642	26.7623
2011-09-15 22:23:38	22:23:38.026000	168.081	71.761	1.2685	26.7592
2011-09-15 22:31:37	22:31:37.978000	168.006	71.768	1.3241	26.6478
2011-09-15 22:39:38	22:39:38.016000	167.93	71.7732	1.5027	26.5982
2011-09-15 22:47:37	22:47:37.968000	167.853	71.7791	1.5419	26.6531
2011-09-15 22:55:38	22:55:38.006000	167.778	71.785	1.6516	26.7146
2011-09-15 23:03:37	23:03:37.958000	167.703	71.7908	1.7501	26.8144
2011-09-15 23:11:37	23:11:37.997000	167.627	71.7971	1.814	26.941
2011-09-15 23:19:38	23:19:38.035000	167.552	71.8035	1.8389	27.1688
2011-09-15 23:27:37	23:27:37.987000	167.476	71.81	1.855	27.2473
2011-09-15 23:35:38	23:35:38.026000	167.4	71.8155	1.8584	27.3175
2011-09-15 23:43:37	23:43:37.978000	167.324	71.8216	1.8774	27.5389
2011-09-15 23:51:38	23:51:38.016000	167.247	71.8278	1.851	27.6438
2011-09-15 23:59:37	23:59:37.968000	167.171	71.8342	1.8709	27.6244
2011-09-16 00:07:38	00:07:38.006000	167.096	71.8405	1.8969	27.6104
2011-09-16 00:15:37	00:15:37.958000	167.033	71.8457	1.8967	27.6265
2011-09-16 00:23:37	00:23:37.997000	166.994	71.8487	1.95	27.6729
2011-09-16 00:31:38	00:31:38.035000	166.955	71.8515	1.9342	27.758
2011-09-16 00:39:37	00:39:37.987000	166.916	71.8544	1.9522	27.8271
2011-09-16 00:47:38	00:47:38.026000	166.876	71.8576	1.9536	27.9118
2011-09-16 00:55:37	00:55:37.978000	166.837	71.8609	1.9581	28.0523
2011-09-16 01:03:38	01:03:38.016000	166.798	71.8644	1.9506	28.1017
2011-09-16 01:11:37	01:11:37.968000	166.771	71.8668	1.9393	28.1039
2011-09-16 01:19:38	01:19:38.006000	166.765	71.8663	1.9358	28.1154
2011-09-16 01:27:37	01:27:37.958000	166.762	71.8652	1.9317	28.1292
2011-09-16 01:35:37	01:35:37.997000	166.757	71.8639	1.9297	28.1266
2011-09-16 01:43:38	01:43:38.035000	166.753	71.8626	1.9243	28.1261
2011-09-16 01:51:37	01:51:37.987000	166.749	71.8614	1.9215	28.1195
2011-09-16 01:59:38	01:59:38.026000	166.744	71.8603	1.9315	28.1007
2011-09-16 02:07:37	02:07:37.978000	166.739	71.8592	1.9556	28.1014
2011-09-16 02:15:38	02:15:38.016000	166.723	71.8609	1.976	28.1109
2011-09-16 02:23:37	02:23:37.968000	166.655	71.8668	1.9756	28.1325
2011-09-16 02:31:38	02:31:38.006000	166.578	71.8732	1.9612	28.1527
2011-09-16 02:39:37	02:39:37.958000	166.501	71.8796	1.9897	28.1862
2011-09-16 02:47:37	02:47:37.997000	166.424	71.8861	2.0111	28.1835
2011-09-16 02:55:38	02:55:38.035000	166.347	71.8925	2.0373	28.0138
2011-09-16 03:03:37	03:03:37.987000	166.271	71.8992	2.0606	27.8926
2011-09-16 03:11:38	03:11:38.026000	166.193	71.9054	2.0733	27.8669
2011-09-16 03:19:37	03:19:37.978000	166.116	71.9117	2.0761	27.892
2011-09-16 03:27:38	03:27:38.016000	166.039	71.9183	2.0747	27.9602
2011-09-16 03:35:37	03:35:37.968000	165.962	71.9247	2.0182	28.0685
2011-09-16 03:43:38	03:43:38.006000	165.885	71.9312	1.9869	28.1171
2011-09-16 03:51:37	03:51:37.958000	165.808	71.9376	1.9752	28.1505
2011-09-16 03:59:37	03:59:37.997000	165.731	71.9441	2.0068	28.1014
2011-09-16 04:07:38	04:07:38.035000	165.654	71.9505	1.9729	28.0853
2011-09-16 04:15:37	04:15:37.987000	165.577	71.9569	1.9557	28.1529
2011-09-16 04:23:38	04:23:38.026000	165.499	71.9632	1.9539	28.2208
2011-09-16 04:31:37	04:31:37.978000	165.422	71.9698	1.9631	28.2268
2011-09-16 04:39:38	04:39:38.016000	165.345	71.9765	2.0574	28.0199
2011-09-16 04:47:37	04:47:37.968000	165.268	71.9826	2.0681	27.8429
2011-09-16 04:55:38	04:55:38.006000	165.192	71.9891	2.0783	27.785
2011-09-16 05:03:37	05:03:37.958000	165.116	71.9954	2.0921	27.7506
2011-09-16 05:11:37	05:11:37.997000	165.039	72.0017	2.0831	27.7353
2011-09-16 05:19:38	05:19:38.035000	164.961	72.0082	2.0786	27.7219
2011-09-16 05:27:37	05:27:37.987000	164.883	72.0151	2.078	27.716
2011-09-16 05:35:38	05:35:38.026000	164.806	72.0218	2.074	27.7272
2011-09-16 05:43:37	05:43:37.978000	164.729	72.0281	2.0723	27.7668
2011-09-16 05:51:38	05:51:38.016000	164.651	72.0344	2.0603	27.7622
2011-09-16 05:59:37	05:59:37.968000	164.573	72.0405	2.0659	27.7315
2011-09-16 06:07:38	06:07:38.006000	164.495	72.0472	2.06	27.6064
2011-09-16 06:15:37	06:15:37.958000	164.418	72.0535	2.0758	27.5468
2011-09-16 06:23:37	06:23:37.997000	164.341	72.0599	2.0689	27.5341
2011-09-16 06:31:38	06:31:38.035000	164.264	72.0666	2.0844	27.506
2011-09-16 06:39:37	06:39:37.987000	164.188	72.0734	2.0492	27.5242
2011-09-16 06:47:38	06:47:38.026000	164.11	72.08	2.0413	27.5244
2011-09-16 06:55:37	06:55:37.978000	164.033	72.0864	2.079	27.5718
2011-09-16 07:03:38	07:03:38.016000	163.955	72.0925	2.1208	27.6327
2011-09-16 07:11:37	07:11:37.968000	163.879	72.0986	2.1246	27.6792
2011-09-16 07:19:38	07:19:38.006000	163.801	72.1048	2.1276	27.6269
2011-09-16 07:27:37	07:27:37.958000	163.723	72.111	2.1179	27.6016
2011-09-16 07:35:37	07:35:37.997000	163.645	72.1172	2.1074	27.5829
2011-09-16 07:43:38	07:43:38.035000	163.567	72.1236	2.1278	27.5425
2011-09-16 07:51:37	07:51:37.987000	163.49	72.1303	2.1529	27.5525
2011-09-16 07:59:38	07:59:38.026000	163.413	72.1371	2.1785	27.5989
2011-09-16 08:07:37	08:07:37.978000	163.336	72.1443	2.2023	27.6393
2011-09-16 08:15:38	08:15:38.016000	163.259	72.1508	2.1906	27.6831
2011-09-16 08:23:37	08:23:37.968000	163.183	72.1564	2.1606	27.6778
2011-09-16 08:31:38	08:31:38.006000	163.105	72.1619	2.1338	28.0706
2011-09-16 08:39:37	08:39:37.958000	163.026	72.1688	2.1388	28.1328
2011-09-16 08:47:37	08:47:37.997000	162.959	72.1747	2.3297	28.1506
2011-09-16 08:55:38	08:55:38.035000	162.899	72.1794	2.3669	28.2497
2011-09-16 09:03:37	09:03:37.987000	162.888	72.1794	2.4049	28.1981
2011-09-16 09:11:38	09:11:38.026000	162.883	72.1795	2.4549	28.2108
2011-09-16 09:19:37	09:19:37.978000	162.88	72.1789	2.4299	28.2845
2011-09-16 09:27:38	09:27:38.016000	162.878	72.1784	2.2214	28.4155
2011-09-16 09:35:37	09:35:37.968000	162.836	72.1826	2.1762	28.4186
2011-09-16 09:43:38	09:43:38.006000	162.757	72.1893	2.1502	28.4172
2011-09-16 09:51:37	09:51:37.958000	162.678	72.1962	2.1873	28.1218
2011-09-16 09:59:37	09:59:37.997000	162.599	72.2031	2.1296	27.6974
2011-09-16 10:07:38	10:07:38.035000	162.52	72.2104	2.2287	27.5673
2011-09-16 10:15:37	10:15:37.987000	162.44	72.2178	2.2574	27.3781
2011-09-16 10:23:38	10:23:38.026000	162.36	72.2252	2.2781	27.2979
2011-09-16 10:31:37	10:31:37.978000	162.281	72.2319	2.2565	27.2383
2011-09-16 10:39:38	10:39:38.016000	162.203	72.2389	2.1888	27.2817
2011-09-16 10:47:37	10:47:37.968000	162.124	72.2461	2.0152	27.5719
2011-09-16 10:55:38	10:55:38.006000	162.046	72.2533	1.9655	27.8624
2011-09-16 11:03:37	11:03:37.958000	161.967	72.26	1.8975	28.027
2011-09-16 11:11:37	11:11:37.997000	161.888	72.2667	1.8475	28.3236
2011-09-16 11:19:38	11:19:38.035000	161.809	72.2738	1.9287	28.3516
2011-09-16 11:27:37	11:27:37.987000	161.73	72.2812	2.0501	28.1321
2011-09-16 11:35:38	11:35:38.026000	161.651	72.2883	2.0952	27.8512
2011-09-16 11:43:37	11:43:37.978000	161.573	72.2951	2.1314	27.6612
2011-09-16 11:51:38	11:51:38.016000	161.494	72.3022	2.1455	27.638
2011-09-16 11:59:37	11:59:37.968000	161.416	72.3091	2.077	27.6734
2011-09-16 12:07:38	12:07:38.006000	161.34	72.3159	2.102	27.8119
2011-09-16 12:15:37	12:15:37.958000	161.263	72.3229	2.0989	27.8699
2011-09-16 12:23:37	12:23:37.997000	161.185	72.3294	2.081	27.8646
2011-09-16 12:31:38	12:31:38.035000	161.108	72.3364	2.112	28.0103
2011-09-16 12:39:37	12:39:37.987000	161.031	72.3432	2.1194	28.1073
2011-09-16 12:47:38	12:47:38.026000	160.954	72.3501	2.1498	28.2002
2011-09-16 12:55:37	12:55:37.978000	160.877	72.357	2.1291	28.3259
2011-09-16 13:03:38	13:03:38.016000	160.799	72.3639	2.1557	28.3537
2011-09-16 13:11:37	13:11:37.968000	160.722	72.3707	2.1795	28.3437
2011-09-16 13:19:38	13:19:38.006000	160.643	72.3775	2.2337	28.2963
2011-09-16 13:27:37	13:27:37.958000	160.565	72.3842	2.2977	28.3595
2011-09-16 13:35:37	13:35:37.997000	160.487	72.3915	2.3221	28.4303
2011-09-16 13:43:38	13:43:38.035000	160.409	72.3987	2.3325	28.4507
2011-09-16 13:51:37	13:51:37.987000	160.33	72.4055	2.3207	28.3883
2011-09-16 13:59:38	13:59:38.026000	160.251	72.4125	2.3205	28.3947
2011-09-16 14:07:37	14:07:37.978000	160.173	72.4194	2.3174	28.4459
2011-09-16 14:15:38	14:15:38.016000	160.094	72.4263	2.3033	28.5133
2011-09-16 14:23:37	14:23:37.968000	160.015	72.4332	2.2597	28.5436
2011-09-16 14:31:38	14:31:38.006000	159.936	72.4403	2.2729	28.5944
2011-09-16 14:39:37	14:39:37.958000	159.858	72.4476	2.2835	28.6389
2011-09-16 14:47:37	14:47:37.997000	159.779	72.4547	2.3049	28.6558
2011-09-16 14:55:38	14:55:38.035000	159.7	72.4615	2.3633	28.6788
2011-09-16 15:03:37	15:03:37.987000	159.621	72.4683	2.4123	28.7322
2011-09-16 15:11:38	15:11:38.026000	159.542	72.4752	2.4271	28.7576
2011-09-16 15:19:37	15:19:37.978000	159.463	72.482	2.416	28.7679
2011-09-16 15:27:38	15:27:38.016000	159.384	72.4889	2.4229	28.7519
2011-09-16 15:35:37	15:35:37.968000	159.305	72.4959	2.4324	28.7412
2011-09-16 15:43:38	15:43:38.006000	159.226	72.5028	2.4309	28.7506
2011-09-16 15:51:37	15:51:37.958000	159.147	72.5098	2.4255	28.7621
2011-09-16 15:59:37	15:59:37.997000	159.068	72.5169	2.4029	28.7671
2011-09-16 16:07:38	16:07:38.035000	158.988	72.5238	2.3744	28.7728
2011-09-16 16:15:37	16:15:37.987000	158.909	72.5308	2.377	28.7732
2011-09-16 16:23:38	16:23:38.026000	158.83	72.5378	2.3869	28.772
2011-09-16 16:31:37	16:31:37.978000	158.75	72.5445	2.3592	28.7937
2011-09-16 16:39:38	16:39:38.016000	158.671	72.5516	2.3291	28.809
2011-09-16 16:47:37	16:47:37.968000	158.6	72.5579	2.2818	28.8107
2011-09-16 16:55:38	16:55:38.006000	158.555	72.5618	2.2578	28.8236
2011-09-16 17:03:37	17:03:37.958000	158.509	72.5661	2.2592	28.7928
2011-09-16 17:11:37	17:11:37.997000	158.499	72.5671	2.2713	28.7959
2011-09-16 17:19:38	17:19:38.035000	158.499	72.5661	2.27	28.8023
2011-09-16 17:27:37	17:27:37.987000	158.5	72.5659	2.268	28.7973
2011-09-16 17:35:38	17:35:38.026000	158.499	72.5672	2.2661	28.7945
2011-09-16 17:43:37	17:43:37.978000	158.499	72.5691	2.2704	28.8014
2011-09-16 17:51:38	17:51:38.016000	158.493	72.5704	2.2749	28.7849
2011-09-16 17:59:37	17:59:37.968000	158.431	72.5744	2.2695	28.8047
2011-09-16 18:07:38	18:07:38.006000	158.35	72.5798	2.281	28.7944
2011-09-16 18:15:37	18:15:37.958000	158.27	72.5857	2.3024	28.7861
2011-09-16 18:23:37	18:23:37.997000	158.191	72.5924	2.3184	28.7807
2011-09-16 18:31:38	18:31:38.035000	158.112	72.599	2.3856	28.7593
2011-09-16 18:39:37	18:39:37.987000	158.032	72.6055	2.4662	28.7625
2011-09-16 18:47:38	18:47:38.026000	157.952	72.612	2.5889	28.7662
2011-09-16 18:55:37	18:55:37.978000	157.872	72.6185	2.7242	28.7349
2011-09-16 19:03:38	19:03:38.016000	157.792	72.6249	2.7977	28.6981
2011-09-16 19:11:37	19:11:37.968000	157.713	72.6313	2.8183	28.6836
2011-09-16 19:19:38	19:19:38.006000	157.633	72.6377	2.8228	28.6965
2011-09-16 19:27:37	19:27:37.958000	157.553	72.6443	2.9459	28.6464
2011-09-16 19:35:37	19:35:37.997000	157.473	72.651	3.032	28.5298
2011-09-16 19:43:38	19:43:38.035000	157.393	72.6575	3.0881	28.4041
2011-09-16 19:51:37	19:51:37.987000	157.314	72.6641	3.1464	28.3282
2011-09-16 19:59:38	19:59:38.026000	157.235	72.6706	3.2148	28.2462
2011-09-16 20:07:37	20:07:37.978000	157.156	72.6772	3.2623	28.1866
2011-09-16 20:15:38	20:15:38.016000	157.077	72.6836	3.2742	28.1533
2011-09-16 20:23:37	20:23:37.968000	156.998	72.69	3.2469	28.1262
2011-09-16 20:31:38	20:31:38.006000	156.919	72.6964	3.1768	28.0962
2011-09-16 20:39:37	20:39:37.958000	156.839	72.7028	3.1036	28.0351
2011-09-16 20:47:37	20:47:37.997000	156.76	72.7092	3.0256	27.9345
2011-09-16 20:55:38	20:55:38.035000	156.679	72.7156	2.8536	27.6252
2011-09-16 21:03:37	21:03:37.987000	156.598	72.7221	2.6471	26.8678
2011-09-16 21:11:38	21:11:38.026000	156.518	72.7285	2.4557	26.4249
2011-09-16 21:19:37	21:19:37.978000	156.438	72.7347	2.1798	25.8622
2011-09-16 21:27:38	21:27:38.016000	156.359	72.7412	1.6935	25.1528
2011-09-16 21:35:37	21:35:37.968000	156.281	72.7475	1.2033	23.6823
2011-09-16 21:43:38	21:43:38.006000	156.204	72.7537	1.1129	23.126
2011-09-16 21:51:37	21:51:37.958000	156.127	72.7599	1.0524	23.0296
2011-09-16 21:59:37	21:59:37.997000	156.049	72.7658	0.9128	22.6926
2011-09-16 22:07:38	22:07:38.035000	155.972	72.7724	0.8338	22.3878
2011-09-16 22:15:37	22:15:37.987000	155.895	72.7795	0.8005	22.3984
2011-09-16 22:23:38	22:23:38.026000	155.817	72.7862	0.7849	22.4603
2011-09-16 22:31:37	22:31:37.978000	155.738	72.792	0.7489	22.5063
2011-09-16 22:39:38	22:39:38.016000	155.659	72.798	0.7476	22.5287
2011-09-16 22:47:37	22:47:37.968000	155.579	72.8047	0.7717	22.5556
2011-09-16 22:55:38	22:55:38.006000	155.499	72.8115	0.9289	22.5544
2011-09-16 23:03:37	23:03:37.958000	155.417	72.8179	1.2648	22.6171
2011-09-16 23:11:37	23:11:37.997000	155.334	72.8241	1.2919	23.168
2011-09-16 23:19:38	23:19:38.035000	155.251	72.8311	1.3598	23.2092
2011-09-16 23:27:37	23:27:37.987000	155.168	72.8383	1.4578	23.3929
2011-09-16 23:35:38	23:35:38.026000	155.086	72.8443	1.3139	23.6507
2011-09-16 23:43:37	23:43:37.978000	155.004	72.8505	0.9726	23.3118
2011-09-16 23:51:38	23:51:38.016000	154.922	72.8572	0.6932	22.0107
2011-09-16 23:59:37	23:59:37.968000	154.841	72.8638	0.6491	20.9905
2011-09-17 00:07:38	00:07:38.006000	154.76	72.8707	0.598	20.6055
2011-09-17 00:15:37	00:15:37.958000	154.679	72.8776	0.7366	20.4981
2011-09-17 00:23:37	00:23:37.997000	154.598	72.884	0.7298	20.6595
2011-09-17 00:31:38	00:31:38.035000	154.515	72.8904	0.6459	20.767
2011-09-17 00:39:37	00:39:37.987000	154.433	72.8972	0.6507	20.7615
2011-09-17 00:47:38	00:47:38.026000	154.35	72.9039	0.6214	20.7369
2011-09-17 00:55:37	00:55:37.978000	154.267	72.9106	0.6782	20.7703
2011-09-17 01:03:38	01:03:38.016000	154.184	72.917	0.6795	20.7998
2011-09-17 01:11:37	01:11:37.968000	154.1	72.9234	0.6521	20.7193
2011-09-17 01:19:38	01:19:38.006000	154.017	72.9306	0.6113	20.5633
2011-09-17 01:27:37	01:27:37.958000	153.934	72.9372	0.5509	20.441
2011-09-17 01:35:37	01:35:37.997000	153.85	72.9441	0.5448	20.3931
2011-09-17 01:43:38	01:43:38.035000	153.767	72.9508	0.5762	20.3435
2011-09-17 01:51:37	01:51:37.987000	153.686	72.9571	0.6287	20.531
2011-09-17 01:59:38	01:59:38.026000	153.635	72.9613	0.6422	20.6416
2011-09-17 02:07:37	02:07:37.978000	153.579	72.9657	0.5704	20.7427
2011-09-17 02:15:38	02:15:38.016000	153.566	72.9665	0.5805	20.5885
2011-09-17 02:23:37	02:23:37.968000	153.561	72.9658	0.5756	20.398
2011-09-17 02:31:38	02:31:38.006000	153.557	72.9651	0.5659	20.3196
2011-09-17 02:39:37	02:39:37.958000	153.552	72.9644	0.5567	20.2984
2011-09-17 02:47:37	02:47:37.997000	153.547	72.9637	0.556	20.3115
2011-09-17 02:55:38	02:55:38.035000	153.528	72.9686	0.5428	20.3426
2011-09-17 03:03:37	03:03:37.987000	153.47	72.9844	0.5741	20.3401
2011-09-17 03:11:38	03:11:38.026000	153.396	72.9985	0.8322	20.2727
2011-09-17 03:19:37	03:19:37.978000	153.32	73.0128	0.8448	20.671
2011-09-17 03:27:38	03:27:38.016000	153.245	73.0268	0.7148	20.827
2011-09-17 03:35:37	03:35:37.968000	153.169	73.0404	0.6605	20.848
2011-09-17 03:43:38	03:43:38.006000	153.094	73.0543	0.6554	20.8857
2011-09-17 03:51:37	03:51:37.958000	153.019	73.0681	0.623	20.8286
2011-09-17 03:59:37	03:59:37.997000	152.944	73.0819	0.5305	20.768
2011-09-17 04:07:38	04:07:38.035000	152.869	73.0957	0.5252	20.7392
2011-09-17 04:15:37	04:15:37.987000	152.794	73.1095	0.5948	20.781
2011-09-17 04:23:38	04:23:38.026000	152.719	73.1233	0.7381	20.9226
2011-09-17 04:31:37	04:31:37.978000	152.644	73.1371	0.6582	21.0385
2011-09-17 04:39:38	04:39:38.016000	152.569	73.1513	0.5656	21.177
2011-09-17 04:47:37	04:47:37.968000	152.492	73.1653	0.5975	21.1135
2011-09-17 04:55:38	04:55:38.006000	152.414	73.1792	0.5819	21.1221
2011-09-17 05:03:37	05:03:37.958000	152.337	73.1936	0.7606	21.1314
2011-09-17 05:11:37	05:11:37.997000	152.261	73.2082	0.9238	21.1127
2011-09-17 05:19:38	05:19:38.035000	152.185	73.2229	0.8407	21.2636
2011-09-17 05:27:37	05:27:37.987000	152.107	73.2367	0.8345	21.403
2011-09-17 05:35:38	05:35:38.026000	152.028	73.2504	0.8073	21.394
2011-09-17 05:43:37	05:43:37.978000	151.949	73.2643	0.9979	21.4366
2011-09-17 05:51:38	05:51:38.016000	151.875	73.2769	1.365	21.8506
2011-09-17 05:59:37	05:59:37.968000	151.801	73.2899	1.2847	22.5392
2011-09-17 06:07:38	06:07:38.006000	151.727	73.3039	0.8807	22.6205
2011-09-17 06:15:37	06:15:37.958000	151.652	73.3183	0.7236	22.1867
2011-09-17 06:23:37	06:23:37.997000	151.578	73.3324	0.6808	21.878
2011-09-17 06:31:38	06:31:38.035000	151.502	73.3467	0.6243	21.7562
2011-09-17 06:39:37	06:39:37.987000	151.426	73.3607	0.9625	21.5799
2011-09-17 06:47:38	06:47:38.026000	151.351	73.3742	1.1745	21.9665
2011-09-17 06:55:37	06:55:37.978000	151.276	73.3873	1.3129	22.413
2011-09-17 07:03:38	07:03:38.016000	151.203	73.4004	1.4327	22.6611
2011-09-17 07:11:37	07:11:37.968000	151.128	73.4138	1.4083	22.7532
2011-09-17 07:19:38	07:19:38.006000	151.053	73.4275	1.3617	22.731
2011-09-17 07:27:37	07:27:37.958000	150.98	73.4407	1.5396	22.636
2011-09-17 07:35:37	07:35:37.997000	150.907	73.454	1.5094	22.7156
2011-09-17 07:43:38	07:43:38.035000	150.834	73.4674	1.4664	22.8354
2011-09-17 07:51:37	07:51:37.987000	150.76	73.481	1.4554	22.7974
2011-09-17 07:59:38	07:59:38.026000	150.687	73.4946	1.623	22.6306
2011-09-17 08:07:37	08:07:37.978000	150.614	73.5075	1.7272	22.6358
2011-09-17 08:15:38	08:15:38.016000	150.541	73.5205	1.7657	22.6197
2011-09-17 08:23:37	08:23:37.968000	150.467	73.5331	1.7838	22.6213
2011-09-17 08:31:38	08:31:38.006000	150.394	73.5461	1.7604	22.6062
2011-09-17 08:39:37	08:39:37.958000	150.32	73.5592	1.766	22.5379
2011-09-17 08:47:37	08:47:37.997000	150.248	73.5721	1.7767	22.5284
2011-09-17 08:55:38	08:55:38.035000	150.176	73.5852	1.7133	22.5286
2011-09-17 09:03:37	09:03:37.987000	150.104	73.5983	1.6209	22.4164
2011-09-17 09:11:38	09:11:38.026000	150.032	73.6114	1.5267	22.3221
2011-09-17 09:19:37	09:19:37.978000	149.961	73.6243	1.4652	22.2481
2011-09-17 09:27:38	09:27:38.016000	149.889	73.6369	1.4434	22.1921
2011-09-17 09:35:37	09:35:37.968000	149.817	73.6496	1.4209	22.1692
2011-09-17 09:43:38	09:43:38.006000	149.748	73.6618	1.4327	22.1582
2011-09-17 09:51:37	09:51:37.958000	149.694	73.6715	1.4828	22.1676
2011-09-17 09:59:37	09:59:37.997000	149.631	73.6826	1.4624	22.1868
2011-09-17 10:07:38	10:07:38.035000	149.598	73.6897	1.4292	22.2085
2011-09-17 10:15:37	10:15:37.987000	149.593	73.6889	1.432	22.2557
2011-09-17 10:23:38	10:23:38.026000	149.591	73.6876	1.4345	22.2848
2011-09-17 10:31:37	10:31:37.978000	149.587	73.6864	1.4321	22.2937
2011-09-17 10:39:38	10:39:38.016000	149.554	73.6973	1.4312	22.3067
2011-09-17 10:47:37	10:47:37.968000	149.483	73.711	1.4967	22.2913
2011-09-17 10:55:38	10:55:38.006000	149.408	73.7223	1.517	22.3553
2011-09-17 11:03:37	11:03:37.958000	149.331	73.7333	1.5284	22.3851
2011-09-17 11:11:37	11:11:37.997000	149.256	73.7449	1.5226	22.4
2011-09-17 11:19:38	11:19:38.035000	149.18	73.7563	1.5187	22.4023
2011-09-17 11:27:37	11:27:37.987000	149.105	73.7677	1.5131	22.4019
2011-09-17 11:35:38	11:35:38.026000	149.03	73.7791	1.4953	22.3893
2011-09-17 11:43:37	11:43:37.978000	148.954	73.7904	1.4892	22.3567
2011-09-17 11:51:38	11:51:38.016000	148.879	73.8019	1.4074	22.3299
2011-09-17 11:59:37	11:59:37.968000	148.804	73.8133	1.304	22.3147
2011-09-17 12:07:38	12:07:38.006000	148.729	73.8245	1.2631	22.2662
2011-09-17 12:15:37	12:15:37.958000	148.654	73.8359	1.2514	21.8076
2011-09-17 12:23:37	12:23:37.997000	148.579	73.847	1.2587	21.6041
2011-09-17 12:31:38	12:31:38.035000	148.504	73.8582	1.2374	21.5641
2011-09-17 12:39:37	12:39:37.987000	148.428	73.8695	1.2259	21.5961
2011-09-17 12:47:38	12:47:38.026000	148.353	73.8807	1.1832	21.5892
2011-09-17 12:55:37	12:55:37.978000	148.277	73.8921	1.1133	21.8468
2011-09-17 13:03:38	13:03:38.016000	148.202	73.9034	1.1144	21.8921
2011-09-17 13:11:37	13:11:37.968000	148.127	73.9147	1.1263	21.9754
2011-09-17 13:19:38	13:19:38.006000	148.051	73.9261	1.186	21.9027
2011-09-17 13:27:37	13:27:37.958000	147.975	73.9373	1.2256	21.5723
2011-09-17 13:35:37	13:35:37.997000	147.899	73.9488	1.1968	21.2426
2011-09-17 13:43:38	13:43:38.035000	147.822	73.9601	1.1479	21.2137
2011-09-17 13:51:37	13:51:37.987000	147.745	73.9715	1.1976	21.2638
2011-09-17 13:59:38	13:59:38.026000	147.668	73.9831	1.2632	20.9243
2011-09-17 14:07:37	14:07:37.978000	147.591	73.9947	1.2827	20.4992
2011-09-17 14:15:38	14:15:38.016000	147.514	74.0061	1.2886	20.279
2011-09-17 14:23:37	14:23:37.968000	147.437	74.0174	1.2679	20.2741
2011-09-17 14:31:38	14:31:38.006000	147.359	74.0288	1.2941	20.2638
2011-09-17 14:39:37	14:39:37.958000	147.281	74.0407	1.3427	19.9279
2011-09-17 14:47:37	14:47:37.997000	147.203	74.0523	1.3513	19.4375
2011-09-17 14:55:38	14:55:38.035000	147.124	74.064	1.3562	19.2894
2011-09-17 15:03:37	15:03:37.987000	147.046	74.0757	1.3197	19.2612
2011-09-17 15:11:38	15:11:38.026000	146.967	74.0874	1.2955	19.2813
2011-09-17 15:19:37	15:19:37.978000	146.888	74.0992	1.2917	19.4231
2011-09-17 15:27:38	15:27:38.016000	146.808	74.1107	1.3217	19.545
2011-09-17 15:35:37	15:35:37.968000	146.73	74.1223	1.3107	19.5102
2011-09-17 15:43:38	15:43:38.006000	146.65	74.1341	1.3075	19.516
2011-09-17 15:51:37	15:51:37.958000	146.57	74.1461	1.357	19.5571
2011-09-17 15:59:37	15:59:37.997000	146.49	74.1576	1.3903	19.4524
2011-09-17 16:07:38	16:07:38.035000	146.411	74.1693	1.4412	19.2582
2011-09-17 16:15:37	16:15:37.987000	146.332	74.1813	1.4434	19.0017
2011-09-17 16:23:38	16:23:38.026000	146.251	74.1932	1.4729	18.9761
2011-09-17 16:31:37	16:31:37.978000	146.17	74.2048	1.4898	19.0328
2011-09-17 16:39:38	16:39:38.016000	146.089	74.2166	1.4879	19.1158
2011-09-17 16:47:37	16:47:37.968000	146.008	74.2286	1.5228	19.1617
2011-09-17 16:55:38	16:55:38.006000	145.926	74.2407	1.603	19.2036
2011-09-17 17:03:37	17:03:37.958000	145.844	74.2527	1.7164	19.1354
2011-09-17 17:11:37	17:11:37.997000	145.762	74.2647	1.7316	19.2767
2011-09-17 17:19:38	17:19:38.035000	145.68	74.2767	1.7347	19.3596
2011-09-17 17:27:37	17:27:37.987000	145.598	74.2887	1.7197	19.4738
2011-09-17 17:35:38	17:35:38.026000	145.516	74.3008	1.6845	19.5301
2011-09-17 17:43:37	17:43:37.978000	145.435	74.3129	1.7245	19.5477
2011-09-17 17:51:38	17:51:38.016000	145.352	74.3248	1.8112	19.5831
2011-09-17 17:59:37	17:59:37.968000	145.27	74.3367	1.9443	19.5296
2011-09-17 18:07:38	18:07:38.006000	145.188	74.3486	2.0941	19.764
2011-09-17 18:15:37	18:15:37.958000	145.106	74.3604	2.2415	19.9085
2011-09-17 18:23:37	18:23:37.997000	145.025	74.372	2.0379	20.0411
2011-09-17 18:31:38	18:31:38.035000	144.963	74.3813	1.8585	19.7766
2011-09-17 18:39:37	18:39:37.987000	144.893	74.3915	1.8062	19.4012
2011-09-17 18:47:38	18:47:38.026000	144.833	74.3998	1.8344	19.3222
2011-09-17 18:55:37	18:55:37.978000	144.826	74.3999	1.8577	19.3304
2011-09-17 19:03:38	19:03:38.016000	144.821	74.4008	1.8704	19.3783
2011-09-17 19:11:37	19:11:37.968000	144.815	74.4035	1.8818	19.4293
2011-09-17 19:19:38	19:19:38.006000	144.81	74.4061	1.8983	19.481
2011-09-17 19:27:37	19:27:37.958000	144.805	74.4087	1.8893	19.5025
2011-09-17 19:35:37	19:35:37.997000	144.796	74.4106	1.871	19.4689
2011-09-17 19:43:38	19:43:38.035000	144.723	74.4081	1.8832	19.4138
2011-09-17 19:51:37	19:51:37.987000	144.631	74.4062	1.8919	19.3956
2011-09-17 19:59:38	19:59:38.026000	144.539	74.408	1.8104	19.3077
2011-09-17 20:07:37	20:07:37.978000	144.445	74.4104	1.8926	18.9927
2011-09-17 20:15:38	20:15:38.016000	144.353	74.4128	1.8824	18.7506
2011-09-17 20:23:37	20:23:37.968000	144.259	74.4151	1.8919	18.7419
2011-09-17 20:31:38	20:31:38.006000	144.167	74.4177	2.0087	18.6481
2011-09-17 20:39:37	20:39:37.958000	144.074	74.4204	2.0162	18.5263
2011-09-17 20:47:37	20:47:37.997000	143.989	74.4224	1.9702	18.4786
2011-09-17 20:55:38	20:55:38.035000	143.913	74.4243	1.97	18.5148
2011-09-17 21:03:37	21:03:37.987000	143.851	74.4259	2.0521	18.5336
2011-09-17 21:11:38	21:11:38.026000	143.772	74.4278	2.1564	18.3655
2011-09-17 21:19:37	21:19:37.978000	143.685	74.4314	2.2185	18.215
2011-09-17 21:27:38	21:27:38.016000	143.599	74.4357	2.2512	18.1182
2011-09-17 21:35:37	21:35:37.968000	143.512	74.44	2.3018	18.0689
2011-09-17 21:43:38	21:43:38.006000	143.426	74.4446	2.3194	18.0254
2011-09-17 21:51:37	21:51:37.958000	143.338	74.4489	2.2978	18.0295
2011-09-17 21:59:37	21:59:37.997000	143.251	74.4531	2.2439	17.9329
2011-09-17 22:07:38	22:07:38.035000	143.164	74.4574	2.2	17.8841
2011-09-17 22:15:37	22:15:37.987000	143.077	74.4618	2.176	17.8775
2011-09-17 22:23:38	22:23:38.026000	142.988	74.4662	2.1626	17.8595
2011-09-17 22:31:37	22:31:37.978000	142.9	74.4708	2.1616	17.8759
2011-09-17 22:39:38	22:39:38.016000	142.812	74.4752	2.1558	17.9405
2011-09-17 22:47:37	22:47:37.968000	142.724	74.4796	2.1917	17.9771
2011-09-17 22:55:38	22:55:38.006000	142.636	74.4838	2.1606	17.9375
2011-09-17 23:03:37	23:03:37.958000	142.548	74.4883	2.1498	17.9968
2011-09-17 23:11:37	23:11:37.997000	142.461	74.4928	2.1061	18.0743
2011-09-17 23:19:38	23:19:38.035000	142.371	74.497	2.142	18.2345
2011-09-17 23:27:37	23:27:37.987000	142.282	74.5014	2.1788	18.3491
2011-09-17 23:35:38	23:35:38.026000	142.193	74.5058	2.1343	18.4175
2011-09-17 23:43:37	23:43:37.978000	142.104	74.5103	2.0779	18.2755
2011-09-17 23:51:38	23:51:38.016000	142.014	74.5148	2.0486	18.0844
2011-09-17 23:59:37	23:59:37.968000	141.924	74.5192	2.0914	17.9055
2011-09-18 00:07:38	00:07:38.006000	141.835	74.5237	2.0842	17.6936
2011-09-18 00:15:37	00:15:37.958000	141.746	74.5282	2.0811	17.6404
2011-09-18 00:23:37	00:23:37.997000	141.656	74.5325	2.0519	17.6755
2011-09-18 00:31:38	00:31:38.035000	141.566	74.5368	2.049	17.6934
2011-09-18 00:39:37	00:39:37.987000	141.476	74.5414	2.0468	17.676
2011-09-18 00:51:42	00:51:16.019000	141.41	74.5411	2.0308	17.8778
2011-09-18 00:59:41	00:58:31.019000	141.399	74.5413	2.0436	17.8584
2011-09-18 01:07:42	01:05:47.019000	141.388	74.5425	2.0463	17.8558
2011-09-18 01:15:41	01:13:02.019000	141.377	74.5441	2.0395	17.8667
2011-09-18 01:23:42	01:20:17.019000	141.367	74.5459	2.0349	17.8913
2011-09-18 01:31:42	01:27:32.019000	141.358	74.5478	2.03	17.9203
2011-09-18 01:39:41	01:34:47.019000	141.349	74.5498	2.0375	17.9603
2011-09-18 01:47:42	01:42:03.019000	141.34	74.5518	2.0331	17.9993
2011-09-18 01:55:41	01:49:18.019000	141.332	74.5538	2.0294	18.0363
2011-09-18 02:03:42	01:56:33.019000	141.324	74.5557	2.03	18.0852
2011-09-18 02:11:41	02:03:48.019000	141.297	74.5563	2.0458	18.0997
2011-09-18 02:19:42	02:11:04.019000	141.231	74.5558	2.0369	18.1138
2011-09-18 02:27:41	02:18:19.019000	141.147	74.5579	2.0345	18.0631
2011-09-18 02:35:42	02:25:34.019000	141.062	74.562	2.0211	17.981
2011-09-18 02:43:42	02:32:49.019000	140.979	74.5624	2.0066	17.9811
2011-09-18 02:51:41	02:40:04.019000	140.897	74.5548	1.9983	18.078
2011-09-18 02:59:42	02:47:20.019000	140.816	74.5466	1.98	18.2149
2011-09-18 03:07:41	02:54:35.019000	140.735	74.5381	1.9987	18.1923
2011-09-18 03:15:42	03:01:50.019000	140.653	74.5301	2.0812	18.1277
2011-09-18 03:23:41	03:09:05.019000	140.573	74.5221	2.0175	17.7644
2011-09-18 03:31:42	03:16:20.019000	140.495	74.514	2.0656	17.6754
2011-09-18 03:39:41	03:23:36.019000	140.417	74.506	2.1462	17.4507
2011-09-18 03:47:42	03:30:51.019000	140.338	74.4982	2.1816	17.2348
2011-09-18 03:55:42	03:38:06.019000	140.258	74.4902	2.2037	17.1558
2011-09-18 04:03:41	03:45:21.019000	140.179	74.4823	2.2012	17.1369
2011-09-18 04:11:42	03:52:36.019000	140.1	74.4742	2.1804	17.1477
2011-09-18 04:19:41	03:59:52.019000	140.021	74.4661	2.2493	17.0693
2011-09-18 04:27:42	04:07:07.019000	139.942	74.4582	2.2817	16.9722
2011-09-18 04:35:41	04:14:22.019000	139.864	74.4502	2.2923	16.9855
2011-09-18 04:43:42	04:21:37.019000	139.786	74.4426	2.29	17.0233
2011-09-18 04:51:41	04:28:53.019000	139.709	74.4348	2.2948	17.042
2011-09-18 04:59:42	04:36:08.019000	139.631	74.4268	2.2745	17.085
2011-09-18 05:07:42	04:43:23.019000	139.552	74.4188	2.2365	17.1841
2011-09-18 05:15:41	04:50:38.019000	139.477	74.4112	2.1669	17.5624
2011-09-18 05:23:42	04:57:53.019000	139.421	74.4054	2.1851	17.6405
2011-09-18 05:31:41	05:05:09.019000	139.371	74.4002	2.1592	17.6916
2011-09-18 05:39:42	05:12:24.019000	139.362	74.4017	2.1381	17.693
2011-09-18 05:47:41	05:19:39.019000	139.352	74.4023	2.1204	17.7787
2011-09-18 05:55:42	05:26:54.019000	139.344	74.4019	2.1191	17.8335
2011-09-18 06:03:41	05:34:09.019000	139.34	74.4019	2.1373	17.8833
2011-09-18 06:11:42	05:41:25.019000	139.308	74.4048	2.169	18.045
2011-09-18 06:19:42	05:48:40.019000	139.233	74.4116	2.1378	18.1407
2011-09-18 06:27:41	05:55:55.019000	139.156	74.4179	2.2618	18.0641
2011-09-18 06:35:42	06:03:10.019000	139.08	74.4242	2.5001	17.7142
2011-09-18 06:43:41	06:10:26.019000	139.004	74.4303	2.5894	17.0953
2011-09-18 06:51:42	06:17:41.019000	138.929	74.4366	2.5385	16.9122
2011-09-18 06:59:41	06:24:56.019000	138.853	74.443	2.5061	16.9078
2011-09-18 07:07:42	06:32:11.019000	138.778	74.4494	2.5381	16.9525
2011-09-18 07:15:41	06:39:26.019000	138.701	74.4559	2.5996	16.9044
2011-09-18 07:23:42	06:46:42.019000	138.626	74.4622	2.7498	16.791
2011-09-18 07:31:42	06:53:57.019000	138.55	74.4687	2.9589	16.571
2011-09-18 07:39:41	07:01:12.019000	138.475	74.475	3.0255	16.47
2011-09-18 07:47:42	07:08:27.019000	138.4	74.4813	3.1151	16.4405
2011-09-18 07:55:41	07:15:42.019000	138.324	74.4875	3.14	16.4651
2011-09-18 08:03:42	07:22:58.019000	138.25	74.4936	3.1741	16.4614
2011-09-18 08:11:41	07:30:13.019000	138.175	74.4997	3.111	16.5179
2011-09-18 08:19:42	07:37:28.019000	138.115	74.5132	3.0553	16.5509
2011-09-18 08:27:41	07:44:43.019000	138.057	74.5279	2.9649	16.5666
2011-09-18 08:35:42	07:51:58.019000	137.998	74.5423	2.9866	16.5864
2011-09-18 08:43:42	07:59:14.019000	137.94	74.5568	3.0642	16.5608
2011-09-18 08:51:41	08:06:29.019000	137.88	74.5711	3.0611	16.5571
2011-09-18 08:59:42	08:13:44.019000	137.821	74.5855	3.0588	16.5443
2011-09-18 09:07:41	08:20:59.019000	137.763	74.5999	3.0448	16.5412
2011-09-18 09:15:42	08:28:15.019000	137.704	74.6143	3.0524	16.5435
2011-09-18 09:23:41	08:35:30.019000	137.645	74.6287	3.0899	16.5254
2011-09-18 09:31:42	08:42:45.019000	137.586	74.643	3.0789	16.519
2011-09-18 09:39:41	08:50:00.019000	137.527	74.6571	3.0097	16.5141
2011-09-18 09:47:42	08:57:15.019000	137.468	74.6711	2.9037	16.5443
2011-09-18 09:55:42	09:04:31.019000	137.41	74.6852	2.8489	16.527
2011-09-18 10:03:41	09:11:46.019000	137.352	74.6997	2.8739	16.5102
2011-09-18 10:11:42	09:19:01.019000	137.294	74.714	2.8592	16.5959
2011-09-18 10:19:41	09:26:16.019000	137.236	74.7282	2.8047	16.6221
2011-09-18 10:27:42	09:33:32.019000	137.177	74.7423	2.7015	16.6181
2011-09-18 10:35:41	09:40:47.019000	137.118	74.7567	2.7631	16.895
2011-09-18 10:43:42	09:48:02.019000	137.058	74.7708	2.8376	17.1921
2011-09-18 10:51:41	09:55:17.019000	136.998	74.7853	2.7604	17.269
2011-09-18 10:59:42	10:02:32.019000	136.94	74.7997	2.7663	17.2512
2011-09-18 11:07:42	10:09:48.019000	136.881	74.8139	3.0393	17.2205
2011-09-18 11:15:41	10:17:03.019000	136.822	74.8278	3.0782	17.0088
2011-09-18 11:23:42	10:24:18.019000	136.764	74.842	3.333	16.9686
2011-09-18 11:31:41	10:31:33.019000	136.705	74.8566	3.5274	16.5546
2011-09-18 11:39:42	10:38:48.019000	136.646	74.8708	3.574	16.3805
2011-09-18 11:47:41	10:46:04.019000	136.587	74.885	3.5997	16.2651
2011-09-18 11:55:42	10:53:19.019000	136.527	74.8993	3.6432	16.1291
2011-09-18 12:03:41	11:00:34.019000	136.467	74.9137	3.6892	16.0302
2011-09-18 12:11:42	11:07:49.019000	136.407	74.928	3.6989	15.964
2011-09-18 12:19:42	11:15:05.019000	136.347	74.9423	3.6195	15.953
2011-09-18 12:27:41	11:22:20.019000	136.288	74.9564	3.6071	15.9539
2011-09-18 12:35:42	11:29:35.019000	136.229	74.9709	3.6642	16.0107
2011-09-18 12:43:41	11:36:50.019000	136.169	74.9852	3.6913	15.9335
2011-09-18 12:51:42	11:44:05.019000	136.109	74.9994	3.6826	15.846
2011-09-18 12:59:41	11:51:21.019000	136.05	75.0133	3.6853	15.8038
2011-09-18 13:07:42	11:58:36.019000	135.991	75.0274	3.7959	15.7569
2011-09-18 13:15:41	12:05:51.019000	135.933	75.0418	3.8728	15.6663
2011-09-18 13:23:42	12:13:06.019000	135.872	75.0561	3.8816	15.6113
2011-09-18 13:31:42	12:20:21.019000	135.812	75.0702	3.9048	15.5966
2011-09-18 13:39:41	12:27:37.019000	135.752	75.0844	3.7993	15.6246
2011-09-18 13:47:42	12:34:52.019000	135.693	75.0985	3.8771	15.592
2011-09-18 13:55:41	12:42:07.019000	135.633	75.1125	3.8287	15.6799
2011-09-18 14:03:42	12:49:22.019000	135.574	75.1267	3.8783	15.6929
2011-09-18 14:11:41	12:56:38.019000	135.514	75.141	3.8938	15.7109
2011-09-18 14:19:42	13:03:53.019000	135.453	75.1554	3.8942	15.7005
2011-09-18 14:27:41	13:11:08.019000	135.393	75.1698	3.7221	15.7164
2011-09-18 14:35:42	13:18:23.019000	135.333	75.1837	3.7145	15.7693
2011-09-18 14:43:42	13:25:38.019000	135.273	75.1977	3.7627	15.7883
2011-09-18 14:51:41	13:32:54.019000	135.214	75.212	3.9086	15.7188
2011-09-18 14:59:42	13:40:09.019000	135.153	75.2262	3.9045	15.5757
2011-09-18 15:07:41	13:47:24.019000	135.092	75.2402	3.9004	15.514
2011-09-18 15:15:42	13:54:39.019000	135.032	75.2543	3.9395	15.5027
2011-09-18 15:23:41	14:01:54.019000	134.971	75.2685	3.9696	15.5383
2011-09-18 15:31:42	14:09:10.019000	134.912	75.2828	3.9608	15.5732
2011-09-18 15:39:41	14:16:25.019000	134.851	75.2969	3.956	15.5108
2011-09-18 15:47:42	14:23:40.019000	134.791	75.311	3.9575	15.4919
2011-09-18 15:55:42	14:30:55.019000	134.73	75.325	3.9674	15.4725
2011-09-18 16:03:41	14:38:10.019000	134.67	75.3392	3.9765	15.4446
2011-09-18 16:11:42	14:45:26.019000	134.61	75.3534	3.9636	15.4475
2011-09-18 16:19:41	14:52:41.019000	134.55	75.3672	3.9515	15.4785
2011-09-18 16:27:42	14:59:56.019000	134.491	75.3811	3.9314	15.5127
2011-09-18 16:35:41	15:07:11.019000	134.433	75.3948	3.9215	15.5159
2011-09-18 16:43:42	15:14:26.019000	134.374	75.4085	3.8706	15.497
2011-09-18 16:51:41	15:21:42.019000	134.326	75.4194	3.8616	15.5324
2011-09-18 16:59:42	15:28:57.019000	134.281	75.4301	3.8978	15.5673
2011-09-18 17:07:42	15:36:12.019000	134.262	75.4329	3.9083	15.6464
2011-09-18 17:15:41	15:43:27.019000	134.264	75.4329	3.9196	15.6401
2011-09-18 17:23:42	15:50:42.019000	134.263	75.4338	3.9226	15.6567
2011-09-18 17:31:41	15:57:58.019000	134.26	75.4346	3.9189	15.6723
2011-09-18 17:39:42	16:05:13.019000	134.261	75.4388	3.9228	15.6938
2011-09-18 17:47:41	16:12:28.019000	134.225	75.454	3.9223	15.704
2011-09-18 17:55:42	16:19:43.019000	134.188	75.4723	3.9141	15.7184
2011-09-18 18:03:41	16:26:58.019000	134.151	75.4907	3.9002	15.757
2011-09-18 18:11:42	16:34:14.019000	134.113	75.509	3.8382	15.7653
2011-09-18 18:19:42	16:41:29.019000	134.076	75.5273	3.8889	16.0287
2011-09-18 18:27:41	16:48:44.019000	134.038	75.5458	3.9327	16.0334
2011-09-18 18:35:42	16:55:59.019000	134	75.5639	3.8119	16.0661
2011-09-18 18:43:41	17:03:14.019000	133.963	75.5823	3.7773	16.3584
2011-09-18 18:51:42	17:10:30.019000	133.925	75.6005	3.752	16.35
2011-09-18 18:59:41	17:17:45.019000	133.886	75.6186	3.8803	16.3513
2011-09-18 19:07:42	17:25:00.019000	133.849	75.6366	3.8917	16.2508
2011-09-18 19:15:41	17:32:15.019000	133.813	75.6546	3.8848	16.1911
2011-09-18 19:23:42	17:39:30.019000	133.777	75.6723	3.9213	16.156
2011-09-18 19:31:42	17:46:46.019000	133.742	75.6898	3.8963	16.134
2011-09-18 19:39:41	17:54:01.019000	133.708	75.7072	3.8651	16.0879
2011-09-18 19:47:42	18:01:16.019000	133.673	75.7248	3.8592	16.0716
2011-09-18 19:55:41	18:08:31.019000	133.639	75.7422	3.854	16.089
2011-09-18 20:03:42	18:15:46.019000	133.603	75.7594	3.824	16.1138
2011-09-18 20:11:41	18:23:02.019000	133.567	75.7763	3.7842	16.1571
2011-09-18 20:19:42	18:30:17.019000	133.529	75.7932	3.828	16.1162
2011-09-18 20:27:41	18:37:32.019000	133.492	75.8106	3.9184	16.1127
2011-09-18 20:35:42	18:44:47.019000	133.455	75.8279	3.8888	16.3235
2011-09-18 20:43:42	18:52:03.019000	133.418	75.8449	3.8739	16.5539
2011-09-18 20:51:41	18:59:18.019000	133.381	75.8621	3.9272	16.5967
2011-09-18 20:59:42	19:06:33.019000	133.346	75.8796	3.9726	16.6222
2011-09-18 21:07:41	19:13:48.019000	133.311	75.8972	3.9839	16.6005
2011-09-18 21:15:42	19:21:03.019000	133.275	75.915	3.8954	16.5903
2011-09-18 21:23:41	19:28:19.019000	133.236	75.9322	3.8099	16.6795
2011-09-18 21:31:42	19:35:34.019000	133.198	75.9493	3.8567	16.8656
2011-09-18 21:39:41	19:42:49.019000	133.163	75.9665	3.8769	16.7823
2011-09-18 21:47:42	19:50:04.019000	133.129	75.9843	3.912	16.6677
2011-09-18 21:55:42	19:57:19.019000	133.096	76.0022	3.8939	16.6237
2011-09-18 22:03:41	20:04:35.019000	133.059	76.02	3.9486	16.6303
2011-09-18 22:11:42	20:11:50.019000	133.02	76.0374	3.9768	16.6431
2011-09-18 22:19:41	20:19:05.019000	132.982	76.0548	3.9995	16.641
2011-09-18 22:27:42	20:26:20.019000	132.944	76.0725	4.016	16.64
2011-09-18 22:35:41	20:33:35.019000	132.907	76.0902	4.0461	16.6238
2011-09-18 22:43:42	20:40:51.019000	132.871	76.1081	3.9866	16.6538
2011-09-18 22:51:41	20:48:06.019000	132.833	76.1257	3.9186	16.6619
2011-09-18 22:59:42	20:55:21.019000	132.793	76.1432	3.8969	16.7228
2011-09-18 23:07:42	21:02:36.019000	132.76	76.1615	3.913	16.8073
2011-09-18 23:15:41	21:09:51.019000	132.773	76.1815	3.9575	16.8297
2011-09-18 23:23:42	21:17:07.019000	132.748	76.1969	3.9738	16.872
2011-09-18	21:24:22.019000	132.69	76.2116	4.0173	16.8898
2011-09-18	21:31:37.019000	132.632	76.2257	4.0127	17.2253
2011-09-18	21:38:52.019000	132.584	76.2418	4.0827	17.951
2011-09-18	21:46:07.019000	132.545	76.2595	4.055	18.142
2011-09-18	21:53:23.019000	132.507	76.2771	4.0105	18.2031
2011-09-18	22:00:38.019000	132.469	76.2948	4.0135	18.2236
2011-09-18	22:07:53.019000	132.431	76.312	4.0327	18.2707
2011-09-18	22:15:08.019000	132.399	76.3263	4.0158	18.2502
2011-09-18	22:22:23.019000	132.369	76.3412	4.0073	18.2568
2011-09-18	22:29:39.019000	132.346	76.3497	3.9871	18.2769
2011-09-18	22:36:54.019000	132.343	76.35	3.9877	18.3141
2011-09-18	22:44:09.019000	132.341	76.3518	3.9827	18.3121
2011-09-18	22:51:24.019000	132.339	76.3533	3.9774	18.3472
2011-09-18	22:58:39.019000	132.337	76.3548	3.9785	18.359
2011-09-18	23:05:55.019000	132.34	76.3564	3.9848	18.4254
2011-09-18	23:13:10.019000	132.309	76.3608	4.0013	18.4927
2011-09-18	23:20:25.019000	132.262	76.3633	4.0251	18.5119
2011-09-18	23:27:40.019000	132.217	76.3667	4.0429	18.4968
2011-09-18	23:34:56.019000	132.173	76.3702	4.0449	18.4619
2011-09-18	23:42:11.019000	132.13	76.3739	4.0535	18.4544
2011-09-18	23:49:26.019000	132.086	76.3782	4.0261	18.49
2011-09-18	23:56:41.019000	132.041	76.3825	4.0455	18.5198
2011-09-19 02:27:41	1900-01-01 00:03:56	131.997	76.3867	4.0349	18.5432
2011-09-19 02:35:42	1900-01-01 00:11:12	131.955	76.3906	3.9383	18.6035
2011-09-19 02:43:42	1900-01-01 00:18:27	131.912	76.394	3.9128	18.3658
2011-09-19 02:51:41	1900-01-01 00:25:42	131.935	76.3873	3.9321	18.591
2011-09-19 02:59:42	1900-01-01 00:32:57	131.983	76.3829	3.9463	18.658
2011-09-19 03:07:41	1900-01-01 00:40:12	131.999	76.3874	3.9578	18.6668
2011-09-19 03:15:42	1900-01-01 00:47:28	131.96	76.3907	3.912	18.6902
2011-09-19 03:23:41	1900-01-01 00:54:43	131.918	76.3942	3.9037	18.71
2011-09-19 03:31:42	1900-01-01 01:01:58	131.875	76.3975	3.9365	18.7352
2011-09-19 03:39:41	1900-01-01 01:09:13	131.83	76.4013	3.9797	18.7224
2011-09-19 03:47:42	1900-01-01 01:16:28	131.784	76.4055	4.0018	18.7303
2011-09-19 03:55:42	1900-01-01 01:23:44	131.74	76.4095	4.0384	18.7835
2011-09-19 04:03:41	1900-01-01 01:30:59	131.698	76.4135	3.9347	18.8393
2011-09-19 04:11:42	1900-01-01 01:38:14	131.652	76.4176	3.9094	18.7561
2011-09-19 04:19:41	1900-01-01 01:45:29	131.607	76.4216	3.9329	18.6135
2011-09-19 04:27:42	1900-01-01 01:52:44	131.563	76.4256	3.9589	18.4917
2011-09-19 04:35:41	1900-01-01 02:00:00	131.519	76.4298	3.9704	18.3733
2011-09-19 04:43:42	1900-01-01 02:07:15	131.477	76.4337	3.9854	18.214
2011-09-19 04:51:41	1900-01-01 02:14:30	131.431	76.4376	4.0099	18.0789
2011-09-19 04:59:42	1900-01-01 02:21:45	131.388	76.4415	4.041	17.9686
2011-09-19 05:07:42	1900-01-01 02:29:00	131.344	76.4456	4.0678	17.8721
2011-09-19 05:15:41	1900-01-01 02:36:16	131.301	76.4496	4.0894	17.7986
2011-09-19 05:23:42	1900-01-01 02:43:31	131.256	76.4535	4.0982	17.7548
2011-09-19 05:31:41	1900-01-01 02:50:46	131.211	76.4573	4.079	17.7256
2011-09-19 05:39:42	1900-01-01 02:58:01	131.167	76.4613	4.0774	17.6989
2011-09-19 05:47:41	1900-01-01 03:05:16	131.125	76.4653	4.0549	17.7034
2011-09-19 05:55:42	1900-01-01 03:12:32	131.082	76.4694	4.0415	17.9162
2011-09-19 06:03:41	1900-01-01 03:19:47	131.05	76.4754	4.0238	18.1202
2011-09-19 06:11:42	1900-01-01 03:27:02	131.082	76.4716	4.0165	18.2865
2011-09-19 06:19:42	1900-01-01 03:34:17	131.127	76.467	4.0102	18.3434
2011-09-19 06:27:41	1900-01-01 03:41:32	131.121	76.4664	4.025	18.3562
2011-09-19 06:35:42	1900-01-01 03:48:48	131.076	76.4707	4.0274	18.3906
2011-09-19 06:43:41	1900-01-01 03:56:03	131.03	76.4741	4.0245	18.4186
2011-09-19 06:51:42	1900-01-01 04:03:18	130.985	76.4778	4.0187	18.4179
2011-09-19 06:59:41	1900-01-01 04:10:33	130.942	76.4819	4.0092	18.4677
2011-09-19 07:07:42	1900-01-01 04:17:49	130.899	76.4858	3.9955	18.4683
2011-09-19 07:15:41	1900-01-01 04:25:04	130.852	76.4898	4.0281	18.4627
2011-09-19 07:23:42	1900-01-01 04:32:19	130.808	76.494	4.0165	18.4868
2011-09-19 07:31:42	1900-01-01 04:39:34	130.765	76.4979	4.0352	18.4628
2011-09-19 07:39:41	1900-01-01 04:46:49	130.721	76.5016	4.0936	18.8677
2011-09-19 07:47:42	1900-01-01 04:54:05	130.678	76.5055	4.0636	19.1651
2011-09-19 07:55:41	1900-01-01 05:01:20	130.634	76.5094	4.066	19.1904
2011-09-19 08:03:42	1900-01-01 05:08:35	130.589	76.5135	4.1197	19.2212
2011-09-19 08:11:41	1900-01-01 05:15:50	130.544	76.518	4.1154	19.2482
2011-09-19 08:19:42	1900-01-01 05:23:05	130.501	76.5219	4.1314	19.2618
2011-09-19 08:27:41	1900-01-01 05:30:21	130.455	76.5256	4.1539	19.2863
2011-09-19 08:35:42	1900-01-01 05:37:36	130.411	76.5295	4.1698	19.3143
2011-09-19 08:43:42	1900-01-01 05:44:51	130.364	76.5337	4.1715	19.335
2011-09-19 08:51:41	1900-01-01 05:52:06	130.319	76.538	4.0959	19.3588
2011-09-19 08:59:42	1900-01-01 05:59:21	130.277	76.5423	4.0681	19.3275
2011-09-19 09:07:41	1900-01-01 06:06:37	130.235	76.546	4.1224	19.3031
2011-09-19 09:15:42	1900-01-01 06:13:52	130.191	76.5497	4.1265	19.3497
2011-09-19 09:23:41	1900-01-01 06:21:07	130.149	76.553	4.0722	19.4527
2011-09-19 09:31:42	1900-01-01 06:28:22	130.137	76.554	4.1194	19.4806
2011-09-19 09:39:41	1900-01-01 06:35:37	130.134	76.5557	4.1739	19.4543
2011-09-19 09:47:42	1900-01-01 06:42:53	130.134	76.557	4.2188	19.6284
2011-09-19 09:55:42	1900-01-01 06:50:08	130.139	76.5576	4.2439	19.7704
2011-09-19 10:03:41	1900-01-01 06:57:23	130.144	76.5672	4.2345	19.8492
2011-09-19 10:11:42	1900-01-01 07:04:38	130.152	76.5785	4.2769	19.8692
2011-09-19 10:19:41	1900-01-01 07:11:54	130.159	76.5905	4.2771	19.9964
2011-09-19 10:27:42	1900-01-01 07:19:09	130.165	76.602	4.3522	20.06
2011-09-19 10:35:41	1900-01-01 07:26:24	130.171	76.6136	4.3535	20.1213
2011-09-19 10:43:42	1900-01-01 07:33:39	130.179	76.6253	4.3207	20.1654
2011-09-19 10:51:41	1900-01-01 07:40:54	130.185	76.637	4.3072	20.2769
2011-09-19 10:59:42	1900-01-01 07:48:10	130.19	76.6487	4.2983	20.3695
2011-09-19 11:07:42	1900-01-01 07:55:25	130.197	76.6605	4.298	20.403
2011-09-19 11:15:41	1900-01-01 08:02:40	130.203	76.6723	4.3086	20.4211
2011-09-19 11:23:42	1900-01-01 08:09:55	130.209	76.6841	4.3073	20.465
2011-09-19 11:31:41	1900-01-01 08:17:10	130.214	76.6958	4.2857	20.4575
2011-09-19 11:39:42	1900-01-01 08:24:26	130.22	76.7074	4.2013	20.4379
2011-09-19 11:47:41	1900-01-01 08:31:41	130.227	76.7191	4.1534	20.4214
2011-09-19 11:55:42	1900-01-01 08:38:56	130.23	76.7306	4.0703	20.3816
2011-09-19 12:03:41	1900-01-01 08:46:11	130.236	76.7425	4.0251	20.3576
2011-09-19 12:11:42	1900-01-01 08:53:26	130.242	76.7542	3.9765	20.3639
2011-09-19 12:19:42	1900-01-01 09:00:42	130.246	76.7659	3.9217	20.3853
2011-09-19 12:27:41	1900-01-01 09:07:57	130.252	76.7775	3.873	20.3773
2011-09-19 12:35:42	1900-01-01 09:15:12	130.258	76.7893	3.8519	20.3839
2011-09-19 12:43:41	1900-01-01 09:22:27	130.263	76.8008	3.8534	20.4383
2011-09-19 12:51:42	1900-01-01 09:29:43	130.268	76.8123	3.8917	20.4772
2011-09-19 12:59:41	1900-01-01 09:36:58	130.273	76.8237	3.9413	20.4976
2011-09-19 13:07:42	1900-01-01 09:44:13	130.28	76.8352	3.9327	20.5074
2011-09-19 13:15:41	1900-01-01 09:51:28	130.285	76.8468	3.93	20.5403
2011-09-19 13:23:42	1900-01-01 09:58:43	130.291	76.8585	3.9522	20.5556
2011-09-19 13:31:42	1900-01-01 10:05:59	130.296	76.8699	3.9538	20.5723
2011-09-19 13:39:41	1900-01-01 10:13:14	130.302	76.8813	3.9486	20.6213
2011-09-19 13:47:42	1900-01-01 10:20:29	130.307	76.8929	4.0894	20.6099
2011-09-19 13:55:41	1900-01-01 10:27:44	130.313	76.9045	4.1168	20.6303
2011-09-19 14:03:42	1900-01-01 10:34:59	130.319	76.9159	4.1676	20.6391
2011-09-19 14:11:41	1900-01-01 10:42:15	130.325	76.9274	4.2436	20.6652
2011-09-19 14:19:42	1900-01-01 10:49:30	130.331	76.9389	4.2483	20.7336
2011-09-19 14:27:41	1900-01-01 10:56:45	130.336	76.9505	4.2802	20.7568
2011-09-19 14:35:42	1900-01-01 11:04:00	130.342	76.962	4.2747	20.7889
2011-09-19 14:43:42	1900-01-01 11:11:15	130.347	76.9737	4.2488	20.8001
2011-09-19 14:51:41	1900-01-01 11:18:31	130.353	76.9857	4.2607	20.7758
2011-09-19 14:59:42	1900-01-01 11:25:46	130.358	76.9976	4.2564	20.6572
2011-09-19 15:07:41	1900-01-01 11:33:01	130.364	77.0096	4.2699	20.6078
2011-09-19 15:15:42	1900-01-01 11:40:16	130.371	77.0214	4.2593	20.6191
2011-09-19 15:23:41	1900-01-01 11:47:31	130.378	77.0333	4.229	20.6778
2011-09-19 15:31:42	1900-01-01 11:54:47	130.384	77.0453	4.2243	20.6732
2011-09-19 15:39:41	1900-01-01 12:02:02	130.389	77.0569	4.2128	20.6889
2011-09-19 15:47:42	1900-01-01 12:09:17	130.395	77.0684	4.2087	20.8697
2011-09-19 15:55:42	1900-01-01 12:16:32	130.4	77.0798	4.2095	21.031
2011-09-19 16:03:41	1900-01-01 12:23:48	130.406	77.0913	4.1276	21.0998
2011-09-19 16:11:42	1900-01-01 12:31:03	130.411	77.1029	3.9817	21.1489
2011-09-19 16:19:41	1900-01-01 12:38:18	130.417	77.1141	3.8754	21.1181
2011-09-19 16:27:42	1900-01-01 12:45:33	130.423	77.1254	3.757	21.0501
2011-09-19 16:35:41	1900-01-01 12:52:48	130.428	77.1365	3.7381	20.9543
2011-09-19 16:43:42	1900-01-01 13:00:04	130.435	77.1481	3.766	20.9173
2011-09-19 16:51:41	1900-01-01 13:07:19	130.44	77.159	3.8072	20.9197
2011-09-19 16:59:42	1900-01-01 13:14:34	130.447	77.1701	3.7848	20.9761
2011-09-19 17:07:42	1900-01-01 13:21:49	130.452	77.1813	3.7691	21.0245
2011-09-19 17:15:41	1900-01-01 13:29:04	130.456	77.1927	3.7792	21.0686
2011-09-19 17:23:42	1900-01-01 13:36:20	130.461	77.2028	3.7535	21.0058
2011-09-19 17:31:41	1900-01-01 13:43:35	130.471	77.2097	3.7254	20.9812
2011-09-19 17:39:42	1900-01-01 13:50:50	130.475	77.2113	3.733	21.0189
2011-09-19 17:47:41	1900-01-01 13:58:05	130.479	77.2128	3.7103	21.0155
2011-09-19 17:55:42	1900-01-01 14:05:20	130.483	77.2143	3.6891	21.0093
2011-09-19 18:03:41	1900-01-01 14:12:36	130.489	77.2157	3.6903	21.0441
2011-09-19 18:11:42	1900-01-01 14:19:51	130.502	77.2131	3.7064	21.1079
2011-09-19 18:19:42	1900-01-01 14:27:06	130.452	77.2146	3.7201	21.1889
2011-09-19 18:27:41	1900-01-01 14:34:21	130.411	77.2225	3.6773	21.2402
2011-09-19 18:35:42	1900-01-01 14:41:37	130.392	77.2242	3.6822	21.2207
2011-09-19 18:43:41	1900-01-01 14:48:52	130.425	77.2187	3.6843	21.1822
2011-09-19 18:51:42	1900-01-01 14:56:07	130.446	77.2144	3.6589	21.1656
2011-09-19 18:59:41	1900-01-01 15:03:22	130.422	77.218	3.6631	21.179
2011-09-19 19:07:42	1900-01-01 15:10:37	130.394	77.2265	3.6826	21.1862
2011-09-19 19:15:41	1900-01-01 15:17:53	130.364	77.2345	3.692	21.1902
2011-09-19 19:23:42	1900-01-01 15:25:08	130.332	77.2424	3.6912	21.1741
2011-09-19 19:31:42	1900-01-01 15:32:23	130.3	77.2503	3.6939	21.1936
2011-09-19 19:39:41	1900-01-01 15:39:38	130.269	77.2584	3.6862	21.2198
2011-09-19 19:47:42	1900-01-01 15:46:54	130.236	77.2665	3.6599	21.2567
2011-09-19 19:55:41	1900-01-01 15:54:09	130.202	77.275	3.6224	21.6909
2011-09-19 20:03:42	1900-01-01 16:01:24	130.172	77.2831	3.4888	22.6753
2011-09-19 20:11:41	1900-01-01 16:08:39	130.141	77.291	3.4948	23.123
2011-09-19 20:19:42	1900-01-01 16:15:54	130.105	77.2995	3.5159	23.1968
2011-09-19 20:27:41	1900-01-01 16:23:10	130.07	77.308	3.4687	23.2451
2011-09-19 20:35:42	1900-01-01 16:30:25	130.036	77.3168	3.4586	23.2891
2011-09-19 20:43:42	1900-01-01 16:37:40	130.003	77.3256	3.4854	23.3118
2011-09-19 20:51:41	1900-01-01 16:44:55	129.968	77.3339	3.4833	23.3337
2011-09-19 20:59:42	1900-01-01 16:52:11	129.932	77.3421	3.3826	23.2882
2011-09-19 21:07:41	1900-01-01 16:59:26	129.898	77.3504	3.3845	22.7766
2011-09-19 21:15:42	1900-01-01 17:06:41	129.864	77.3586	3.4198	22.3217
2011-09-19 21:23:41	1900-01-01 17:13:56	129.831	77.3666	3.4431	22.0788
2011-09-19 21:31:42	1900-01-01 17:21:11	129.796	77.3746	3.4725	21.8993
2011-09-19 21:39:41	1900-01-01 17:28:27	129.766	77.3836	3.5174	21.8249
2011-09-19 21:47:42	1900-01-01 17:35:42	129.734	77.3922	3.5686	21.8312
2011-09-19 21:55:42	1900-01-01 17:42:57	129.701	77.4003	3.6133	21.841
2011-09-19 22:03:41	1900-01-01 17:50:12	129.665	77.4091	3.6328	21.8718
2011-09-19 22:11:42	1900-01-01 17:57:28	129.632	77.4174	3.6922	21.8881
2011-09-19 22:19:41	1900-01-01 18:04:43	129.599	77.4258	3.7503	21.8796
2011-09-19 22:27:42	1900-01-01 18:11:58	129.564	77.4346	3.7998	21.8816
2011-09-19 22:35:41	1900-01-01 18:19:13	129.531	77.4425	3.7019	21.894
2011-09-19 22:43:42	1900-01-01 18:26:28	129.498	77.4502	3.7117	21.8536
2011-09-19 22:51:41	1900-01-01 18:33:44	129.462	77.4586	3.7474	21.8781
2011-09-19 22:59:42	1900-01-01 18:40:59	129.442	77.4592	3.7058	22.4045
2011-09-19 23:07:42	1900-01-01 18:48:14	129.48	77.4525	3.6746	22.8155
2011-09-19 23:15:41	1900-01-01 18:55:29	129.497	77.4511	3.7268	22.8718
2011-09-19 23:20:57	1900-01-01 19:02:45	129.518	77.4477	3.7681	22.8532
2011-09-19 23:20:57	1900-01-01 19:10:00	129.545	77.44	3.7548	22.7468
2011-09-19 23:20:57	1900-01-01 19:17:15	129.552	77.4401	3.7163	22.3695
2011-09-19 23:20:57	1900-01-01 19:24:30	129.555	77.4415	3.701	22.2466
2011-09-19 23:20:57	1900-01-01 19:31:45	129.557	77.443	3.703	22.2017
2011-09-19 23:20:57	1900-01-01 19:39:01	129.559	77.4445	3.6664	22.1709
2011-09-19 23:20:57	1900-01-01 19:46:16	129.564	77.4459	3.6333	22.0215
2011-09-19 23:20:57	1900-01-01 19:53:31	129.608	77.4444	3.6057	21.9345
2011-09-19 23:20:57	1900-01-01 20:00:46	129.66	77.4427	3.614	21.8602
2011-09-19 23:20:57	1900-01-01 20:08:02	129.716	77.4408	3.7139	21.7763
2011-09-19 23:20:57	1900-01-01 20:15:17	129.771	77.4387	3.7811	21.8097
2011-09-19 23:20:57	1900-01-01 20:22:32	129.824	77.4369	3.7701	21.863
2011-09-19 23:20:57	1900-01-01 20:29:47	129.877	77.435	3.7145	21.906
2011-09-19 23:20:57	1900-01-01 20:37:03	129.929	77.4332	3.6674	21.9375
2011-09-19 23:20:57	1900-01-01 20:44:18	129.981	77.4314	3.6259	21.9559
2011-09-19 23:20:57	1900-01-01 20:51:33	130.032	77.4295	3.5639	21.9855
2011-09-19 23:20:57	1900-01-01 20:58:48	130.087	77.4275	3.4937	22.0139
2011-09-19 23:20:57	1900-01-01 21:06:03	130.138	77.4258	3.4493	21.9809
2011-09-19 23:20:57	1900-01-01 21:13:19	130.189	77.4244	3.4081	21.9858
2011-09-19 23:20:57	1900-01-01 21:20:34	130.244	77.4227	3.3654	22.0482
2011-09-19 23:20:57	1900-01-01 21:27:49	130.296	77.4211	3.2763	22.0368
2011-09-19 23:20:57	1900-01-01 21:35:04	130.351	77.4191	3.2077	22.2459
2011-09-19 23:20:57	1900-01-01 21:42:20	130.407	77.4172	3.1778	22.5602
2011-09-19 23:20:57	1900-01-01 21:49:35	130.463	77.4154	3.1821	22.7052
2011-09-19 23:20:57	1900-01-01 21:56:50	130.517	77.4136	3.2174	22.8006
2011-09-19 23:20:57	1900-01-01 22:04:05	130.571	77.4115	3.2408	22.9157
2011-09-19 23:20:57	1900-01-01 22:11:20	130.627	77.4095	3.2549	23.0361
2011-09-19 23:20:57	1900-01-01 22:18:36	130.681	77.4078	3.2445	23.1668
2011-09-19 23:20:57	1900-01-01 22:25:51	130.736	77.406	3.458	23.138
2011-09-19 23:20:57	1900-01-01 22:33:06	130.788	77.4039	3.7274	22.4519
2011-09-19 23:20:57	1900-01-01 22:40:21	130.84	77.402	4.0301	21.9347
2011-09-19 23:20:57	1900-01-01 22:47:37	130.891	77.4003	4.1069	21.6937
2011-09-19 23:20:57	1900-01-01 22:54:52	130.944	77.3985	4.0626	21.6422
2011-09-19 23:20:57	1900-01-01 23:02:07	130.996	77.3969	3.9303	21.6716
2011-09-19 23:20:57	1900-01-01 23:09:22	131.05	77.3952	3.8636	21.6561
2011-09-19 23:20:57	1900-01-01 23:16:37	131.106	77.3932	3.852	21.8033
2011-09-19 23:20:57	1900-01-01 23:23:53	131.16	77.3914	3.8856	21.9151
2011-09-19 23:20:57	1900-01-01 23:31:08	131.214	77.3897	3.8064	21.9796
2011-09-19 23:20:57	1900-01-01 23:38:23	131.268	77.3878	3.8046	22.0156
2011-09-19 23:20:57	1900-01-01 23:45:38	131.322	77.3861	3.771	22.0407
2011-09-19 23:20:57	1900-01-01 23:52:54	131.377	77.3836	3.8559	22.032
2011-09-20 04:51:41	1900-01-02 00:00:09	131.398	77.3827	3.9167	22.0813
2011-09-20 04:59:42	1900-01-02 00:07:24	131.403	77.3845	3.9255	22.0668
2011-09-20 05:07:42	1900-01-02 00:14:39	131.402	77.3866	3.9237	22.0608
2011-09-20 05:15:41	1900-01-02 00:21:54	131.403	77.3884	3.9215	22.0557
2011-09-20 05:23:42	1900-01-02 00:29:10	131.385	77.3814	3.9398	22.0597
2011-09-20 05:31:41	1900-01-02 00:36:25	131.35	77.3736	3.9246	22.0404
2011-09-20 05:39:42	1900-01-02 00:43:40	131.312	77.3656	3.8095	22.0929
2011-09-20 05:47:41	1900-01-02 00:50:55	131.276	77.358	3.7734	22.1023
2011-09-20 05:55:42	1900-01-02 00:58:11	131.237	77.3504	3.8226	22.0777
2011-09-20 06:03:41	1900-01-02 01:05:26	131.2	77.3431	3.8888	21.9808
2011-09-20 06:11:42	1900-01-02 01:12:41	131.164	77.3361	3.9556	21.9026
2011-09-20 06:19:42	1900-01-02 01:19:56	131.127	77.3288	4.0973	21.7645
2011-09-20 06:27:41	1900-01-02 01:27:11	131.091	77.3214	4.1174	21.6164
2011-09-20 06:35:42	1900-01-02 01:34:27	131.055	77.3141	4.1727	21.6067
2011-09-20 06:43:41	1900-01-02 01:41:42	131.017	77.3067	4.1848	21.6515
2011-09-20 06:51:42	1900-01-02 01:48:57	130.981	77.2992	4.2265	21.6496
2011-09-20 06:59:41	1900-01-02 01:56:12	130.944	77.2918	4.2545	21.6021
2011-09-20 07:07:42	1900-01-02 02:03:28	130.907	77.2846	4.2683	21.5297
2011-09-20 07:15:41	1900-01-02 02:10:43	130.872	77.2771	4.2676	21.4774
2011-09-20 07:23:42	1900-01-02 02:17:58	130.832	77.2693	4.2537	21.4421
2011-09-20 07:31:42	1900-01-02 02:25:13	130.798	77.2621	4.1121	21.4905
2011-09-20 07:39:41	1900-01-02 02:32:28	130.756	77.2574	4.024	21.518
2011-09-20 07:47:42	1900-01-02 02:39:44	130.711	77.2525	3.8433	21.5686
2011-09-20 07:55:41	1900-01-02 02:46:59	130.664	77.2472	3.7439	21.5838
2011-09-20 08:03:42	1900-01-02 02:54:14	130.617	77.2423	3.7013	21.6089
2011-09-20 08:11:41	1900-01-02 03:01:29	130.57	77.2373	3.6744	21.5617
2011-09-20 08:19:42	1900-01-02 03:08:45	130.524	77.2322	3.6731	21.4384
2011-09-20 08:27:41	1900-01-02 03:16:00	130.477	77.2272	3.6743	21.3177
2011-09-20 08:35:42	1900-01-02 03:23:15	130.436	77.2224	3.6377	21.2989
2011-09-20 08:43:42	1900-01-02 03:30:30	130.417	77.2204	3.6158	21.4162
2011-09-20 08:51:41	1900-01-02 03:37:45	130.429	77.2199	3.6537	21.7341
2011-09-20 08:59:42	1900-01-02 03:45:01	130.446	77.2251	3.8218	21.7776
2011-09-20 09:07:41	1900-01-02 03:52:16	130.454	77.2258	3.9206	21.8377
2011-09-20 09:15:42	1900-01-02 03:59:31	130.447	77.2241	3.9587	21.8961
2011-09-20 09:23:41	1900-01-02 04:06:46	130.449	77.2238	3.9762	21.9154
2011-09-20 09:31:42	1900-01-02 04:14:02	130.459	77.2249	3.7919	21.9661
2011-09-20 09:39:41	1900-01-02 04:21:17	130.434	77.2236	3.7139	21.9412
2011-09-20 09:47:42	1900-01-02 04:28:32	130.387	77.2284	3.7012	21.8831
2011-09-20 09:55:42	1900-01-02 04:35:47	130.363	77.2373	3.7524	21.8647
2011-09-20 10:03:41	1900-01-02 04:43:02	130.376	77.2314	3.7239	22.081
2011-09-20 10:11:42	1900-01-02 04:50:18	130.378	77.2238	3.7436	22.0549
2011-09-20 10:19:41	1900-01-02 04:57:33	130.351	77.2147	3.7678	22.1545
2011-09-20 10:27:42	1900-01-02 05:04:48	130.322	77.2051	3.7515	22.3039
2011-09-20 10:35:41	1900-01-02 05:12:03	130.293	77.1955	3.7122	22.1321
2011-09-20 10:43:42	1900-01-02 05:19:19	130.263	77.1864	3.7052	21.6773
2011-09-20 10:51:41	1900-01-02 05:26:34	130.234	77.1774	3.6907	21.5204
2011-09-20 10:59:42	1900-01-02 05:33:49	130.209	77.1692	3.6223	21.4848
2011-09-20 11:07:42	1900-01-02 05:41:04	130.183	77.1608	3.644	21.4955
2011-09-20 11:15:41	1900-01-02 05:48:19	130.157	77.1518	3.5901	21.4857
2011-09-20 11:23:42	1900-01-02 05:55:35	130.131	77.1432	3.597	21.5009
2011-09-20 11:31:41	1900-01-02 06:02:50	130.105	77.1349	3.5967	21.5102
2011-09-20 11:39:42	1900-01-02 06:10:05	130.079	77.1258	3.6094	21.4312
2011-09-20 11:47:41	1900-01-02 06:17:20	130.051	77.1169	3.6105	21.359
2011-09-20 11:55:42	1900-01-02 06:24:36	130.025	77.1081	3.613	21.3397
2011-09-20 12:03:41	1900-01-02 06:31:51	130.003	77.1008	3.5576	21.3733
2011-09-20 12:11:42	1900-01-02 06:39:06	130.011	77.1017	3.6299	21.3501
2011-09-20 12:19:42	1900-01-02 06:46:21	130.014	77.1037	3.6446	21.2996
2011-09-20 12:27:41	1900-01-02 06:53:36	130.02	77.1056	3.6458	21.2648
2011-09-20 12:35:42	1900-01-02 07:00:52	130.035	77.1085	3.5725	21.2879
2011-09-20 12:43:41	1900-01-02 07:08:07	130.006	77.113	3.4847	21.2917
2011-09-20 12:51:42	1900-01-02 07:15:22	129.96	77.1173	3.4759	21.2746
2011-09-20 12:59:41	1900-01-02 07:22:37	129.915	77.1214	3.5022	21.2786
2011-09-20 13:07:42	1900-01-02 07:29:53	129.869	77.1255	3.5429	21.4055
2011-09-20 13:15:41	1900-01-02 07:37:08	129.825	77.1296	3.509	21.5073
2011-09-20 13:23:42	1900-01-02 07:44:23	129.78	77.1336	3.5169	21.6036
2011-09-20 13:31:42	1900-01-02 07:51:38	129.737	77.1377	3.5337	21.7034
2011-09-20 13:39:41	1900-01-02 07:58:53	129.694	77.1415	3.5279	21.749
2011-09-20 13:47:42	1900-01-02 08:06:09	129.651	77.1455	3.5268	21.7692
2011-09-20 13:55:41	1900-01-02 08:13:24	129.609	77.1494	3.5176	21.8263
2011-09-20 14:03:42	1900-01-02 08:20:39	129.566	77.1533	3.5162	21.8719
2011-09-20 14:11:41	1900-01-02 08:27:54	129.523	77.1572	3.5254	21.8927
2011-09-20 14:19:42	1900-01-02 08:35:10	129.479	77.1612	3.5591	21.8919
2011-09-20 14:27:41	1900-01-02 08:42:25	129.435	77.1651	3.5635	21.8985
2011-09-20 14:35:42	1900-01-02 08:49:40	129.39	77.1691	3.5612	21.9162
2011-09-20 14:43:42	1900-01-02 08:56:55	129.346	77.1718	3.5558	21.8899
2011-09-20 14:51:41	1900-01-02 09:04:10	129.328	77.1635	3.5419	21.9629
2011-09-20 14:59:42	1900-01-02 09:11:26	129.314	77.1545	3.5529	22.0174
2011-09-20 15:07:41	1900-01-02 09:18:41	129.267	77.1512	3.544	21.9297
2011-09-20 15:15:42	1900-01-02 09:25:56	129.224	77.1475	3.5395	21.8002
2011-09-20 15:23:41	1900-01-02 09:33:11	129.183	77.1436	3.5251	21.7225
2011-09-20 15:31:42	1900-01-02 09:40:27	129.14	77.14	3.5016	21.682
2011-09-20 15:39:41	1900-01-02 09:47:42	129.105	77.1356	3.5158	21.5152
2011-09-20 15:47:42	1900-01-02 09:54:57	129.07	77.1328	3.6257	21.6902
2011-09-20 15:55:42	1900-01-02 10:02:12	129.037	77.1301	3.6537	21.9751
2011-09-20 16:03:41	1900-01-02 10:09:27	129	77.1269	3.6522	21.9954
2011-09-20 16:11:42	1900-01-02 10:16:43	128.954	77.1228	3.6413	21.8741
2011-09-20 16:19:41	1900-01-02 10:23:58	128.908	77.1186	3.6233	21.6963
2011-09-20 16:27:42	1900-01-02 10:31:13	128.862	77.1143	3.6083	21.5148
2011-09-20 16:35:41	1900-01-02 10:38:28	128.815	77.11	3.6043	21.3432
2011-09-20 16:43:42	1900-01-02 10:45:44	128.769	77.1058	3.6012	21.1771
2011-09-20 16:51:41	1900-01-02 10:52:59	128.723	77.1016	3.598	21.0515
2011-09-20 16:59:42	1900-01-02 11:00:14	128.681	77.0999	3.5978	20.9487
2011-09-20 17:07:42	1900-01-02 11:07:29	128.729	77.1041	3.6006	20.8695
2011-09-20 17:15:41	1900-01-02 11:14:44	128.774	77.1059	3.5966	20.8432
2011-09-20 17:23:42	1900-01-02 11:22:00	128.789	77.1074	3.5913	20.8425
2011-09-20 17:31:41	1900-01-02 11:29:15	128.795	77.1078	3.5906	20.8317
2011-09-20 17:39:42	1900-01-02 11:36:30	128.81	77.1087	3.8373	20.7771
2011-09-20 17:47:41	1900-01-02 11:43:45	128.826	77.1109	3.9651	20.8959
2011-09-20 17:55:42	1900-01-02 11:51:01	128.793	77.108	4.0128	20.862
2011-09-20 18:03:41	1900-01-02 11:58:16	128.783	77.1071	4.0529	20.9296
2011-09-20 18:11:42	1900-01-02 12:05:31	128.798	77.1077	4.0947	20.8833
2011-09-20 18:19:42	1900-01-02 12:12:46	128.81	77.1071	3.8567	20.9163
2011-09-20 18:27:41	1900-01-02 12:20:01	128.772	77.105	3.7422	20.847
2011-09-20 18:35:42	1900-01-02 12:27:17	128.726	77.1013	3.7085	20.8096
2011-09-20 18:43:41	1900-01-02 12:34:32	128.681	77.097	3.6736	20.7792
2011-09-20 18:51:42	1900-01-02 12:41:47	128.636	77.0929	3.6602	20.7282
2011-09-20 18:59:41	1900-01-02 12:49:02	128.59	77.0888	3.6469	20.6625
2011-09-20 19:07:42	1900-01-02 12:56:18	128.542	77.0845	3.6351	20.5778
2011-09-20 19:15:41	1900-01-02 13:03:33	128.494	77.0803	3.6268	20.4925
2011-09-20 19:23:42	1900-01-02 13:10:48	128.447	77.0759	3.6098	20.4227
2011-09-20 19:31:42	1900-01-02 13:18:03	128.398	77.0713	3.593	20.343
2011-09-20 19:39:41	1900-01-02 13:25:19	128.349	77.0668	3.5744	20.2884
2011-09-20 19:47:42	1900-01-02 13:32:34	128.304	77.0628	3.5484	20.2629
2011-09-20 19:55:41	1900-01-02 13:39:49	128.258	77.0584	3.5222	20.2339
2011-09-20 20:03:42	1900-01-02 13:47:04	128.21	77.0541	3.4985	20.2196
2011-09-20 20:11:41	1900-01-02 13:54:19	128.169	77.05	3.6988	20.1625
2011-09-20 20:19:42	1900-01-02 14:01:35	128.175	77.0505	3.8824	20.1685
2011-09-20 20:27:41	1900-01-02 14:08:50	128.176	77.0519	3.9758	20.2137
2011-09-20 20:35:42	1900-01-02 14:16:05	128.183	77.0542	4.0162	20.2456
2011-09-20 20:43:42	1900-01-02 14:23:20	128.19	77.0565	4.0617	20.2505
2011-09-20 20:51:41	1900-01-02 14:30:36	128.203	77.0567	3.7977	20.3466
2011-09-20 20:59:42	1900-01-02 14:37:51	128.165	77.0503	3.67	20.2974
2011-09-20 21:07:41	1900-01-02 14:45:06	128.116	77.049	3.5948	20.2725
2011-09-20 21:15:42	1900-01-02 14:52:21	128.067	77.0478	3.5642	20.2873
2011-09-20 21:23:41	1900-01-02 14:59:36	128.017	77.0465	3.5399	20.3139
2011-09-20 21:31:42	1900-01-02 15:06:52	127.967	77.0454	3.5221	20.3559
2011-09-20 21:39:41	1900-01-02 15:14:07	127.917	77.0444	3.5147	20.4017
2011-09-20 21:47:42	1900-01-02 15:21:22	127.867	77.0434	3.5167	20.4412
2011-09-20 21:55:42	1900-01-02 15:28:37	127.817	77.0421	3.5399	20.4619
2011-09-20 22:03:41	1900-01-02 15:35:53	127.766	77.0411	3.5571	20.4536
2011-09-20 22:11:42	1900-01-02 15:43:08	127.714	77.04	3.5539	20.4245
2011-09-20 22:19:41	1900-01-02 15:50:23	127.662	77.0387	3.4959	21.1596
2011-09-20 22:27:42	1900-01-02 15:57:38	127.612	77.0375	3.5116	23.1217
2011-09-20 22:35:41	1900-01-02 16:04:53	127.565	77.0363	3.5295	23.9961
2011-09-20 22:43:42	1900-01-02 16:12:09	127.517	77.0346	3.6741	24.8842
2011-09-20 22:51:41	1900-01-02 16:19:24	127.468	77.0335	3.6267	25.4968
2011-09-20 22:59:42	1900-01-02 16:26:39	127.421	77.0325	3.5481	25.5963
2011-09-20 23:07:42	1900-01-02 16:33:54	127.373	77.0317	3.5813	24.3882
2011-09-20 23:15:41	1900-01-02 16:41:10	127.327	77.0307	3.7997	23.985
2011-09-20 23:23:42	1900-01-02 16:48:25	127.281	77.0299	3.9913	24.0645
2011-09-20 23:31:41	1900-01-02 16:55:40	127.234	77.0289	4.0431	23.997
2011-09-20 23:37:57	1900-01-02 17:02:55	127.187	77.0277	4.3482	24.2472
2011-09-20 23:37:57	1900-01-02 17:10:10	127.138	77.0266	3.9536	26.4644
2011-09-20 23:37:57	1900-01-02 17:17:26	127.089	77.0251	3.7828	28.1298
2011-09-20 23:37:57	1900-01-02 17:24:41	127.039	77.0239	3.6169	29.1231
2011-09-20 23:37:57	1900-01-02 17:31:56	126.99	77.023	3.5915	29.4123
2011-09-20 23:37:57	1900-01-02 17:39:11	126.94	77.0221	3.6069	29.472
2011-09-20 23:37:57	1900-01-02 17:46:27	126.891	77.0211	3.6389	29.5042
2011-09-20 23:37:57	1900-01-02 17:53:42	126.842	77.0198	3.67	29.4974
2011-09-20 23:37:57	1900-01-02 18:00:57	126.793	77.0185	3.7001	29.4573
2011-09-20 23:37:57	1900-01-02 18:08:12	126.743	77.0173	3.7221	29.4098
2011-09-20 23:37:57	1900-01-02 18:15:27	126.701	77.0165	3.6727	29.2919
2011-09-20 23:37:57	1900-01-02 18:22:43	126.66	77.0156	3.5902	28.2998
2011-09-20 23:37:57	1900-01-02 18:29:58	126.618	77.0149	3.5598	27.326
2011-09-20 23:37:57	1900-01-02 18:37:13	126.577	77.0137	3.549	26.7347
2011-09-20 23:37:57	1900-01-02 18:44:28	126.535	77.0126	3.5425	26.419
2011-09-20 23:37:57	1900-01-02 18:51:44	126.491	77.0115	3.5477	26.3139
2011-09-20 23:37:57	1900-01-02 18:58:59	126.445	77.0106	3.5685	26.6074
2011-09-20 23:37:57	1900-01-02 19:06:14	126.394	77.0093	3.6523	27.6382
2011-09-20 23:37:57	1900-01-02 19:13:29	126.343	77.008	3.7124	28.34
2011-09-20 23:37:57	1900-01-02 19:20:45	126.291	77.007	3.7563	28.6096
2011-09-20 23:37:57	1900-01-02 19:28:00	126.241	77.0057	3.8295	28.7158
2011-09-20 23:37:57	1900-01-02 19:35:15	126.191	77.0046	3.9094	28.769
2011-09-20 23:37:57	1900-01-02 19:42:30	126.141	77.0037	3.927	28.8177
2011-09-20 23:37:57	1900-01-02 19:49:45	126.09	77.0023	3.9338	28.8756
2011-09-20 23:37:57	1900-01-02 19:57:01	126.039	77.0012	3.9244	28.8728
2011-09-20 23:37:57	1900-01-02 20:04:16	125.99	77.0007	3.9294	28.8518
2011-09-20 23:37:57	1900-01-02 20:11:31	125.983	76.9992	3.9339	28.891
2011-09-20 23:37:57	1900-01-02 20:18:46	125.988	76.9971	3.9187	28.9996
2011-09-20 23:37:57	1900-01-02 20:26:02	125.992	76.9953	3.9073	29.0402
2011-09-20 23:37:57	1900-01-02 20:33:17	125.988	76.993	3.9021	29.0821
2011-09-20 23:37:57	1900-01-02 20:40:32	125.978	76.9816	3.9071	29.0438
2011-09-20 23:37:57	1900-01-02 20:47:47	125.973	76.97	3.8997	29.0226
2011-09-20 23:37:57	1900-01-02 20:55:02	125.972	76.9579	3.9088	28.9523
2011-09-20 23:37:57	1900-01-02 21:02:18	125.968	76.9455	3.9134	28.8462
2011-09-20 23:37:57	1900-01-02 21:09:33	125.964	76.933	3.9173	28.793
2011-09-20 23:37:57	1900-01-02 21:16:48	125.96	76.9204	3.8962	28.7797
2011-09-20 23:37:57	1900-01-02 21:24:03	125.956	76.908	3.882	28.7835
2011-09-20 23:37:57	1900-01-02 21:31:19	125.953	76.8956	3.8899	28.8075
2011-09-20 23:37:57	1900-01-02 21:38:34	125.949	76.8828	3.9036	28.8029
2011-09-20 23:37:57	1900-01-02 21:45:49	125.945	76.8699	3.9186	28.6753
2011-09-20 23:37:57	1900-01-02 21:53:04	125.94	76.8569	3.9416	28.5349
2011-09-20 23:37:57	1900-01-02 22:00:19	125.936	76.8441	3.9505	28.3739
2011-09-20 23:37:57	1900-01-02 22:07:35	125.936	76.8315	3.9493	28.2
2011-09-20 23:37:57	1900-01-02 22:14:50	125.929	76.8187	3.9531	27.9682
2011-09-20 23:37:57	1900-01-02 22:22:05	125.925	76.8057	3.9394	27.7412
2011-09-20 23:37:57	1900-01-02 22:29:20	125.921	76.7931	3.8892	27.4668
2011-09-20 23:37:57	1900-01-02 22:36:35	125.918	76.781	3.8383	27.1255
2011-09-20 23:37:57	1900-01-02 22:43:51	125.914	76.7687	3.7961	26.8528
2011-09-20 23:37:57	1900-01-02 22:51:06	125.91	76.7563	3.7136	26.5589
2011-09-20 23:37:57	1900-01-02 22:58:21	125.906	76.7436	3.5179	25.6887
2011-09-20 23:37:57	1900-01-02 23:05:36	125.905	76.7366	3.4784	24.7418
2011-09-20 23:37:57	1900-01-02 23:12:51	125.907	76.7335	3.4502	24.4344
2011-09-20 23:37:57	1900-01-02 23:20:07	125.91	76.7306	3.4257	24.2052
2011-09-20 23:37:57	1900-01-02 23:27:22	125.905	76.7276	3.4131	24.0557
2011-09-20 23:37:57	1900-01-02 23:34:37	125.899	76.7174	3.3902	23.954
2011-09-20 23:37:57	1900-01-02 23:41:52	125.893	76.7054	3.3506	23.7642
2011-09-20 23:37:57	1900-01-02 23:49:08	125.89	76.6941	3.3247	23.3617
2011-09-20 23:37:57	1900-01-02 23:56:23	125.884	76.6824	3.3365	22.5302
2011-09-21 07:23:42	1900-01-03 00:03:38	125.88	76.6712	3.3421	21.9496
2011-09-21 07:31:42	1900-01-03 00:10:53	125.879	76.6604	3.3376	21.6766
2011-09-21 07:39:41	1900-01-03 00:18:08	125.871	76.65	3.3243	21.5448
2011-09-21 07:47:42	1900-01-03 00:25:24	125.865	76.6392	3.3377	22.1155
2011-09-21 07:55:41	1900-01-03 00:32:39	125.859	76.6278	3.3334	22.4703
2011-09-21 08:03:42	1900-01-03 00:39:54	125.854	76.6161	3.3214	22.514
2011-09-21 08:11:41	1900-01-03 00:47:09	125.85	76.6045	3.3227	22.4616
2011-09-21 08:19:42	1900-01-03 00:54:25	125.843	76.5933	3.3186	22.2657
2011-09-21 08:27:41	1900-01-03 01:01:40	125.839	76.5819	3.3085	22.104
2011-09-21 08:35:42	1900-01-03 01:08:55	125.835	76.5704	3.3066	22.0208
2011-09-21 08:43:42	1900-01-03 01:16:10	125.83	76.5586	3.3088	21.9601
2011-09-21 08:51:41	1900-01-03 01:23:25	125.824	76.5475	3.3281	21.9329
2011-09-21 08:59:42	1900-01-03 01:30:41	125.823	76.5376	3.3525	21.8542
2011-09-21 09:07:41	1900-01-03 01:37:56	125.819	76.5258	3.3546	21.6915
2011-09-21 09:15:42	1900-01-03 01:45:11	125.813	76.514	3.37	21.6032
2011-09-21 09:23:41	1900-01-03 01:52:26	125.805	76.5024	3.3583	21.5822
2011-09-21 09:31:42	1900-01-03 01:59:42	125.803	76.4911	3.3893	21.1241
2011-09-21 09:39:41	1900-01-03 02:06:57	125.796	76.4795	3.3851	20.699
2011-09-21 09:47:42	1900-01-03 02:14:12	125.791	76.4685	3.341	20.6562
2011-09-21 09:55:42	1900-01-03 02:21:27	125.787	76.4567	3.3002	21.229
2011-09-21 10:03:41	1900-01-03 02:28:42	125.781	76.4458	3.2813	21.9582
2011-09-21 10:11:42	1900-01-03 02:35:58	125.776	76.4341	3.2721	22.4069
2011-09-21 10:19:41	1900-01-03 02:43:13	125.772	76.4222	3.2613	22.5124
2011-09-21 10:27:42	1900-01-03 02:50:28	125.768	76.4101	3.2526	22.5622
2011-09-21 10:35:41	1900-01-03 02:57:43	125.763	76.3986	3.2593	22.6094
2011-09-21 10:43:42	1900-01-03 03:04:59	125.754	76.3922	3.309	22.607
2011-09-21 10:51:41	1900-01-03 03:12:14	125.754	76.3896	3.3266	22.3456
2011-09-21 10:59:42	1900-01-03 03:19:29	125.753	76.387	3.3348	22.1246
2011-09-21 11:07:42	1900-01-03 03:26:44	125.749	76.3842	3.3333	21.9963
2011-09-21 11:15:41	1900-01-03 03:33:59	125.715	76.3857	3.3427	21.842
2011-09-21 11:23:42	1900-01-03 03:41:15	125.668	76.3891	3.3576	21.7659
2011-09-21 11:31:41	1900-01-03 03:48:30	125.619	76.392	3.3508	21.7938
2011-09-21 11:39:42	1900-01-03 03:55:45	125.571	76.3947	3.3541	21.9835
2011-09-21 11:47:41	1900-01-03 04:03:00	125.526	76.3973	3.3604	22.0642
2011-09-21 11:55:42	1900-01-03 04:10:16	125.48	76.3998	3.363	22.0969
2011-09-21 12:03:41	1900-01-03 04:17:31	125.476	76.3974	3.3515	22.1058
2011-09-21 12:11:42	1900-01-03 04:24:46	125.471	76.3944	3.3458	22.1083
2011-09-21 12:19:42	1900-01-03 04:32:01	125.437	76.3858	3.3368	22.0558
2011-09-21 12:27:41	1900-01-03 04:39:16	125.415	76.3756	3.341	21.9961
2011-09-21 12:35:42	1900-01-03 04:46:32	125.396	76.3654	3.3528	21.739
2011-09-21 12:43:41	1900-01-03 04:53:47	125.376	76.3556	3.3573	21.4925
2011-09-21 12:51:42	1900-01-03 05:01:02	125.358	76.3458	3.3598	21.1886
2011-09-21 12:59:41	1900-01-03 05:08:17	125.339	76.3359	3.3613	20.8526
2011-09-21 13:07:42	1900-01-03 05:15:33	125.336	76.3295	3.3696	20.6917
2011-09-21 13:15:41	1900-01-03 05:22:48	125.347	76.3363	3.3569	20.3672
2011-09-21 13:23:42	1900-01-03 05:30:03	125.358	76.3412	3.3534	20.2575
2011-09-21 13:31:42	1900-01-03 05:37:18	125.368	76.3469	3.3558	20.2837
2011-09-21 13:39:41	1900-01-03 05:44:33	125.381	76.3532	3.3455	20.3031
2011-09-21 13:47:42	1900-01-03 05:51:49	125.391	76.3581	3.343	20.284
2011-09-21 13:55:41	1900-01-03 05:59:04	125.401	76.3635	3.3394	20.4303
2011-09-21 14:03:42	1900-01-03 06:06:19	125.413	76.3699	3.3113	20.7294
2011-09-21 14:11:41	1900-01-03 06:13:34	125.425	76.3766	3.3161	20.9596
2011-09-21 14:19:42	1900-01-03 06:20:50	125.439	76.3816	3.3186	21.061
2011-09-21 14:27:41	1900-01-03 06:28:05	125.452	76.3874	3.3115	21.1623
2011-09-21 14:35:42	1900-01-03 06:35:20	125.464	76.3926	3.2973	21.3645
2011-09-21 14:43:42	1900-01-03 06:42:35	125.477	76.3993	3.2879	21.664
2011-09-21 14:51:41	1900-01-03 06:49:50	125.493	76.4056	3.2866	21.862
2011-09-21 14:59:42	1900-01-03 06:57:06	125.51	76.4116	3.2752	22.0266
2011-09-21 15:07:41	1900-01-03 07:04:21	125.527	76.4179	3.2624	22.3826
2011-09-21 15:15:42	1900-01-03 07:11:36	125.545	76.4241	3.2291	22.6499
2011-09-21 15:23:41	1900-01-03 07:18:51	125.562	76.43	3.2034	22.7228
2011-09-21 15:31:42	1900-01-03 07:26:06	125.58	76.4371	3.1965	22.7489
2011-09-21 15:39:41	1900-01-03 07:33:22	125.596	76.4427	3.2007	22.7088
2011-09-21 15:47:42	1900-01-03 07:40:37	125.614	76.449	3.1993	22.6681
2011-09-21 15:55:42	1900-01-03 07:47:52	125.632	76.4557	3.1949	22.632
2011-09-21 16:03:41	1900-01-03 07:55:07	125.651	76.4625	3.1963	22.077
2011-09-21 16:11:42	1900-01-03 08:02:23	125.669	76.4693	3.2202	21.3362
2011-09-21 16:19:41	1900-01-03 08:09:38	125.688	76.4753	3.2471	20.8873
2011-09-21 16:27:42	1900-01-03 08:16:53	125.706	76.4813	3.2619	20.6398
2011-09-21 16:35:41	1900-01-03 08:24:08	125.722	76.4865	3.2622	20.4921
2011-09-21 16:43:42	1900-01-03 08:31:23	125.74	76.4925	3.2533	20.4115
2011-09-21 16:51:41	1900-01-03 08:38:39	125.758	76.4985	3.2477	20.4021
2011-09-21 16:59:42	1900-01-03 08:45:54	125.777	76.5048	3.2326	20.4478
2011-09-21 17:07:42	1900-01-03 08:53:09	125.791	76.511	3.2262	20.4505
2011-09-21 17:15:41	1900-01-03 09:00:24	125.807	76.5174	3.2455	20.584
2011-09-21 17:23:42	1900-01-03 09:07:40	125.822	76.5227	3.2333	20.7602
2011-09-21 17:31:41	1900-01-03 09:14:55	125.838	76.5286	3.2498	20.7834
2011-09-21 17:39:42	1900-01-03 09:22:10	125.855	76.5342	3.2721	20.7064
2011-09-21 17:47:41	1900-01-03 09:29:25	125.871	76.5394	3.3043	20.5739
2011-09-21 17:55:42	1900-01-03 09:36:40	125.885	76.5443	3.3199	20.4289
2011-09-21 18:03:41	1900-01-03 09:43:56	125.9	76.5496	3.3286	20.2996
2011-09-21 18:11:42	1900-01-03 09:51:11	125.916	76.555	3.3448	20.1791
2011-09-21 18:19:42	1900-01-03 09:58:26	125.931	76.5607	3.3646	20.0804
2011-09-21 18:27:41	1900-01-03 10:05:41	125.948	76.5662	3.3761	20.0087
2011-09-21 18:35:42	1900-01-03 10:12:56	125.962	76.5718	3.3692	19.9408
2011-09-21 18:43:41	1900-01-03 10:20:12	125.979	76.5778	3.3261	19.901
2011-09-21 18:51:42	1900-01-03 10:27:27	125.995	76.5839	3.2929	19.8848
2011-09-21 18:59:41	1900-01-03 10:34:42	126.011	76.5893	3.2984	19.8651
2011-09-21 19:07:42	1900-01-03 10:41:57	126.028	76.595	3.3523	19.8286
2011-09-21 19:15:41	1900-01-03 10:49:13	126.043	76.6003	3.3812	19.7734
2011-09-21 19:23:42	1900-01-03 10:56:28	126.061	76.6058	3.4213	19.7427
2011-09-21 19:31:42	1900-01-03 11:03:43	126.078	76.6119	3.4782	19.74
2011-09-21 19:39:41	1900-01-03 11:10:58	126.096	76.6186	3.5002	19.7487
2011-09-21 19:47:42	1900-01-03 11:18:13	126.113	76.6249	3.5114	19.7514
2011-09-21 19:55:41	1900-01-03 11:25:29	126.132	76.6311	3.5057	19.7511
2011-09-21 20:03:42	1900-01-03 11:32:44	126.148	76.6365	3.4923	19.7472
2011-09-21 20:11:41	1900-01-03 11:39:59	126.163	76.6424	3.5042	19.7337
2011-09-21 20:19:42	1900-01-03 11:47:14	126.18	76.6492	3.4718	19.7421
2011-09-21 20:27:41	1900-01-03 11:54:30	126.199	76.6552	3.4246	19.7135
2011-09-21 20:35:42	1900-01-03 12:01:45	126.217	76.6614	3.4333	19.6538
2011-09-21 09:47:42	1900-01-03 12:09:00	126.236	76.6675	3.5075	19.6437
2011-09-21 09:47:42	1900-01-03 12:16:15	126.256	76.674	3.5504	19.6765
2011-09-21 09:47:42	1900-01-03 12:23:30	126.271	76.6792	3.5858	19.6754
2011-09-21 09:47:42	1900-01-03 12:30:46	126.29	76.6864	3.5737	19.8335
2011-09-21 09:47:42	1900-01-03 12:38:01	126.31	76.6934	3.5543	19.938
2011-09-21 09:47:42	1900-01-03 12:45:16	126.328	76.6992	3.5505	19.9616
2011-09-21 09:47:42	1900-01-03 12:52:31	126.346	76.7048	3.5539	20.0173
2011-09-21 09:47:42	1900-01-03 12:59:47	126.362	76.7108	3.5529	20.0815
2011-09-21 09:47:42	1900-01-03 13:07:02	126.379	76.7175	3.5596	20.1055
2011-09-21 09:47:42	1900-01-03 13:14:17	126.398	76.7243	3.5558	20.1174
2011-09-21 09:47:42	1900-01-03 13:21:32	126.417	76.7308	3.5562	20.1096
2011-09-21 09:47:42	1900-01-03 13:28:47	126.436	76.7376	3.5524	20.1117
2011-09-21 09:47:42	1900-01-03 13:36:03	126.456	76.7447	3.5474	20.1101
2011-09-21 09:47:42	1900-01-03 13:43:18	126.478	76.7522	3.5474	20.1077
2011-09-21 09:47:42	1900-01-03 13:50:33	126.498	76.7591	3.5381	20.1103
2011-09-21 09:47:42	1900-01-03 13:57:48	126.521	76.7667	3.5326	20.1132
2011-09-21 09:47:42	1900-01-03 14:05:04	126.544	76.774	3.5259	20.1212
2011-09-21 09:47:42	1900-01-03 14:12:19	126.565	76.7813	3.522	20.1337
2011-09-21 09:47:42	1900-01-03 14:19:34	126.58	76.7874	3.5211	20.144
2011-09-21 09:47:42	1900-01-03 14:26:49	126.597	76.7934	3.5197	20.1503
2011-09-21 09:47:42	1900-01-03 14:34:04	126.615	76.8002	3.5192	20.1572
2011-09-21 09:47:42	1900-01-03 14:41:20	126.634	76.8062	3.5155	20.1561
2011-09-21 09:47:42	1900-01-03 14:48:35	126.653	76.8126	3.5121	20.1544
2011-09-21 09:47:42	1900-01-03 14:55:50	126.672	76.8184	3.5097	20.152
2011-09-21 09:47:42	1900-01-03 15:03:05	126.688	76.8242	3.5062	20.1489
2011-09-21 09:47:42	1900-01-03 15:10:21	126.708	76.831	3.5052	20.1453
2011-09-21 09:47:42	1900-01-03 15:17:36	126.727	76.8375	3.5007	20.1423
2011-09-21 09:47:42	1900-01-03 15:24:51	126.747	76.8441	3.4986	20.1434
2011-09-21 09:47:42	1900-01-03 15:32:06	126.765	76.8505	3.4991	20.1377
2011-09-21 09:47:42	1900-01-03 15:39:21	126.785	76.8575	3.4957	20.1382
2011-09-21 09:47:42	1900-01-03 15:46:37	126.805	76.8644	3.4941	20.1348
2011-09-21 09:47:42	1900-01-03 15:53:52	126.826	76.8714	3.4927	20.1291
2011-09-21 09:47:42	1900-01-03 16:01:07	126.846	76.8782	3.4928	20.1249
2011-09-21 09:47:42	1900-01-03 16:08:22	126.862	76.8838	3.4979	20.1165
2011-09-21 09:47:42	1900-01-03 16:15:38	126.877	76.8889	3.5058	20.1098
2011-09-21 09:47:42	1900-01-03 16:22:53	126.893	76.8948	3.5176	20.1117
2011-09-21 09:47:42	1900-01-03 16:30:08	126.911	76.901	3.5313	20.112
2011-09-21 09:47:42	1900-01-03 16:37:23	126.927	76.9068	3.5329	20.1206
2011-09-21 09:47:42	1900-01-03 16:44:38	126.944	76.9122	3.532	20.131
2011-09-21 09:47:42	1900-01-03 16:51:54	126.962	76.9182	3.5348	20.1414
2011-09-21 09:47:42	1900-01-03 16:59:09	126.98	76.9245	3.5267	20.1562
2011-09-21 09:47:42	1900-01-03 17:06:24	126.998	76.9307	3.4639	20.1774
2011-09-21 09:47:42	1900-01-03 17:13:39	127.017	76.9377	3.3608	20.2112
2011-09-21 09:47:42	1900-01-03 17:20:55	127.037	76.9444	3.3124	20.3662
2011-09-21 09:47:42	1900-01-03 17:28:10	127.056	76.9506	3.3106	20.456
2011-09-21 09:47:42	1900-01-03 17:35:25	127.072	76.9556	3.3153	20.5191
2011-09-21 09:47:42	1900-01-03 17:42:40	127.086	76.9615	3.3253	20.5278
2011-09-21 09:47:42	1900-01-03 17:49:55	127.103	76.9666	3.3055	20.5272
2011-09-21 09:47:42	1900-01-03 17:57:11	127.122	76.9732	3.2951	20.5553
2011-09-21 09:47:42	1900-01-03 18:04:26	127.139	76.9789	3.2855	20.5165
2011-09-21 09:47:42	1900-01-03 18:11:41	127.154	76.9843	3.2743	20.4447
2011-09-21 09:47:42	1900-01-03 18:18:56	127.175	76.9915	3.2655	20.3706
2011-09-21 09:47:42	1900-01-03 18:26:12	127.198	76.9991	3.2499	20.326
2011-09-21 09:47:42	1900-01-03 18:33:27	127.218	77.0047	3.2391	20.2899
2011-09-21 09:47:42	1900-01-03 18:40:42	127.233	77.0108	3.2022	20.2851
2011-09-21 09:47:42	1900-01-03 18:47:57	127.249	77.0167	3.1574	20.2964
2011-09-21 09:47:42	1900-01-03 18:55:12	127.266	77.0218	3.3476	20.733
2011-09-21 09:47:42	1900-01-03 19:02:28	127.279	77.0262	3.4047	21.0916
2011-09-21 09:47:42	1900-01-03 19:09:43	127.282	77.0285	3.4709	21.4606
2011-09-21 09:47:42	1900-01-03 19:16:58	127.289	77.0302	3.4832	21.6649
2011-09-21 09:47:42	1900-01-03 19:24:13	127.288	77.0296	3.5007	21.7675
2011-09-21 09:47:42	1900-01-03 19:31:28	127.302	77.0289	3.5624	21.7812
2011-09-21 09:47:42	1900-01-03 19:38:44	127.308	77.0216	3.275	21.887
2011-09-21 09:47:42	1900-01-03 19:45:59	127.309	77.0104	3.2104	21.8369
2011-09-21 09:47:42	1900-01-03 19:53:14	127.309	77	3.2317	21.4563
2011-09-21 09:47:42	1900-01-03 20:00:29	127.309	76.9894	3.2606	20.7276
2011-09-21 09:47:42	1900-01-03 20:07:45	127.308	76.979	3.2702	20.4489
2011-09-21 09:47:42	1900-01-03 20:15:00	127.307	76.969	3.276	20.3649
2011-09-21 09:47:42	1900-01-03 20:22:15	127.306	76.9591	3.2813	20.3753
2011-09-21 09:47:42	1900-01-03 20:29:30	127.307	76.949	3.2835	20.3675
2011-09-21 09:47:42	1900-01-03 20:36:45	127.307	76.9388	3.2979	20.5834
2011-09-21 09:47:42	1900-01-03 20:44:01	127.308	76.9289	3.2564	20.7225
2011-09-21 09:47:42	1900-01-03 20:51:16	127.308	76.9191	3.2351	20.8734
2011-09-21 09:47:42	1900-01-03 20:58:31	127.307	76.9091	3.2676	20.9156
2011-09-21 09:47:42	1900-01-03 21:05:46	127.306	76.899	3.2747	20.9462
2011-09-21 09:47:42	1900-01-03 21:13:02	127.306	76.8888	3.2622	20.9861
2011-09-21 09:47:42	1900-01-03 21:20:17	127.306	76.8786	3.217	20.9642
2011-09-21 09:47:42	1900-01-03 21:27:32	127.308	76.8685	3.1888	20.9701
2011-09-21 09:47:42	1900-01-03 21:34:47	127.307	76.8585	3.1887	21.0362
2011-09-21 09:47:42	1900-01-03 21:42:02	127.307	76.8485	3.1945	21.0704
2011-09-21 09:47:42	1900-01-03 21:49:18	127.307	76.8383	3.1996	21.0513
2011-09-21 09:47:42	1900-01-03 21:56:33	127.308	76.8279	3.2079	21.0228
2011-09-21 09:47:42	1900-01-03 22:03:48	127.306	76.8176	3.253	20.9677
2011-09-21 09:47:42	1900-01-03 22:11:03	127.307	76.807	3.2972	20.8555
2011-09-21 09:47:42	1900-01-03 22:18:19	127.307	76.7966	3.3201	20.811
2011-09-21 09:47:42	1900-01-03 22:25:34	127.307	76.7863	3.3378	20.8215
2011-09-21 09:47:42	1900-01-03 22:32:49	127.308	76.776	3.3318	20.8226
2011-09-21 09:47:42	1900-01-03 22:40:04	127.308	76.7655	3.318	20.7885
2011-09-21 09:47:42	1900-01-03 22:47:19	127.308	76.7551	3.3509	20.626
2011-09-21 09:47:42	1900-01-03 22:54:35	127.308	76.7448	3.3805	20.4765
2011-09-21 09:47:42	1900-01-03 23:01:50	127.307	76.7347	3.4077	20.375
2011-09-21 09:47:42	1900-01-03 23:09:05	127.308	76.7248	3.6999	20.1834
2011-09-21 09:47:42	1900-01-03 23:16:20	127.308	76.7212	3.8735	20.0597
2011-09-21 09:47:42	1900-01-03 23:23:36	127.31	76.7204	3.9426	19.9825
2011-09-21 09:47:42	1900-01-03 23:30:51	127.312	76.7203	3.7219	20.0323
2011-09-21 09:47:42	1900-01-03 23:38:06	127.294	76.7193	3.6414	19.9883
2011-09-21 09:47:42	1900-01-03 23:45:21	127.241	76.7202	3.6108	19.9891
2011-09-21 09:47:42	1900-01-03 23:52:36	127.187	76.7201	3.455	20.0138
2011-09-21 09:47:42	1900-01-03 23:59:52	127.135	76.7201	3.2718	20.1497
2011-09-22 09:55:42	1900-01-04 00:07:07	127.081	76.7203	3.223	20.3811
2011-09-22 10:03:41	1900-01-04 00:14:22	127.026	76.7204	3.3448	20.3885
2011-09-22 10:11:42	1900-01-04 00:21:37	126.971	76.7206	3.4278	20.3203
2011-09-22 10:19:41	1900-01-04 00:28:53	126.917	76.7206	3.4173	20.2827
2011-09-22 10:27:42	1900-01-04 00:36:08	126.865	76.7206	3.3892	20.2828
2011-09-22 10:35:41	1900-01-04 00:43:23	126.813	76.7207	3.3686	20.2961
2011-09-22 10:43:42	1900-01-04 00:50:38	126.759	76.7207	3.4014	20.2818
2011-09-22 10:51:41	1900-01-04 00:57:53	126.704	76.7208	3.4099	20.2031
2011-09-22 10:59:42	1900-01-04 01:05:09	126.649	76.7207	3.4099	20.1635
2011-09-22 11:07:42	1900-01-04 01:12:24	126.593	76.721	3.4173	20.1308
2011-09-22 11:15:41	1900-01-04 01:19:39	126.537	76.7208	3.4267	20.1217
2011-09-22 11:23:42	1900-01-04 01:26:54	126.482	76.7206	3.4227	20.1447
2011-09-22 11:31:41	1900-01-04 01:34:10	126.431	76.7208	3.423	20.2
2011-09-22 11:39:42	1900-01-04 01:41:25	126.39	76.7208	3.4238	20.1845
2011-09-22 11:47:41	1900-01-04 01:48:40	126.383	76.7169	3.6351	19.9773
2011-09-22 11:55:42	1900-01-04 01:55:55	126.403	76.7193	3.7037	19.8917
2011-09-22 12:03:41	1900-01-04 02:03:10	126.398	76.7205	3.7598	19.7779
2011-09-22 12:11:42	1900-01-04 02:10:26	126.404	76.7199	3.8455	19.7808
2011-09-22 12:19:42	1900-01-04 02:17:41	126.42	76.7173	3.6008	19.8708
2011-09-22 12:27:41	1900-01-04 02:24:56	126.419	76.706	3.5026	19.8333
2011-09-22 12:35:42	1900-01-04 02:32:11	126.419	76.6948	3.4634	19.7779
2011-09-22 12:43:41	1900-01-04 02:39:27	126.419	76.6822	3.4212	19.709
2011-09-22 12:51:42	1900-01-04 02:46:42	126.42	76.6697	3.4035	19.6634
2011-09-22 12:59:41	1900-01-04 02:53:57	126.419	76.6574	3.384	19.6451
2011-09-22 13:07:42	1900-01-04 03:01:12	126.419	76.6452	3.3827	19.6456
2011-09-22 13:15:41	1900-01-04 03:08:27	126.42	76.6332	3.4082	19.6645
2011-09-22 13:23:42	1900-01-04 03:15:43	126.42	76.6217	3.3714	19.7329
2011-09-22 13:31:42	1900-01-04 03:22:58	126.421	76.61	3.3084	19.7413
2011-09-22 13:39:41	1900-01-04 03:30:13	126.42	76.5985	3.3018	19.6888
2011-09-22 13:47:42	1900-01-04 03:37:28	126.419	76.5874	3.2913	19.6535
2011-09-22 13:55:41	1900-01-04 03:44:44	126.419	76.5763	3.2828	19.6401
2011-09-22 14:03:42	1900-01-04 03:51:59	126.419	76.5652	3.2717	19.6493
2011-09-22 14:11:41	1900-01-04 03:59:14	126.419	76.5537	3.2764	19.6552
2011-09-22 14:19:42	1900-01-04 04:06:29	126.42	76.5422	3.2726	19.6795
2011-09-22 14:27:41	1900-01-04 04:13:44	126.42	76.5307	3.2697	19.7115
2011-09-22 14:35:42	1900-01-04 04:21:00	126.421	76.5191	3.2359	19.7538
2011-09-22 14:43:42	1900-01-04 04:28:15	126.42	76.5074	3.1831	19.72
2011-09-22 14:51:41	1900-01-04 04:35:30	126.42	76.4957	3.1613	19.7988
2011-09-22 14:59:42	1900-01-04 04:42:45	126.42	76.4838	3.1275	19.8525
2011-09-22 15:07:41	1900-01-04 04:50:00	126.419	76.4717	3.0875	19.8866
2011-09-22 15:15:42	1900-01-04 04:57:16	126.419	76.4592	3.0481	19.9229
2011-09-22 15:23:41	1900-01-04 05:04:31	126.42	76.4469	3.0752	19.9451
2011-09-22 15:31:42	1900-01-04 05:11:46	126.418	76.4347	3.0789	20.0202
2011-09-22 15:39:41	1900-01-04 05:19:01	126.419	76.4225	3.1351	20.0151
2011-09-22 15:47:42	1900-01-04 05:26:17	126.42	76.4105	3.167	19.9286
2011-09-22 15:55:42	1900-01-04 05:33:32	126.42	76.3989	3.1541	19.8933
2011-09-22 16:03:41	1900-01-04 05:40:47	126.421	76.393	3.1532	19.8222
2011-09-22 16:11:42	1900-01-04 05:48:02	126.429	76.3925	3.2003	19.3107
2011-09-22 16:19:41	1900-01-04 05:55:17	126.437	76.3921	3.1826	19.0204
2011-09-22 16:27:42	1900-01-04 06:02:33	126.415	76.3892	3.2455	18.96
2011-09-22 16:35:41	1900-01-04 06:09:48	126.367	76.3894	3.2871	18.7108
2011-09-22 16:43:42	1900-01-04 06:17:03	126.315	76.3899	3.31	18.5683
2011-09-22 16:51:41	1900-01-04 06:24:18	126.262	76.3906	3.3389	18.5068
2011-09-22 16:59:42	1900-01-04 06:31:33	126.208	76.3914	3.3428	18.4725
2011-09-22 17:07:42	1900-01-04 06:38:49	126.153	76.3923	3.3551	18.4416
2011-09-22 17:15:41	1900-01-04 06:46:04	126.1	76.3928	3.3235	18.4119
2011-09-22 17:23:42	1900-01-04 06:53:19	126.049	76.3929	3.2296	18.4064
2011-09-22 17:31:41	1900-01-04 07:00:34	125.997	76.3933	3.1337	18.4034
2011-09-22 17:39:42	1900-01-04 07:07:50	125.947	76.3939	3.0442	18.4791
2011-09-22 17:47:41	1900-01-04 07:15:05	125.899	76.3943	3.0135	19.3641
2011-09-22 17:55:42	1900-01-04 07:22:20	125.852	76.3948	3.0295	20.0182
2011-09-22 18:03:41	1900-01-04 07:29:35	125.803	76.395	2.9814	20.5587
2011-09-22 18:11:42	1900-01-04 07:36:50	125.753	76.3954	2.9321	21.0297
2011-09-22 18:19:42	1900-01-04 07:44:06	125.703	76.3959	2.919	21.038
2011-09-22 18:27:41	1900-01-04 07:51:21	125.653	76.3964	2.93	20.9198
2011-09-22 18:35:42	1900-01-04 07:58:36	125.602	76.397	2.9341	20.6542
2011-09-22 18:43:41	1900-01-04 08:05:51	125.55	76.3977	2.933	20.4735
2011-09-22 18:51:42	1900-01-04 08:13:07	125.516	76.3977	2.9272	20.4495
2011-09-22 18:59:41	1900-01-04 08:20:22	125.483	76.3979	2.957	20.4602
2011-09-22 19:07:42	1900-01-04 08:27:37	125.45	76.3982	2.9741	20.447
2011-09-22 19:15:41	1900-01-04 08:34:52	125.399	76.3984	2.9804	20.531
2011-09-22 19:23:42	1900-01-04 08:42:07	125.347	76.3984	2.9658	20.6061
2011-09-22 19:31:42	1900-01-04 08:49:23	125.299	76.3985	3.0284	20.6055
2011-09-22 19:39:41	1900-01-04 08:56:38	125.252	76.3986	3.0991	20.7008
2011-09-22 19:47:42	1900-01-04 09:03:53	125.205	76.3984	3.1307	20.7712
2011-09-22 19:55:41	1900-01-04 09:11:08	125.157	76.3984	3.1481	20.5741
2011-09-22 20:03:42	1900-01-04 09:18:24	125.109	76.3989	3.1311	20.2771
2011-09-22 20:11:41	1900-01-04 09:25:39	125.065	76.3991	3.1276	19.9135
2011-09-22 20:19:42	1900-01-04 09:32:54	125.05	76.3984	3.1263	19.7238
2011-09-22 20:27:41	1900-01-04 09:40:09	125.054	76.3973	3.1065	19.6495
2011-09-22 20:35:42	1900-01-04 09:47:24	125.054	76.3962	3.1009	19.6248
2011-09-22 20:43:42	1900-01-04 09:54:40	125.05	76.4045	3.0999	19.6243
2011-09-22 20:51:41	1900-01-04 10:01:55	125.05	76.4159	3.0961	19.605
2011-09-22 20:59:42	1900-01-04 10:09:10	125.05	76.4281	3.0809	19.6049
2011-09-22 21:07:41	1900-01-04 10:16:25	125.051	76.4401	3.1003	19.6036
2011-09-22 21:15:42	1900-01-04 10:23:40	125.05	76.4524	3.0963	20.004
2011-09-22 21:23:41	1900-01-04 10:30:56	125.05	76.4641	3.0461	20.4089
2011-09-22 21:31:42	1900-01-04 10:38:11	125.049	76.4767	3.0342	21.1693
2011-09-22 21:39:41	1900-01-04 10:45:26	125.049	76.4892	3.0174	21.4316
2011-09-22 21:47:42	1900-01-04 10:52:41	125.05	76.5015	3.0284	21.4737
2011-09-22 21:55:42	1900-01-04 10:59:57	125.05	76.5135	3.0175	21.5163
2011-09-22 22:03:41	1900-01-04 11:07:12	125.051	76.5259	3.0109	21.5239
2011-09-22 22:11:42	1900-01-04 11:14:27	125.051	76.538	2.9823	21.5724
2011-09-22 22:19:41	1900-01-04 11:21:42	125.051	76.5498	2.9881	21.6518
2011-09-22 22:27:42	1900-01-04 11:28:57	125.051	76.5616	3.0381	21.6753
2011-09-22 22:35:41	1900-01-04 11:36:13	125.051	76.5734	3.0482	21.7152
2011-09-22 22:43:42	1900-01-04 11:43:28	125.051	76.5857	3.0412	21.6899
2011-09-22 12:15:57	1900-01-04 11:50:43	125.05	76.5982	3.0454	21.5488
2011-09-22 12:15:57	1900-01-04 11:57:58	125.051	76.6111	3.0643	21.4079
2011-09-22 12:15:57	1900-01-04 12:05:14	125.051	76.6238	3.0473	21.3338
2011-09-22 12:15:57	1900-01-04 12:12:29	125.05	76.6364	3.0397	21.1854
2011-09-22 12:15:57	1900-01-04 12:19:44	125.05	76.6476	3.0244	21.0621
2011-09-22 12:15:57	1900-01-04 12:26:59	125.049	76.6479	2.9948	21.0088
2011-09-22 12:15:57	1900-01-04 12:34:14	125.054	76.6476	2.9865	20.9761
2011-09-22 12:15:57	1900-01-04 12:41:30	125.054	76.647	2.9869	20.9667
2011-09-22 12:15:57	1900-01-04 12:48:45	125.049	76.6544	2.988	20.9833
2011-09-22 12:15:57	1900-01-04 12:56:00	125.049	76.6669	2.9754	20.9856
2011-09-22 12:15:57	1900-01-04 13:03:15	125.049	76.6782	2.9682	20.9745
2011-09-22 12:15:57	1900-01-04 13:10:31	125.049	76.6894	2.9746	20.9938
2011-09-22 12:15:57	1900-01-04 13:17:46	125.049	76.7004	2.9877	21.0369
2011-09-22 12:15:57	1900-01-04 13:25:01	125.049	76.7116	3.0106	21.0642
2011-09-22 12:15:57	1900-01-04 13:32:16	125.049	76.7221	3.0106	21.1186
2011-09-22 12:15:57	1900-01-04 13:39:31	125.048	76.733	2.9971	21.0882
2011-09-22 12:15:57	1900-01-04 13:46:47	125.047	76.7437	2.9736	21.0748
2011-09-22 12:15:57	1900-01-04 13:54:02	125.045	76.7549	2.9458	21.1973
2011-09-22 12:15:57	1900-01-04 14:01:17	125.045	76.7642	2.9535	21.2184
2011-09-22 12:15:57	1900-01-04 14:08:32	125.044	76.7725	2.9625	21.2658
2011-09-22 12:15:57	1900-01-04 14:15:48	125.044	76.7819	2.974	21.2638
2011-09-22 12:15:57	1900-01-04 14:23:03	125.045	76.7914	2.9815	21.2748
2011-09-22 12:15:57	1900-01-04 14:30:18	125.044	76.8017	2.993	21.281
2011-09-22 12:15:57	1900-01-04 14:37:33	125.042	76.8114	2.9569	21.3445
2011-09-22 12:15:57	1900-01-04 14:44:48	125.042	76.8213	2.9325	21.6653
2011-09-22 12:15:57	1900-01-04 14:52:04	125.042	76.8311	2.9298	21.9705
2011-09-22 12:15:57	1900-01-04 14:59:19	125.042	76.8405	2.9911	22.7878
2011-09-22 12:15:57	1900-01-04 15:06:34	125.041	76.8502	3.0156	23.477
2011-09-22 12:15:57	1900-01-04 15:13:49	125.042	76.8617	2.994	23.6413
2011-09-22 12:15:57	1900-01-04 15:21:05	125.038	76.8708	2.9817	23.6785
2011-09-22 12:15:57	1900-01-04 15:28:20	125.04	76.8625	2.9809	23.6774
2011-09-22 12:15:57	1900-01-04 15:35:35	125.048	76.86	3.193	23.6667
2011-09-22 12:15:57	1900-01-04 15:42:50	125.046	76.8582	3.285	23.7237
2011-09-22 12:15:57	1900-01-04 15:50:05	125.046	76.8564	3.095	23.8367
2011-09-22 12:15:57	1900-01-04 15:57:21	125.047	76.8547	3.0599	23.7905
2011-09-22 12:15:57	1900-01-04 16:04:36	125.046	76.853	3.0527	23.7469
2011-09-22 12:15:57	1900-01-04 16:11:51	125.031	76.8549	3.0475	23.8112
2011-09-22 12:15:57	1900-01-04 16:19:06	125.037	76.8635	3.0449	23.8177
2011-09-22 12:15:57	1900-01-04 16:26:22	125.039	76.8718	3.0272	23.8235
2011-09-22 12:15:57	1900-01-04 16:33:37	125.041	76.8794	3.007	23.9306
2011-09-22 12:15:57	1900-01-04 16:40:52	125.042	76.8876	3.0024	23.9181
2011-09-22 12:15:57	1900-01-04 16:48:07	125.042	76.8967	3.0014	23.9423
2011-09-22 12:15:57	1900-01-04 16:55:22	125.042	76.9043	2.9828	23.9919
2011-09-22 12:15:57	1900-01-04 17:02:38	125.043	76.9121	2.9739	24.0095
2011-09-22 12:15:57	1900-01-04 17:09:53	125.044	76.9202	2.9729	24.0203
2011-09-22 12:15:57	1900-01-04 17:17:08	125.044	76.9283	2.9749	24.0255
2011-09-22 12:15:57	1900-01-04 17:24:23	125.043	76.9349	2.9794	24.0918
2011-09-22 12:15:57	1900-01-04 17:31:39	125.044	76.9408	2.9845	24.1494
2011-09-22 12:15:57	1900-01-04 17:38:54	125.043	76.9473	2.9754	24.2225
2011-09-22 12:15:57	1900-01-04 17:46:09	125.043	76.9547	2.9508	24.3033
2011-09-22 12:15:57	1900-01-04 17:53:24	125.043	76.9627	2.9402	24.3239
2011-09-22 12:15:57	1900-01-04 18:00:39	125.043	76.9717	2.9453	24.3346
2011-09-22 12:15:57	1900-01-04 18:07:55	125.044	76.9805	2.9401	24.3865
2011-09-22 12:15:57	1900-01-04 18:15:10	125.045	76.9899	2.9562	24.4217
2011-09-22 12:15:57	1900-01-04 18:22:25	125.047	76.9983	2.995	24.4431
2011-09-22 12:15:57	1900-01-04 18:29:40	125.047	77.0053	3.0309	24.4821
2011-09-22 12:15:57	1900-01-04 18:36:56	125.046	77.0131	3.0438	24.5082
2011-09-22 12:15:57	1900-01-04 18:44:11	125.046	77.0201	3.0383	24.5244
2011-09-22 12:15:57	1900-01-04 18:51:26	125.045	77.0292	3.06	24.511
2011-09-22 12:15:57	1900-01-04 18:58:41	125.044	77.0375	3.2301	24.7517
2011-09-22 12:15:57	1900-01-04 19:05:56	125.046	77.0461	3.4116	25.8995
2011-09-22 12:15:57	1900-01-04 19:13:12	125.048	77.0551	3.4271	26.5833
2011-09-22 12:15:57	1900-01-04 19:20:27	125.051	77.0644	3.4152	26.7274
2011-09-22 12:15:57	1900-01-04 19:27:42	125.048	77.0733	3.3932	26.8178
2011-09-22 12:15:57	1900-01-04 19:34:57	125.05	77.081	3.3839	26.8438
2011-09-22 12:15:57	1900-01-04 19:42:13	125.05	77.0889	3.3723	26.8528
2011-09-22 12:15:57	1900-01-04 19:49:28	125.039	77.0936	3.352	26.9168
2011-09-22 12:15:57	1900-01-04 19:56:43	125.045	77.082	3.3594	26.923
2011-09-22 12:15:57	1900-01-04 20:03:58	125.047	77.0713	3.3616	26.9892
2011-09-22 12:15:57	1900-01-04 20:11:13	125.049	77.0604	3.3667	27.0164
2011-09-22 12:15:57	1900-01-04 20:18:29	125.047	77.0494	3.3993	27.0456
2011-09-22 12:15:57	1900-01-04 20:25:44	125.019	77.0387	3.4147	27.0693
2011-09-22 12:15:57	1900-01-04 20:32:59	124.996	77.0302	3.3901	27.0954
2011-09-22 12:15:57	1900-01-04 20:40:14	124.977	77.0212	3.177	26.3309
2011-09-22 12:15:57	1900-01-04 20:47:30	124.956	77.0123	3.0626	25.2454
2011-09-22 12:15:57	1900-01-04 20:54:45	124.935	77.0053	3.0447	24.9169
2011-09-22 12:15:57	1900-01-04 21:02:00	124.935	77.0038	3.0218	24.8702
2011-09-22 12:15:57	1900-01-04 21:09:15	124.938	77.0027	3.006	24.8306
2011-09-22 12:15:57	1900-01-04 21:16:30	124.94	77.0018	2.991	24.8106
2011-09-22 12:15:57	1900-01-04 21:23:46	124.933	76.996	2.9803	24.7979
2011-09-22 12:15:57	1900-01-04 21:31:01	124.944	76.9857	2.9572	24.7621
2011-09-22 12:15:57	1900-01-04 21:38:16	124.898	76.9792	2.9343	24.743
2011-09-22 12:15:57	1900-01-04 21:45:31	124.852	76.9722	2.899	24.7182
2011-09-22 12:15:57	1900-01-04 21:52:47	124.807	76.9657	2.8727	24.6376
2011-09-22 12:15:57	1900-01-04 22:00:02	124.766	76.9603	2.8849	24.5982
2011-09-22 12:15:57	1900-01-04 22:07:17	124.759	76.9596	2.9077	24.62
2011-09-22 12:15:57	1900-01-04 22:14:32	124.76	76.959	2.9103	24.6178
2011-09-22 12:15:57	1900-01-04 22:21:47	124.749	76.9571	2.9117	24.6348
2011-09-22 12:15:57	1900-01-04 22:29:03	124.704	76.9508	2.9002	24.7245
2011-09-22 12:15:57	1900-01-04 22:36:18	124.657	76.9438	2.8871	24.7561
2011-09-22 12:15:57	1900-01-04 22:43:33	124.61	76.9368	2.8978	24.7604
2011-09-22 12:15:57	1900-01-04 22:50:48	124.566	76.93	2.9631	24.8514
2011-09-22 12:15:57	1900-01-04 22:58:04	124.518	76.9229	2.9496	25.0308
2011-09-22 12:15:57	1900-01-04 23:05:19	124.47	76.916	2.9363	25.1786
2011-09-22 12:15:57	1900-01-04 23:12:34	124.426	76.9096	2.9271	25.4354
2011-09-22 12:15:57	1900-01-04 23:19:49	124.381	76.903	2.9309	25.673
2011-09-22 12:15:57	1900-01-04 23:27:05	124.336	76.8965	2.9419	25.9169
2011-09-22 12:15:57	1900-01-04 23:34:20	124.291	76.8899	2.9787	26.1954
2011-09-22 12:15:57	1900-01-04 23:41:35	124.246	76.8831	3.0204	26.5525
2011-09-22 12:15:57	1900-01-04 23:48:50	124.2	76.8768	3.041	26.8296
2011-09-22 12:15:57	1900-01-04 23:56:05	124.155	76.8703	3.0639	27.049
2011-09-23 12:19:42	1900-01-05 00:03:21	124.134	76.867	3.1218	27.4164
2011-09-23 12:27:41	1900-01-05 00:10:36	124.134	76.8646	3.1672	27.7285
2011-09-23 12:35:42	1900-01-05 00:17:51	124.135	76.8622	3.1885	27.8594
2011-09-23 12:43:41	1900-01-05 00:25:06	124.135	76.8597	3.2127	27.888
2011-09-23 12:51:42	1900-01-05 00:32:22	124.132	76.8599	3.2497	27.9384
2011-09-23 12:59:41	1900-01-05 00:39:37	124.179	76.859	3.258	27.9419
2011-09-23 13:07:42	1900-01-05 00:46:52	124.231	76.8588	3.2639	27.9716
2011-09-23 13:15:41	1900-01-05 00:54:07	124.286	76.8584	3.2083	27.9552
2011-09-23 13:23:42	1900-01-05 01:01:22	124.343	76.8585	3.2036	28.0059
2011-09-23 13:31:42	1900-01-05 01:08:38	124.396	76.8585	3.1025	28.0647
2011-09-23 13:39:41	1900-01-05 01:15:53	124.448	76.8585	2.9735	27.4459
2011-09-23 13:47:42	1900-01-05 01:23:08	124.5	76.8584	2.9045	26.6806
2011-09-23 13:55:41	1900-01-05 01:30:23	124.553	76.8581	2.8606	25.7966
2011-09-23 14:03:42	1900-01-05 01:37:38	124.605	76.8578	2.8473	25.2226
2011-09-23 14:11:41	1900-01-05 01:44:54	124.657	76.8572	2.7777	24.4719
2011-09-23 14:19:42	1900-01-05 01:52:09	124.709	76.8566	2.7795	23.5421
2011-09-23 14:27:41	1900-01-05 01:59:24	124.762	76.8559	2.7837	22.7955
2011-09-23 14:35:42	1900-01-05 02:06:39	124.815	76.8552	2.7888	22.3716
2011-09-23 14:43:42	1900-01-05 02:13:55	124.868	76.855	2.8245	22.2276
2011-09-23 14:51:41	1900-01-05 02:21:10	124.921	76.8549	2.8724	22.2184
2011-09-23 14:59:42	1900-01-05 02:28:25	124.971	76.8561	2.8853	22.608
2011-09-23 15:07:41	1900-01-05 02:35:40	125.02	76.8573	2.811	22.9908
2011-09-23 15:15:42	1900-01-05 02:42:55	125.053	76.8582	2.8862	23.0382
2011-09-23 15:23:41	1900-01-05 02:50:11	125.037	76.8526	3.0998	22.9246
2011-09-23 15:31:42	1900-01-05 02:57:26	125.043	76.8542	3.1736	22.8109
2011-09-23 15:39:41	1900-01-05 03:04:41	125.041	76.8577	3.2141	22.5009
2011-09-23 15:47:42	1900-01-05 03:11:56	125.041	76.8587	3.244	22.5363
2011-09-23 15:55:42	1900-01-05 03:19:12	125.047	76.8593	3.3059	22.5147
2011-09-23 16:03:41	1900-01-05 03:26:27	125.047	76.8586	3.3477	22.5312
2011-09-23 16:11:42	1900-01-05 03:33:42	125.049	76.8605	3.3845	22.5261
2011-09-23 16:19:41	1900-01-05 03:40:57	125.048	76.8597	3.3851	22.5176
2011-09-23 16:27:42	1900-01-05 03:48:12	125.047	76.8586	3.4335	22.5201
2011-09-23 16:35:41	1900-01-05 03:55:28	125.046	76.8578	3.3843	22.5211
2011-09-23 16:43:42	1900-01-05 04:02:43	125.04	76.8593	3.0967	22.6034
2011-09-23 16:51:41	1900-01-05 04:09:58	125.084	76.8643	3.0389	22.5173
2011-09-23 16:59:42	1900-01-05 04:17:13	125.133	76.8697	3.0119	22.5123
2011-09-23 17:07:42	1900-01-05 04:24:29	125.179	76.8757	2.9704	22.4149
2011-09-23 17:15:41	1900-01-05 04:31:44	125.226	76.8818	2.9701	22.3597
2011-09-23 17:23:42	1900-01-05 04:38:59	125.275	76.8879	2.9746	22.3098
2011-09-23 17:31:41	1900-01-05 04:46:14	125.323	76.894	2.982	22.3067
2011-09-23 17:39:42	1900-01-05 04:53:29	125.37	76.9002	3.0024	22.3058
2011-09-23 17:47:41	1900-01-05 05:00:45	125.416	76.9065	3.0035	22.6065
2011-09-23 17:55:42	1900-01-05 05:08:00	125.461	76.9127	2.9891	22.8951
2011-09-23 18:03:41	1900-01-05 05:15:15	125.506	76.9186	2.9536	23.1672
2011-09-23 18:11:42	1900-01-05 05:22:30	125.551	76.9244	2.9908	23.6091
2011-09-23 18:19:42	1900-01-05 05:29:46	125.596	76.9301	3.1123	24.4389
2011-09-23 18:27:41	1900-01-05 05:37:01	125.641	76.9364	3.2016	25.331
2011-09-23 18:35:42	1900-01-05 05:44:16	125.684	76.942	3.0883	25.8739
2011-09-23 18:43:41	1900-01-05 05:51:31	125.73	76.9481	3.056	26.1681
2011-09-23 18:51:42	1900-01-05 05:58:46	125.776	76.9541	3.1005	26.1971
2011-09-23 18:59:41	1900-01-05 06:06:02	125.822	76.9598	3.3323	26.7586
2011-09-23 19:07:42	1900-01-05 06:13:17	125.867	76.9657	3.4223	27.153
2011-09-23 19:15:41	1900-01-05 06:20:32	125.913	76.9715	3.4568	27.3615
2011-09-23 19:23:42	1900-01-05 06:27:47	125.958	76.977	3.4439	27.4407
2011-09-23 19:31:42	1900-01-05 06:35:03	126	76.9826	3.4324	27.4777
2011-09-23 19:39:41	1900-01-05 06:42:18	126.046	76.9883	3.4	27.542
2011-09-23 19:47:42	1900-01-05 06:49:33	126.092	76.9938	3.3867	27.5645
2011-09-23 19:55:41	1900-01-05 06:56:48	126.134	76.9993	3.3664	27.5399
2011-09-23 20:03:42	1900-01-05 07:04:03	126.175	77.0056	3.0003	27.5976
2011-09-23 20:11:41	1900-01-05 07:11:19	126.216	77.0119	2.7315	27.2477
2011-09-23 20:19:42	1900-01-05 07:18:34	126.254	77.0179	2.6426	26.6565
2011-09-23 20:27:41	1900-01-05 07:25:49	126.291	77.0235	2.6181	25.9725
2011-09-23 20:35:42	1900-01-05 07:33:04	126.33	77.0293	2.6289	25.3672
2011-09-23 20:43:42	1900-01-05 07:40:20	126.372	77.0353	2.667	24.8328
2011-09-23 20:51:41	1900-01-05 07:47:35	126.415	77.0416	2.6964	24.3589
2011-09-23 20:59:42	1900-01-05 07:54:50	126.458	77.048	2.6763	23.8702
2011-09-23 21:07:41	1900-01-05 08:02:05	126.47	77.0573	2.6354	23.4031
2011-09-23 21:15:42	1900-01-05 08:09:20	126.469	77.0685	2.608	22.9619
2011-09-23 21:23:41	1900-01-05 08:16:36	126.468	77.0793	2.6064	22.6876
2011-09-23 21:31:42	1900-01-05 08:23:51	126.461	77.0837	2.6158	22.5535
2011-09-23 21:39:41	1900-01-05 08:31:06	126.459	77.0827	2.5925	22.4695
2011-09-23 21:47:42	1900-01-05 08:38:21	126.459	77.0817	2.6162	22.4533
2011-09-23 21:55:42	1900-01-05 08:45:37	126.459	77.0806	2.6505	22.47
2011-09-23 22:03:41	1900-01-05 08:52:52	126.459	77.0797	2.6363	22.7768
2011-09-23 22:11:42	1900-01-05 09:00:07	126.442	77.0819	2.665	22.8094
2011-09-23 22:19:41	1900-01-05 09:07:22	126.404	77.0902	2.584	22.857
2011-09-23 22:27:42	1900-01-05 09:14:37	126.371	77.0993	2.5165	22.6181
2011-09-23 22:35:41	1900-01-05 09:21:53	126.371	77.1092	2.5107	22.6366
2011-09-23 22:43:42	1900-01-05 09:29:08	126.371	77.1212	2.576	23.1038
2011-09-23 14:43:57	1900-01-05 09:36:23	126.372	77.134	2.5664	23.4097
2011-09-23 14:43:57	1900-01-05 09:43:38	126.371	77.143	2.542	23.571
2011-09-23 14:43:57	1900-01-05 09:50:54	126.369	77.1428	2.519	23.6873
2011-09-23 14:43:57	1900-01-05 09:58:09	126.369	77.1424	2.5145	23.7538
2011-09-23 14:43:57	1900-01-05 10:05:24	126.37	77.1421	2.4979	23.7916
2011-09-23 14:43:57	1900-01-05 10:12:39	126.37	77.1416	2.5019	23.8382
2011-09-23 14:43:57	1900-01-05 10:19:54	126.369	77.141	2.4906	23.9085
2011-09-23 14:43:57	1900-01-05 10:27:10	126.367	77.1403	2.4908	23.9287
2011-09-23 14:43:57	1900-01-05 10:34:25	126.361	77.1392	2.4926	23.9225
2011-09-23 14:43:57	1900-01-05 10:41:40	126.359	77.1402	2.4883	23.9581
2011-09-23 14:43:57	1900-01-05 10:48:55	126.402	77.1357	2.5133	23.9308
2011-09-23 14:43:57	1900-01-05 10:56:10	126.449	77.1314	2.5284	23.9458
2011-09-23 14:43:57	1900-01-05 11:03:26	126.476	77.1223	2.4733	23.4564
2011-09-23 14:43:57	1900-01-05 11:10:41	126.5	77.112	2.4366	22.6556
2011-09-23 14:43:57	1900-01-05 11:17:56	126.526	77.1019	2.4536	22.165
2011-09-23 14:43:57	1900-01-05 11:25:11	126.551	77.0921	2.5105	21.8245
2011-09-23 14:43:57	1900-01-05 11:32:27	126.577	77.0824	2.5633	21.556
2011-09-23 14:43:57	1900-01-05 11:39:42	126.602	77.0728	2.5724	21.3978
2011-09-23 14:43:57	1900-01-05 11:46:57	126.627	77.0634	2.5898	21.3158
2011-09-23 14:43:57	1900-01-05 11:54:12	126.652	77.0538	2.6029	21.2512
2011-09-23 14:43:57	1900-01-05 12:01:27	126.677	77.0444	2.5958	21.1707
2011-09-23 14:43:57	1900-01-05 12:08:43	126.7	77.0353	2.6093	20.9913
2011-09-23 14:43:57	1900-01-05 12:15:58	126.725	77.0264	2.5991	20.9676
2011-09-23 14:43:57	1900-01-05 12:23:13	126.749	77.0174	2.5765	21.0014
2011-09-23 14:43:57	1900-01-05 12:30:28	126.774	77.0082	2.5314	21.157
2011-09-23 14:43:57	1900-01-05 12:37:44	126.799	76.9989	2.5637	21.4968
2011-09-23 14:43:57	1900-01-05 12:44:59	126.824	76.9894	2.4386	21.966
2011-09-23 14:43:57	1900-01-05 12:52:14	126.85	76.9795	2.2845	22.0397
2011-09-23 14:43:57	1900-01-05 12:59:29	126.876	76.9693	2.2187	22.1834
2011-09-23 14:43:57	1900-01-05 13:06:44	126.901	76.9594	2.2724	22.322
2011-09-23 14:43:57	1900-01-05 13:14:00	126.926	76.9496	2.3183	22.305
2011-09-23 14:43:57	1900-01-05 13:21:15	126.95	76.9402	2.3745	21.9097
2011-09-23 14:43:57	1900-01-05 13:28:30	126.972	76.9311	2.4362	21.335
2011-09-23 14:43:57	1900-01-05 13:35:45	126.995	76.9255	2.5607	20.8575
2011-09-23 14:43:57	1900-01-05 13:43:01	127.017	76.9217	2.6439	20.5137
2011-09-23 14:43:57	1900-01-05 13:50:16	127.039	76.9177	2.6888	20.2518
2011-09-23 14:43:57	1900-01-05 13:57:31	127.073	76.9162	2.7381	20.0803
2011-09-23 14:43:57	1900-01-05 14:04:46	127.113	76.9163	2.8471	19.9817
2011-09-23 14:43:57	1900-01-05 14:12:01	127.151	76.9162	2.9237	19.9915
2011-09-23 14:43:57	1900-01-05 14:19:17	127.189	76.9155	2.9198	20.0401
2011-09-23 14:43:57	1900-01-05 14:26:32	127.227	76.9147	2.9487	20.1142
2011-09-23 14:43:57	1900-01-05 14:33:47	127.265	76.9139	2.9341	20.1552
2011-09-23 14:43:57	1900-01-05 14:41:02	127.302	76.9129	2.9433	20.1587
2011-09-23 14:43:57	1900-01-05 14:48:17	127.341	76.9118	2.952	20.1842
2011-09-23 14:43:57	1900-01-05 14:55:33	127.383	76.9105	2.9957	20.125
2011-09-23 14:43:57	1900-01-05 15:02:48	127.424	76.9089	2.9855	20.2229
2011-09-23 14:43:57	1900-01-05 15:10:03	127.465	76.9074	2.9396	20.4134
2011-09-23 14:43:57	1900-01-05 15:17:18	127.506	76.9057	2.9273	20.4745
2011-09-23 14:43:57	1900-01-05 15:24:34	127.546	76.9038	2.9124	20.5066
2011-09-23 14:43:57	1900-01-05 15:31:49	127.587	76.9021	2.912	20.541
2011-09-23 14:43:57	1900-01-05 15:39:04	127.626	76.9008	2.923	20.5254
2011-09-23 14:43:57	1900-01-05 15:46:19	127.665	76.8995	2.9284	20.6093
2011-09-23 14:43:57	1900-01-05 15:53:34	127.707	76.8979	2.927	20.4641
2011-09-23 14:43:57	1900-01-05 16:00:50	127.75	76.896	2.9623	20.1903
2011-09-23 14:43:57	1900-01-05 16:08:05	127.792	76.8939	3.0381	19.9943
2011-09-23 14:43:57	1900-01-05 16:15:20	127.832	76.8922	3.1043	19.8925
2011-09-23 14:43:57	1900-01-05 16:22:35	127.872	76.8905	3.1463	19.8535
2011-09-23 14:43:57	1900-01-05 16:29:50	127.914	76.8889	3.2098	19.8568
2011-09-23 14:43:57	1900-01-05 16:37:06	127.899	76.8929	3.2997	19.8913
2011-09-23 14:43:57	1900-01-05 16:44:21	127.857	76.8963	3.2828	19.8831
2011-09-23 14:43:57	1900-01-05 16:51:36	127.821	76.9004	3.1995	19.9827
2011-09-23 14:43:57	1900-01-05 16:58:51	127.798	76.8935	3.1617	19.9378
2011-09-23 14:43:57	1900-01-05 17:06:07	127.785	76.8878	3.1314	19.884
2011-09-23 14:43:57	1900-01-05 17:13:22	127.774	76.8798	3.0957	19.8591
2011-09-23 14:43:57	1900-01-05 17:20:37	127.783	76.8743	3.0696	19.8454
2011-09-23 14:43:57	1900-01-05 17:27:52	127.802	76.8814	3.0892	19.8285
2011-09-23 14:43:57	1900-01-05 17:35:07	127.814	76.8891	3.1474	19.8485
2011-09-23 14:43:57	1900-01-05 17:42:23	127.814	76.8965	3.366	19.7871
2011-09-23 14:43:57	1900-01-05 17:49:38	127.811	76.8965	3.4259	19.8044
2011-09-23 14:43:57	1900-01-05 17:56:53	127.808	76.896	3.4751	19.8205
2011-09-23 14:43:57	1900-01-05 18:04:08	127.806	76.8953	3.516	19.8252
2011-09-23 14:43:57	1900-01-05 18:11:24	127.804	76.8944	3.5299	19.8247
2011-09-23 14:43:57	1900-01-05 18:18:39	127.799	76.8964	3.3376	19.9082
2011-09-23 14:43:57	1900-01-05 18:25:54	127.828	76.8953	3.1923	19.8675
2011-09-23 14:43:57	1900-01-05 18:33:09	127.869	76.8937	3.1829	19.8431
2011-09-23 14:43:57	1900-01-05 18:40:24	127.914	76.8926	3.2141	19.8352
2011-09-23 14:43:57	1900-01-05 18:47:40	127.959	76.8919	3.2531	19.8338
2011-09-23 14:43:57	1900-01-05 18:54:55	128.003	76.8912	3.322	19.8503
2011-09-23 14:43:57	1900-01-05 19:02:10	128.048	76.8907	3.3278	19.8884
2011-09-23 14:43:57	1900-01-05 19:09:25	128.091	76.8902	3.406	19.9492
2011-09-23 14:43:57	1900-01-05 19:16:41	128.137	76.8896	3.4849	20.0614
2011-09-23 14:43:57	1900-01-05 19:23:56	128.181	76.889	3.4167	20.1435
2011-09-23 14:43:57	1900-01-05 19:31:11	128.225	76.8885	3.2228	20.214
2011-09-23 14:43:57	1900-01-05 19:38:26	128.267	76.8878	3.195	20.1949
2011-09-23 14:43:57	1900-01-05 19:45:41	128.309	76.8869	3.2303	20.2387
2011-09-23 14:43:57	1900-01-05 19:52:57	128.347	76.8865	3.3044	20.3152
2011-09-23 14:43:57	1900-01-05 20:00:12	128.384	76.8862	3.4231	20.3191
2011-09-23 14:43:57	1900-01-05 20:07:27	128.421	76.8858	3.3142	20.2917
2011-09-23 14:43:57	1900-01-05 20:14:42	128.462	76.8854	3.26	20.3312
2011-09-23 14:43:57	1900-01-05 20:21:57	128.501	76.8842	3.3407	20.353
2011-09-23 14:43:57	1900-01-05 20:29:13	128.536	76.8835	3.3048	20.504
2011-09-23 14:43:57	1900-01-05 20:36:28	128.572	76.8834	3.1954	20.5706
2011-09-23 14:43:57	1900-01-05 20:43:43	128.606	76.8834	3.1702	20.5944
2011-09-23 14:43:57	1900-01-05 20:50:58	128.644	76.8828	3.2058	20.5807
2011-09-23 14:43:57	1900-01-05 20:58:14	128.684	76.8821	3.3033	20.5547
2011-09-23 14:43:57	1900-01-05 21:05:29	128.723	76.8815	3.286	20.5769
2011-09-23 14:43:57	1900-01-05 21:12:44	128.762	76.8806	3.2266	20.6014
2011-09-23 14:43:57	1900-01-05 21:19:59	128.802	76.8801	3.2195	20.6198
2011-09-23 14:43:57	1900-01-05 21:27:14	128.834	76.8796	3.2263	20.6634
2011-09-23 14:43:57	1900-01-05 21:34:30	128.832	76.8789	3.2538	20.6078
2011-09-23 14:43:57	1900-01-05 21:41:45	128.828	76.8767	3.2482	20.7075
2011-09-23 14:43:57	1900-01-05 21:49:00	128.821	76.875	3.2319	20.7684
2011-09-23 14:43:57	1900-01-05 21:56:15	128.778	76.8765	3.2131	20.8148
2011-09-23 14:43:57	1900-01-05 22:03:31	128.744	76.8825	3.2285	20.8479
2011-09-23 14:43:57	1900-01-05 22:10:46	128.727	76.8923	3.1887	20.7514
2011-09-23 14:43:57	1900-01-05 22:18:01	128.676	76.8961	3.1443	20.7391
2011-09-23 14:43:57	1900-01-05 22:25:16	128.623	76.8963	3.1038	20.7844
2011-09-23 14:43:57	1900-01-05 22:32:31	128.57	76.8968	3.1475	20.7593
2011-09-23 14:43:57	1900-01-05 22:39:47	128.518	76.8974	3.1098	20.7035
2011-09-23 14:43:57	1900-01-05 22:47:02	128.465	76.8988	3.1175	20.6971
2011-09-23 14:43:57	1900-01-05 22:54:17	128.415	76.9003	3.1875	20.7367
2011-09-23 14:43:57	1900-01-05 23:01:32	128.363	76.9015	3.1423	20.7235
2011-09-23 14:43:57	1900-01-05 23:08:47	128.313	76.9026	3.1637	20.7188
2011-09-23 14:43:57	1900-01-05 23:16:03	128.262	76.9039	3.3018	20.6901
2011-09-23 14:43:57	1900-01-05 23:23:18	128.216	76.9077	3.2414	20.5876
2011-09-23 14:43:57	1900-01-05 23:30:33	128.17	76.9114	3.1343	20.5174
2011-09-23 14:43:57	1900-01-05 23:37:48	128.122	76.9129	3.0725	20.487
2011-09-23 14:43:57	1900-01-05 23:45:04	128.084	76.9167	3.2656	20.4243
2011-09-23 14:43:57	1900-01-05 23:52:19	128.046	76.9215	3.3223	20.3979
2011-09-23 14:43:57	1900-01-05 23:59:34	128.008	76.9259	3.3391	20.3351
2011-09-24 18:18:57	1900-01-06 00:06:49	127.972	76.9288	3.3632	20.2974
2011-09-24 18:18:57	1900-01-06 00:14:04	127.935	76.9276	3.3502	20.3176
2011-09-24 18:18:57	1900-01-06 00:21:20	127.899	76.9263	3.2267	20.3117
2011-09-24 18:18:57	1900-01-06 00:28:35	127.87	76.9229	3.13	20.1266
2011-09-24 18:18:57	1900-01-06 00:35:50	127.867	76.9188	3.0684	19.9858
2011-09-24 18:18:57	1900-01-06 00:43:05	127.875	76.9202	3.0509	19.9219
2011-09-24 18:18:57	1900-01-06 00:50:21	127.867	76.9199	3.043	19.8997
2011-09-24 18:18:57	1900-01-06 00:57:36	127.845	76.9126	3.0342	19.8889
2011-09-24 18:18:57	1900-01-06 01:04:51	127.82	76.9004	3.0143	19.8939
2011-09-24 18:18:57	1900-01-06 01:12:06	127.805	76.8964	3.1757	19.8417
2011-09-24 18:18:57	1900-01-06 01:19:21	127.804	76.8957	3.2186	19.8845
2011-09-24 18:18:57	1900-01-06 01:26:37	127.804	76.8952	3.2623	19.9156
2011-09-24 18:18:57	1900-01-06 01:33:52	127.803	76.895	3.2996	19.9369
2011-09-24 18:18:57	1900-01-06 01:41:07	127.804	76.8944	3.3483	19.9565
2011-09-24 18:18:57	1900-01-06 01:48:22	127.803	76.8944	3.3481	19.975
2011-09-24 18:18:57	1900-01-06 01:55:37	127.802	76.8939	3.3831	19.9862
2011-09-24 18:18:57	1900-01-06 02:02:53	127.801	76.8937	3.3951	19.9996
2011-09-24 18:18:57	1900-01-06 02:10:08	127.795	76.8938	3.4503	20.0237
2011-09-24 18:18:57	1900-01-06 02:17:23	127.806	76.8922	3.4194	20.0368
2011-09-24 18:18:57	1900-01-06 02:24:38	127.818	76.8941	3.4539	20.0646
2011-09-24 18:18:57	1900-01-06 02:31:54	127.815	76.8979	3.4541	20.0681
2011-09-24 18:18:57	1900-01-06 02:39:09	127.813	76.8978	3.4695	20.0441
2011-09-24 18:18:57	1900-01-06 02:46:24	127.813	76.8976	3.4941	20.0325
2011-09-24 18:18:57	1900-01-06 02:53:39	127.811	76.8971	3.5131	20.0388
2011-09-24 18:18:57	1900-01-06 03:00:54	127.811	76.8974	3.2939	20.1037
2011-09-24 18:18:57	1900-01-06 03:08:10	127.805	76.8967	3.0557	20.1273
2011-09-24 18:18:57	1900-01-06 03:15:25	127.804	76.8944	3.2159	20.0269
2011-09-24 18:18:57	1900-01-06 03:22:40	127.805	76.8957	3.435	20.0692
2011-09-24 18:18:57	1900-01-06 03:29:55	127.801	76.895	3.4926	20.0879
2011-09-24 18:18:57	1900-01-06 03:37:11	127.802	76.8938	3.5018	20.0964
2011-09-24 18:18:57	1900-01-06 03:44:26	127.802	76.894	3.5087	20.0936
2011-09-24 18:18:57	1900-01-06 03:51:41	127.803	76.8936	3.5617	20.081
2011-09-24 18:18:57	1900-01-06 03:58:56	127.803	76.8936	3.5819	20.0567
2011-09-24 18:18:57	1900-01-06 04:06:11	127.804	76.8936	3.6243	20.0518
2011-09-24 18:18:57	1900-01-06 04:13:27	127.805	76.8932	3.3139	20.146
2011-09-24 18:18:57	1900-01-06 04:20:42	127.836	76.8849	3.1451	20.1146
2011-09-24 18:18:57	1900-01-06 04:27:57	127.87	76.8754	3.1363	20.0715
2011-09-24 18:18:57	1900-01-06 04:35:12	127.905	76.8662	3.1525	19.9784
2011-09-24 18:18:57	1900-01-06 04:42:28	127.94	76.8568	3.1865	19.947
2011-09-24 18:18:57	1900-01-06 04:49:43	127.974	76.8476	3.2145	19.9904
2011-09-24 18:18:57	1900-01-06 04:56:58	128.009	76.8381	3.0944	20.0626
2011-09-24 18:18:57	1900-01-06 05:04:13	128.044	76.8286	3.0116	19.9133
2011-09-24 18:18:57	1900-01-06 05:11:28	128.078	76.8191	2.9773	19.7118
2011-09-24 18:18:57	1900-01-06 05:18:44	128.109	76.8098	2.9487	19.5088
2011-09-24 18:18:57	1900-01-06 05:25:59	128.141	76.8004	2.9731	19.3427
2011-09-24 18:18:57	1900-01-06 05:33:14	128.174	76.7908	3.0268	19.256
2011-09-24 18:18:57	1900-01-06 05:40:29	128.208	76.7814	2.9575	19.1857
2011-09-24 18:18:57	1900-01-06 05:47:45	128.244	76.7723	3.0246	19.1222
2011-09-24 18:18:57	1900-01-06 05:55:00	128.28	76.7637	3.0356	19.0653
2011-09-24 18:18:57	1900-01-06 06:02:15	128.316	76.7547	3.1019	19.0248
2011-09-24 18:18:57	1900-01-06 06:09:30	128.351	76.7454	3.1748	19.0247
2011-09-24 18:18:57	1900-01-06 06:16:45	128.384	76.7355	3.2037	19.0917
2011-09-24 18:18:57	1900-01-06 06:24:01	128.417	76.7261	3.1258	19.1606
2011-09-24 18:18:57	1900-01-06 06:31:16	128.451	76.7167	3.0695	19.175
2011-09-24 18:18:57	1900-01-06 06:38:31	128.486	76.7073	3.1452	18.8836
2011-09-24 18:18:57	1900-01-06 06:45:46	128.519	76.6979	3.0682	18.5252
2011-09-24 18:18:57	1900-01-06 06:53:01	128.552	76.6885	3.0038	18.3104
2011-09-24 18:18:57	1900-01-06 07:00:17	128.583	76.6787	2.9531	18.2094
2011-09-24 18:18:57	1900-01-06 07:07:32	128.617	76.6696	2.9591	18.0914
2011-09-24 18:18:57	1900-01-06 07:14:47	128.653	76.6608	2.9484	18.0289
2011-09-24 18:18:57	1900-01-06 07:22:02	128.688	76.6519	2.9833	18.0287
2011-09-24 18:18:57	1900-01-06 07:29:17	128.723	76.643	2.9805	18.0418
2011-09-24 18:18:57	1900-01-06 07:36:33	128.758	76.6338	3.0056	18.0709
2011-09-24 18:18:57	1900-01-06 07:43:48	128.792	76.6244	3.022	18.1071
2011-09-24 18:18:57	1900-01-06 07:51:03	128.825	76.615	3.0135	18.1386
2011-09-24 18:18:57	1900-01-06 07:58:18	128.86	76.6055	3.0148	18.1589
2011-09-24 18:18:57	1900-01-06 08:05:34	128.894	76.5959	3.0332	18.1392
2011-09-24 18:18:57	1900-01-06 08:12:49	128.929	76.5863	3.0838	18.0954
2011-09-24 18:18:57	1900-01-06 08:20:04	128.964	76.5766	3.0391	18.0796
2011-09-24 18:18:57	1900-01-06 08:27:19	129	76.5669	2.9147	18.1245
2011-09-24 18:18:57	1900-01-06 08:34:34	129.035	76.5572	2.8956	18.156
2011-09-24 18:18:57	1900-01-06 08:41:50	129.071	76.5474	2.9376	18.2087
2011-09-24 18:18:57	1900-01-06 08:49:05	129.105	76.5377	3.1024	18.1912
2011-09-24 18:18:57	1900-01-06 08:56:20	129.138	76.528	3.2143	18.2358
2011-09-24 18:18:57	1900-01-06 09:03:35	129.173	76.5187	3.2613	18.2319
2011-09-24 18:18:57	1900-01-06 09:10:50	129.206	76.5096	3.2727	18.2143
2011-09-24 18:18:57	1900-01-06 09:18:06	129.237	76.5005	3.2691	18.1712
2011-09-24 18:18:57	1900-01-06 09:25:21	129.27	76.4915	3.2678	18.0597
2011-09-24 18:18:57	1900-01-06 09:32:36	129.302	76.4824	3.2574	17.9791
2011-09-24 18:18:57	1900-01-06 09:39:51	129.334	76.4737	3.2527	17.9188
2011-09-24 18:18:57	1900-01-06 09:47:07	129.366	76.4648	3.2617	17.8845
2011-09-24 18:18:57	1900-01-06 09:54:22	129.399	76.4559	3.2806	17.8835
2011-09-24 18:18:57	1900-01-06 10:01:37	129.431	76.4468	3.1958	17.9365
2011-09-24 18:18:57	1900-01-06 10:08:52	129.464	76.4377	3.2104	18.0115
2011-09-24 18:18:57	1900-01-06 10:16:07	129.497	76.4285	3.2247	18.067
2011-09-24 18:18:57	1900-01-06 10:23:23	129.529	76.4194	3.2382	18.095
2011-09-24 18:18:57	1900-01-06 10:30:38	129.563	76.4107	3.2483	18.092
2011-09-24 18:18:57	1900-01-06 10:37:53	129.574	76.4102	3.3302	18.0909
2011-09-24 18:18:57	1900-01-06 10:45:08	129.574	76.4102	3.3673	18.168
2011-09-24 18:18:57	1900-01-06 10:52:24	129.571	76.4099	3.3722	18.2357
2011-09-24 18:18:57	1900-01-06 10:59:39	129.569	76.4091	3.3782	18.2611
2011-09-24 18:18:57	1900-01-06 11:06:54	129.56	76.3944	3.3667	18.2913
2011-09-24 18:18:57	1900-01-06 11:14:09	129.552	76.373	3.289	18.289
2011-09-24 18:18:57	1900-01-06 11:21:24	129.543	76.3521	3.3421	18.1783
2011-09-24 18:18:57	1900-01-06 11:28:40	129.535	76.3313	3.46	18.2975
2011-09-24 18:18:57	1900-01-06 11:35:55	129.527	76.3107	3.462	18.3166
2011-09-24 18:18:57	1900-01-06 11:43:10	129.517	76.2897	3.4629	18.3408
2011-09-24 18:18:57	1900-01-06 11:50:25	129.509	76.2687	3.4974	18.3437
2011-09-24 18:18:57	1900-01-06 11:57:41	129.503	76.2476	3.4132	18.3582
2011-09-24 18:18:57	1900-01-06 12:04:56	129.492	76.2268	3.364	18.2004
2011-09-24 18:18:57	1900-01-06 12:12:11	129.485	76.2058	3.2912	18.0072
2011-09-24 18:18:57	1900-01-06 12:19:26	129.477	76.1848	3.2649	17.85
2011-09-24 18:18:57	1900-01-06 12:26:41	129.468	76.1638	3.25	17.7488
2011-09-24 18:18:57	1900-01-06 12:33:57	129.459	76.1429	3.2667	17.6096
2011-09-24 18:18:57	1900-01-06 12:41:12	129.451	76.1218	3.2707	17.4656
2011-09-24 18:18:57	1900-01-06 12:48:27	129.443	76.1006	3.2655	17.457
2011-09-24 18:18:57	1900-01-06 12:55:42	129.434	76.0798	3.2321	17.4318
2011-09-24 18:18:57	1900-01-06 13:02:57	129.425	76.0588	3.2091	17.246
2011-09-24 18:18:57	1900-01-06 13:10:13	129.418	76.0377	3.244	17.0697
2011-09-24 18:18:57	1900-01-06 13:17:28	129.411	76.0166	3.2723	16.9705
2011-09-24 18:18:57	1900-01-06 13:24:43	129.403	75.9955	3.2863	16.9415
2011-09-24 18:18:57	1900-01-06 13:31:58	129.394	75.9746	3.263	16.9808
2011-09-24 18:18:57	1900-01-06 13:39:14	129.386	75.9538	3.2144	17.0518
2011-09-24 18:18:57	1900-01-06 13:46:29	129.378	75.933	3.2196	16.9898
2011-09-24 18:18:57	1900-01-06 13:53:44	129.368	75.9123	3.2335	17.2091
2011-09-24 18:18:57	1900-01-06 14:00:59	129.36	75.8915	3.2634	17.2988
2011-09-24 18:18:57	1900-01-06 14:08:14	129.351	75.8703	3.2773	17.3639
2011-09-24 18:18:57	1900-01-06 14:15:30	129.343	75.8492	3.2668	17.4571
2011-09-24 18:18:57	1900-01-06 14:22:45	129.337	75.8279	3.2317	17.6287
2011-09-24 18:18:57	1900-01-06 14:30:00	129.328	75.8068	3.1679	17.8035
2011-09-24 18:18:57	1900-01-06 14:37:15	129.32	75.7858	3.1091	17.9281
2011-09-24 18:18:57	1900-01-06 14:44:31	129.315	75.7651	3.1231	17.9615
2011-09-24 18:18:57	1900-01-06 14:51:46	129.31	75.7526	3.1264	17.9834
2011-09-24 18:18:57	1900-01-06 14:59:01	129.302	75.74	3.1473	17.9492
2011-09-24 18:18:57	1900-01-06 15:06:16	129.3	75.7335	3.1527	17.9288
2011-09-24 18:18:57	1900-01-06 15:13:31	129.305	75.733	3.1492	17.9193
2011-09-24 18:18:57	1900-01-06 15:20:47	129.308	75.7322	3.1428	17.9095
2011-09-24 18:18:57	1900-01-06 15:28:02	129.305	75.725	3.1615	17.8968
2011-09-24 18:18:57	1900-01-06 15:35:17	129.292	75.7084	3.1739	17.8989
2011-09-24 18:18:57	1900-01-06 15:42:32	129.285	75.6886	3.1581	17.8837
2011-09-24 18:18:57	1900-01-06 15:49:48	129.278	75.6666	3.1749	17.8758
2011-09-24 18:18:57	1900-01-06 15:57:03	129.269	75.6443	3.1948	17.7931
2011-09-24 18:18:57	1900-01-06 16:04:18	129.262	75.6217	3.208	17.6706
2011-09-24 18:18:57	1900-01-06 16:11:33	129.255	75.599	3.2347	17.5282
2011-09-24 18:18:57	1900-01-06 16:18:48	129.247	75.577	3.2692	17.4346
2011-09-24 18:18:57	1900-01-06 16:26:04	129.24	75.5553	3.3394	17.3483
2011-09-24 18:18:57	1900-01-06 16:33:19	129.233	75.5339	3.3523	17.2898
2011-09-24 18:18:57	1900-01-06 16:40:34	129.227	75.5127	3.3577	17.2901
2011-09-24 18:18:57	1900-01-06 16:47:49	129.22	75.4915	3.3298	17.3181
2011-09-24 18:18:57	1900-01-06 16:55:04	129.213	75.4704	3.3383	17.3697
2011-09-24 18:18:57	1900-01-06 17:02:20	129.206	75.4492	3.3571	17.3922
2011-09-24 18:18:57	1900-01-06 17:09:35	129.2	75.4277	3.2778	17.4156
2011-09-24 18:18:57	1900-01-06 17:16:50	129.191	75.4068	3.2921	17.375
2011-09-24 18:18:57	1900-01-06 17:24:05	129.186	75.3858	3.2705	17.2684
2011-09-24 18:18:57	1900-01-06 17:31:21	129.178	75.3647	3.338	17.2504
2011-09-24 18:18:57	1900-01-06 17:38:36	129.169	75.3437	3.3751	17.284
2011-09-24 18:18:57	1900-01-06 17:45:51	129.164	75.3226	3.3736	17.31
2011-09-24 18:18:57	1900-01-06 17:53:06	129.158	75.3012	3.415	17.17
2011-09-24 18:18:57	1900-01-06 18:00:21	129.151	75.2799	3.4178	17.0872
2011-09-24 18:18:57	1900-01-06 18:07:37	129.143	75.2587	3.3997	17.0541
2011-09-24 18:18:57	1900-01-06 18:14:52	129.136	75.2372	3.3684	17.0502
2011-09-24 18:18:57	1900-01-06 18:22:07	129.132	75.2155	3.3471	17.1506
2011-09-24 18:18:57	1900-01-06 18:29:22	129.124	75.1943	3.3174	17.2095
2011-09-24 18:18:57	1900-01-06 18:36:37	129.115	75.1732	3.3775	17.1127
2011-09-24 18:18:57	1900-01-06 18:43:53	129.109	75.152	3.3872	17.0087
2011-09-24 18:18:57	1900-01-06 18:51:08	129.104	75.1308	3.3894	16.9458
2011-09-24 18:18:57	1900-01-06 18:58:23	129.096	75.1096	3.3708	16.9143
2011-09-24 18:18:57	1900-01-06 19:05:38	129.088	75.0884	3.3817	16.8942
2011-09-24 18:18:57	1900-01-06 19:12:54	129.08	75.0671	3.3645	16.904
2011-09-24 18:18:57	1900-01-06 19:20:09	129.075	75.0466	3.3622	16.8958
2011-09-24 18:18:57	1900-01-06 19:27:24	129.072	75.0329	3.3523	16.8978
2011-09-24 18:18:57	1900-01-06 19:34:39	129.069	75.0205	3.3536	16.9032
2011-09-24 18:18:57	1900-01-06 19:41:54	129.069	75.0176	3.3397	16.8804
2011-09-24 18:18:57	1900-01-06 19:49:10	129.072	75.0188	3.3211	16.8997
2011-09-24 18:18:57	1900-01-06 19:56:25	129.072	75.018	3.3193	16.8964
2011-09-24 18:18:57	1900-01-06 20:03:40	129.061	74.9992	3.311	16.9045
2011-09-24 18:18:57	1900-01-06 20:10:55	129.054	74.9779	3.318	16.8919
2011-09-24 18:18:57	1900-01-06 20:18:11	129.048	74.9565	3.3556	16.8773
2011-09-24 18:18:57	1900-01-06 20:25:26	129.041	74.9348	3.3906	16.847
2011-09-24 18:18:57	1900-01-06 20:32:41	129.033	74.9131	3.45	16.8315
2011-09-24 18:18:57	1900-01-06 20:39:56	129.026	74.8915	3.4588	16.8379
2011-09-24 18:18:57	1900-01-06 20:47:11	129.02	74.8697	3.4463	16.8433
2011-09-24 18:18:57	1900-01-06 20:54:27	129.013	74.8479	3.4408	16.844
2011-09-24 18:18:57	1900-01-06 21:01:42	129.006	74.8262	3.4356	16.8719
2011-09-24 18:18:57	1900-01-06 21:08:57	128.999	74.8046	3.4138	16.9032
2011-09-24 18:18:57	1900-01-06 21:16:12	128.992	74.783	3.3867	16.8939
2011-09-24 18:18:57	1900-01-06 21:23:28	128.985	74.761	3.3418	16.8838
2011-09-24 18:18:57	1900-01-06 21:30:43	128.978	74.7389	3.2759	16.9389
2011-09-24 18:18:57	1900-01-06 21:37:58	128.972	74.7169	3.2553	17.1213
2011-09-24 18:18:57	1900-01-06 21:45:13	128.966	74.695	3.2744	17.166
2011-09-24 18:18:57	1900-01-06 21:52:28	128.957	74.673	3.3175	17.1872
2011-09-24 18:18:57	1900-01-06 21:59:44	128.95	74.651	3.3189	17.2142
2011-09-24 18:18:57	1900-01-06 22:06:59	128.943	74.6295	3.2488	17.258
2011-09-24 18:18:57	1900-01-06 22:14:14	128.939	74.6128	3.1756	17.2393
2011-09-24 18:18:57	1900-01-06 22:21:29	128.935	74.5974	3.1806	17.3758
2011-09-24 18:18:57	1900-01-06 22:28:44	128.932	74.582	3.1692	17.501
2011-09-24 18:18:57	1900-01-06 22:36:00	128.926	74.5666	3.1339	17.5433
2011-09-24 18:18:57	1900-01-06 22:43:15	128.92	74.5504	3.1125	17.5933
2011-09-24 18:18:57	1900-01-06 22:50:30	128.915	74.534	3.0898	17.647
2011-09-24 18:18:57	1900-01-06 22:57:45	128.911	74.5178	3.0564	17.696
2011-09-24 18:18:57	1900-01-06 23:05:01	128.906	74.5012	3.0446	17.7534
2011-09-24 18:18:57	1900-01-06 23:12:16	128.901	74.4845	3.0612	17.6474
2011-09-24 18:18:57	1900-01-06 23:19:31	128.896	74.4677	3.061	17.9625
2011-09-24 18:18:57	1900-01-06 23:26:46	128.891	74.4507	3.0521	18.0665
2011-09-24 18:18:57	1900-01-06 23:34:01	128.885	74.4337	3.055	18.1264
2011-09-24 18:18:57	1900-01-06 23:41:17	128.88	74.4168	3.04	18.2155
2011-09-24 18:18:57	1900-01-06 23:48:32	128.875	74.4003	3.0377	18.2877
2011-09-24 18:18:57	1900-01-06 23:55:47	128.87	74.3846	3.0263	18.3444
2011-09-25 18:18:57	1900-01-07 00:03:02	128.866	74.3688	3.0255	18.3937
2011-09-25 18:18:57	1900-01-07 00:10:17	128.861	74.3529	3.0246	18.4686
2011-09-25 18:18:57	1900-01-07 00:17:33	128.857	74.3372	2.9728	18.5214
2011-09-25 18:18:57	1900-01-07 00:24:48	128.851	74.3214	2.9401	18.5337
2011-09-25 18:18:57	1900-01-07 00:32:03	128.846	74.3056	2.9061	18.5657
2011-09-25 18:18:57	1900-01-07 00:39:18	128.842	74.2899	2.8738	18.6479
2011-09-25 18:18:57	1900-01-07 00:46:34	128.837	74.2751	2.7343	18.7192
2011-09-25 18:18:57	1900-01-07 00:53:49	128.834	74.2651	2.6573	18.7556
2011-09-25 01:02:23	1900-01-07 01:00:50	128.837	74.2613	2.6356	18.8005
2011-09-25 01:10:22	1900-01-07 01:08:05	128.839	74.2615	2.6294	18.8336
2011-09-25 01:18:23	1900-01-07 01:15:21	128.84	74.2618	2.6277	18.8674
2011-09-25 01:26:22	1900-01-07 01:22:36	128.844	74.2617	2.6267	18.8684
2011-09-25 01:34:23	1900-01-07 01:29:51	128.844	74.2556	2.6244	18.8937
2011-09-25 01:42:23	1900-01-07 01:37:06	128.834	74.2433	2.623	18.8907
2011-09-25 01:50:22	1900-01-07 01:44:22	128.825	74.2313	2.6116	18.9049
2011-09-25 01:58:23	1900-01-07 01:51:37	128.82	74.2192	2.6367	18.9345
2011-09-25 02:06:22	1900-01-07 01:58:52	128.815	74.2071	2.6492	18.9923
[truncated: 1,442 more rows]

## Sheet: 2016
Date (UTC)	Longitude	Latitude	Salinity [PSU]	Temperature 38 [C]
2016-09-24 06:00:00	129.075	71.6353	2.8297	5.552
2016-09-24 06:10:00	129.158	71.6386	2.8257	5.7215
2016-09-24 06:20:00	129.241	71.6428	2.8595	5.8037
2016-09-24 06:30:00	129.325	71.6433	2.9325	5.8609
2016-09-24 06:40:00	129.384	71.6225	2.4478	5.721
2016-09-24 06:50:00	129.444	71.6016	1.5158	5.612
2016-09-24 07:00:00	129.505	71.5805	1.4613	5.5351
2016-09-24 07:10:00	129.568	71.5587	1.5169	5.4882
2016-09-24 07:20:00	129.633	71.5362	1.6779	5.4771
2016-09-24 07:30:00	129.698	71.5137	1.7653	5.364
2016-09-24 07:40:00	129.76	71.4915	1.7741	5.4296
2016-09-24 07:50:00	129.822	71.4696	1.9862	5.4439
2016-09-24 08:00:00	129.884	71.448	2.4736	5.6952
2016-09-24 08:10:00	129.945	71.4262	2.454	5.8774
2016-09-24 08:20:00	130.021	71.4164	2.7499	6.0133
2016-09-24 08:30:00	130.108	71.4165	2.8827	6.1433
2016-09-24 08:40:00	130.194	71.4164	2.8637	6.1098
2016-09-24 08:50:00	130.277	71.4164	3.1051	6.0313
2016-09-24 09:00:00	130.332	71.4238	3.675	5.9787
2016-09-24 09:10:00	130.308	71.4498	3.989	5.9681
2016-09-24 09:20:00	130.289	71.4768	3.684	6.1086
2016-09-24 09:30:00	130.269	71.5035	3.3939	6.2019
2016-09-24 09:40:00	130.25	71.5304	3.2468	6.1352
2016-09-24 09:50:00	130.23	71.5571	3.2403	6.0527
2016-09-24 10:00:00	130.211	71.5833	3.2237	6.0451
2016-09-24 10:10:00	130.192	71.6097	3.2285	6.0469
2016-09-24 10:20:00	130.172	71.6359	2.8292	6.0267
2016-09-24 10:30:00	130.152	71.662	2.4463	5.8972
2016-09-24 10:40:00	130.132	71.6885	2.02	5.5968
2016-09-24 10:50:00	130.112	71.7147	1.8674	5.6124
2016-09-24 11:00:00	130.092	71.741	1.9078	5.4135
2016-09-24 11:10:00	130.074	71.7665	2.3968	5.3309
2016-09-24 11:20:00	130.06	71.7845	2.5797	5.514
2016-09-24 11:30:00	130.055	71.7915	3.1382	5.6159
2016-09-24 11:40:00	130.052	71.7916	3.2227	5.6272
2016-09-24 11:50:00	130.056	71.7895	3.2517	5.6032
2016-09-24 12:00:00	130.06	71.7872	3.281	5.6042
2016-09-24 12:10:00	130.062	71.7847	3.298	5.6035
2016-09-24 12:20:00	130.065	71.7824	3.3131	5.6083
2016-09-24 12:30:00	130.068	71.7807	3.3326	5.609
2016-09-24 12:40:00	130.067	71.7762	3.3426	5.6215
2016-09-24 12:50:00	130.095	71.7679	3.3669	5.6447
2016-09-24 13:00:00	130.129	71.7586	3.4231	5.5529
2016-09-24 13:10:00	130.163	71.7494	3.1639	5.3895
2016-09-24 13:20:00	130.196	71.7404	2.3494	5.3213
2016-09-24 13:30:00	130.229	71.7313	2.2875	5.3984
2016-09-24 13:40:00	130.261	71.7223	1.8525	5.6949
2016-09-24 13:50:00	130.293	71.7133	1.741	5.7115
2016-09-24 14:00:00	130.325	71.7041	1.7342	5.7645
2016-09-24 14:10:00	130.354	71.6959	2.2464	5.952
2016-09-24 14:20:00	130.368	71.6922	2.5104	5.975
2016-09-24 14:30:00	130.371	71.6915	2.6123	5.9646
2016-09-24 14:40:00	130.375	71.6901	2.6457	5.9394
2016-09-24 14:50:00	130.367	71.6913	2.6833	5.9394
2016-09-24 15:00:00	130.343	71.7081	2.7261	5.9927
2016-09-24 15:10:00	130.316	71.7284	2.7122	5.8453
2016-09-24 15:20:00	130.284	71.7509	2.2286	5.7449
2016-09-24 15:30:00	130.25	71.7756	1.7119	5.6061
2016-09-24 15:40:00	130.216	71.8009	1.5543	5.4963
2016-09-24 15:50:00	130.203	71.8282	1.5353	5.5209
2016-09-24 16:00:00	130.191	71.8551	3.1126	5.352
2016-09-24 16:10:00	130.176	71.8828	4.0256	4.8258
2016-09-24 16:20:00	130.162	71.9107	4.4855	4.8682
2016-09-24 16:30:00	130.149	71.9385	4.4531	4.9261
2016-09-24 16:40:00	130.137	71.9655	4.694	4.9556
2016-09-24 16:50:00	130.123	71.9924	3.8786	5.2058
2016-09-24 17:00:00	130.11	72.0194	3.3345	5.1852
2016-09-24 17:10:00	130.096	72.0465	3.7416	5.0978
2016-09-24 17:20:00	130.082	72.0741	3.7716	5.2154
2016-09-24 17:30:00	130.069	72.1012	3.0946	5.0986
2016-09-24 17:40:00	130.059	72.1223	2.096	5.0633
2016-09-24 17:50:00	130.056	72.1279	1.7309	4.4749
2016-09-24 18:00:00	130.056	72.1283	2.0214	4.1613
2016-09-24 18:10:00	130.055	72.1254	2.2333	4.1436
2016-09-24 18:20:00	130.054	72.1229	2.262	4.1014
2016-09-24 18:30:00	130.056	72.1326	2.325	4.1038
2016-09-24 18:40:00	130.061	72.1442	3.2019	4.4786
2016-09-24 18:50:00	130.065	72.1566	4.197	4.2053
2016-09-24 19:00:00	130.069	72.1696	5.5001	3.9882
2016-09-24 19:10:00	130.074	72.183	5.6587	4.1549
2016-09-24 19:20:00	130.079	72.196	4.552	4.3116
2016-09-24 19:30:00	130.083	72.2078	3.397	4.324
2016-09-24 19:40:00	130.088	72.2208	2.7888	4.1673
2016-09-24 19:50:00	130.092	72.2337	2.5469	4.0021
2016-09-24 20:00:00	130.097	72.2472	2.7738	3.6431
2016-09-24 20:10:00	130.096	72.2526	3.7567	3.4142
2016-09-24 20:20:00	130.094	72.2486	3.9812	3.37
2016-09-24 20:30:00	130.096	72.2442	4.0891	3.3423
2016-09-24 20:40:00	130.093	72.2398	4.1741	3.3252
2016-09-24 20:50:00	130.094	72.2478	4.2397	3.3223
2016-09-24 21:00:00	130.101	72.2612	4.2074	3.412
2016-09-24 21:10:00	130.106	72.2738	3.8486	3.5088
2016-09-24 21:20:00	130.112	72.2863	3.5719	3.5302
2016-09-24 21:30:00	130.116	72.2987	3.3599	3.3845
2016-09-24 21:40:00	130.121	72.3113	3.6613	3.4713
2016-09-24 21:50:00	130.126	72.3239	3.7101	3.4921
2016-09-24 22:00:00	130.132	72.3366	2.8876	3.6122
2016-09-24 22:10:00	130.136	72.3492	3.0874	3.1624
2016-09-24 22:20:00	130.141	72.3614	4.2969	2.9926
2016-09-24 22:30:00			5.1375	3.0123
2016-09-24 22:40:00			5.4016	3.083
2016-09-24 22:50:00			5.9441	3.1316
2016-09-24 23:00:00			7.0603	3.0714
2016-09-24 23:10:00			8.0804	2.9845
2016-09-24 23:20:00			10.2387	3.0897
2016-09-24 23:30:00			11.7119	3.0986
2016-09-24 23:40:00			13.1603	3.1635
2016-09-24 23:50:00			13.452	2.939
2016-09-25			13.4617	2.7741
2016-09-25 00:10:00			13.2017	2.9842
2016-09-25 00:20:00			13.417	3.1597
2016-09-25 00:30:00			13.5503	3.2411
2016-09-25 00:40:00			13.635	3.2305
2016-09-25 00:50:00			13.6718	3.2822
2016-09-25 01:00:00			13.7136	3.3126
2016-09-25 01:10:00			13.7612	3.3094
2016-09-25 01:20:00			13.7765	3.3098
2016-09-25 01:30:00			13.7295	3.2999
2016-09-25 01:40:00			13.7384	3.254
2016-09-25 01:50:00			14.2463	3.1863
2016-09-25 02:00:00			14.7689	3.0534
2016-09-25 02:10:00			14.8116	3.0493
2016-09-25 02:20:00			15.0279	2.9491
2016-09-25 02:30:00			14.6365	2.9426
2016-09-25 02:40:00			12.9109	2.9783
2016-09-25 02:50:00			10.8574	2.8854
2016-09-25 03:00:00			9.7235	2.7168
2016-09-25 03:10:00			8.817	2.8632
2016-09-25 03:20:00			10.4954	3.1052
2016-09-25 03:30:00	130.268	72.6976	12.8229	3.2183
2016-09-25 03:40:00	130.273	72.7105	14.3901	2.5481
2016-09-25 03:50:00	130.289	72.723	15.1988	2.4523
2016-09-25 04:00:00	130.305	72.7357	15.7065	2.7046
2016-09-25 04:10:00	130.321	72.7487	16.0942	2.7053
2016-09-25 04:20:00	130.338	72.7615	16.2184	2.8628
2016-09-25 04:30:00	130.352	72.7724	16.3235	2.9523
2016-09-25 04:40:00	130.354	72.775	16.2833	3.0219
2016-09-25 04:50:00	130.35	72.7736	16.2261	3.068
2016-09-25 05:00:00	130.345	72.7742	16.2185	3.1021
2016-09-25 05:10:00	130.353	72.7755	16.2218	3.0821
2016-09-25 05:20:00	130.35	72.7876	16.1873	3.11
2016-09-25 05:30:00	130.342	72.8005	16.0829	3.1382
2016-09-25 05:40:00	130.336	72.814	15.6039	3.2596
2016-09-25 05:50:00	130.328	72.8276	14.9543	3.2656
2016-09-25 06:00:00	130.321	72.8407	14.592	3.2455
2016-09-25 06:10:00	130.314	72.8538	14.1912	3.2188
2016-09-25 06:20:00	130.307	72.8668	14.2055	3.2479
2016-09-25 06:30:00	130.3	72.8795	14.308	3.1526
2016-09-25 06:40:00	130.293	72.8929	14.4972	3.1592
2016-09-25 06:50:00	130.285	72.907	15.1971	3.1927
2016-09-25 07:00:00	130.278	72.9203	15.3782	3.185
2016-09-25 07:10:00	130.272	72.9328	15.4769	3.1655
2016-09-25 07:20:00	130.266	72.9453	15.4335	3.1377
2016-09-25 07:30:00	130.259	72.9587	15.3457	3.1073
2016-09-25 07:40:00	130.252	72.9713	15.2794	3.1208
2016-09-25 07:50:00	130.244	72.9837	15.273	3.1553
2016-09-25 08:00:00	130.236	72.9964	15.7336	2.6295
2016-09-25 08:10:00	130.23	73.0092	15.9741	1.8789
2016-09-25 08:20:00	130.223	73.0224	16.541	2.0889
2016-09-25 08:30:00	130.215	73.0365	17.3375	1.9577
2016-09-25 08:40:00	130.208	73.0513	17.6172	1.7704
2016-09-25 08:50:00	130.2	73.0646	17.8239	2.0916
2016-09-25 09:00:00	130.193	73.0715	17.4595	2.6355
2016-09-25 09:10:00	130.19	73.07	17.3386	2.6178
2016-09-25 09:20:00	130.192	73.0713	17.3831	2.7395
2016-09-25 09:30:00	130.197	73.0728	16.7406	2.7201
2016-09-25 09:40:00	130.195	73.0766	17.2001	2.7357
2016-09-25 09:50:00	130.198	73.0821	16.5613	2.8985
2016-09-25 10:00:00	130.197	73.0815	16.8917	2.7538
2016-09-25 10:10:00	130.197	73.0808	17.3063	2.7727
2016-09-25 10:20:00	130.185	73.0832	17.2119	2.8676
2016-09-25 10:30:00	130.169	73.1044	16.3245	2.9542
2016-09-25 10:40:00	130.149	73.1313	15.7907	2.9745
2016-09-25 10:50:00	130.127	73.1594	15.3913	2.9249
2016-09-25 11:00:00	130.107	73.1869	15.1897	2.8321
2016-09-25 11:10:00	130.122	73.2146	16.6955	2.323
2016-09-25 11:20:00	130.138	73.2423	17.2647	1.4235
2016-09-25 11:30:00	130.154	73.2702	17.5069	1.3766
2016-09-25 11:40:00	130.17	73.2986	16.3536	1.4624
2016-09-25 11:50:00	130.185	73.3277	15.6777	1.7394
2016-09-25 12:00:00	130.204	73.3571	15.0526	1.9968
2016-09-25 12:10:00	130.222	73.3869	14.872	2.0912
2016-09-25 12:20:00	130.239	73.4167	14.6677	2.3772
2016-09-25 12:30:00	130.256	73.4465	14.5283	2.477
2016-09-25 12:40:00	130.274	73.4763	14.468	2.4142
2016-09-25 12:50:00	130.291	73.506	14.4667	2.4494
2016-09-25 13:00:00	130.309	73.5358	14.428	2.2824
2016-09-25 13:10:00	130.326	73.5655	14.4049	2.0702
2016-09-25 13:20:00	130.343	73.5948	15.2017	1.595
2016-09-25 13:30:00	130.359	73.6237	16.6122	1.1976
2016-09-25 13:40:00	130.376	73.6526	18.5039	0.857
2016-09-25 13:50:00	130.394	73.6812	20.1191	0.4932
2016-09-25 14:00:00	130.409	73.709	20.6877	0.5297
2016-09-25 14:10:00	130.427	73.7369	20.5878	0.5792
2016-09-25 14:20:00	130.444	73.7651	20.2581	0.6365
2016-09-25 14:30:00	130.46	73.7933	19.8443	0.7369
2016-09-25 14:40:00	130.476	73.8209	17.9645	0.9686
2016-09-25 14:50:00	130.5	73.8486	17.6606	0.7771
2016-09-25 15:00:00	130.51	73.8768	19.1094	0.7861
2016-09-25 15:10:00	130.526	73.9048	20.0217	0.7339
2016-09-25 15:20:00	130.512	73.9317	20.5122	0.7007
2016-09-25 15:30:00	130.473	73.958	21.2426	0.2847
2016-09-25 15:40:00	130.435	73.9838	21.9672	0.1841
2016-09-25 15:50:00	130.398	74.0098	22.2669	0.285
2016-09-25 16:00:00	130.36	74.0359	21.8957	0.3607
2016-09-25 16:10:00	130.322	74.0623	21.3224	0.2783
2016-09-25 16:20:00	130.282	74.0883	22.8863	-0.0722
2016-09-25 16:30:00	130.246	74.1144	24.0344	-0.1105
2016-09-25 16:40:00	130.207	74.1404	24.8769	-0.3194
2016-09-25 16:50:00	130.169	74.1663	25.2011	-0.4608
2016-09-25 17:00:00	130.132	74.192	25.3095	-0.4273
2016-09-25 17:10:00	130.093	74.2177	26.1081	-0.4149
2016-09-25 17:20:00	130.054	74.2437	26.3501	-0.2716
2016-09-25 17:30:00	130.016	74.2697	26.5291	-0.2635
2016-09-25 17:40:00	129.978	74.2956	26.8159	-0.2627
2016-09-25 17:50:00	129.94	74.3213	26.805	-0.3157
2016-09-25 18:00:00	129.903	74.3468	25.6131	-0.2384
2016-09-25 18:10:00	129.865	74.3724	25.2306	-0.1475
2016-09-25 18:20:00	129.825	74.3986	25.2955	-0.4009
2016-09-25 18:30:00	129.785	74.4249	25.7931	-0.6108
2016-09-25 18:40:00	129.745	74.4511	25.9781	-0.7467
2016-09-25 18:50:00	129.707	74.4774	26.1246	-0.6241
2016-09-25 19:00:00	129.669	74.5036	26.316	-0.5408
2016-09-25 19:10:00	129.629	74.5298	26.4202	-0.5742
2016-09-25 19:20:00	129.588	74.5565	26.6354	-0.4983
2016-09-25 19:30:00	129.547	74.5839	27.2092	-0.0338
2016-09-25 19:40:00	129.504	74.6117	27.5679	0.1155
2016-09-25 19:50:00	129.464	74.6393	27.7706	0.129
2016-09-25 20:00:00	129.422	74.6668	27.8778	0.2724
2016-09-25 20:10:00	129.379	74.6943	28.3975	0.1027
2016-09-25 20:20:00	129.337	74.7215	28.3779	0.2957
2016-09-25 20:30:00	129.296	74.7484	28.5345	0.1591
2016-09-25 20:40:00	129.255	74.7754	28.6287	0.0232
2016-09-25 20:50:00	129.213	74.8026	28.6239	-0.1452
2016-09-25 21:00:00	129.177	74.8303	28.6199	-0.2988
2016-09-25 21:10:00	129.131	74.8568	28.5068	-0.6578
2016-09-25 21:20:00	129.09	74.8836	28.2759	-0.7374
2016-09-25 21:30:00	129.049	74.9106	28.2199	-0.6838
2016-09-25 21:40:00	129.006	74.9374	28.1635	-0.6362
2016-09-25 21:50:00	128.964	74.9645	28.2054	-0.7357
2016-09-25 22:00:00	128.923	74.9915	28.1946	-0.7529
2016-09-25 22:10:00	128.881	75.0184	28.227	-0.7206
2016-09-25 22:20:00	128.84	75.0455	28.2638	-0.7465
2016-09-25 22:30:00	128.797	75.0723	28.2986	-0.8218
2016-09-25 22:40:00	128.755	75.099	28.2948	-0.8378
2016-09-25 22:50:00	128.715	75.1251	28.2916	-0.8279
2016-09-25 23:00:00	128.673	75.1519	28.3153	-0.8466
2016-09-25 23:10:00	128.631	75.1787	28.3366	-0.8158
2016-09-25 23:20:00	128.589	75.2056	28.3546	-0.838
2016-09-25 23:30:00	128.547	75.2323	28.4164	-0.9486
2016-09-25 23:40:00	128.505	75.259	28.3279	-0.8161
2016-09-25 23:50:00	128.462	75.2859	28.3147	-0.8179
2016-09-26	128.419	75.3129	28.3027	-0.8641
2016-09-26 00:10:00	128.379	75.3387	28.3842	-0.9748
2016-09-26 00:20:00	128.348	75.3582	28.3571	-0.9689
2016-09-26 00:30:00	128.338	75.3638	28.3322	-0.9773
2016-09-26 00:40:00	128.337	75.3628	28.3432	-0.9266
2016-09-26 00:50:00	128.33	75.3683	28.3772	-0.9279
2016-09-26 01:00:00	128.332	75.3799	28.4411	-1.0953
2016-09-26 01:10:00	128.344	75.3923	28.3359	-1.058
2016-09-26 01:20:00	128.356	75.4052	28.2844	-1.0392
2016-09-26 01:30:00	128.368	75.4172	28.2459	-1.048
2016-09-26 01:40:00	128.379	75.4288	28.2499	-1.0975
2016-09-26 01:50:00	128.39	75.4406	28.2831	-1.1468
2016-09-26 02:00:00	128.404	75.4529	28.2773	-1.1763
2016-09-26 02:10:00	128.401	75.4508	28.2804	-1.1512
2016-09-26 02:20:00	128.386	75.4371	28.3208	-1.176
2016-09-26 02:30:00	128.374	75.4235	28.3242	-1.1757
2016-09-26 02:40:00	128.361	75.4102	28.299	-1.1032
2016-09-26 02:50:00	128.36	75.4057	28.2639	-1.037
2016-09-26 03:00:00	128.372	75.4193	28.2335	-1.0516
2016-09-26 03:10:00	128.385	75.4327	28.262	-1.1285
2016-09-26 03:20:00	128.4	75.4459	28.2868	-1.1634
2016-09-26 03:30:00	128.385	75.4384	28.2922	-1.1715
2016-09-26 03:40:00	128.372	75.4248	28.2949	-1.1725
2016-09-26 03:50:00	128.383	75.4274	28.2829	-1.1078
2016-09-26 04:00:00	128.397	75.4409	28.3055	-1.1529
2016-09-26 04:10:00	128.379	75.4347	28.3051	-1.1762
2016-09-26 04:20:00	128.373	75.4213	28.3018	-1.14
2016-09-26 04:30:00	128.393	75.4345	28.3118	-1.1435
2016-09-26 04:40:00	128.392	75.4444	28.3275	-1.1699
2016-09-26 04:50:00	128.374	75.432	28.307	-1.1579
2016-09-26 05:00:00	128.372	75.4205	28.283	-1.1062
2016-09-26 05:10:00	128.393	75.4322	28.2917	-1.0923
2016-09-26 05:20:00	128.398	75.4447	28.3139	-1.156
2016-09-26 05:30:00	128.373	75.4334	28.3045	-1.1527
2016-09-26 05:40:00	128.365	75.4201	28.2943	-1.0856
2016-09-26 05:50:00	128.392	75.4295	28.2719	-1.0428
2016-09-26 06:00:00	128.406	75.4439	28.2865	-1.1182
2016-09-26 06:10:00	128.431	75.4442	28.3084	-1.1514
2016-09-26 06:20:00	128.462	75.4334	28.2962	-1.1294
2016-09-26 06:30:00	128.442	75.43	28.2992	-1.1123
2016-09-26 06:40:00	128.388	75.4327	28.3797	-1.165
2016-09-26 06:50:00	128.335	75.4353	28.3311	-1.0687
2016-09-26 07:00:00	128.28	75.4381	28.3464	-1.0365
2016-09-26 07:10:00	128.277	75.4414	28.2722	-0.9442
2016-09-26 07:20:00	128.319	75.4339	28.2231	-0.9054
2016-09-26 07:30:00	128.362	75.4263	28.2305	-0.9851
2016-09-26 07:40:00	128.372	75.4243	28.239	-1.0461
2016-09-26 07:50:00	128.37	75.4232	0	-1.0603
2016-09-26 08:00:00	128.368	75.4222	28.2555	-1.063
2016-09-26 08:10:00	128.365	75.4209	28.2565	-1.065
2016-09-26 08:20:00	128.362	75.4197	28.2432	-1.0687
2016-09-26 08:30:00	128.36	75.4185	28.2539	-1.0652
2016-09-26 08:40:00	128.361	75.4163	28.2619	-1.0715
2016-09-26 08:50:00	128.37	75.4289	28.2308	-1.0611
2016-09-26 09:00:00	128.373	75.4341	28.2505	-1.0598
2016-09-26 09:10:00	128.372	75.4334	28.2714	-1.0571
2016-09-26 09:20:00	128.379	75.437	28.3095	-1.0499
2016-09-26 09:30:00	128.389	75.4414	28.327	-1.1058
2016-09-26 09:40:00	128.388	75.441	28.2869	-1.1139
2016-09-26 09:50:00	128.386	75.4403	28.2879	-1.1139
2016-09-26 10:00:00	128.381	75.4402	28.2878	-1.1254
2016-09-26 10:10:00	128.344	75.4517	28.2189	-1.0628
2016-09-26 10:20:00	128.286	75.4715	28.1782	-1.0114
2016-09-26 10:30:00	128.217	75.4955	28.1983	-0.9255
2016-09-26 10:40:00	128.145	75.5195	28.1903	-0.9175
2016-09-26 10:50:00	128.072	75.5438	28.1555	-0.7436
2016-09-26 11:00:00	127.997	75.5682	28.1333	-0.502
2016-09-26 11:10:00	127.922	75.5924	28.2181	-0.5541
2016-09-26 11:20:00	127.851	75.6164	28.1744	-0.4328
2016-09-26 11:30:00	127.779	75.6401	28.1741	-0.3226
2016-09-26 11:40:00	127.706	75.6638	28.1859	-0.3001
2016-09-26 11:50:00	127.633	75.6873	28.2215	-0.3942
2016-09-26 12:00:00	127.575	75.7068	28.249	-0.5142
2016-09-26 12:10:00	127.519	75.7254	28.2332	-0.504
2016-09-26 12:20:00	127.463	75.7438	28.1831	-0.3599
2016-09-26 12:30:00	127.406	75.7618	28.0898	0.0656
2016-09-26 12:40:00	127.353	75.7792	28.2706	0.1134
2016-09-26 12:50:00	127.299	75.7969	28.2638	0.1183
2016-09-26 13:00:00	127.245	75.8148	28.2873	-0.157
2016-09-26 13:10:00	127.19	75.8325	28.124	0.0586
2016-09-26 13:20:00	127.135	75.8504	28.1577	0.2027
2016-09-26 13:30:00	127.08	75.8682	28.2522	0.2715
2016-09-26 13:40:00	127.024	75.886	28.2848	0.2616
2016-09-26 13:50:00	126.967	75.9039	28.3241	0.2527
2016-09-26 14:00:00	126.912	75.922	28.3533	0.2439
2016-09-26 14:10:00	126.857	75.9401	28.3359	0.316
2016-09-26 14:20:00	126.801	75.9583	28.333	0.3495
2016-09-26 14:30:00	126.752	75.9735	28.3368	0.269
2016-09-26 14:40:00	126.71	75.9885	28.2781	0.2684
2016-09-26 14:50:00	126.663	76.0021	28.2882	0.2912
2016-09-26 15:00:00	126.617	76.0165	28.3052	0.2154
2016-09-26 15:10:00	126.573	76.031	28.2081	0.1784
2016-09-26 15:20:00	126.529	76.0451	28.0902	0.2513
2016-09-26 15:30:00	126.482	76.0604	28.0502	0.409
2016-09-26 15:40:00	126.433	76.0763	28.0838	0.2837
2016-09-26 15:50:00	126.382	76.092	28.0471	0.2756
2016-09-26 16:00:00	126.336	76.1062	28.072	0.2099
2016-09-26 16:10:00	126.292	76.1207	28.0417	0.2407
2016-09-26 16:20:00	126.249	76.1354	28.0458	0.2436
2016-09-26 16:30:00	126.204	76.1493	28.0822	0.2214
2016-09-26 16:40:00	126.159	76.1632	28.0986	0.2958
2016-09-26 16:50:00	126.115	76.1772	28.1516	0.3019
2016-09-26 17:00:00	126.069	76.1913	28.1472	0.2589
2016-09-26 17:10:00	126.024	76.2055	28.1107	0.3409
2016-09-26 17:20:00	125.976	76.2207	28.1266	0.3807
2016-09-26 17:30:00	125.924	76.2374	28.0928	0.3895
2016-09-26 17:40:00	125.869	76.2543	28.0626	0.5644
2016-09-26 17:50:00	125.814	76.2722	28.1432	0.6984
2016-09-26 18:00:00	125.757	76.2899	28.2347	0.6403
2016-09-26 18:10:00	125.7	76.3077	28.2875	0.6594
2016-09-26 18:20:00	125.643	76.3253	28.2748	0.7181
2016-09-26 18:30:00	125.587	76.3428	28.2944	0.7159
2016-09-26 18:40:00	125.531	76.3606	28.2844	0.7318
2016-09-26 18:50:00	125.474	76.3783	28.3049	0.7663
2016-09-26 19:00:00	125.43	76.3923	28.3131	0.732
2016-09-26 19:10:00	125.416	76.3932	28.3359	0.7212
2016-09-26 19:20:00	125.401	76.393	28.3367	0.7009
2016-09-26 19:30:00	125.386	76.3934	28.4372	0.6999
2016-09-26 19:40:00	125.372	76.3935	28.4736	0.6669
2016-09-26 19:50:00	125.393	76.395	28.5008	0.6309
2016-09-26 20:00:00	125.449	76.3947	28.5743	0.689
2016-09-26 20:10:00	125.431	76.3988	28.5453	0.697
2016-09-26 20:20:00	125.414	76.3985	28.52	0.6836
2016-09-26 20:30:00	125.4	76.3982	28.557	0.6651
2016-09-26 20:40:00	125.413	76.3995	28.605	0.6359
2016-09-26 20:50:00	125.427	76.3977	28.6174	0.6897
2016-09-26 21:00:00	125.416	76.3991	28.5842	0.7068
2016-09-26 21:10:00	125.428	76.3981	28.5967	0.7563
2016-09-26 21:20:00	125.415	76.3977	28.5988	0.6889
2016-09-26 21:30:00	125.401	76.3978	28.6083	0.7163
2016-09-26 21:40:00	125.389	76.3978	28.6239	0.695
2016-09-26 21:50:00	125.422	76.3989	28.6451	0.7249
2016-09-26 22:00:00	125.424	76.3986	28.6608	0.8335
2016-09-26 22:10:00	125.412	76.3976	28.6144	0.6797
2016-09-26 22:20:00	125.4	76.3973	28.6224	0.6783
2016-09-26 22:30:00	125.398	76.3985	28.6138	0.6723
2016-09-26 22:40:00	125.427	76.3986	28.672	0.7265
2016-09-26 22:50:00	125.431	76.3986	28.6039	0.8313
2016-09-26 23:00:00	125.42	76.3985	0	0.9151
2016-09-26 23:10:00	125.412	76.3988	28.5951	0.7859
2016-09-26 23:20:00	125.418	76.3986	28.5914	0.869
2016-09-26 23:30:00	125.403	76.3989	28.6091	0.8463
2016-09-26 23:40:00	125.415	76.3977	28.5841	0.858
2016-09-26 23:50:00	125.418	76.3989	28.6497	0.9249
2016-09-27	125.421	76.3954	28.6522	0.882
2016-09-27 00:10:00	125.429	76.3922	28.5739	0.9512
2016-09-27 00:20:00	125.455	76.3914	28.6513	0.8127
2016-09-27 00:30:00	125.476	76.3992	28.5329	0.972
2016-09-27 00:40:00	125.466	76.3998	28.5463	0.8383
2016-09-27 00:50:00	125.455	76.3992	28.4993	0.8405
2016-09-27 01:00:00	125.46	76.4105	28.4703	0.8738
2016-09-27 01:10:00	125.483	76.4313	28.4779	0.8739
2016-09-27 01:20:00	125.51	76.4569	28.4888	0.7722
2016-09-27 01:30:00	125.534	76.4857	28.5084	0.6744
2016-09-27 01:40:00	125.559	76.514	28.6584	0.6457
2016-09-27 01:50:00	125.584	76.5418	28.9831	0.6025
2016-09-27 02:00:00	125.612	76.5691	29.1017	0.5148
2016-09-27 02:10:00	125.638	76.5968	29.1716	0.5128
2016-09-27 02:20:00	125.663	76.6245	29.1274	0.6504
2016-09-27 02:30:00	125.689	76.6519	29.3133	0.6558
2016-09-27 02:40:00	125.715	76.6793	29.472	0.6686
2016-09-27 02:50:00	125.742	76.7068	29.5246	0.6639
2016-09-27 03:00:00	125.768	76.7343	29.6082	0.5374
2016-09-27 03:10:00	125.789	76.756	29.6016	0.5169
2016-09-27 03:20:00	125.784	76.7594	29.8302	0.3298
2016-09-27 03:30:00	125.773	76.7585	29.9557	0.253
2016-09-27 03:40:00	125.763	76.7579	30.0166	0.2306
2016-09-27 03:50:00	125.771	76.7571	30.0599	0.2324
2016-09-27 04:00:00	125.794	76.7681	30.1485	0.2498
2016-09-27 04:10:00	125.796	76.7819	30.0967	0.2853
2016-09-27 04:20:00	125.801	76.7954	30.141	0.3091
2016-09-27 04:30:00	125.803	76.795	30.084	0.325
2016-09-27 04:40:00	125.801	76.7819	30.1503	0.297
2016-09-27 04:50:00	125.797	76.7689	30.2379	0.3222
2016-09-27 05:00:00	125.791	76.7556	30.3008	0.2506
2016-09-27 05:10:00	125.801	76.7665	30.244	0.2381
2016-09-27 05:20:00	125.806	76.7816	30.1911	0.3063
2016-09-27 05:30:00	125.81	76.7947	30.2355	0.2795
2016-09-27 05:40:00	125.814	76.7953	30.2478	0.2808
2016-09-27 05:50:00	125.809	76.7817	30.2651	0.3042
2016-09-27 06:00:00	125.805	76.7681	30.2541	0.3018
2016-09-27 06:10:00	125.798	76.7549	30.2779	0.2582
2016-09-27 06:20:00	125.808	76.7648	30.1489	0.2482
2016-09-27 06:30:00	125.813	76.7789	30.0731	0.2774
2016-09-27 06:40:00	125.818	76.7935	30.0925	0.3009
2016-09-27 06:50:00	125.824	76.7984	30.1474	0.267
2016-09-27 07:00:00	125.82	76.7857	30.1394	0.2825
2016-09-27 07:10:00	125.816	76.7729	30.1944	0.2984
2016-09-27 07:20:00	125.812	76.7602	30.2246	0.2663
2016-09-27 07:30:00	125.816	76.758	30.0595	0.3187
2016-09-27 07:40:00	125.82	76.7724	29.9306	0.2919
2016-09-27 07:50:00	125.825	76.7873	29.904	0.3106
2016-09-27 08:00:00	125.826	76.8015	29.9809	0.2753
2016-09-27 08:10:00	125.832	76.7958	30.0473	0.2688
2016-09-27 08:20:00	125.828	76.7828	30.1019	0.298
2016-09-27 08:30:00	125.824	76.7702	30.1882	0.2507
2016-09-27 08:40:00	125.82	76.7575	30.0576	0.2981
2016-09-27 08:50:00	125.827	76.7614	29.8709	0.4086
2016-09-27 09:00:00	125.832	76.777	29.8176	0.3321
2016-09-27 09:10:00	125.836	76.7921	29.8155	0.2502
2016-09-27 09:20:00	125.848	76.8005	29.9275	0.2633
2016-09-27 09:30:00	125.838	76.7861	30.0128	0.2679
2016-09-27 09:40:00	125.833	76.7752	30.0512	0.2763
2016-09-27 09:50:00	125.835	76.7757	29.9914	0.3601
2016-09-27 10:00:00	125.837	76.7741	29.9474	0.4191
2016-09-27 10:10:00	125.832	76.7744	0	0.4553
2016-09-27 10:20:00	125.831	76.7745	29.8755	0.3915
2016-09-27 10:30:00	125.833	76.7741	29.9109	0.3718
2016-09-27 10:40:00	125.831	76.7747	29.8896	0.3336
2016-09-27 10:50:00	125.832	76.7745	30.0173	0.2899
2016-09-27 11:00:00	125.851	76.7641	30.0513	0.3388
2016-09-27 11:10:00	125.951	76.7464	29.9292	0.4784
2016-09-27 11:20:00	126.053	76.7277	29.6962	0.5624
2016-09-27 11:30:00	126.062	76.7218	29.4915	0.5987
2016-09-27 11:40:00	125.975	76.7413	29.6815	0.5773
2016-09-27 11:50:00	125.893	76.7594	29.6302	0.5058
2016-09-27 12:00:00	125.838	76.7713	29.6484	0.4372
2016-09-27 12:10:00	125.826	76.774	0	0.3725
2016-09-27 12:20:00	125.824	76.7738	30.0474	0.3145
2016-09-27 12:30:00	125.828	76.7748	30.0695	0.3176
2016-09-27 12:40:00	125.829	76.7762	0	0.3394
2016-09-27 12:50:00	125.829	76.7762	30.1798	0.3505
2016-09-27 13:00:00	125.833	76.7704	30.1993	0.3483
2016-09-27 13:10:00	125.827	76.7721	30.29	0.3309
2016-09-27 13:20:00	125.828	76.7719	30.2623	0.5687
2016-09-27 13:30:00	125.831	76.7736	30.3119	0.4497
2016-09-27 13:40:00	125.839	76.7849	30.2795	0.2973
2016-09-27 13:50:00	125.853	76.7958	30.1679	0.4587
2016-09-27 14:00:00	125.844	76.7887	30.293	0.2993
2016-09-27 14:10:00	125.837	76.7757	30.3016	0.3442
2016-09-27 14:20:00	125.834	76.7633	30.3146	0.1825
2016-09-27 14:30:00	125.837	76.7556	30.2757	0.3005
2016-09-27 14:40:00	125.835	76.7525	30.1322	0.3138
2016-09-27 14:50:00	125.838	76.7658	30.0872	0.2403
2016-09-27 15:00:00	125.843	76.7795	30.0928	0.2177
2016-09-27 15:10:00	125.848	76.7934	30.1247	0.2128
2016-09-27 15:20:00	125.856	76.8026	30.1973	0.1724
2016-09-27 15:30:00	125.85	76.7895	30.2728	0.1373
2016-09-27 15:40:00	125.844	76.7755	30.33	0.1935
2016-09-27 15:50:00	125.84	76.7616	30.3705	0.1792
2016-09-27 16:00:00	125.843	76.7546	30.3784	0.1611
2016-09-27 16:10:00	125.846	76.7681	30.346	0.1416
2016-09-27 16:20:00	125.852	76.7826	30.3352	0.1737
2016-09-27 16:30:00	125.856	76.7964	30.371	0.1786
2016-09-27 16:40:00	125.861	76.8001	30.3955	0.1348
2016-09-27 16:50:00	125.855	76.7857	30.4279	0.106
2016-09-27 17:00:00	125.85	76.7712	30.4276	0.1528
2016-09-27 17:10:00	125.846	76.7576	30.4256	0.1627
2016-09-27 17:20:00	125.851	76.7584	30.3981	0.1579
2016-09-27 17:30:00	125.855	76.773	30.4003	0.1601
2016-09-27 17:40:00	125.86	76.7869	30.3902	0.1418
2016-09-27 17:50:00	125.863	76.801	30.4179	0.0987
2016-09-27 18:00:00	125.867	76.7957	30.4294	0.0699
2016-09-27 18:10:00	125.861	76.7815	30.4741	0.0845
2016-09-27 18:20:00	125.857	76.7675	30.4557	0.1118
2016-09-27 18:30:00	125.847	76.7544	30.4281	0.122
2016-09-27 18:40:00	125.858	76.7602	30.4032	0.1084
2016-09-27 18:50:00	125.862	76.7732	30.3871	0.1316
2016-09-27 19:00:00	125.867	76.7865	30.3997	0.113
2016-09-27 19:10:00	125.87	76.7997	30.424	0.0595
2016-09-27 19:20:00	125.877	76.7943	30.4368	0.0571
2016-09-27 19:30:00	125.87	76.7804	30.4758	0.0524
2016-09-27 19:40:00	125.864	76.7664	30.4561	0.0866
2016-09-27 19:50:00	125.854	76.7535	30.4344	0.0909
2016-09-27 20:00:00	125.868	76.7611	30.4084	0.0411
2016-09-27 20:10:00	125.872	76.7745	30.3461	0.0846
2016-09-27 20:20:00	125.877	76.7876	30.3779	0.0713
2016-09-27 20:30:00	125.883	76.8006	30.4138	0.0228
2016-09-27 20:40:00	125.887	76.7981	30.4418	0.0336
2016-09-27 20:50:00	125.881	76.7842	30.4893	0.0266
2016-09-27 21:00:00	125.876	76.7703	30.4718	0.0355
2016-09-27 21:10:00	125.872	76.7567	30.465	0.0417
2016-09-27 21:20:00	125.853	76.7635	30.3724	0.0591
2016-09-27 21:30:00	125.832	76.7739	30.2625	0.0708
2016-09-27 21:40:00	125.827	76.774	30.2521	0.0777
2016-09-27 21:50:00	125.827	76.7727	30.3129	0.077
2016-09-27 22:00:00	125.828	76.7714	30.2638	0.0884
2016-09-27 22:10:00	125.829	76.7701	30.1863	0.0973
2016-09-27 22:20:00	125.828	76.7687	30.1187	0.1007
2016-09-27 22:30:00	125.827	76.767	30.0442	0.1512
2016-09-27 22:40:00	125.791	76.7567	29.9813	0.2321
2016-09-27 22:50:00	125.775	76.7466	29.8939	0.3696
2016-09-27 23:00:00	125.822	76.7726	29.8484	0.3303
2016-09-27 23:10:00	125.874	76.7987	29.8759	0.1939
2016-09-27 23:20:00	125.866	76.7931	30.1994	0.0856
2016-09-27 23:30:00	125.849	76.7701	30.3449	0.081
2016-09-27 23:40:00	125.83	76.7659	30.1471	0.2184
2016-09-27 23:50:00	125.829	76.7718	29.9592	0.2674
2016-09-28	125.827	76.7719	29.9446	0.3226
2016-09-28 00:10:00	125.826	76.7733	29.9407	0.3315
2016-09-28 00:20:00	125.81	76.7739	29.9851	0.2291
2016-09-28 00:30:00	125.815	76.7597	29.9538	0.2403
2016-09-28 00:40:00	125.865	76.7541	29.9089	0.3012
2016-09-28 00:50:00	125.967	76.7617	29.8626	0.3293
2016-09-28 01:00:00	126.087	76.7706	29.9251	0.1352
2016-09-28 01:10:00	126.208	76.7793	29.9677	0.028
2016-09-28 01:20:00	126.33	76.7884	30.0132	-0.0008
2016-09-28 01:30:00	126.453	76.7972	29.9865	0.1161
2016-09-28 01:40:00	126.574	76.8062	29.9827	0.1325
2016-09-28 01:50:00	126.695	76.8149	29.8208	0.2173
2016-09-28 02:00:00	126.816	76.8235	29.6755	0.2576
2016-09-28 02:10:00	126.936	76.8322	29.5612	0.2908
2016-09-28 02:20:00	127.055	76.8409	29.4498	0.3758
2016-09-28 02:30:00	127.157	76.8481	29.4382	0.3415
2016-09-28 02:40:00	127.257	76.8548	29.394	0.3076
2016-09-28 02:50:00	127.355	76.8613	29.3743	0.3235
2016-09-28 03:00:00	127.455	76.8682	29.4108	0.3161
2016-09-28 03:10:00	127.562	76.8772	29.4233	0.2868
2016-09-28 03:20:00	127.672	76.8851	29.6269	0.2902
2016-09-28 03:30:00	127.762	76.8914	29.8027	0.1324
2016-09-28 03:40:00	127.797	76.8947	30.0663	-0.1937
2016-09-28 03:50:00	127.795	76.8925	0	-0.2911
2016-09-28 04:00:00	127.795	76.8905	30.1093	-0.2943
2016-09-28 04:10:00	127.794	76.8922	30.1008	-0.268
2016-09-28 04:20:00	127.797	76.8943	30.1644	-0.2359
2016-09-28 04:30:00	127.795	76.8932	30.2072	-0.2474
2016-09-28 04:40:00	127.796	76.8933	30.2246	-0.2094
2016-09-28 04:50:00	127.798	76.8933	30.2515	-0.1685
2016-09-28 05:00:00	127.799	76.8935	30.2755	-0.0989
2016-09-28 05:10:00	127.798	76.8942	30.275	-0.1675
2016-09-28 05:20:00	127.797	76.8942	30.2595	-0.1845
2016-09-28 05:30:00	127.801	76.8941	30.2965	-0.1878
2016-09-28 05:40:00	127.741	76.8934	30.2005	-0.2603
2016-09-28 05:50:00	127.783	76.8979	30.2208	-0.1051
2016-09-28 06:00:00	127.852	76.9005	30.2742	-0.1536
2016-09-28 06:10:00	127.862	76.9	30.2298	-0.2205
2016-09-28 06:20:00	127.795	76.8975	30.2319	-0.2774
2016-09-28 06:30:00	127.754	76.8952	30.228	-0.1811
2016-09-28 06:40:00	127.814	76.8973	30.2596	-0.1916
2016-09-28 06:50:00	127.878	76.9009	30.2537	-0.2309
2016-09-28 07:00:00	127.848	76.8978	30.2658	-0.3084
2016-09-28 07:10:00	127.787	76.8954	30.2343	-0.3293
2016-09-28 07:20:00	127.763	76.8934	30.2009	-0.1066
2016-09-28 07:30:00	127.833	76.8961	30.201	-0.1501
2016-09-28 07:40:00	127.889	76.8992	30.1811	-0.2529
2016-09-28 07:50:00	127.842	76.8958	30.2233	-0.3242
2016-09-28 08:00:00	127.776	76.8929	30.2154	-0.2042
2016-09-28 08:10:00	127.781	76.8922	30.1019	0.0639
2016-09-28 08:20:00	127.851	76.8949	30.1045	-0.0477
2016-09-28 08:30:00	127.891	76.8957	30.0941	-0.2598
2016-09-28 08:40:00	127.835	76.8935	30.0814	-0.3166
2016-09-28 08:50:00	127.776	76.8912	30.0735	-0.0498
2016-09-28 09:00:00	127.777	76.8901	30.0458	0.1114
2016-09-28 09:10:00	127.842	76.8925	29.9804	0.1408
2016-09-28 09:20:00	127.896	76.8958	30.0771	-0.1321
2016-09-28 09:30:00	127.853	76.8923	30.0634	-0.3113
2016-09-28 09:40:00	127.787	76.8896	30.0018	0.04
2016-09-28 09:50:00	127.756	76.8874	29.9943	0.1454
2016-09-28 10:00:00	127.759	76.8862	29.904	0.183
2016-09-28 10:10:00	127.776	76.8881	29.8679	0.2015
2016-09-28 10:20:00	127.843	76.891	29.8674	0.176
2016-09-28 10:30:00	127.904	76.8938	29.8871	0.1577
2016-09-28 10:40:00	127.866	76.8912	29.8772	0.063
2016-09-28 10:50:00	127.809	76.8889	29.8953	0.1395
2016-09-28 11:00:00	127.76	76.8862	29.9116	0.1779
2016-09-28 11:10:00	127.823	76.8884	29.8923	0.1864
2016-09-28 11:20:00	127.888	76.8914	29.8908	0.1589
2016-09-28 11:30:00	127.855	76.8874	29.872	0.1855
2016-09-28 11:40:00	127.8	76.8874	29.8934	0.1895
2016-09-28 11:50:00	127.766	76.8984	29.8929	0.1617
2016-09-28 12:00:00	127.8	76.8897	29.7392	0.2026
2016-09-28 12:10:00	127.811	76.8878	29.6732	0.163
2016-09-28 12:20:00	127.778	76.8985	29.6801	0.1727
2016-09-28 12:30:00	127.804	76.8931	29.6345	0.2016
2016-09-28 12:40:00	127.825	76.882	29.5828	0.1871
2016-09-28 12:50:00	127.807	76.8936	29.5846	0.172
2016-09-28 13:00:00	127.8	76.9003	29.5887	0.1601
2016-09-28 13:10:00	127.824	76.8885	29.5664	0.1535
2016-09-28 13:20:00	127.835	76.8866	29.5282	0.1904
2016-09-28 13:30:00	127.809	76.8996	29.535	0.1729
2016-09-28 13:40:00	127.804	76.8924	29.5362	0.118
2016-09-28 13:50:00	127.821	76.8781	29.5308	0.1687
2016-09-28 14:00:00	127.837	76.8631	29.5094	0.1877
2016-09-28 14:10:00	127.861	76.8549	29.5237	0.1376
2016-09-28 14:20:00	127.863	76.8668	29.5047	0.136
2016-09-28 14:30:00	127.863	76.8802	29.5557	0.1672
2016-09-28 14:40:00	127.848	76.8906	29.5499	0.1709
2016-09-28 14:50:00	127.818	76.895	29.5318	0.1253
2016-09-28 15:00:00	127.808	76.8994	29.4938	0.1553
2016-09-28 15:10:00	127.838	76.8975	29.5143	0.2003
2016-09-28 15:20:00	127.855	76.8941	29.5632	0.2371
2016-09-28 15:30:00	127.872	76.8932	29.6073	0.2241
2016-09-28 15:40:00	127.887	76.8941	29.5914	0.2365
2016-09-28 15:50:00	127.908	76.8959	29.6023	0.2887
2016-09-28 16:00:00	127.883	76.8971	29.6237	0.314
2016-09-28 16:10:00	127.857	76.8982	29.7009	0.2868
2016-09-28 16:20:00	127.866	76.8975	29.6363	0.2968
2016-09-28 16:30:00	127.855	76.8979	29.6323	0.2713
2016-09-28 16:40:00	127.855	76.8983	0	0.2931
2016-09-28 16:50:00	127.852	76.8981	29.6578	0.2658
2016-09-28 17:00:00	127.83	76.8969	29.6752	0.2336
2016-09-28 17:10:00	127.814	76.8961	29.7298	0.1774
2016-09-28 17:20:00	127.818	76.8975	29.7026	0.0899
2016-09-28 17:30:00	127.817	76.8966	29.7105	0.0569
2016-09-28 17:40:00	127.816	76.8962	29.6477	0.1904
2016-09-28 17:50:00	127.816	76.8965	29.7864	0.1557
2016-09-28 18:00:00	127.818	76.897	29.83	0.1489
2016-09-28 18:10:00	127.817	76.8943	29.8359	0.3171
2016-09-28 18:20:00	127.802	76.8932	29.8127	0.4852
2016-09-28 18:30:00	127.802	76.8932	29.7836	0.3347
2016-09-28 18:40:00	127.807	76.8936	29.7958	0.2762
2016-09-28 18:50:00	127.818	76.8942	29.7743	0.3005
2016-09-28 19:00:00	127.804	76.8935	29.7617	0.2496
2016-09-28 19:10:00	127.792	76.8928	29.7667	0.2757
2016-09-28 19:20:00	127.792	76.8928	29.7706	0.2264
2016-09-28 19:30:00	127.8	76.8935	29.8097	0.193
2016-09-28 19:40:00	127.817	76.8929	29.7928	0.1276
2016-09-28 19:50:00	127.833	76.8976	29.7772	0.1377
2016-09-28 20:00:00	127.843	76.8996	29.7432	0.1413
2016-09-28 20:10:00	127.863	76.8989	29.7558	0.2144
2016-09-28 20:20:00	127.882	76.8974	29.7347	0.1009
2016-09-28 20:30:00	127.9	76.896	29.7389	0.1139
2016-09-28 20:40:00	127.919	76.8949	29.7302	0.1577
2016-09-28 20:50:00	127.937	76.8938	29.7364	0.0876
2016-09-28 21:00:00	127.957	76.8928	29.7209	0.1065
2016-09-28 21:10:00	127.947	76.8944	29.7243	0.066
2016-09-28 21:20:00	127.906	76.8941	29.7144	0.1185
2016-09-28 21:30:00	127.859	76.8935	29.725	0.1197
2016-09-28 21:40:00	127.811	76.8929	29.742	0.0748
2016-09-28 21:50:00	127.824	76.8931	29.7962	-0.0031
2016-09-28 22:00:00	127.84	76.8954	29.8046	-0.0598
2016-09-28 22:10:00	127.855	76.898	29.7958	-0.0047
2016-09-28 22:20:00	127.882	76.8991	29.7862	0.0627
2016-09-28 22:30:00	127.947	76.9125	29.7844	0.0583
2016-09-28 22:40:00	128.031	76.9342	29.8223	-0.0494
2016-09-28 22:50:00	128.094	76.9571	30.0148	-0.124
2016-09-28 23:00:00	128.015	76.9412	30.083	-0.11
2016-09-28 23:10:00	127.939	76.9243	30.2542	-0.2931
2016-09-28 23:20:00	127.875	76.9106	30.0576	-0.0487
2016-09-28 23:30:00	127.825	76.8999	29.9269	0.0096
2016-09-28 23:40:00	127.798	76.8933	29.8835	0.1007
2016-09-28 23:50:00	127.794	76.8932	29.8804	0.2157
2016-09-29	127.796	76.8933	29.853	0.258
2016-09-29 00:10:00	127.796	76.893	29.8279	0.3325
2016-09-29 00:20:00	127.795	76.8929	29.801	0.3082
2016-09-29 00:30:00	127.794	76.8937	29.8	0.3459
2016-09-29 00:40:00	127.794	76.894	29.7685	0.4157
2016-09-29 00:50:00	127.795	76.8942	29.7554	0.6135
2016-09-29 01:00:00	127.794	76.8936	29.7805	0.5216
2016-09-29 01:10:00	127.793	76.8926	29.7995	0.5091
2016-09-29 01:20:00	127.829	76.8876	29.8779	0.3995
2016-09-29 01:30:00	127.9	76.8716	29.7575	0.2751
2016-09-29 01:40:00	127.975	76.8555	29.5961	0.244
2016-09-29 01:50:00	128.051	76.8394	29.4621	0.2212
2016-09-29 02:00:00	128.124	76.823	29.4287	0.3756
2016-09-29 02:10:00	128.196	76.8069	29.454	0.2053
2016-09-29 02:20:00	128.266	76.7903	29.6429	0.2176
2016-09-29 02:30:00	128.333	76.7728	29.727	0.1378
2016-09-29 02:40:00	128.387	76.7485	29.9062	0.0008
2016-09-29 02:50:00	128.462	76.7266	30.0042	-0.0601
2016-09-29 03:00:00	128.544	76.7043	30.0505	-0.1178
2016-09-29 03:10:00	128.626	76.6819	30.1094	-0.0736
2016-09-29 03:20:00	128.71	76.6592	30.0201	-0.0013
2016-09-29 03:30:00	128.793	76.6361	29.8052	0.2474
2016-09-29 03:40:00	128.878	76.6125	29.6114	0.1575
2016-09-29 03:50:00	128.965	76.5891	29.4816	0.2003
2016-09-29 04:00:00	129.051	76.5654	29.5434	0.0044
2016-09-29 04:10:00	129.137	76.5413	29.4418	-0.0158
2016-09-29 04:20:00	129.225	76.5175	29.4309	-0.0161
2016-09-29 04:30:00	129.31	76.4939	29.3329	-0.107
2016-09-29 04:40:00	129.392	76.4707	29.2107	-0.1043
2016-09-29 04:50:00	129.475	76.4479	29.1686	-0.136
2016-09-29 05:00:00	129.557	76.4251	29.2543	-0.1303
2016-09-29 05:10:00	129.639	76.4028	29.4084	-0.2757
2016-09-29 05:20:00	129.72	76.3801	29.2424	-0.2635
2016-09-29 05:30:00	129.8	76.3571	29.1003	-0.1455
2016-09-29 05:40:00	129.875	76.3367	29.084	-0.256
2016-09-29 05:50:00	129.907	76.3292	29.1	-0.2745
2016-09-29 06:00:00	129.923	76.331	0	-0.2768
2016-09-29 06:10:00	129.941	76.332	29.1492	-0.2954
2016-09-29 06:20:00	129.96	76.3325	29.1965	-0.288
2016-09-29 06:30:00	129.977	76.3339	29.1831	-0.2424
2016-09-29 06:40:00	129.98	76.3332	29.1862	-0.1946
2016-09-29 06:50:00	129.997	76.3269	29.2412	-0.223
2016-09-29 07:00:00	130.064	76.3067	29.2057	-0.2496
2016-09-29 07:10:00	130.138	76.284	29.2355	-0.2711
2016-09-29 07:20:00	130.214	76.2603	29.2597	-0.2991
2016-09-29 07:30:00	130.288	76.2367	29.2693	-0.2865
2016-09-29 07:40:00	130.362	76.213	29.3097	-0.4345
2016-09-29 07:50:00	130.442	76.1875	29.2283	-0.7168
2016-09-29 08:00:00	130.518	76.1641	29.0529	-0.86
2016-09-29 08:10:00	130.591	76.1406	28.9106	-0.9132
2016-09-29 08:20:00	130.664	76.117	28.8155	-0.8695
2016-09-29 08:30:00	130.737	76.0936	28.7468	-0.8395
2016-09-29 08:40:00	130.795	76.0757	28.7374	-0.7515
2016-09-29 08:50:00	130.814	76.0713	28.6612	-0.6312
2016-09-29 09:00:00	130.832	76.0717	28.8052	-0.6454
2016-09-29 09:10:00	130.877	76.0579	28.7961	-0.5881
2016-09-29 09:20:00	130.95	76.0367	28.8309	-0.6223
2016-09-29 09:30:00	131.023	76.0146	28.7729	-0.5279
2016-09-29 09:40:00	131.098	75.992	28.7121	-0.4211
2016-09-29 09:50:00	131.173	75.9687	28.6153	-0.4012
2016-09-29 10:00:00	131.25	75.9454	28.6012	-0.3738
2016-09-29 10:10:00	131.328	75.9216	28.6059	-0.4124
2016-09-29 10:20:00	131.408	75.8977	28.629	-0.4535
2016-09-29 10:30:00	131.489	75.8745	28.7179	-0.4117
2016-09-29 10:40:00	131.566	75.8506	28.8425	-0.4
2016-09-29 10:50:00	131.643	75.8267	28.9737	-0.5366
2016-09-29 11:00:00	131.719	75.803	28.8557	-0.5889
2016-09-29 11:10:00	131.792	75.7806	28.4889	-0.5984
2016-09-29 11:20:00	131.834	75.7678	28.2969	-0.5939
2016-09-29 11:30:00	131.854	75.7676	28.2238	-0.6017
2016-09-29 11:40:00	131.87	75.7657	28.144	-0.5542
2016-09-29 11:50:00	131.876	75.7624	28.1187	-0.5297
2016-09-29 12:00:00	131.874	75.7623	28.093	-0.5256
2016-09-29 12:10:00	131.93	75.7531	28.09	-0.5516
2016-09-29 12:20:00	132.032	75.741	28.0228	-0.5365
2016-09-29 12:30:00	132.144	75.7274	27.9572	-0.4963
2016-09-29 12:40:00	132.257	75.7135	27.9148	-0.5428
2016-09-29 12:50:00	132.371	75.6997	27.8612	-0.5426
2016-09-29 13:00:00	132.487	75.686	27.8575	-0.5821
2016-09-29 13:10:00	132.603	75.672	27.9088	-0.5752
2016-09-29 13:20:00	132.719	75.6578	28.0391	-0.5919
2016-09-29 13:30:00	132.832	75.644	28.1099	-0.5851
2016-09-29 13:40:00	132.945	75.6304	28.1306	-0.5979
2016-09-29 13:50:00	133.058	75.617	28.3516	-0.5897
2016-09-29 14:00:00	133.168	75.6035	28.6723	-0.4498
2016-09-29 14:10:00	133.272	75.591	28.8764	-0.2954
2016-09-29 14:20:00	133.316	75.586	28.9172	-0.2501
2016-09-29 14:30:00	133.331	75.5856	29.0041	-0.1986
2016-09-29 14:40:00	133.393	75.5763	29.0602	-0.169
2016-09-29 14:50:00	133.484	75.5647	29.1062	-0.0665
2016-09-29 15:00:00	133.582	75.5528	29.2011	-0.0413
2016-09-29 15:10:00	133.679	75.5405	29.2757	-0.0247
2016-09-29 15:20:00	133.779	75.5279	29.3341	0.0019
2016-09-29 15:30:00	133.876	75.516	29.4575	-0.0519
2016-09-29 15:40:00	133.976	75.5036	29.367	-0.0917
2016-09-29 15:50:00	134.074	75.4911	29.1627	-0.1187
2016-09-29 16:00:00	134.175	75.4784	28.9313	-0.1961
2016-09-29 16:10:00	134.276	75.4661	28.5711	-0.2278
2016-09-29 16:20:00	134.376	75.4537	28.2113	-0.263
2016-09-29 16:30:00	134.474	75.4411	27.6993	-0.3059
2016-09-29 16:40:00	134.574	75.4287	27.4103	-0.325
2016-09-29 16:50:00	134.668	75.4168	27.1248	-0.3614
2016-09-29 17:00:00	134.726	75.4093	26.8676	-0.3474
2016-09-29 17:10:00	134.74	75.4076	26.7508	-0.17
2016-09-29 17:20:00	134.741	75.4093	26.796	-0.0833
2016-09-29 17:30:00	134.742	75.4092	26.7827	-0.0158
2016-09-29 17:40:00	134.743	75.4085	26.7806	-0.0046
2016-09-29 17:50:00	134.744	75.408	26.7679	0.0105
2016-09-29 18:00:00	134.747	75.4057	26.8119	-0.0711
2016-09-29 18:10:00	134.757	75.3882	26.7739	-0.0609
2016-09-29 18:20:00	134.775	75.3637	26.7647	-0.066
2016-09-29 18:30:00	134.795	75.338	26.7626	-0.0526
2016-09-29 18:40:00	134.814	75.3119	26.7829	-0.1227
2016-09-29 18:50:00	134.832	75.2858	26.7824	-0.2028
2016-09-29 19:00:00	134.85	75.2598	26.7795	-0.2191
2016-09-29 19:10:00	134.87	75.2339	26.6368	-0.1601
2016-09-29 19:20:00	134.89	75.2079	26.5589	-0.2208
2016-09-29 19:30:00	134.91	75.1819	26.5842	-0.4017
2016-09-29 19:40:00	134.928	75.1558	26.5606	-0.476
2016-09-29 19:50:00	134.946	75.1298	26.5794	-0.4423
2016-09-29 20:00:00	134.964	75.1065	26.8653	-0.3622
2016-09-29 20:10:00	134.969	75.0949	26.9488	-0.3752
2016-09-29 20:20:00	134.98	75.0962	26.9379	-0.4346
2016-09-29 20:30:00	134.991	75.0842	26.8362	-0.3373
2016-09-29 20:40:00	135.009	75.0596	26.7162	-0.3284
2016-09-29 20:50:00	135.028	75.0331	26.693	-0.3337
2016-09-29 21:00:00	135.046	75.0062	26.6462	-0.2543
2016-09-29 21:10:00	135.066	74.979	26.6117	-0.4118
2016-09-29 21:20:00	135.085	74.9526	26.5797	-0.3275
2016-09-29 21:30:00	135.104	74.9256	26.6222	-0.2525
2016-09-29 21:40:00	135.12	74.8988	26.4445	-0.2069
2016-09-29 21:50:00	135.14	74.8724	26.3578	-0.22
2016-09-29 22:00:00	135.159	74.8453	26.2624	-0.1111
2016-09-29 22:10:00	135.177	74.8183	26.1012	-0.0407
2016-09-29 22:20:00	135.198	74.7918	26.0201	-0.0073
2016-09-29 22:30:00	135.21	74.7705	25.9886	-0.0494
2016-09-29 22:40:00	135.214	74.7632	25.945	0.0845
2016-09-29 22:50:00	135.213	74.7639	25.9671	0.1143
2016-09-29 23:00:00	135.21	74.7639	25.9656	0.195
2016-09-29 23:10:00	135.208	74.764	25.9707	0.1394
2016-09-29 23:20:00	135.237	74.7512	25.9975	0.1084
2016-09-29 23:30:00	135.308	74.7296	25.5312	0.2283
2016-09-29 23:40:00	135.379	74.7067	24.6204	0.4364
2016-09-29 23:50:00	135.451	74.6835	24.0198	0.5709
2016-09-30	135.521	74.661	23.3068	0.8171
2016-09-30 00:10:00	135.592	74.6383	22.3389	0.9833
2016-09-30 00:20:00	135.662	74.6152	22.0075	1.0219
2016-09-30 00:30:00	135.723	74.5958	21.8753	1.0648
2016-09-30 00:40:00	135.748	74.5878	21.8381	1.0306
2016-09-30 00:50:00	135.763	74.5863	21.8307	1.002
2016-09-30 01:00:00	135.795	74.5752	21.8385	0.982
2016-09-30 01:10:00	135.829	74.5639	21.8418	1.0175
2016-09-30 01:20:00	135.861	74.5524	21.8478	0.9917
2016-09-30 01:30:00	135.894	74.5409	21.8239	1.0242
2016-09-30 01:40:00	135.927	74.5298	21.7762	1.0167
2016-09-30 01:50:00	135.959	74.5188	21.7196	1.0135
2016-09-30 02:00:00	135.99	74.5081	21.6934	1.0149
2016-09-30 02:10:00	136.021	74.498	21.7028	0.9785
2016-09-30 02:20:00	136.051	74.488	21.7004	0.9701
2016-09-30 02:30:00	136.066	74.4844	21.898	0.9958
2016-09-30 02:40:00	136.075	74.484	22.058	1.0064
2016-09-30 02:50:00	136.109	74.4687	22.1199	1.0732
2016-09-30 03:00:00	136.172	74.4482	22.1636	1.0832
2016-09-30 03:10:00	136.234	74.4271	22.151	1.0908
2016-09-30 03:20:00	136.282	74.4119	22.1099	1.104
2016-09-30 03:30:00	136.292	74.4094	22.0565	1.1078
2016-09-30 03:40:00	136.304	74.407	22.0282	1.0847
2016-09-30 03:50:00	136.35	74.3889	22.033	1.0072
2016-09-30 04:00:00	136.414	74.3686	22.0174	0.9928
2016-09-30 04:10:00	136.48	74.3462	22.0214	1.049
2016-09-30 04:20:00	136.549	74.3236	21.8909	1.1552
2016-09-30 04:30:00	136.618	74.3004	21.7841	1.2074
2016-09-30 04:40:00	136.688	74.2769	21.5444	1.2332
2016-09-30 04:50:00	136.76	74.2529	21.08	1.3253
2016-09-30 05:00:00	136.831	74.2293	20.4034	1.3121
2016-09-30 05:10:00	136.901	74.2059	19.5259	1.3525
2016-09-30 05:20:00	136.971	74.1826	19.3831	1.3001
2016-09-30 05:30:00	137.039	74.1598	19.6192	1.3018
2016-09-30 05:40:00	137.092	74.1418	19.89	1.3165
2016-09-30 05:50:00	137.107	74.1378	20.0413	1.2904
2016-09-30 06:00:00	137.115	74.1373	20.1587	1.2993
2016-09-30 06:10:00	137.113	74.1374	20.181	1.3574
2016-09-30 06:20:00	137.133	74.1305	20.2376	1.3685
2016-09-30 06:30:00	137.195	74.1113	20.2796	1.2767
2016-09-30 06:40:00	137.274	74.0874	20.7396	1.2375
2016-09-30 06:50:00	137.345	74.0644	20.69	1.3617
2016-09-30 07:00:00	137.417	74.042	20.474	1.4308
2016-09-30 07:10:00	137.489	74.0188	19.9844	1.4714
2016-09-30 07:20:00	137.561	73.9958	19.9329	1.447
2016-09-30 07:30:00	137.634	73.9733	19.9286	1.5315
2016-09-30 07:40:00	137.704	73.9511	19.8966	1.6561
2016-09-30 07:50:00	137.774	73.9292	19.4629	1.7613
2016-09-30 08:00:00	137.845	73.9064	17.5043	1.8907
2016-09-30 08:10:00	137.915	73.8836	16.2165	1.9316
2016-09-30 08:20:00	137.971	73.8662	15.7449	1.9477
2016-09-30 08:30:00	137.993	73.8589	15.5966	1.9629
2016-09-30 08:40:00	138.003	73.8569	15.5524	1.947
2016-09-30 08:50:00	138.047	73.8425	15.5355	1.9215
2016-09-30 09:00:00	138.116	73.8201	15.546	1.8758
2016-09-30 09:10:00	138.185	73.7971	15.8974	1.7352
2016-09-30 09:20:00	138.254	73.7745	16.0169	1.7981
2016-09-30 09:30:00	138.321	73.7514	15.5769	1.8863
2016-09-30 09:40:00	138.389	73.7288	15.2151	1.9474
2016-09-30 09:50:00	138.456	73.7064	15.0586	2.0128
2016-09-30 10:00:00	138.523	73.6839	14.715	2.0034
2016-09-30 10:10:00	138.59	73.6611	14.5015	2.0047
2016-09-30 10:20:00	138.658	73.6383	14.3954	1.9848
2016-09-30 10:30:00	138.726	73.6151	14.2986	1.9222
2016-09-30 10:40:00	138.796	73.5916	14.2646	1.7857
2016-09-30 10:50:00	138.864	73.5694	16.197	1.7184
2016-09-30 11:00:00	138.912	73.5531	16.4916	1.7085
2016-09-30 11:10:00	138.924	73.5484	16.925	1.6881
2016-09-30 11:20:00	138.925	73.5467	17.1736	1.6783
2016-09-30 11:30:00	138.924	73.547	17.3703	1.6749
2016-09-30 11:40:00	138.932	73.5466	17.4448	1.6351
2016-09-30 11:50:00	138.943	73.5264	17.4544	1.6396
2016-09-30 12:00:00	138.982	73.5007	17.4704	1.5901
2016-09-30 12:10:00	139.029	73.4749	17.9783	0.9483
2016-09-30 12:20:00	139.077	73.4488	17.3824	0.5408
2016-09-30 12:30:00	139.125	73.4226	17.3479	0.3819
2016-09-30 12:40:00	139.17	73.3972	15.9586	1.075
2016-09-30 12:50:00	139.215	73.3719	15.2517	1.0856
2016-09-30 13:00:00	139.26	73.3466	15.1938	1.5013
2016-09-30 13:10:00	139.303	73.3215	15.2775	1.6202
2016-09-30 13:20:00	139.347	73.2968	13.9152	1.8359
2016-09-30 13:30:00	139.392	73.2717	13.5726	1.8777
2016-09-30 13:40:00	139.458	73.2555	13.3756	1.9474
2016-09-30 13:50:00	139.554	73.2518	13.388	1.7983
2016-09-30 14:00:00	139.649	73.2481	13.7723	1.6267
2016-09-30 14:10:00	139.744	73.2446	13.8633	1.7393
2016-09-30 14:20:00	139.836	73.2413	13.8744	1.854
2016-09-30 14:30:00	139.931	73.2376	13.6395	1.9254
2016-09-30 14:40:00	140.025	73.234	13.3545	1.929
2016-09-30 14:50:00	140.119	73.2305	13.1611	1.8389
2016-09-30 15:00:00	140.212	73.227	13.1314	1.7635
2016-09-30 15:10:00	140.305	73.2235	13.1551	1.7684
2016-09-30 15:20:00	140.402	73.2199	13.175	1.6217
2016-09-30 15:30:00	140.499	73.216	13.4636	1.6492
2016-09-30 15:40:00	140.588	73.2129	14.6685	1.1234
2016-09-30 15:50:00	140.651	73.2107	15.5838	1.2051
2016-09-30 16:00:00	140.657	73.21	15.7056	1.2762
2016-09-30 16:10:00	140.654	73.208	15.5604	1.3179
2016-09-30 16:20:00	140.68	73.2093	15.4733	1.3657
2016-09-30 16:30:00	140.725	73.206	15.1162	1.4698
2016-09-30 16:40:00	140.771	73.203	14.9841	1.3329
2016-09-30 16:50:00	140.819	73.1995	14.6573	1.5881
2016-09-30 17:00:00	140.865	73.1966	14.0302	1.626
2016-09-30 17:10:00	140.909	73.1938	15.0283	0.4567
2016-09-30 17:20:00	140.952	73.1908	16.4283	0.2848
2016-09-30 17:30:00	140.998	73.188	17.1369	0.4434
2016-09-30 17:40:00	141.042	73.185	17.3482	0.453
2016-09-30 17:50:00	141.074	73.1836	17.4266	0.4779
2016-09-30 18:00:00	141.067	73.1817	17.6367	0.6572
2016-09-30 18:10:00	141.058	73.1795	17.7484	0.7403
2016-09-30 18:20:00	141.017	73.1809	17.6945	0.9969
2016-09-30 18:30:00	140.963	73.1875	17.7325	0.5326
2016-09-30 18:40:00	140.936	73.1909	17.612	0.3879
2016-09-30 18:50:00	140.929	73.1886	17.4941	0.3753
2016-09-30 19:00:00	140.924	73.1865	17.4725	0.3883
2016-09-30 19:10:00	140.917	73.1847	17.4642	0.4635
2016-09-30 19:20:00	140.91	73.1852	17.7172	0.6862
2016-09-30 19:30:00	140.894	73.1848	17.8173	0.5799
2016-09-30 19:40:00	140.868	73.1647	17.7597	0.6258
2016-09-30 19:50:00	140.837	73.1353	17.8873	0.8332
2016-09-30 20:00:00	140.801	73.1058	15.6642	1.5639
2016-09-30 20:10:00	140.768	73.0772	14.5199	1.663
2016-09-30 20:20:00	140.735	73.0487	13.9103	1.8568
2016-09-30 20:30:00	140.705	73.0206	13.8238	1.8204
2016-09-30 20:40:00	140.675	72.9929	14.1694	1.9649
2016-09-30 20:50:00	140.641	72.9651	13.9675	2.0099
2016-09-30 21:00:00	140.61	72.9372	13.3948	1.9115
2016-09-30 21:10:00	140.591	72.9196	12.498	1.6782
2016-09-30 21:20:00	140.583	72.9133	11.2733	1.5308
2016-09-30 21:30:00	140.579	72.9099	10.9511	1.5075
2016-09-30 21:40:00	140.575	72.9065	10.8738	1.4952
2016-09-30 21:50:00	140.567	72.9128	10.8653	1.4653
2016-09-30 22:00:00	140.587	72.9121	10.8547	1.522
2016-09-30 22:10:00	140.604	72.8989	10.8761	1.5186
2016-09-30 22:20:00	140.621	72.8864	10.9015	1.4206
2016-09-30 22:30:00	140.639	72.8727	10.9581	1.1898
2016-09-30 22:40:00	140.636	72.8675	10.8819	0.9478
2016-09-30 22:50:00	140.633	72.8731	10.6285	0.8277
2016-09-30 23:00:00	140.617	72.8852	10.5754	0.8224
2016-09-30 23:10:00	140.601	72.8977	10.5538	1.0693
2016-09-30 23:20:00	140.585	72.9098	10.7511	1.306
2016-09-30 23:30:00	140.591	72.9135	10.7897	1.4625
2016-09-30 23:40:00	140.608	72.9003	10.8965	1.417
2016-09-30 23:50:00	140.625	72.8867	10.9765	1.3212
2016-10-01	140.644	72.873	11.0186	1.0468
2016-10-01 00:10:00	140.622	72.8703	10.7544	0.6961
2016-10-01 00:20:00	140.576	72.8645	10.5968	0.7564
2016-10-01 00:30:00	140.579	72.8653	10.5859	0.9758
2016-10-01 00:40:00	140.604	72.8766	11.1412	0.9213
2016-10-01 00:50:00	140.631	72.8885	10.9325	0.9199
2016-10-01 01:00:00	140.655	72.899	10.8877	1.0892
2016-10-01 01:10:00	140.636	72.8942	10.9104	1.1589
2016-10-01 01:20:00	140.609	72.882	10.9758	1.0796
2016-10-01 01:30:00	140.582	72.8697	11.0275	1.0409
2016-10-01 01:40:00	140.565	72.8608	10.978	0.9029
2016-10-01 01:50:00	140.589	72.8712	11.1595	0.9762
2016-10-01 02:00:00	140.615	72.8829	11.122	0.8696
2016-10-01 02:10:00	140.641	72.8947	10.8807	0.9283
2016-10-01 02:20:00	140.649	72.9058	10.8345	1.2846
2016-10-01 02:30:00	140.631	72.8982	10.9036	1.4067
2016-10-01 02:40:00	140.62	72.8843	10.9474	1.2738
2016-10-01 02:50:00	140.608	72.8714	10.9752	1.0458
2016-10-01 03:00:00	140.589	72.8607	10.848	0.7399
2016-10-01 03:10:00	140.604	72.8689	10.648	0.7057
2016-10-01 03:20:00	140.617	72.8813	10.6282	0.7981
2016-10-01 03:30:00	140.613	72.8849	10.6564	1.15
2016-10-01 03:40:00	140.605	72.8853	13.0172	1.514
2016-10-01 03:50:00	140.612	72.8851	11.5589	1.435
2016-10-01 04:00:00	140.619	72.8852	11.2098	1.2144
2016-10-01 04:10:00	140.622	72.8856	11.0966	1.1779
2016-10-01 04:20:00	140.625	72.8846	11.0736	1.0347
2016-10-01 04:30:00	140.64	72.8722	10.9881	0.9852
2016-10-01 04:40:00	140.643	72.8658	10.835	0.729
2016-10-01 04:50:00	140.632	72.8785	10.641	0.7687
2016-10-01 05:00:00	140.614	72.8915	10.5986	1.0434
2016-10-01 05:10:00	140.597	72.9046	10.8519	1.4643
2016-10-01 05:20:00	140.589	72.9155	10.982	1.5344
2016-10-01 05:30:00	140.619	72.9065	10.9933	1.5948
2016-10-01 05:40:00	140.62	72.8925	11.1202	1.6387
2016-10-01 05:50:00	140.622	72.8784	11.2412	1.3983
2016-10-01 06:00:00	140.61	72.8757	11.1698	1.0279
2016-10-01 06:10:00	140.629	72.8834	11.0009	0.9246
2016-10-01 06:20:00	140.614	72.8965	10.9109	1.3439
2016-10-01 06:30:00	140.6	72.906	11.0439	1.5964
2016-10-01 06:40:00	140.642	72.8986	11.2255	1.683
2016-10-01 06:50:00	140.657	72.8862	11.3561	1.5362
2016-10-01 07:00:00	140.626	72.8926	11.2707	1.435
2016-10-01 07:10:00	140.603	72.8925	11.2107	1.6132
2016-10-01 07:20:00	140.635	72.8828	11.2649	1.5324
2016-10-01 07:30:00	140.627	72.8749	11.2938	1.2251
2016-10-01 07:40:00	140.587	72.8841	11.1642	1.3779
2016-10-01 07:50:00	140.599	72.8741	11.1916	1.4353
2016-10-01 08:00:00	140.602	72.8643	11.2686	1.1815
2016-10-01 08:10:00	140.571	72.8703	11.2055	1.2737
2016-10-01 08:20:00	140.558	72.8639	11.1997	1.3553
2016-10-01 08:30:00	140.525	72.8597	11.2524	1.342
2016-10-01 08:40:00	140.428	72.8624	11.5696	1.6007
2016-10-01 08:50:00	140.337	72.8681	12.5524	1.7206
2016-10-01 09:00:00	140.24	72.8675	12.4625	1.6109
2016-10-01 09:10:00	140.143	72.8669	12.0733	1.52
2016-10-01 09:20:00	140.043	72.8664	11.9322	1.5922
2016-10-01 09:30:00	139.944	72.8661	11.9168	1.5988
2016-10-01 09:40:00	139.846	72.8656	11.698	1.4379
2016-10-01 09:50:00	139.755	72.8692	11.3176	1.4653
2016-10-01 10:00:00	139.655	72.8681	11.2803	1.6417
2016-10-01 10:10:00	139.556	72.8677	11.5116	1.6879
2016-10-01 10:20:00	139.46	72.868	11.6608	1.7419
2016-10-01 10:30:00	139.366	72.8672	11.7978	1.7352
2016-10-01 10:40:00	139.27	72.8665	12.0897	1.8046
2016-10-01 10:50:00	139.176	72.8665	12.6698	1.9118
2016-10-01 11:00:00	139.083	72.8659	13.0935	1.9153
2016-10-01 11:10:00	138.99	72.8656	13.5013	1.9667
2016-10-01 11:20:00	138.898	72.8648	13.7524	1.9246
2016-10-01 11:30:00	138.806	72.8641	13.8296	1.9136
2016-10-01 11:40:00	138.717	72.8641	13.8662	1.897
2016-10-01 11:50:00	138.626	72.8646	13.921	1.9017
2016-10-01 12:00:00	138.539	72.8639	14.0037	2.0472
2016-10-01 12:10:00	138.45	72.8633	13.9507	2.0169
2016-10-01 12:20:00	138.359	72.862	13.7745	2.0475
2016-10-01 12:30:00	138.269	72.862	13.7447	2.039
2016-10-01 12:40:00	138.176	72.8621	13.5127	2.0216
2016-10-01 12:50:00	138.081	72.8617	13.4635	2.012
2016-10-01 13:00:00	137.988	72.8614	13.4778	1.9891
2016-10-01 13:10:00	137.893	72.8606	13.3034	2.1421
2016-10-01 13:20:00	137.802	72.8598	13.1934	2.0827
2016-10-01 13:30:00	137.712	72.8595	11.9846	2.6098
2016-10-01 13:40:00	137.619	72.8597	11.1848	2.7739
2016-10-01 13:50:00	137.523	72.8592	10.809	2.9085
2016-10-01 14:00:00	137.427	72.8584	10.5405	2.9129
2016-10-01 14:10:00	137.335	72.8579	10.5092	2.907
2016-10-01 14:20:00	137.245	72.8576	10.4898	2.9089
2016-10-01 14:30:00	137.156	72.8571	10.5761	2.9252
2016-10-01 14:40:00	137.07	72.8568	10.5454	2.9033
2016-10-01 14:50:00	136.981	72.8564	10.4278	2.7802
2016-10-01 15:00:00	136.896	72.8561	10.8087	2.7522
2016-10-01 15:10:00	136.81	72.8556	11.0712	2.6377
2016-10-01 15:20:00	136.725	72.855	11.1339	2.5426
2016-10-01 15:30:00	136.637	72.8549	11.1379	2.3989
2016-10-01 15:40:00	136.549	72.8546	11.1298	2.3488
2016-10-01 15:50:00	136.46	72.8536	11.2122	2.3043
2016-10-01 16:00:00	136.374	72.8535	11.5098	2.3875
2016-10-01 16:10:00	136.288	72.8537	11.5615	2.4318
2016-10-01 16:20:00	136.2	72.8538	11.4346	2.4205
2016-10-01 16:30:00	136.111	72.8527	11.401	2.3623
2016-10-01 16:40:00	136.023	72.852	11.5897	2.2595
2016-10-01 16:50:00	135.936	72.8519	11.6457	2.3448
2016-10-01 17:00:00	135.849	72.851	11.5819	2.3229
2016-10-01 17:10:00	135.764	72.8509	11.5493	2.2916
2016-10-01 17:20:00	135.677	72.8507	11.5465	2.1941
2016-10-01 17:30:00	135.59	72.85	11.5612	2.0995
2016-10-01 17:40:00	135.503	72.85	11.8379	2.1282
2016-10-01 17:50:00	135.416	72.8501	12.038	2.1148
2016-10-01 18:00:00	135.328	72.8489	12.188	2.0371
2016-10-01 18:10:00	135.241	72.8487	12.2643	2.0212
2016-10-01 18:20:00	135.154	72.8484	12.4433	1.9626
2016-10-01 18:30:00	135.066	72.8478	12.6534	1.9067
2016-10-01 18:40:00	134.982	72.8473	13.0639	1.8769
2016-10-01 18:50:00	134.894	72.847	13.2678	1.8549
2016-10-01 19:00:00	134.805	72.8463	13.353	1.8157
2016-10-01 19:10:00	134.717	72.8463	13.3283	1.8016
2016-10-01 19:20:00	134.628	72.8463	13.4867	1.8012
2016-10-01 19:30:00	134.539	72.8456	13.6781	1.7895
2016-10-01 19:40:00	134.451	72.8456	13.9205	1.7695
2016-10-01 19:50:00	134.362	72.8448	14.0227	1.8131
2016-10-01 20:00:00	134.274	72.8447	13.9637	1.8149
2016-10-01 20:10:00	134.184	72.8441	13.9627	1.7981
2016-10-01 20:20:00	134.096	72.8439	13.9808	1.8288
2016-10-01 20:30:00	134.004	72.8433	13.0476	1.8625
2016-10-01 20:40:00	133.917	72.8427	13.007	1.8213
2016-10-01 20:50:00	133.827	72.8428	12.6811	1.892
2016-10-01 21:00:00	133.736	72.842	12.0194	1.8882
2016-10-01 21:10:00	133.643	72.8416	11.6886	1.7431
2016-10-01 21:20:00	133.55	72.841	12.3882	1.6751
2016-10-01 21:30:00	133.458	72.8407	13.1696	1.5914
2016-10-01 21:40:00	133.364	72.8407	13.2912	1.6518
2016-10-01 21:50:00	133.271	72.84	12.0044	1.7505
2016-10-01 22:00:00	133.177	72.8396	11.9462	1.6515
2016-10-01 22:10:00	133.093	72.8462	12.2856	1.5783
2016-10-01 22:20:00	132.999	72.8452	12.7747	1.54
2016-10-01 22:30:00	132.906	72.8446	13.1584	1.5514
2016-10-01 22:40:00	132.812	72.8439	13.2666	1.534
2016-10-01 22:50:00	132.719	72.8433	13.6921	1.4602
2016-10-01 23:00:00	132.633	72.8481	13.5015	1.5092
2016-10-01 23:10:00	132.541	72.8472	13.1121	1.5624
2016-10-01 23:20:00	132.48	72.8485	12.8973	1.5997
2016-10-01 23:30:00	132.464	72.8479	12.8047	1.567
2016-10-01 23:40:00	132.458	72.8455	12.8125	1.5693
2016-10-01 23:50:00	132.452	72.8431	12.7903	1.5889
2016-10-02	132.448	72.841	12.7658	1.5844
2016-10-02 00:10:00	132.443	72.8387	12.7435	1.5923
2016-10-02 00:20:00	132.438	72.8366	12.7355	1.5942
2016-10-02 00:30:00	132.434	72.8344	12.7378	1.5896
2016-10-02 00:40:00	132.431	72.832	12.7457	1.5897
2016-10-02 00:50:00	132.425	72.8301	12.7575	1.595
2016-10-02 01:00:00	132.389	72.8295	12.769	1.6326
2016-10-02 01:10:00	132.314	72.8291	12.6829	1.6975
2016-10-02 01:20:00	132.221	72.8293	12.6559	1.745
2016-10-02 01:30:00	132.12	72.8293	12.6231	1.753
2016-10-02 01:40:00	132.017	72.8289	12.5865	1.6708
2016-10-02 01:50:00	131.914	72.829	12.7615	1.5841
2016-10-02 02:00:00	131.812	72.8287	13.1524	1.6309
2016-10-02 02:10:00	131.71	72.8283	13.2593	1.6479
2016-10-02 02:20:00	131.609	72.8281	13.2033	1.6243
2016-10-02 02:30:00	131.507	72.8284	13.2486	1.5783
2016-10-02 02:40:00	131.407	72.828	13.7483	1.5255
2016-10-02 02:50:00	131.306	72.8277	14.2552	1.3913
2016-10-02 03:00:00	131.204	72.8279	14.7996	1.2812
2016-10-02 03:10:00	131.102	72.8277	15.3796	1.3522
2016-10-02 03:20:00	130.999	72.8274	15.6358	1.3677
2016-10-02 03:30:00	130.897	72.8274	15.7459	1.3527
2016-10-02 03:40:00	130.796	72.8274	15.381	1.3697
2016-10-02 03:50:00	130.697	72.827	15.1241	1.3683
2016-10-02 04:00:00	130.597	72.8268	15.0904	1.3598
2016-10-02 04:10:00	130.497	72.8265	14.978	1.3541
2016-10-02 04:20:00	130.398	72.8268	14.8559	1.3015
2016-10-02 04:30:00	130.323	72.8267	14.8262	1.3232
2016-10-02 04:40:00	130.295	72.8275	14.87	1.2719
2016-10-02 04:50:00	130.288	72.8274	14.8695	1.2345
2016-10-02 05:00:00	130.273	72.8263	14.8685	1.2231
2016-10-02 05:10:00	130.238	72.8352	14.8723	1.1522
2016-10-02 05:20:00	130.206	72.8454	14.8409	1.1008
2016-10-02 05:30:00	130.176	72.854	14.7807	1.0011
2016-10-02 05:40:00	130.14	72.8626	14.7557	0.8556
2016-10-02 05:50:00	130.103	72.8716	14.4362	0.659
2016-10-02 06:00:00	130.107	72.8708	14.0767	0.6615
2016-10-02 06:10:00	130.118	72.8583	13.9391	0.5503
2016-10-02 06:20:00	130.13	72.8441	13.9081	0.4015
2016-10-02 06:30:00	130.142	72.83	13.8844	0.4084
2016-10-02 06:40:00	130.155	72.8153	13.8807	0.4742
2016-10-02 06:50:00	130.168	72.8011	14.0957	0.6832
2016-10-02 07:00:00	130.18	72.7867	14.2799	0.7541
2016-10-02 07:10:00	130.21	72.7809	14.4669	0.9231
2016-10-02 07:20:00	130.251	72.7794	14.6747	1.1409
2016-10-02 07:30:00	130.296	72.7774	14.7209	1.2829
2016-10-02 07:40:00	130.343	72.7743	14.4547	1.3685
2016-10-02 07:50:00	130.352	72.7742	14.2493	1.4212
2016-10-02 08:00:00	130.345	72.7719	14.1202	1.4423
2016-10-02 08:10:00	130.316	72.7778	14.089	1.4218
2016-10-02 08:20:00	130.273	72.783	14.0863	1.3857
2016-10-02 08:30:00	130.228	72.7883	14.1119	1.3408
2016-10-02 08:40:00	130.183	72.7938	14.3142	1.2859
2016-10-02 08:50:00	130.169	72.7906	14.645	1.0722
2016-10-02 09:00:00	130.205	72.7822	14.7668	1.1435
2016-10-02 09:10:00	130.244	72.7731	14.8317	1.2156
2016-10-02 09:20:00	130.28	72.765	14.6144	1.3231
2016-10-02 09:30:00	130.317	72.7567	14.4058	1.3622
2016-10-02 09:40:00	130.351	72.7486	14.3581	1.4028
2016-10-02 09:50:00	130.384	72.741	14.3489	1.4056
2016-10-02 10:00:00	130.42	72.7327	14.405	1.443
2016-10-02 10:10:00	130.458	72.724	14.4451	1.4651
2016-10-02 10:20:00	130.494	72.7158	14.5774	1.5046
2016-10-02 10:30:00	130.531	72.7074	14.6927	1.4871
2016-10-02 10:40:00	130.569	72.6989	14.5365	1.4834
2016-10-02 10:50:00	130.605	72.6905	14.3525	1.4744
2016-10-02 11:00:00	130.634	72.6808	14.1874	1.4937
2016-10-02 11:10:00	130.635	72.6669	14.1317	1.4982
2016-10-02 11:20:00	130.636	72.6521	13.9647	1.5801
2016-10-02 11:30:00	130.638	72.639	13.8163	1.6257
2016-10-02 11:40:00	130.64	72.6247	13.7358	1.6884
2016-10-02 11:50:00	130.644	72.6138	13.6493	1.7106
2016-10-02 12:00:00	130.641	72.6104	13.5421	1.7302
2016-10-02 12:10:00	130.638	72.607	13.4928	1.7292
2016-10-02 12:20:00	130.644	72.5939	13.45	1.7053
2016-10-02 12:30:00	130.61	72.5735	13.4166	1.7151
2016-10-02 12:40:00	130.568	72.548	13.3315	1.7254
2016-10-02 12:50:00	130.522	72.5211	13.2838	1.6263
2016-10-02 13:00:00	130.477	72.4944	13.2252	1.5516
2016-10-02 13:10:00	130.432	72.4673	13.1766	1.4983
2016-10-02 13:20:00	130.386	72.4402	13.4129	1.4298
2016-10-02 13:30:00	130.34	72.413	14.077	1.2539
2016-10-02 13:40:00	130.295	72.3856	14.6711	1.0829
2016-10-02 13:50:00	130.251	72.3584	14.8651	1.0023
2016-10-02 14:00:00	130.204	72.3312	14.9048	1.0248
2016-10-02 14:10:00	130.159	72.3037	15.061	0.9419
2016-10-02 14:20:00	130.115	72.2767	15.3549	0.7765
2016-10-02 14:30:00	130.076	72.2535	15.2819	0.6683
2016-10-02 14:40:00	130.06	72.2439	14.9943	0.5968
2016-10-02 14:50:00	130.058	72.2396	14.669	0.5612
2016-10-02 15:00:00	130.053	72.2359	14.4087	0.5247
2016-10-02 15:10:00	130.04	72.24	14.211	0.5056
2016-10-02 15:20:00	130.058	72.2367	14.1025	0.5504
2016-10-02 15:30:00	130.056	72.2226	14.1685	0.5339
2016-10-02 15:40:00	130.057	72.2091	14.1519	0.4982
2016-10-02 15:50:00	130.058	72.1951	13.9915	0.5232
2016-10-02 16:00:00	130.06	72.181	13.2889	0.4156
2016-10-02 16:10:00	130.06	72.1719	12.305	0.3224
2016-10-02 16:20:00	130.052	72.167	11.685	0.283
2016-10-02 16:30:00	130.058	72.1575	11.1871	0.196
2016-10-02 16:40:00	130.074	72.1371	12.3232	0.5959
2016-10-02 16:50:00	130.082	72.1143	13.9001	0.9016
2016-10-02 17:00:00	130.093	72.0886	14.5272	1.0918
2016-10-02 17:10:00	130.102	72.061	14.6901	0.9572
2016-10-02 17:20:00	130.112	72.0339	13.4708	1.2328
2016-10-02 17:30:00	130.122	72.0067	12.158	1.362
2016-10-02 17:40:00	130.133	71.9794	11.6471	1.2492
2016-10-02 17:50:00	130.143	71.9511	10.1256	1.6003
2016-10-02 18:00:00	130.153	71.9224	9.0268	1.8665
2016-10-02 18:10:00	130.164	71.8934	8.2766	1.7151
2016-10-02 18:20:00	130.174	71.8645	8.2777	1.3928
2016-10-02 18:30:00	130.185	71.836	8.4947	1.4379
2016-10-02 18:40:00	130.194	71.8072	8.3897	1.804
2016-10-02 18:50:00	130.204	71.7786	7.788	2.1064
2016-10-02 19:00:00	130.215	71.7496	7.4949	2.047
2016-10-02 19:10:00	130.226	71.7208	7.8324	1.5152
2016-10-02 19:20:00	130.236	71.692	8.0583	1.4352
2016-10-02 19:30:00	130.246	71.664	8.142	1.381
2016-10-02 19:40:00	130.256	71.6353	8.0181	1.4041
2016-10-02 19:50:00	130.265	71.6065	7.9946	1.5733
2016-10-02 20:00:00	130.275	71.5774	7.6459	1.8407
2016-10-02 20:10:00	130.287	71.5483	7.3835	1.7472
2016-10-02 20:20:00	130.298	71.5189	7.2078	1.8477
2016-10-02 20:30:00	130.308	71.4893	6.8578	2.1397
2016-10-02 20:40:00	130.319	71.4601	6.135	1.8889
2016-10-02 20:50:00	130.329	71.4312	5.286	1.7342
2016-10-02 21:00:00	130.294	71.4163	5.4086	1.8486
2016-10-02 21:10:00	130.204	71.4165	5.3077	1.491
2016-10-02 21:20:00	130.113	71.4163	4.9256	1.4896
2016-10-02 21:30:00	130.024	71.4166	4.9775	1.1902
2016-10-02 21:40:00	129.952	71.4249	3.9803	1.4299
2016-10-02 21:50:00	129.9	71.4432	3.2505	1.5749
2016-10-02 22:00:00	129.846	71.4625	2.7659	1.9334
2016-10-02 22:10:00	129.791	71.4816	2.6733	2.0822
2016-10-02 22:20:00	129.737	71.5007	2.5283	2.0655
2016-10-02 22:30:00	129.682	71.5198	2.3302	2.0463
2016-10-02 22:40:00	129.627	71.5388	2.2192	2.0329
2016-10-02 22:50:00	129.573	71.5579	2.1675	1.9817
2016-10-02 23:00:00	129.518	71.5771	2.1611	2.026
2016-10-02 23:10:00	129.462	71.5966	2.286	2.0056
2016-10-02 23:20:00	129.405	71.6166	2.3708	1.9715
2016-10-02 23:30:00	129.346	71.6369	2.39	1.8183
2016-10-02 23:40:00	129.267	71.6431	2.2894	1.9558
2016-10-02 23:50:00	129.187	71.6401	2.3662	2.1728
2016-10-03	129.11	71.6374	2.4263	1.8662
2016-10-03 00:10:00	129.034	71.6352	2.5896	1.7484
2016-10-03 00:20:00	128.987	71.6423	2.6676	1.5699
2016-10-03 00:30:00	128.937	71.6459	2.6742	1.4853
2016-10-03 00:40:00	128.912	71.6474	2.7458	1.5316
2016-10-03 00:50:00	128.91	71.6487	2.8138	1.5312
2016-10-03 01:00:00	128.91	71.6482	2.8433	1.5275
2016-10-03 01:10:00	128.911	71.6483	2.8498	1.5268
2016-10-03 01:20:00	128.91	71.6482	2.8506	1.5453
2016-10-03 01:30:00	128.908	71.6484	2.8483	1.545
2016-10-03 01:40:00	128.91	71.6482	2.854	1.5173
2016-10-03 01:50:00	128.911	71.6483	2.8529	1.5198
2016-10-03 02:00:00	128.911	71.6483	2.8528	1.5224
2016-10-03 02:10:00	128.911	71.6483	2.8528	1.5272
2016-10-03 02:20:00	128.909	71.6484	2.8508	1.5178
2016-10-03 02:30:00	128.909	71.649	2.849	1.5667
2016-10-03 02:40:00	128.908	71.6498	2.852	1.5886
2016-10-03 02:50:00	128.947	71.6491	2.8594	1.5406
2016-10-03 03:00:00	128.973	71.6493	2.8756	1.5561
2016-10-03 03:10:00	128.973	71.6483	2.9258	1.5412
2016-10-03 03:20:00	128.973	71.6484	2.9339	1.5993
2016-10-03 03:30:00	128.974	71.6484	2.9328	1.5559
2016-10-03 03:40:00	128.974	71.6484	2.9235	1.5753
2016-10-03 03:50:00	128.973	71.6483	2.9126	1.567
2016-10-03 04:00:00	128.973	71.6484	2.8998	1.5689
2016-10-03 04:10:00	128.972	71.6484	2.8835	1.6166
2016-10-03 04:20:00	128.972	71.6483	2.8687	1.6215
2016-10-03 04:30:00	128.973	71.6483	2.8553	1.646
2016-10-03 04:40:00	128.973	71.6482	2.8435	1.6473
2016-10-03 04:50:00	128.974	71.6483	2.8324	1.6729
2016-10-03 05:00:00	128.974	71.6482	2.8228	1.6599
2016-10-03 05:10:00	128.974	71.6482	2.8165	1.6677
2016-10-03 05:20:00	128.973	71.6481	2.8116	1.6609
2016-10-03 05:30:00	128.972	71.6478	2.8085	1.6733
2016-10-03 05:40:00	128.973	71.6472	2.8024	1.6814
2016-10-03 05:50:00	128.972	71.6472	2.7972	1.679
2016-10-03 06:00:00	128.972	71.6472	2.7937	1.7018
2016-10-03 06:10:00	128.972	71.6472	2.7896	1.7056
2016-10-03 06:20:00	128.972	71.6471	2.7813	1.7124
2016-10-03 06:30:00	128.973	71.6471	2.7752	1.7258
2016-10-03 06:40:00	128.974	71.6471	2.7705	1.7165
2016-10-03 06:50:00	128.974	71.6472	2.767	1.716
2016-10-03 07:00:00	128.974	71.6471	2.7635	1.7348
2016-10-03 07:10:00	128.972	71.6484	2.7577	1.7803
2016-10-03 07:20:00	128.977	71.6492	2.7495	1.8164
2016-10-03 07:30:00	128.978	71.6478	2.7418	1.8386
2016-10-03 07:40:00	128.977	71.6478	2.7492	1.7832
2016-10-03 07:50:00	128.977	71.6478	2.745	1.786
2016-10-03 08:00:00	128.976	71.6478	2.7415	1.7991
2016-10-03 08:10:00	128.976	71.6478	2.7424	1.7979
2016-10-03 08:20:00	128.976	71.6477	2.738	1.7612
2016-10-03 08:30:00	128.977	71.6477	2.733	1.76
2016-10-03 08:40:00	128.978	71.6477	2.726	1.7757
2016-10-03 08:50:00	128.978	71.6477	2.7175	1.7999
2016-10-03 09:00:00	128.978	71.6477	2.7094	1.7556
2016-10-03 09:10:00	128.978	71.6477	2.7007	1.7797
2016-10-03 09:20:00	128.977	71.6477	2.6968	1.7515
2016-10-03 09:30:00	128.977	71.6477	2.6972	1.7531
2016-10-03 09:40:00	128.976	71.6477	2.7001	1.7601
2016-10-03 09:50:00	128.976	71.6477	2.7011	1.7721
2016-10-03 10:00:00	128.976	71.6477	2.702	1.751
2016-10-03 10:10:00	128.976	71.6477	2.7023	1.7352
2016-10-03 10:20:00	128.977	71.6476	2.7016	1.729
2016-10-03 10:30:00	128.977	71.6477	2.7007	1.7427
2016-10-03 10:40:00	128.978	71.6477	2.7008	1.7586
2016-10-03 10:50:00	128.978	71.6477	2.7011	1.7302
2016-10-03 11:00:00	128.978	71.6477	2.704	1.7263
2016-10-03 11:10:00	128.978	71.6476	2.7071	1.7214
2016-10-03 11:20:00	128.977	71.6476	2.7114	1.7146
2016-10-03 11:30:00	128.977	71.6476	2.7153	1.7133
2016-10-03 11:40:00	128.976	71.6477	2.7224	1.7121
2016-10-03 11:50:00	128.976	71.6477	2.73	1.6928
2016-10-03 12:00:00	128.976	71.6477	2.7363	1.6999
2016-10-03 12:10:00	128.977	71.6476	2.7404	1.7005
2016-10-03 12:20:00	128.977	71.6476	2.742	1.701
2016-10-03 12:30:00	128.978	71.6477	2.7413	1.7152
2016-10-03 12:40:00	128.978	71.6477	2.7435	1.6807
2016-10-03 12:50:00	128.978	71.6478	2.7449	1.6727
2016-10-03 13:00:00	128.978	71.6477	2.7468	1.6768
2016-10-03 13:10:00	128.978	71.6477	2.7511	1.6583
2016-10-03 13:20:00	128.978	71.6477	2.7523	1.6661
2016-10-03 13:30:00	128.977	71.6476	2.7565	1.654
2016-10-03 13:40:00	128.977	71.6476	2.7571	1.6547
2016-10-03 13:50:00	128.977	71.6476	2.7571	1.6451
2016-10-03 14:00:00	128.977	71.6477	2.7587	1.6435
2016-10-03 14:10:00	128.977	71.6477	2.7596	1.6487
2016-10-03 14:20:00	128.978	71.6477	2.7606	1.634
2016-10-03 14:30:00	128.978	71.6478	2.7616	1.6338
2016-10-03 14:40:00	128.978	71.6477	2.7653	1.6234
2016-10-03 14:50:00	128.978	71.6476	2.7708	1.6236
2016-10-03 15:00:00	128.977	71.6476	2.7743	1.617
2016-10-03 15:10:00	128.977	71.6476	2.78	1.6159
2016-10-03 15:20:00	128.977	71.6477	2.7834	1.617
2016-10-03 15:30:00	128.977	71.6476	2.7853	1.6124
2016-10-03 15:40:00	128.977	71.6476	2.787	1.6031
2016-10-03 15:50:00	128.977	71.6476	2.7864	1.5881
2016-10-03 16:00:00	128.978	71.6477	2.7854	1.5876
2016-10-03 16:10:00	128.978	71.6477	2.7851	1.5894
2016-10-03 16:20:00	128.978	71.6477	2.7876	1.5784
2016-10-03 16:30:00	128.978	71.6478	2.789	1.5712
2016-10-03 16:40:00	128.978	71.6477	2.7915	1.5626
2016-10-03 16:50:00	128.978	71.6476	2.7942	1.559
2016-10-03 17:00:00	128.977	71.6476	2.7978	1.5591
2016-10-03 17:10:00	128.977	71.6477	2.8024	1.5509
2016-10-03 17:20:00	128.977	71.6476	2.8056	1.5625
2016-10-03 17:30:00	128.977	71.6476	2.8078	1.5691
2016-10-03 17:40:00	128.977	71.6476	2.8119	1.5711
2016-10-03 17:50:00	128.977	71.6476	2.8142	1.578
2016-10-03 18:00:00	128.978	71.6476	2.8177	1.5941
2016-10-03 18:10:00	128.979	71.6477	2.8227	1.6119
2016-10-03 18:20:00	128.979	71.6478	2.8255	1.5915
2016-10-03 18:30:00	128.979	71.6477	2.8263	1.6029
2016-10-03 18:40:00	128.978	71.6477	2.8267	1.6173
2016-10-03 18:50:00	128.977	71.6476	2.8244	1.63
2016-10-03 19:00:00	128.977	71.6477	2.82	1.6301
2016-10-03 19:10:00	128.977	71.6476	2.8178	1.6432
2016-10-03 19:20:00	128.977	71.6477	2.8172	1.6454
2016-10-03 19:30:00	128.977	71.6476	2.8185	1.6604
2016-10-03 19:40:00	128.977	71.6476	2.8253	1.6648
2016-10-03 19:50:00	128.977	71.6476	2.8304	1.6565
2016-10-03 20:00:00	128.977	71.6476	2.833	1.6727
2016-10-03 20:10:00	128.978	71.6477	2.8341	1.6701
2016-10-03 20:20:00	128.978	71.6477	2.8353	1.6566
2016-10-03 20:30:00	128.978	71.6477	2.8284	1.6551
2016-10-03 20:40:00	128.978	71.6476	2.8187	1.6444
2016-10-03 20:50:00	128.977	71.6476	2.8094	1.6389
2016-10-03 21:00:00	128.977	71.6476	2.802	1.6423
2016-10-03 21:10:00	128.976	71.6477	2.797	1.6372
2016-10-03 21:20:00	128.977	71.6477	2.7932	1.6323
2016-10-03 21:30:00	128.977	71.6477	2.7906	1.6294
2016-10-03 21:40:00	128.978	71.6477	2.7938	1.669
2016-10-03 21:50:00	128.978	71.6477	2.8094	1.6485
2016-10-03 22:00:00	128.978	71.6477	2.8215	1.6433
2016-10-03 22:10:00	128.977	71.6476	2.828	1.6396
2016-10-03 22:20:00	128.977	71.6477	2.8258	1.6423
2016-10-03 22:30:00	128.976	71.6477	2.8219	1.6221
2016-10-03 22:40:00	128.977	71.6477	2.8152	1.6022
2016-10-03 22:50:00	128.978	71.6477	2.81	1.5812
2016-10-03 23:00:00	128.978	71.6477	2.8095	1.5455
2016-10-03 23:10:00	128.978	71.6477	2.8097	1.5288
2016-10-03 23:20:00	128.977	71.6476	2.811	1.5177
2016-10-03 23:30:00	128.977	71.6476	2.81	1.5223
2016-10-03 23:40:00	128.976	71.6477	2.8058	1.5264
2016-10-03 23:50:00	128.976	71.6477	2.8014	1.5386
2016-10-04	128.977	71.6476	2.7971	1.5412
2016-10-04 00:10:00	128.978	71.6477	2.7919	1.5422
2016-10-04 00:20:00	128.978	71.6477	2.7867	1.5312
2016-10-04 00:30:00	128.978	71.6477	2.7821	1.5313
2016-10-04 00:40:00	128.977	71.6477	2.7808	1.5392
2016-10-04 00:50:00	128.977	71.6477	2.7784	1.5347
2016-10-04 01:00:00	128.977	71.6476	2.7764	1.5368
2016-10-04 01:10:00	128.977	71.6477	2.7743	1.5456
2016-10-04 01:20:00	128.977	71.6477	2.7736	1.5526
2016-10-04 01:30:00	128.977	71.6477	2.7752	1.5616
2016-10-04 01:40:00	128.976	71.6477	2.7786	1.5631
2016-10-04 01:50:00	128.976	71.6477	2.7785	1.5651
2016-10-04 02:00:00	128.976	71.6477	2.7774	1.5623
2016-10-04 02:10:00	128.976	71.6477	2.7777	1.567
2016-10-04 02:20:00	128.976	71.6477	2.7793	1.5668
2016-10-04 02:30:00	128.976	71.6477	2.7796	1.5654
2016-10-04 02:40:00	128.976	71.6477	2.7793	1.5574
2016-10-04 02:50:00	128.977	71.6476	2.7789	1.5502
2016-10-04 03:00:00	128.977	71.6476	2.7767	1.5532
2016-10-04 03:10:00	128.977	71.6476	2.7759	1.5509
2016-10-04 03:20:00	128.977	71.6476	2.7764	1.554
2016-10-04 03:30:00	128.978	71.6477	2.7765	1.5494
2016-10-04 03:40:00	128.978	71.6477	2.7792	1.5641
2016-10-04 03:50:00	128.978	71.6477	2.7879	1.5534
2016-10-04 04:00:00	128.978	71.6477	2.7989	1.5552
2016-10-04 04:10:00	128.978	71.6477	2.8093	1.5702
2016-10-04 04:20:00	128.978	71.6477	2.8213	1.5713
2016-10-04 04:30:00	128.978	71.6476	2.8349	1.5806
2016-10-04 04:40:00	128.977	71.6476	2.847	1.5829
2016-10-04 04:50:00	128.977	71.6476	2.8583	1.5932
2016-10-04 05:00:00	128.977	71.6476	2.8698	1.6015
2016-10-04 05:10:00	128.977	71.6476	2.8806	1.6016
2016-10-04 05:20:00	128.977	71.6476	2.8906	1.6042
2016-10-04 05:30:00	128.977	71.6476	2.8994	1.6025
2016-10-04 05:40:00	128.978	71.6477	2.9049	1.6115
2016-10-04 05:50:00	128.978	71.6477	2.9112	1.6006
2016-10-04 06:00:00	128.978	71.6476	2.917	1.5944
2016-10-04 06:10:00	128.978	71.6476	2.9224	1.5888
2016-10-04 06:20:00	128.978	71.6477	2.9243	1.5866
2016-10-04 06:30:00	128.978	71.6477	2.926	1.5896
2016-10-04 06:40:00	128.978	71.6477	2.9256	1.5745
2016-10-04 06:50:00	128.978	71.6477	2.9229	1.5648
2016-10-04 07:00:00	128.978	71.6477	2.9194	1.5629
2016-10-04 07:10:00	128.978	71.6477	2.9133	1.5544
2016-10-04 07:20:00	128.977	71.6476	2.9067	1.5495
2016-10-04 07:30:00	128.977	71.6477	2.9001	1.5545
2016-10-04 07:40:00	128.977	71.6477	2.8942	1.5622
2016-10-04 07:50:00	128.977	71.6477	2.8881	1.5692
2016-10-04 08:00:00	128.976	71.6477	2.8834	1.575
2016-10-04 08:10:00	128.977	71.6477	2.8797	1.5842
2016-10-04 08:20:00	128.977	71.6476	2.8757	1.5892
2016-10-04 08:30:00	128.977	71.6476	2.8742	1.602
2016-10-04 08:40:00	128.978	71.6476	2.8742	1.5869
2016-10-04 08:50:00	128.978	71.6477	2.8766	1.5828
2016-10-04 09:00:00	128.978	71.6477	2.8777	1.5863
2016-10-04 09:10:00	128.978	71.6477	2.8742	1.5698
2016-10-04 09:20:00	128.977	71.6477	2.866	1.5663
2016-10-04 09:30:00	128.977	71.6477	2.8563	1.5726
2016-10-04 09:40:00	128.977	71.6477	2.8458	1.5567
2016-10-04 09:50:00	128.976	71.6477	2.8328	1.5528
2016-10-04 10:00:00	128.977	71.6477	2.8211	1.5496
2016-10-04 10:10:00	128.977	71.6477	2.8116	1.5356
2016-10-04 10:20:00	128.978	71.6476	2.799	1.5512
2016-10-04 10:30:00	128.978	71.6477	2.7863	1.5781
2016-10-04 10:40:00	128.977	71.6477	2.7715	1.6377
2016-10-04 10:50:00	128.977	71.6477	2.7571	1.6792
2016-10-04 11:00:00	128.977	71.6477	2.746	1.6902
2016-10-04 11:10:00	128.976	71.6477	2.7403	1.664
2016-10-04 11:20:00	128.976	71.6477	2.7382	1.636
2016-10-04 11:30:00	128.976	71.6477	2.7365	1.6082
2016-10-04 11:40:00	128.977	71.6476	2.7356	1.5631
2016-10-04 11:50:00	128.978	71.6477	2.7325	1.5556
2016-10-04 12:00:00	128.977	71.6476	2.7292	1.5762
2016-10-04 12:10:00	128.976	71.6477	2.7274	1.5868
2016-10-04 12:20:00	128.977	71.6477	2.7252	1.6236
2016-10-04 12:30:00	128.978	71.6477	2.7218	1.6291
2016-10-04 12:40:00	128.977	71.6477	2.7192	1.6166
2016-10-04 12:50:00	128.977	71.6477	2.7191	1.5592
2016-10-04 13:00:00	128.976	71.6477	2.726	1.532
2016-10-04 13:10:00	128.977	71.6477	2.7372	1.5187
2016-10-04 13:20:00	128.977	71.6477	2.7498	1.5125
2016-10-04 13:30:00	128.978	71.6477	2.7649	1.531
2016-10-04 13:40:00	128.978	71.6477	2.7729	1.5395
2016-10-04 13:50:00	128.978	71.6477	2.7754	1.5603
2016-10-04 14:00:00	128.977	71.6477	2.7731	1.5829
2016-10-04 14:10:00	128.977	71.6477	2.7692	1.5805
2016-10-04 14:20:00	128.977	71.6476	2.7647	1.5929
2016-10-04 14:30:00	128.977	71.6476	2.7611	1.6057
2016-10-04 14:40:00	128.978	71.6476	2.7555	1.6238
2016-10-04 14:50:00	128.978	71.6477	2.7498	1.6276
2016-10-04 15:00:00	128.978	71.6476	2.7448	1.6363
2016-10-04 15:10:00	128.977	71.6476	2.7421	1.6281
2016-10-04 15:20:00	128.977	71.6476	2.7407	1.6128
2016-10-04 15:30:00	128.977	71.6477	2.7436	1.5784
2016-10-04 15:40:00	128.977	71.6477	2.7504	1.532
2016-10-04 15:50:00	128.977	71.6477	2.7625	1.4885
2016-10-04 16:00:00	128.978	71.6477	2.7744	1.4808
2016-10-04 16:10:00	128.978	71.6477	2.7804	1.4759
2016-10-04 16:20:00	128.978	71.6477	2.783	1.485
2016-10-04 16:30:00	128.977	71.6476	2.7796	1.5143
2016-10-04 16:40:00	128.977	71.6477	2.7757	1.519
2016-10-04 16:50:00	128.977	71.6477	2.7716	1.5279
2016-10-04 17:00:00	128.977	71.6477	2.766	1.5425
2016-10-04 17:10:00	128.976	71.6477	2.7619	1.5506
2016-10-04 17:20:00	128.977	71.6477	2.7579	1.5607
2016-10-04 17:30:00	128.977	71.6476	2.7541	1.5755
2016-10-04 17:40:00	128.977	71.6476	2.7506	1.5826
2016-10-04 17:50:00	128.978	71.6477	2.7461	1.5914
2016-10-04 18:00:00	128.978	71.6477	2.7425	1.5909
2016-10-04 18:10:00	128.978	71.6477	2.7403	1.5963
2016-10-04 18:20:00	128.977	71.6476	2.7391	1.5996
2016-10-04 18:30:00	128.977	71.6477	2.7351	1.6083
2016-10-04 18:40:00	128.977	71.6477	2.7318	1.6219
2016-10-04 18:50:00	128.977	71.6476	2.7272	1.6372
2016-10-04 19:00:00	128.977	71.6476	2.7211	1.6468
2016-10-04 19:10:00	128.978	71.6477	2.7167	1.6519
2016-10-04 19:20:00	128.978	71.6478	2.7114	1.6497
2016-10-04 19:30:00	128.978	71.6478	2.7069	1.6643
2016-10-04 19:40:00	128.978	71.6477	2.7071	1.6476
2016-10-04 19:50:00	128.977	71.6476	2.7057	1.6379
2016-10-04 20:00:00	128.977	71.6476	2.703	1.6285
2016-10-04 20:10:00	128.977	71.6476	2.7002	1.6259
2016-10-04 20:20:00	128.977	71.6476	2.6979	1.6157
2016-10-04 20:30:00	128.978	71.6476	2.6956	1.6083
2016-10-04 20:40:00	128.978	71.6476	2.6918	1.5996
2016-10-04 20:50:00	128.978	71.6476	2.6892	1.5958
2016-10-04 21:00:00	128.978	71.6478	2.6839	1.5828
2016-10-04 21:10:00	128.978	71.6478	2.6815	1.5736
2016-10-04 21:20:00	128.978	71.6478	2.6761	1.5636
2016-10-04 21:30:00	128.978	71.6478	2.6728	1.5551
2016-10-04 21:40:00	128.977	71.6477	2.6672	1.546
2016-10-04 21:50:00	128.977	71.6476	2.6623	1.5327
2016-10-04 22:00:00	128.978	71.6476	2.658	1.5351
2016-10-04 22:10:00	128.978	71.6477	2.6533	1.5213
2016-10-04 22:20:00	128.979	71.6478	2.6499	1.5165
2016-10-04 22:30:00	128.979	71.6478	2.6453	1.5115
2016-10-04 22:40:00	128.978	71.6478	2.6412	1.5001
2016-10-04 22:50:00	128.978	71.6477	2.6374	1.4912
2016-10-04 23:00:00	128.977	71.6476	2.6337	1.4825
2016-10-04 23:10:00	128.977	71.6476	2.6285	1.4756
2016-10-04 23:20:00	128.978	71.6476	2.6256	1.469
2016-10-04 23:30:00	128.978	71.6477	2.6222	1.4579
2016-10-04 23:40:00	128.978	71.6477	2.6184	1.4566
2016-10-04 23:50:00	128.978	71.6477	2.6145	1.4542
2016-10-05	128.977	71.6476	2.6113	1.4482
2016-10-05 00:10:00	128.977	71.6476	2.6085	1.4495
2016-10-05 00:20:00	128.977	71.6477	2.605	1.4429
2016-10-05 00:30:00	128.977	71.6477	2.6021	1.4267
2016-10-05 00:40:00	128.977	71.6477	2.6	1.4302
2016-10-05 00:50:00	128.978	71.6477	2.5964	1.4197
2016-10-05 01:00:00	128.978	71.6477	2.5928	1.4103
2016-10-05 01:10:00	128.978	71.6477	2.5878	1.3995
2016-10-05 01:20:00	128.977	71.6477	2.5842	1.3861
2016-10-05 01:30:00	128.977	71.6477	2.5804	1.3881
2016-10-05 01:40:00	128.977	71.6476	2.5778	1.3788
2016-10-05 01:50:00	128.977	71.6476	2.5765	1.3733
2016-10-05 02:00:00	128.977	71.6476	2.5759	1.3657
2016-10-05 02:10:00	128.977	71.6476	2.5744	1.3664
2016-10-05 02:20:00	128.977	71.6477	2.5735	1.3674
2016-10-05 02:30:00	128.978	71.6477	2.5741	1.404
2016-10-05 02:40:00	128.977	71.6491	2.5772	1.4122
2016-10-05 02:50:00	128.954	71.6491	2.5735	1.4394
2016-10-05 03:00:00	128.919	71.6477	2.5672	1.5308
2016-10-05 03:10:00	128.899	71.6441	2.574	1.309
2016-10-05 03:20:00	128.899	71.6441	2.7132	1.1298
2016-10-05 03:30:00	128.899	71.644	2.7409	1.0616
2016-10-05 03:40:00	128.899	71.644	2.7773	1.0405
2016-10-05 03:50:00	128.899	71.644	2.8469	1.0252
2016-10-05 04:00:00	128.899	71.644	2.8732	1.0222
2016-10-05 04:10:00	128.899	71.644	2.8885	1.0029
2016-10-05 04:20:00	128.899	71.644	2.8986	0.9999
2016-10-05 04:30:00	128.899	71.644	2.9033	0.9985
2016-10-05 04:40:00	128.899	71.644	2.9034	1.0378
2016-10-05 04:50:00	128.899	71.644	2.9072	1.0559
2016-10-05 05:00:00	128.899	71.644	2.9106	1.0798
2016-10-05 05:10:00	128.899	71.644	2.9141	1.0621
2016-10-06 11:10:00	128.996	71.6344	2.8052	1.0592
2016-10-06 11:20:00	129.073	71.6341	2.6607	1.0243
2016-10-06 11:30:00	129.159	71.6386	2.4251	0.8763
2016-10-06 11:40:00	129.246	71.6429	1.9389	0.7922
2016-10-06 11:50:00	129.331	71.6438	1.8012	0.7985
2016-10-06 12:00:00	129.391	71.6224	1.5983	0.6655
2016-10-06 12:10:00	129.453	71.601	1.3509	0.6426
2016-10-06 12:20:00	129.516	71.5796	1.2929	0.614
2016-10-06 12:30:00	129.578	71.5574	1.3927	0.641
2016-10-06 12:40:00	129.64	71.5359	1.6555	0.834
2016-10-06 12:50:00	129.701	71.5138	1.7052	0.9261
2016-10-06 13:00:00	129.763	71.4917	1.7009	0.9093
2016-10-06 13:10:00	129.825	71.4692	1.8178	0.8008
2016-10-06 13:20:00	129.888	71.4471	2.2677	0.7735
2016-10-06 13:30:00	129.952	71.4249	3.4244	0.5147
2016-10-06 13:40:00	130.025	71.4153	4.3383	0.4478
2016-10-06 13:50:00	130.108	71.4159	5.017	1.2011
2016-10-06 14:00:00	130.192	71.4161	6.0746	1.5501
2016-10-06 14:10:00	130.278	71.4164	6.3771	1.6454
2016-10-06 14:20:00	130.327	71.425	6.5189	1.6207
2016-10-06 14:30:00	130.309	71.4505	6.5743	1.7193
2016-10-06 14:40:00	130.292	71.4758	6.6	1.8401
2016-10-06 14:50:00	130.274	71.5011	6.486	1.9097
2016-10-06 15:00:00	130.257	71.5263	6.4326	1.8929
2016-10-06 15:10:00	130.238	71.5513	6.4325	1.7294
2016-10-06 15:20:00	130.222	71.5764	6.4464	1.5056
2016-10-06 15:30:00	130.204	71.6018	6.7814	1.3752
2016-10-06 15:40:00	130.185	71.6274	7.1411	1.288
2016-10-06 15:50:00	130.167	71.6532	7.301	1.2564
2016-10-06 16:00:00	130.149	71.6787	7.3981	1.0978
2016-10-06 16:10:00	130.132	71.7031	7.4194	1.1758
2016-10-06 16:20:00	130.119	71.7208	7.4656	1.2044
2016-10-06 16:30:00	130.123	71.7202	7.4868	1.253
2016-10-06 16:40:00	130.12	71.7166	7.4281	1.2621
2016-10-06 16:50:00	130.123	71.7169	7.4078	1.2547
2016-10-06 17:00:00	130.112	71.7302	7.3986	1.2956
2016-10-06 17:10:00	130.103	71.7434	7.3496	1.3702
2016-10-06 17:20:00	130.094	71.757	7.2725	1.4283
2016-10-06 17:30:00	130.085	71.7708	7.2562	1.4661
2016-10-06 17:40:00	130.076	71.7847	7.2216	1.5501
2016-10-06 17:50:00	130.067	71.798	7.0456	1.6015
2016-10-06 18:00:00	130.058	71.8113	6.9554	1.5953
2016-10-06 18:10:00	130.049	71.825	6.8895	1.578
2016-10-06 18:20:00	130.04	71.8387	6.8432	1.5511
2016-10-06 18:30:00	130.031	71.8526	6.8326	1.4879
2016-10-06 18:40:00	130.061	71.8558	6.8339	1.4357
2016-10-06 18:50:00	130.109	71.8525	6.8574	1.5024
2016-10-06 19:00:00	130.123	71.8372	6.8385	1.5867
2016-10-06 19:10:00	130.134	71.8225	6.7836	1.6061
2016-10-06 19:20:00	130.145	71.808	6.7435	1.635
2016-10-06 19:30:00	130.156	71.7934	6.7741	1.656
2016-10-06 19:40:00	130.167	71.7793	7.1401	1.6808
2016-10-06 19:50:00	130.176	71.7657	7.3317	1.7148
2016-10-06 20:00:00	130.187	71.7519	7.3178	1.764
2016-10-06 20:10:00	130.197	71.7382	7.173	1.8047
2016-10-06 20:20:00	130.228	71.7287	7.067	1.7625
2016-10-06 20:30:00	130.262	71.7198	6.9983	1.7916
2016-10-06 20:40:00	130.296	71.7109	6.8164	1.8315
2016-10-06 20:50:00	130.333	71.7013	6.6212	1.8613
2016-10-06 21:00:00	130.366	71.6926	6.565	1.8568
2016-10-06 21:10:00	130.365	71.6913	6.5678	1.8493
2016-10-06 21:20:00	130.364	71.6905	6.5637	1.8255
2016-10-06 21:30:00	130.389	71.6828	6.5698	1.8274
2016-10-06 21:40:00	130.426	71.6743	6.6622	1.8
2016-10-06 21:50:00	130.463	71.666	6.7598	1.8177
2016-10-06 22:00:00	130.5	71.6577	6.7541	1.8366
2016-10-06 22:10:00	130.538	71.6494	6.6151	1.8682
2016-10-06 22:20:00	130.574	71.6409	6.3779	1.9732
2016-10-06 22:30:00	130.583	71.6409	6.0954	2.0257
2016-10-06 22:40:00	130.581	71.6402	5.9779	2.0471
2016-10-06 22:50:00	130.582	71.6395	5.9401	2.0367
2016-10-06 23:00:00	130.581	71.6387	5.9234	2.0245
2016-10-06 23:10:00	130.579	71.638	5.9186	2.0192
2016-10-06 23:20:00	130.577	71.6371	5.9182	2.02
2016-10-06 23:30:00	130.563	71.6481	5.9182	2.0162
2016-10-06 23:40:00	130.544	71.6687	5.9211	1.9899
2016-10-06 23:50:00	130.52	71.6957	5.9261	1.9481
2016-10-07	130.496	71.723	6.0837	1.9273
2016-10-07 00:10:00	130.472	71.7505	6.1228	1.9605
2016-10-07 00:20:00	130.447	71.778	6.0721	1.958
2016-10-07 00:30:00	130.422	71.8054	6.0748	1.9393
2016-10-07 00:40:00	130.397	71.8333	6.0932	1.9427
2016-10-07 00:50:00	130.372	71.8612	6.6849	1.7835
2016-10-07 01:00:00	130.346	71.8892	7.1679	1.6903
2016-10-07 01:10:00	130.321	71.9169	7.2935	1.7153
2016-10-07 01:20:00	130.298	71.944	7.3513	1.6123
2016-10-07 01:30:00	130.272	71.9715	6.9523	1.5526
2016-10-07 01:40:00	130.247	71.9989	6.8335	1.4707
2016-10-07 01:50:00	130.221	72.0263	6.8258	1.4951
2016-10-07 02:00:00	130.196	72.0539	6.8029	1.432
2016-10-07 02:10:00	130.171	72.0815	6.9769	1.2601
2016-10-07 02:20:00	130.146	72.1091	7.3046	1.2535
2016-10-07 02:30:00	130.121	72.1366	7.3901	1.2507
2016-10-07 02:40:00	130.096	72.1642	7.7299	1.1428
2016-10-07 02:50:00	130.082	72.1794	8.8284	0.8978
2016-10-07 03:00:00	130.082	72.1794	8.8284	0.8978
2016-10-07 03:10:00	130.082	72.1794	8.8284	0.8978
2016-10-07 03:20:00	130.082	72.1794	8.8284	0.8978
2016-10-07 03:30:00	130.082	72.1794	8.8284	0.8978
2016-10-07 03:40:00	130.082	72.1794	8.8284	0.8978
2016-10-07 03:50:00	130.082	72.1794	8.8284	0.8978
2016-10-07 04:00:00	130.082	72.1794	8.8284	0.8978
2016-10-07 04:10:00	130.082	72.1794	8.8284	0.8978
2016-10-07 04:20:00	130.082	72.1794	8.8284	0.8978
2016-10-07 04:30:00	130.091	72.2281	12.2192	0.8963
2016-10-07 04:40:00	130.156	72.2364	12.1223	0.8691
2016-10-07 04:50:00	130.233	72.2461	11.8424	0.8167
2016-10-07 05:00:00	130.313	72.2559	10.8539	0.92
2016-10-07 05:10:00	130.393	72.2658	9.8466	1.0493
2016-10-07 05:20:00	130.475	72.2758	9.261	1.1661
2016-10-07 05:30:00	130.554	72.2859	8.8878	1.2368
2016-10-07 05:40:00	130.633	72.2957	8.7724	1.2459
2016-10-07 05:50:00	130.713	72.3053	8.349	1.3564
2016-10-07 06:00:00	130.792	72.3152	8.1273	1.424
2016-10-07 06:10:00	130.872	72.3249	7.79	1.5913
2016-10-07 06:20:00	130.953	72.3349	7.602	1.6974
2016-10-07 06:30:00	131.034	72.3449	7.6173	1.6051
2016-10-07 06:40:00	131.109	72.3544	8.8067	1.6491
2016-10-07 06:50:00	131.185	72.3636	9.3819	1.6404
2016-10-07 07:00:00	131.264	72.3734	9.387	1.622
2016-10-07 07:10:00	131.344	72.3832	9.0854	1.6962
2016-10-07 07:20:00	131.422	72.393	9.144	1.6514
2016-10-07 07:30:00	131.502	72.403	9.332	1.4907
2016-10-07 07:40:00	131.582	72.4124	9.3776	1.5573
2016-10-07 07:50:00	131.661	72.4224	9.4676	1.5689
2016-10-07 08:00:00	131.741	72.4322	8.6715	1.6785
2016-10-07 08:10:00	131.822	72.4421	8.301	1.7517
2016-10-07 08:20:00	131.902	72.4519	8.1599	1.8136
2016-10-07 08:30:00	131.984	72.462	8.1029	1.7961
2016-10-07 08:40:00	132.065	72.4721	8.1817	1.7116
2016-10-07 08:50:00	132.145	72.4822	8.4206	1.6281
2016-10-07 09:00:00	132.225	72.4917	8.3031	1.6789
2016-10-07 09:10:00	132.303	72.5012	7.7758	1.7192
2016-10-07 09:20:00	132.382	72.511	7.5587	1.7297
2016-10-07 09:30:00	132.462	72.5207	7.2853	1.8545
2016-10-07 09:40:00	132.542	72.5302	7.126	1.8403
2016-10-07 09:50:00	132.621	72.5401	7.0695	1.8944
2016-10-07 10:00:00	132.702	72.5497	7.0855	1.8928
2016-10-07 10:10:00	132.78	72.5593	7.242	1.9024
2016-10-07 10:20:00	132.857	72.5691	7.4569	2.0094
2016-10-07 10:30:00	132.935	72.5784	7.7085	2.007
2016-10-07 10:40:00	133.012	72.5876	7.9686	2.0047
2016-10-07 10:50:00	133.089	72.5972	8.2763	1.9861
2016-10-07 11:00:00	133.166	72.6068	8.5031	1.9871
2016-10-07 11:10:00	133.245	72.6163	8.5648	2.0567
2016-10-07 11:20:00	133.323	72.6253	8.6751	2.0667
2016-10-07 11:30:00	133.402	72.6349	8.8415	2.0956
2016-10-07 11:40:00	133.48	72.6448	9.0767	2.0065
2016-10-07 11:50:00	133.56	72.6544	9.1565	1.9999
2016-10-07 12:00:00	133.639	72.6636	9.3927	1.9689
2016-10-07 12:10:00	133.717	72.6732	9.45	1.98
2016-10-07 12:20:00	133.781	72.681	9.4756	1.9893
2016-10-07 12:30:00	133.796	72.6825	9.5087	2.0207
2016-10-07 12:40:00	133.795	72.6806	9.5417	1.9877
2016-10-07 12:50:00	133.819	72.6788	9.572	1.9647
2016-10-07 13:00:00	133.891	72.6843	9.5528	1.9484
2016-10-07 13:10:00	133.975	72.69	9.5075	1.9327
2016-10-07 13:20:00	134.06	72.6955	9.5647	1.9309
2016-10-07 13:30:00	134.144	72.7016	9.6224	1.9282
2016-10-07 13:40:00	134.227	72.7078	9.6555	1.9463
2016-10-07 13:50:00	134.311	72.7134	9.6425	1.9079
2016-10-07 14:00:00	134.395	72.7189	9.631	1.8921
2016-10-07 14:10:00	134.48	72.7247	9.6313	1.8553
2016-10-07 14:20:00	134.563	72.7307	9.6531	1.7786
2016-10-07 14:30:00	134.647	72.7364	9.9893	1.7461
2016-10-07 14:40:00	134.729	72.7419	10.2999	1.7028
2016-10-07 14:50:00	134.812	72.7478	10.3748	1.7235
2016-10-07 15:00:00	134.895	72.7535	10.3441	1.7679
2016-10-07 15:10:00	134.978	72.7593	10.2946	1.8089
2016-10-07 15:20:00	135.064	72.7652	10.2359	1.8303
2016-10-07 15:30:00	135.15	72.771	10.1975	1.7617
2016-10-07 15:40:00	135.236	72.7771	10.2065	1.6305
2016-10-07 15:50:00	135.323	72.783	10.2656	1.693
2016-10-07 16:00:00	135.41	72.789	10.2744	1.7001
2016-10-07 16:10:00	135.498	72.7949	10.2795	1.675
2016-10-07 16:20:00	135.585	72.8012	10.4837	1.5346
2016-10-07 16:30:00	135.671	72.8072	10.5186	1.549
2016-10-07 16:40:00	135.76	72.8132	10.5619	1.6216
2016-10-07 16:50:00	135.849	72.8192	10.5666	1.6625
2016-10-07 17:00:00	135.94	72.8256	10.7648	1.5815
2016-10-07 17:10:00	136.03	72.8316	10.9476	1.5661
2016-10-07 17:20:00	136.121	72.8378	10.9971	1.5388
2016-10-07 17:30:00	136.211	72.844	11.0491	1.5165
2016-10-07 17:40:00	136.301	72.8503	11.0588	1.5153
2016-10-07 17:50:00	136.388	72.8562	11.0572	1.5523
2016-10-07 18:00:00	136.476	72.8622	11.1161	1.4519
2016-10-07 18:10:00	136.565	72.8682	11.4575	1.3973
2016-10-07 18:20:00	136.655	72.8746	11.7138	1.2646
2016-10-07 18:30:00	136.746	72.8809	12.0402	1.2011
2016-10-07 18:40:00	136.838	72.8833	12.1125	1.2114
2016-10-07 18:50:00	136.931	72.883	11.9519	1.2071
2016-10-07 19:00:00	137.024	72.8831	12.6123	1.0613
2016-10-07 19:10:00	137.116	72.8834	12.9182	1.019
2016-10-07 19:20:00	137.209	72.8835	13.0749	1.0088
2016-10-07 19:30:00	137.3	72.8838	13.3218	0.8925
2016-10-07 19:40:00	137.389	72.8837	14.2239	0.7897
2016-10-07 19:50:00	137.477	72.8833	14.4459	0.8072
2016-10-07 20:00:00	137.56	72.8827	14.4916	0.7724
2016-10-07 20:10:00	137.609	72.8818	14.5178	0.7855
2016-10-07 20:20:00	137.618	72.883	0	0.7904
2016-10-07 20:30:00	137.619	72.8821	14.5026	0.794
2016-10-07 20:40:00	137.638	72.8832	14.4305	0.8125
2016-10-07 20:50:00	137.713	72.8907	14.4643	0.8122
2016-10-07 21:00:00	137.796	72.8991	14.5086	0.8687
2016-10-07 21:10:00	137.88	72.9068	14.4994	0.8684
2016-10-07 21:20:00	137.962	72.9147	14.6616	0.8
2016-10-07 21:30:00	138.043	72.9227	14.6781	0.8365
2016-10-07 21:40:00	138.123	72.9303	14.746	0.8551
2016-10-07 21:50:00	138.204	72.9383	14.7839	0.8639
2016-10-07 22:00:00	138.286	72.9462	14.7839	0.7894
2016-10-07 22:10:00	138.369	72.9543	14.7434	0.7416
2016-10-07 22:20:00	138.454	72.9635	15.5236	0.3412
2016-10-07 22:30:00	138.54	72.9717	16.1217	0.5566
2016-10-07 22:40:00	138.622	72.9791	15.7246	0.4933
2016-10-07 22:50:00	138.702	72.9866	16.9874	0.3694
2016-10-07 23:00:00	138.785	72.9947	17.2559	0.3955
2016-10-07 23:10:00	138.87	73.003	17.4905	0.4251
2016-10-07 23:20:00	138.953	73.0112	18.0123	0.2695
2016-10-07 23:30:00	139.035	73.0191	17.9287	0.3107
2016-10-07 23:40:00	139.115	73.027	16.7744	0.2926
2016-10-07 23:50:00	139.195	73.0348	16.1794	0.3412
2016-10-08	139.276	73.0428	16.109	0.4362
2016-10-08 00:10:00	139.355	73.05	16.241	0.4474
2016-10-08 00:20:00	139.433	73.0574	16.2908	0.4253
2016-10-08 00:30:00	139.508	73.0648	16.6606	0.477
2016-10-08 00:40:00	139.583	73.0721	18.1258	0.5518
2016-10-08 00:50:00	139.659	73.0793	18.4297	0.547
2016-10-08 01:00:00	139.737	73.0869	18.8985	0.764
2016-10-08 01:10:00	139.817	73.0944	20.0386	0.9147
2016-10-08 01:20:00	139.896	73.1022	20.5185	0.8751
2016-10-08 01:30:00	139.975	73.1099	20.9604	0.9165
2016-10-08 01:40:00	140.055	73.1174	21.257	0.8896
2016-10-08 01:50:00	140.135	73.1251	21.4055	0.8637
2016-10-08 02:00:00	140.215	73.1329	21.4074	0.8286
2016-10-08 02:10:00	140.294	73.1403	21.3504	0.7512
2016-10-08 02:20:00	140.372	73.1476	21.3323	0.6922
2016-10-08 02:30:00	140.45	73.1552	21.305	0.6896
2016-10-08 02:40:00	140.53	73.1629	21.1721	0.7639
2016-10-08 02:50:00	140.612	73.1707	21.3183	0.7492
2016-10-08 03:00:00	140.693	73.1786	21.4797	0.7934
2016-10-08 03:10:00	140.775	73.1862	21.6173	0.7727
2016-10-08 03:20:00	140.857	73.1944	21.7278	0.7549
2016-10-08 03:30:00	140.94	73.1962	21.8269	0.6413
2016-10-08 03:40:00	141.026	73.1922	21.7893	0.5781
2016-10-08 03:50:00	141.113	73.1881	21.7239	0.6043
2016-10-08 04:00:00	141.2	73.184	21.7125	0.6602
2016-10-08 04:10:00	141.288	73.18	21.7881	0.6853
2016-10-08 04:20:00	141.375	73.1756	21.8854	0.6413
2016-10-08 04:30:00	141.461	73.1717	21.9182	0.6206
2016-10-08 04:40:00	141.547	73.1677	21.9611	0.6142
2016-10-08 04:50:00	141.632	73.1637	22.0112	0.6343
2016-10-08 05:00:00	141.716	73.1599	22.1182	0.6096
2016-10-08 05:10:00	141.798	73.1558	22.1442	0.6291
2016-10-08 05:20:00	141.88	73.152	22.2618	0.7288
2016-10-08 05:30:00	141.963	73.148	22.5166	0.7503
2016-10-08 05:40:00	142.045	73.1442	22.6583	0.802
2016-10-08 05:50:00	142.126	73.1405	22.7575	0.929
2016-10-08 06:00:00	142.207	73.1366	22.8612	0.9868
2016-10-08 06:10:00	142.29	73.1326	22.7958	0.9899
2016-10-08 06:20:00	142.372	73.1286	22.788	0.967
2016-10-08 06:30:00	142.452	73.125	22.8907	1.0191
2016-10-08 06:40:00	142.532	73.121	22.7754	1.0514
2016-10-08 06:50:00	142.613	73.1172	22.5417	1.0836
2016-10-08 07:00:00	142.692	73.1136	22.2768	1.1306
2016-10-08 07:10:00	142.771	73.1099	22.0594	1.1751
2016-10-08 07:20:00	142.85	73.106	21.9509	1.198
2016-10-08 07:30:00	142.932	73.1021	21.9033	1.1965
2016-10-08 07:40:00	143.013	73.0982	22.011	1.2076
2016-10-08 07:50:00	143.092	73.0947	22.5254	1.1587
2016-10-08 08:00:00	143.172	73.0909	22.6539	1.1885
2016-10-08 08:10:00	143.251	73.087	22.8662	1.1676
2016-10-08 08:20:00	143.306	73.0834	22.9233	1.1728
2016-10-08 08:30:00	143.336	73.0828	23.0284	1.1923
2016-10-08 08:40:00	143.326	73.0807	0	1.1172
2016-10-08 08:50:00	143.317	73.0811	23.219	1.1708
2016-10-08 09:00:00	143.347	73.0809	23.2749	1.2241
2016-10-08 09:10:00	143.417	73.0798	23.2997	1.2094
2016-10-08 09:20:00	143.497	73.0786	23.295	1.2014
2016-10-08 09:30:00	143.578	73.0775	23.3104	1.2111
2016-10-08 09:40:00	143.66	73.0766	23.2823	1.2068
2016-10-08 09:50:00	143.739	73.0753	23.25	1.2242
2016-10-08 10:00:00	143.818	73.0742	23.2549	1.2453
2016-10-08 10:10:00	143.899	73.073	23.3385	1.2552
2016-10-08 10:20:00	143.981	73.0722	23.3696	1.3059
2016-10-08 10:30:00	144.065	73.0712	23.3802	1.3128
2016-10-08 10:40:00	144.146	73.0698	23.4072	1.3024
2016-10-08 10:50:00	144.223	73.0688	23.3961	1.2806
2016-10-08 11:00:00	144.3	73.068	23.4012	1.3145
2016-10-08 11:10:00	144.376	73.0671	23.4717	1.3525
2016-10-08 11:20:00	144.451	73.0661	23.5134	1.3541
2016-10-08 11:30:00	144.527	73.065	23.5176	1.3599
2016-10-08 11:40:00	144.602	73.0638	23.5106	1.3833
2016-10-08 11:50:00	144.677	73.0629	23.5075	1.3887
2016-10-08 12:00:00	144.752	73.0621	23.4909	1.3874
2016-10-08 12:10:00	144.824	73.0612	23.4894	1.3933
2016-10-08 12:20:00	144.898	73.0601	23.4943	1.3382
2016-10-08 12:30:00	144.972	73.059	23.5168	1.3089
2016-10-08 12:40:00	145.046	73.058	23.5166	1.2904
2016-10-08 12:50:00	145.119	73.0569	23.5255	1.3199
2016-10-08 13:00:00	145.19	73.056	23.5229	1.378
2016-10-08 13:10:00	145.262	73.0554	23.5088	1.3768
2016-10-08 13:20:00	145.331	73.0542	23.5092	1.3514
2016-10-08 13:30:00	145.403	73.0534	23.4631	1.3404
2016-10-08 13:40:00	145.474	73.0525	23.4417	1.316
2016-10-08 13:50:00	145.545	73.0514	23.432	1.3534
2016-10-08 14:00:00	145.615	73.0505	23.4398	1.3448
2016-10-08 14:10:00	145.683	73.0497	23.4346	1.3672
2016-10-08 14:20:00	145.752	73.0491	23.4431	1.422
2016-10-08 14:30:00	145.823	73.048	23.449	1.3653
2016-10-08 14:40:00	145.89	73.0474	23.4757	1.3979
2016-10-08 14:50:00	145.96	73.0465	23.4595	1.3894
2016-10-08 15:00:00	146.028	73.0454	23.4424	1.4029
2016-10-08 15:10:00	146.093	73.0447	23.4378	1.4057
2016-10-08 15:20:00	146.159	73.0437	23.4441	1.3889
2016-10-08 15:30:00	146.223	73.0429	23.4603	1.412
2016-10-08 15:40:00	146.286	73.0419	23.4661	1.4559
2016-10-08 15:50:00	146.345	73.0413	23.4739	1.4813
2016-10-08 16:00:00	146.402	73.0405	23.4711	1.4999
2016-10-08 16:10:00	146.46	73.04	23.4755	1.4807
2016-10-08 16:20:00	146.517	73.039	23.4615	1.5122
2016-10-08 16:30:00	146.577	73.0382	23.4494	1.5318
2016-10-08 16:40:00	146.634	73.0375	23.4455	1.5405
2016-10-08 16:50:00	146.689	73.0367	23.4482	1.5432
2016-10-08 17:00:00	146.746	73.0361	23.4359	1.5482
2016-10-08 17:10:00	146.804	73.0354	23.4282	1.5601
2016-10-08 17:20:00	146.86	73.0345	23.439	1.5562
2016-10-08 17:30:00	146.917	73.0341	23.4575	1.5938
2016-10-08 17:40:00	146.97	73.0337	23.4428	1.5542
2016-10-08 17:50:00	147.025	73.0336	23.4158	1.5408
2016-10-08 18:00:00	147.082	73.0337	23.4357	1.5496
2016-10-08 18:10:00	147.141	73.0338	23.4283	1.5621
2016-10-08 18:20:00	147.203	73.0271	23.4343	1.5472
2016-10-08 18:30:00	147.266	73.0204	23.4374	1.5638
2016-10-08 18:40:00	147.33	73.0138	23.4477	1.6476
2016-10-08 18:50:00	147.392	73.0068	23.4304	1.5822
2016-10-08 19:00:00	147.456	73.0002	23.3775	1.5834
2016-10-08 19:10:00	147.52	72.9936	23.3236	1.5739
2016-10-08 19:20:00	147.583	72.9868	23.34	1.6148
2016-10-08 19:30:00	147.645	72.9802	23.3628	1.5964
2016-10-08 19:40:00	147.71	72.9735	23.3239	1.6318
2016-10-08 19:50:00	147.773	72.9668	23.3035	1.6276
2016-10-08 20:00:00	147.835	72.9601	23.3371	1.6668
2016-10-08 20:10:00	147.897	72.9533	23.4	1.6562
2016-10-08 20:20:00	147.96	72.9466	23.4418	1.5801
2016-10-08 20:30:00	148.023	72.9397	23.4642	1.595
2016-10-08 20:40:00	148.088	72.9329	23.4805	1.6535
2016-10-08 20:50:00	148.152	72.9259	23.4702	1.6447
2016-10-08 21:00:00	148.217	72.9191	23.464	1.626
2016-10-08 21:10:00	148.282	72.912	23.4388	1.6606
2016-10-08 21:20:00	148.348	72.9051	23.3861	1.6847
2016-10-08 21:30:00	148.412	72.8981	23.3326	1.702
2016-10-08 21:40:00	148.476	72.891	23.2913	1.7255
2016-10-08 21:50:00	148.542	72.8841	23.2569	1.7229
2016-10-08 22:00:00	148.607	72.8771	23.1886	1.7841
2016-10-08 22:10:00	148.675	72.8699	23.1277	1.8248
2016-10-08 22:20:00	148.742	72.8625	23.0905	1.7848
2016-10-08 22:30:00	148.809	72.8555	23.0714	1.8059
2016-10-08 22:40:00	148.876	72.8483	23.0336	1.83
2016-10-08 22:50:00	148.944	72.8409	23.0483	1.8293
2016-10-08 23:00:00	149.011	72.8336	23.0441	1.8547
2016-10-08 23:10:00	149.082	72.8263	23.0304	1.8722
2016-10-08 23:20:00	149.152	72.8186	22.9242	1.8852
2016-10-08 23:30:00	149.222	72.8112	22.8057	1.9148
2016-10-08 23:40:00	149.293	72.8034	22.704	1.9245
2016-10-08 23:50:00	149.367	72.7957	22.5959	1.9382
2016-10-09	149.44	72.7874	22.5364	1.9283
2016-10-09 00:10:00	149.514	72.7792	22.4464	1.9395
2016-10-09 00:20:00	149.587	72.7713	22.3334	1.9565
2016-10-09 00:30:00	149.662	72.7636	22.2542	1.973
2016-10-09 00:40:00	149.735	72.7554	22.1591	1.963
2016-10-09 00:50:00	149.809	72.7473	22.1212	2.0187
2016-10-09 01:00:00	149.883	72.7395	22.1163	2.0221
2016-10-09 01:10:00	149.957	72.7316	22.1437	2.0437
2016-10-09 01:20:00	150.031	72.7237	22.2218	2.0428
2016-10-09 01:30:00	150.106	72.7156	22.3337	1.978
2016-10-09 01:40:00	150.159	72.7097	22.4172	1.9626
2016-10-09 01:50:00	150.176	72.7088	22.5496	2.0128
2016-10-09 02:00:00	150.174	72.7096	22.548	2.0175
2016-10-09 02:10:00	150.158	72.71	22.5741	1.988
2016-10-09 02:20:00	150.179	72.7024	22.582	2.02
2016-10-09 02:30:00	150.209	72.6847	22.5324	1.9849
2016-10-09 02:40:00	150.244	72.6619	22.4173	2.0347
2016-10-09 02:50:00	150.28	72.638	22.1758	2.1004
2016-10-09 03:00:00	150.316	72.614	21.9934	2.1315
2016-10-09 03:10:00	150.352	72.5902	21.8469	2.159
2016-10-09 03:20:00	150.389	72.5663	21.7479	2.1873
2016-10-09 03:30:00	150.424	72.5423	21.6073	2.2557
2016-10-09 03:40:00	150.46	72.5185	21.4395	2.2745
2016-10-09 03:50:00	150.496	72.4951	21.2082	2.2672
2016-10-09 04:00:00	150.53	72.4715	21.0172	2.2906
2016-10-09 04:10:00	150.567	72.4479	20.9502	2.2772
2016-10-09 04:20:00	150.601	72.4244	20.9326	2.2898
2016-10-09 04:30:00	150.636	72.4011	20.8271	2.2976
2016-10-09 04:40:00	150.671	72.3779	20.7313	2.3044
2016-10-09 04:50:00	150.706	72.3546	20.662	2.3203
2016-10-09 05:00:00	150.74	72.331	20.5621	2.3069
2016-10-09 05:10:00	150.776	72.3078	20.3961	2.3279
2016-10-09 05:20:00	150.81	72.2847	20.2661	2.333
2016-10-09 05:30:00	150.844	72.2613	20.1292	2.3531
2016-10-09 05:40:00	150.878	72.2382	20.0328	2.3693
2016-10-09 05:50:00	150.913	72.215	19.9247	2.3691
2016-10-09 06:00:00	150.948	72.1918	19.8186	2.3879
2016-10-09 06:10:00	150.982	72.1683	19.7944	2.3718
2016-10-09 06:20:00	151.016	72.1453	19.8186	2.386
2016-10-09 06:30:00	151.051	72.1222	19.7947	2.4064
2016-10-09 06:40:00	151.084	72.0987	19.7258	2.4353
2016-10-09 06:50:00	151.119	72.0748	19.66	2.4371
2016-10-09 07:00:00	151.154	72.0512	19.6613	2.4393
2016-10-09 07:10:00	151.189	72.0276	19.6414	2.4429
2016-10-09 07:20:00	151.224	72.0041	19.5548	2.4635
2016-10-09 07:30:00	151.258	71.9801	19.4523	2.4674
2016-10-09 07:40:00	151.293	71.9561	19.4094	2.4682
2016-10-09 07:50:00	151.328	71.9323	19.4064	2.4675
2016-10-09 08:00:00	151.364	71.9085	19.4059	2.4902
2016-10-09 08:10:00	151.398	71.8845	19.4991	2.4906
2016-10-09 08:20:00	151.433	71.8601	19.5167	2.4717
2016-10-09 08:30:00	151.469	71.8357	19.4864	2.4705
2016-10-09 08:40:00	151.505	71.811	19.5118	2.4834
2016-10-09 08:50:00	151.541	71.7861	19.5822	2.4808
[truncated: 1,478 more rows]

## Sheet: 2019
mon/day/yr	hh:mm	Longitude [degrees_east]	Latitude [degrees_north]	Temperature [C]	Salinity [PSU]
09/18/2019	16:21:00	41.6226	67.6328	7.7991	28.3506
09/18/2019	16:29:00	41.6484	67.6557	7.793	27.9137
09/18/2019	16:37:00	41.6743	67.6791	7.6035	32.9495
09/18/2019	16:45:00	41.6976	67.7027	7.4722	30.228
09/18/2019	16:53:00	41.7212	67.7251	7.323	29.6571
09/18/2019	17:01:00	41.7439	67.7474	7.1303	28.812
09/18/2019	17:09:00	41.7679	67.7699	7.0236	30.1267
09/18/2019	17:17:00	41.7962	67.7917	7.1356	31.2617
09/18/2019	17:25:00	41.8239	67.813	7.2395	32.2975
09/18/2019	17:33:00	41.8466	67.8346	7.0483	29.3453
09/18/2019	17:41:00	41.8695	67.8551	7.0271	29.4993
09/18/2019	17:49:00	41.8921	67.8763	7.1145	28.85
09/18/2019	17:57:00	41.9134	67.897	7.1233	29.2861
09/18/2019	18:05:00	41.9312	67.9184	7.2104	30.2128
09/18/2019	18:13:00	41.9487	67.9386	7.1832	28.3801
09/18/2019	18:21:00	41.9651	67.959	7.2157	32.5678
09/18/2019	18:29:00	41.981	67.9793	7.3055	33.043
09/18/2019	18:37:00	41.9979	67.9998	7.4897	31.1465
09/18/2019	18:45:00	42.0148	68.0195	7.7154	29.0059
09/18/2019	18:53:00	42.0333	68.0395	8.1469	27.4506
09/18/2019	19:01:00	42.0542	68.0582	8.2024	29.763
09/18/2019	19:09:00	42.0765	68.0773	8.1582	28.4084
09/18/2019	19:17:00	42.0984	68.0957	7.5361	31.177
09/18/2019	19:25:00	42.1193	68.1127	7.6315	30.2297
09/18/2019	19:33:00	42.1379	68.1301	7.861	31.6976
09/18/2019	19:41:00	42.1559	68.1467	8.0029	29.6539
09/18/2019	19:49:00	42.1745	68.1642	8.0767	28.9684
09/18/2019	19:57:00	42.1934	68.1815	8.153	28.6353
09/18/2019	20:05:00	42.2129	68.1985	8.308	30.0014
09/18/2019	20:13:00	42.2332	68.2156	8.3928	27.9857
09/18/2019	20:21:00	42.2528	68.2323	8.5101	29.5773
09/18/2019	20:29:00	42.2665	68.2505	8.721	28.0073
09/18/2019	20:37:00	42.279	68.2685	8.83	30.4934
09/18/2019	20:45:00	42.2926	68.285	8.8378	29.15
09/18/2019	20:53:00	42.3075	68.3024	8.8558	29.7209
09/18/2019	21:01:00	42.3233	68.3194	8.8103	28.1048
09/18/2019	21:09:00	42.3397	68.3359	8.6092	28.9798
09/18/2019	21:17:00	42.3555	68.3519	8.4351	28.6604
09/18/2019	21:25:00	42.3711	68.3693	8.5523	28.922
09/18/2019	21:33:00	42.3864	68.3872	8.6178	28.114
09/18/2019	21:41:00	42.4048	68.4048	8.6574	26.97
09/18/2019	21:49:00	42.4239	68.4224	8.6591	25.828
09/18/2019	21:57:00	42.4427	68.439	8.6685	29.9568
09/18/2019	22:05:00	42.4642	68.4567	8.6565	27.0718
09/18/2019	22:13:00	42.4857	68.4744	8.684	27.9674
09/18/2019	22:21:00	42.5074	68.4921	8.7038	26.2091
09/18/2019	22:29:00	42.5279	68.5101	8.7416	26.9725
09/18/2019	22:37:00	42.5488	68.5277	8.7236	26.7899
09/18/2019	22:45:00	42.5688	68.5461	8.709	27.4123
09/18/2019	22:53:00	42.5884	68.565	8.5644	27.2038
09/18/2019	23:01:00	42.6079	68.5827	8.486	28.3016
09/18/2019	23:09:00	42.6277	68.6015	8.4074	27.5224
09/18/2019	23:17:00	42.6476	68.6202	8.3522	26.9039
09/18/2019	23:25:00	42.6666	68.6397	8.3409	27.6494
09/18/2019	23:33:00	42.6836	68.6592	8.6944	26.576
09/18/2019	23:41:00	42.7154	68.6755	8.6789	28.9976
09/18/2019	23:49:00	42.7681	68.6882	8.9021	26.6214
09/18/2019	23:57:00	42.8189	68.7009	8.7321	28.6293
09/19/2019	00:05:00	42.8698	68.7134	8.5472	28.0845
09/19/2019	00:13:00	42.9225	68.7254	8.5817	27.685
09/19/2019	00:21:00	42.9769	68.7374	8.5282	31.0512
09/19/2019	00:29:00	43.0318	68.7495	8.5549	27.9798
09/19/2019	00:37:00	43.0864	68.7613	8.5748	27.5251
09/19/2019	00:45:00	43.14	68.7735	8.5136	28.0104
09/19/2019	00:53:00	43.1918	68.7862	8.5386	26.9206
09/19/2019	01:01:00	43.2427	68.7989	8.6798	28.1209
09/19/2019	01:09:00	43.2939	68.8122	8.7717	29.6991
09/19/2019	01:17:00	43.3459	68.8253	8.8498	28.0628
09/19/2019	01:25:00	43.3976	68.8372	8.8583	29.1785
09/19/2019	01:33:00	43.4519	68.8499	8.8	29.5365
09/19/2019	01:41:00	43.5051	68.8627	8.7408	28.7251
09/19/2019	01:49:00	43.5613	68.8742	8.7751	26.4118
09/19/2019	01:57:00	43.6207	68.8843	8.8154	29.3145
09/19/2019	02:05:00	43.6786	68.8945	8.6961	28.6433
09/19/2019	02:13:00	43.736	68.9049	8.6969	27.5088
09/19/2019	02:21:00	43.7923	68.915	8.5894	27.314
09/19/2019	02:29:00	43.8495	68.9246	8.3928	27.6706
09/19/2019	02:37:00	43.9079	68.9341	8.5006	28.8935
09/19/2019	02:45:00	43.9681	68.9437	8.5282	27.3548
09/19/2019	02:53:00	44.0279	68.9533	8.5178	26.6033
09/19/2019	03:01:00	44.0876	68.9627	8.5066	28.7351
09/19/2019	03:09:00	44.1481	68.9723	8.5592	29.4609
09/19/2019	03:17:00	44.2089	68.9819	8.5282	28.9308
09/19/2019	03:25:00	44.2692	68.9914	8.4636	28.6613
09/19/2019	03:33:00	44.3285	69.0007	8.4204	29.6362
09/19/2019	03:41:00	44.3879	69.0095	8.4678	29.6762
09/19/2019	03:49:00	44.4483	69.0186	8.4704	28.2586
09/19/2019	03:57:00	44.5068	69.0288	8.4963	27.7487
09/19/2019	04:05:00	44.5655	69.0393	8.492	27.6437
09/19/2019	04:13:00	44.6235	69.0499	8.4005	28.8719
09/19/2019	04:21:00	44.6803	69.0602	8.3219	29.012
09/19/2019	04:29:00	44.7356	69.0704	8.4566	29.9309
09/19/2019	04:37:00	44.7922	69.0811	8.4627	28.4323
09/19/2019	04:45:00	44.85	69.091	8.366	30.0147
09/19/2019	04:53:00	44.9093	69.1001	8.3366	28.6762
09/19/2019	05:01:00	44.9686	69.1092	8.3029	29.8089
09/19/2019	05:09:00	45.0278	69.1184	8.397	28.4754
09/19/2019	05:17:00	45.0879	69.1278	8.5066	32.4897
09/19/2019	05:25:00	45.1477	69.1377	8.6221	32.5922
09/19/2019	05:33:00	45.2062	69.1473	8.8403	32.661
09/19/2019	05:41:00	45.2648	69.1569	8.4885	32.6793
09/19/2019	05:49:00	45.3249	69.1669	8.5334	32.6521
09/19/2019	05:57:00	45.3852	69.1765	8.4885	32.6449
09/19/2019	06:05:00	45.4451	69.1857	8.4393	31.9457
09/19/2019	06:13:00	45.5055	69.1954	8.4601	31.4343
09/19/2019	06:21:00	45.566	69.2055	8.1261	31.2837
09/19/2019	06:29:00	45.6267	69.216	8.1122	31.6222
09/19/2019	06:37:00	45.6875	69.2265	8.2501	33.2278
09/19/2019	06:45:00	45.7485	69.2369	8.0819	33.163
09/19/2019	06:53:00	45.8086	69.2471	7.9907	32.0151
09/19/2019	07:01:00	45.8702	69.2576	7.9263	32.3378
09/19/2019	07:09:00	45.9311	69.2681	7.82	33.104
09/19/2019	07:17:00	45.9925	69.2786	8.0298	32.3307
09/19/2019	07:25:00	46.0542	69.2891	8.1617	31.0644
09/19/2019	07:33:00	46.1166	69.2998	7.9011	32.7603
09/19/2019	07:41:00	46.1793	69.3105	7.4494	32.0829
09/19/2019	07:49:00	46.2413	69.3212	7.5519	31.2913
09/19/2019	07:57:00	46.3034	69.3318	7.5948	33.1031
09/19/2019	08:05:00	46.366	69.3424	7.6595	31.0407
09/19/2019	08:13:00	46.4287	69.3529	7.5457	33.0839
09/19/2019	08:21:00	46.4906	69.3632	7.572	31.8036
09/19/2019	08:29:00	46.5528	69.3735	7.495	33.0641
09/19/2019	08:37:00	46.6157	69.3839	7.4327	29.5543
09/19/2019	08:45:00	46.6797	69.3945	7.4459	31.3667
09/19/2019	08:53:00	46.742	69.4055	7.4468	31.5255
09/19/2019	09:01:00	46.8038	69.417	7.4222	32.1705
09/19/2019	09:09:00	46.8656	69.4283	7.2896	33.0719
09/19/2019	09:17:00	46.9285	69.4392	7.4459	33.0517
09/19/2019	09:25:00	46.9915	69.4498	7.7887	33.0468
09/19/2019	09:33:00	47.0555	69.46	7.9733	33.0781
09/19/2019	09:41:00	47.1194	69.4699	8.199	33.011
09/19/2019	09:49:00	47.1845	69.4799	8.2007	33.053
09/19/2019	09:57:00	47.2493	69.4898	7.955	33.0212
09/19/2019	10:05:00	47.313	69.4993	7.8305	33.0049
09/19/2019	10:13:00	47.3761	69.5087	7.8775	32.9706
09/19/2019	10:21:00	47.4413	69.5184	7.7372	32.9848
09/19/2019	10:29:00	47.5028	69.5273	7.6595	32.6112
09/19/2019	10:37:00	47.5358	69.5316	7.6096	32.8234
09/19/2019	10:45:00	47.5518	69.5328	7.6866	32.7362
09/19/2019	10:53:00	47.5653	69.5341	7.6761	32.7302
09/19/2019	11:01:00	47.5787	69.5355	7.7128	31.7292
09/19/2019	11:09:00	47.5918	69.5367	7.7965	32.6905
09/19/2019	11:17:00	47.6052	69.5378	7.841	32.6736
09/19/2019	11:25:00	47.632	69.5439	7.8958	32.6538
09/19/2019	11:33:00	47.6615	69.5496	7.935	31.6249
09/19/2019	11:41:00	47.6935	69.5558	8.0063	32.6079
09/19/2019	11:49:00	47.7488	69.5666	8.0437	32.5922
09/19/2019	11:57:00	47.808	69.5777	8.0046	31.4214
09/19/2019	12:05:00	47.8679	69.5887	7.9654	32.5944
09/19/2019	12:13:00	47.929	69.5991	7.9368	32.6358
09/19/2019	12:21:00	47.9913	69.6092	7.8985	32.621
09/19/2019	12:45:00	48.181	69.6397	7.9846	32.6248
09/19/2019	12:53:00	48.2444	69.6503	8.0124	32.6561
09/19/2019	13:01:00	48.3072	69.6612	8.0463	32.6716
09/19/2019	13:09:00	48.3692	69.672	8.0341	32.6986
09/19/2019	13:17:00	48.4331	69.6817	8.0272	32.6378
09/19/2019	13:25:00	48.4971	69.6913	8.0706	31.5895
09/19/2019	13:33:00	48.5608	69.7011	7.8697	32.7864
09/19/2019	13:41:00	48.6247	69.711	7.841	32.7626
09/19/2019	13:49:00	48.6884	69.7205	7.9498	32.7955
09/19/2019	13:57:00	48.7573	69.7253	8.0229	31.8046
09/19/2019	14:05:00	48.8268	69.7294	7.9167	32.8446
09/19/2019	14:13:00	48.8962	69.7335	7.8897	32.8261
09/19/2019	14:21:00	48.9649	69.7376	7.9211	32.7989
09/19/2019	14:29:00	49.0338	69.7417	7.9629	32.7698
09/19/2019	14:37:00	49.1026	69.7455	8.1556	32.7642
09/19/2019	14:45:00	49.1714	69.7489	8.1149	32.7912
09/19/2019	14:53:00	49.2418	69.7522	8.0845	32.8118
09/19/2019	15:01:00	49.3122	69.7559	8.1122	32.7869
09/19/2019	15:09:00	49.3817	69.7593	8.0975	32.8186
09/19/2019	15:17:00	49.4514	69.7628	7.6831	33.0417
09/19/2019	15:25:00	49.5205	69.7663	7.6691	31.8501
09/19/2019	15:33:00	49.5895	69.7704	7.6359	33.0379
09/19/2019	15:41:00	49.6603	69.7747	7.6437	31.9716
09/19/2019	15:49:00	49.7315	69.7795	8.0784	32.8724
09/19/2019	15:57:00	49.8012	69.7838	8.0376	32.8468
09/19/2019	16:05:00	49.8725	69.7872	7.6009	33.0825
09/19/2019	16:13:00	49.9442	69.7902	7.5878	33.0519
09/19/2019	16:21:00	50.0159	69.7935	7.4327	33.1703
09/19/2019	16:29:00	50.086	69.7972	7.5002	32.1515
09/19/2019	16:37:00	50.1546	69.801	7.7782	33.0296
09/19/2019	16:45:00	50.2232	69.8046	7.551	33.0687
09/19/2019	16:53:00	50.2914	69.8084	7.4766	33.305
09/19/2019	17:01:00	50.3281	69.8106	7.7738	33.3063
09/19/2019	17:09:00	50.3447	69.8115	7.861	33.3383
09/19/2019	17:17:00	50.3607	69.8122	7.868	33.335
09/19/2019	17:25:00	50.376	69.8129	7.8296	33.2767
09/19/2019	17:33:00	50.3914	69.8135	7.8383	33.3068
09/19/2019	17:41:00	50.4071	69.8141	7.752	33.2853
09/19/2019	17:49:00	50.4358	69.8153	7.6149	33.2259
09/19/2019	17:57:00	50.5027	69.8187	7.6787	33.199
09/19/2019	18:05:00	50.5724	69.8225	7.6874	31.9652
09/19/2019	18:13:00	50.6425	69.8264	7.8576	32.2407
09/19/2019	18:21:00	50.7128	69.8304	7.915	33.1131
09/19/2019	18:29:00	50.7834	69.8342	7.9733	33.1738
09/19/2019	18:37:00	50.852	69.8378	7.8845	32.5969
09/19/2019	18:45:00	50.9217	69.8414	7.8052	33.2164
09/19/2019	18:53:00	50.9916	69.845	7.7957	33.2176
09/19/2019	19:01:00	51.0622	69.8486	7.7477	33.2317
09/19/2019	19:09:00	51.1323	69.8521	7.7485	33.1901
09/19/2019	19:17:00	51.2025	69.8556	7.6691	33.3386
09/19/2019	19:25:00	51.2733	69.8592	7.6822	33.3238
09/19/2019	19:33:00	51.3449	69.8628	7.807	33.3707
09/19/2019	19:41:00	51.4102	69.866	7.7678	33.3653
09/19/2019	19:49:00	51.4583	69.8697	7.7695	33.2957
09/19/2019	19:57:00	51.4947	69.8813	7.8235	33.3131
09/19/2019	20:05:00	51.5514	69.8874	7.9907	33.1303
09/19/2019	20:13:00	51.623	69.8909	8.015	33.0477
09/19/2019	20:21:00	51.6957	69.8943	8.0063	33.1391
09/19/2019	20:29:00	51.7688	69.8973	7.9637	33.2662
09/19/2019	20:37:00	51.8414	69.9005	7.9959	33.2221
09/19/2019	20:45:00	51.9132	69.9026	7.9333	33.2715
09/19/2019	20:53:00	51.9854	69.9049	7.7084	33.2272
09/19/2019	21:01:00	52.0576	69.907	7.6315	33.2009
09/19/2019	21:09:00	52.1291	69.9095	7.9011	33.0633
09/19/2019	21:17:00	52.2012	69.9117	7.8576	33.1327
09/19/2019	21:25:00	52.273	69.9149	7.8444	33.0763
09/19/2019	21:33:00	52.3459	69.9183	7.7512	33.1084
09/19/2019	21:41:00	52.4184	69.9215	7.6848	33.1217
09/19/2019	21:49:00	52.4896	69.9251	7.7433	33.1023
09/19/2019	21:57:00	52.5601	69.9292	7.7843	33.0769
09/19/2019	22:05:00	52.6303	69.9334	7.7616	33.0611
09/19/2019	22:13:00	52.7006	69.9376	7.7625	33.0399
09/19/2019	22:21:00	52.7722	69.9416	7.7407	33.0923
09/19/2019	22:29:00	52.8435	69.9454	7.8096	33.0778
09/19/2019	22:37:00	52.9153	69.9489	7.8279	33.144
09/19/2019	22:45:00	52.9868	69.9523	7.8131	33.1863
09/19/2019	22:53:00	53.0594	69.956	7.7564	33.2335
09/19/2019	23:01:00	53.1319	69.9597	7.814	33.2566
09/19/2019	23:09:00	53.2046	69.9633	7.7101	33.3061
09/19/2019	23:17:00	53.2776	69.9668	7.6647	33.3031
09/19/2019	23:25:00	53.3497	69.9704	7.243	33.1154
09/19/2019	23:33:00	53.4219	69.974	7.5843	32.9371
09/19/2019	23:41:00	53.4937	69.9781	7.7154	32.9953
09/19/2019	23:49:00	53.5672	69.9823	7.5361	33.1204
09/19/2019	23:57:00	53.6403	69.9867	7.572	33.0021
09/20/2019	00:05:00	53.7145	69.9913	7.3994	33.1565
09/20/2019	00:13:00	53.788	69.996	7.7032	32.991
09/20/2019	00:21:00	53.8611	70.0002	7.7808	32.7335
09/20/2019	00:29:00	53.9349	70.0048	7.5528	32.9761
09/20/2019	00:37:00	54.0089	70.0093	7.8	31.8913
09/20/2019	00:45:00	54.0834	70.014	7.8009	32.7958
09/20/2019	00:53:00	54.1569	70.0186	7.7293	32.8599
09/20/2019	01:01:00	54.2318	70.0234	7.7319	32.9694
09/20/2019	01:09:00	54.3058	70.0283	7.6796	33.0621
09/20/2019	01:17:00	54.3798	70.0333	7.7982	32.9914
09/20/2019	01:25:00	54.4536	70.0383	7.9428	32.738
09/20/2019	01:33:00	54.5279	70.043	7.9932	31.7332
09/20/2019	01:41:00	54.6022	70.0475	8.0654	32.4891
09/20/2019	01:49:00	54.6766	70.0521	8.0532	31.8719
09/20/2019	01:57:00	54.7519	70.0566	7.8218	32.7266
09/20/2019	02:05:00	54.8263	70.061	7.902	31.7613
09/20/2019	02:13:00	54.9016	70.0645	7.8958	32.6876
09/20/2019	02:21:00	54.9776	70.0673	7.9281	32.6867
09/20/2019	02:29:00	55.0538	70.0702	7.9541	32.6735
09/20/2019	02:37:00	55.129	70.0732	7.9376	32.6485
09/20/2019	02:45:00	55.2031	70.0764	7.995	31.6746
09/20/2019	02:53:00	55.2781	70.0799	8.0245	32.0233
09/20/2019	03:01:00	55.3524	70.0836	8.0584	32.0537
09/20/2019	03:09:00	55.4279	70.0875	8.1322	32.0967
09/20/2019	03:17:00	55.5018	70.091	8.2422	32.0863
09/20/2019	03:25:00	55.5748	70.0946	8.2354	32.0147
09/20/2019	03:33:00	55.6495	70.099	7.9829	30.9859
09/20/2019	03:41:00	55.7226	70.1037	8.1122	31.6667
09/20/2019	03:49:00	55.7946	70.1083	8.2145	31.6212
09/20/2019	03:57:00	55.8666	70.1128	8.199	31.5996
09/20/2019	04:05:00	55.9389	70.1174	8.2163	31.553
09/20/2019	04:13:00	56.011	70.122	8.1157	31.5778
09/20/2019	04:21:00	56.0833	70.1262	8.101	30.1268
09/20/2019	04:29:00	56.1555	70.13	8.0132	31.5743
09/20/2019	04:37:00	56.2269	70.1337	8.0219	31.5051
09/20/2019	04:45:00	56.2982	70.137	8.028	31.5488
09/20/2019	04:53:00	56.37	70.1398	8.0324	31.6296
09/20/2019	05:01:00	56.4416	70.1427	8.0202	31.5859
09/20/2019	05:09:00	56.5135	70.1456	8.114	31.6607
09/20/2019	05:17:00	56.5867	70.1484	8.0854	30.6877
09/20/2019	05:25:00	56.6598	70.1512	7.9568	31.801
09/20/2019	05:33:00	56.7324	70.1544	7.8418	31.9081
09/20/2019	05:41:00	56.8027	70.1585	7.9776	31.9118
09/20/2019	05:49:00	56.8733	70.1628	8.0002	32.0299
09/20/2019	05:57:00	56.9438	70.1672	7.8671	32.0263
09/20/2019	06:05:00	57.0143	70.1714	7.7965	31.9563
09/20/2019	06:13:00	57.0842	70.1755	7.7424	31.9654
09/20/2019	06:21:00	57.1538	70.1797	7.8566	31.9361
09/20/2019	06:29:00	57.2239	70.1846	7.5834	31.87
09/20/2019	06:37:00	57.294	70.1891	7.8122	31.8026
09/20/2019	06:45:00	57.3618	70.1958	7.8576	31.8993
09/20/2019	06:53:00	57.4301	70.2028	8.0315	31.8157
09/20/2019	07:01:00	57.4984	70.2098	8.2474	31.8936
09/20/2019	07:09:00	57.5672	70.2168	8.3409	31.8644
09/20/2019	07:17:00	57.6377	70.224	8.2518	31.8575
09/20/2019	07:25:00	57.7084	70.2315	8.5739	31.7955
09/20/2019	07:33:00	57.7674	70.2378	8.3357	31.9356
09/20/2019	07:41:00	57.8145	70.2432	8.2838	31.8007
09/20/2019	07:49:00	57.8723	70.2494	8.5523	31.7399
09/20/2019	07:57:00	57.9256	70.2563	9.0604	31.8342
09/20/2019	08:05:00	57.95	70.2605	8.8095	31.4618
09/20/2019	08:13:00	57.9765	70.2639	8.7244	31.2733
09/20/2019	08:21:00	58.0069	70.2661	8.8618	31.1393
09/20/2019	08:29:00	58.0384	70.2686	8.8472	30.3155
09/20/2019	08:37:00	58.066	70.2735	8.5954	28.6055
09/20/2019	08:45:00	58.068	70.2857	7.8958	26.2152
09/20/2019	08:53:00	58.0708	70.2972	7.8514	26.066
09/20/2019	09:01:00	58.0752	70.3088	7.827	26.1279
09/20/2019	09:09:00	58.08	70.3204	7.8244	26.422
09/20/2019	09:17:00	58.0846	70.332	7.8175	26.6025
09/20/2019	09:25:00	58.0895	70.3434	7.8	26.3572
09/20/2019	09:33:00	58.0907	70.3539	7.7547	26.2731
09/20/2019	09:41:00	58.0905	70.3646	7.7791	26.2284
09/20/2019	09:49:00	58.0927	70.376	7.9028	28.4585
09/20/2019	09:57:00	58.0941	70.387	8.0272	30.0728
09/20/2019	10:05:00	58.111	70.3974	7.9602	30.3192
09/20/2019	10:13:00	58.1325	70.4068	7.7773	27.7343
09/20/2019	10:21:00	58.1538	70.4151	7.9559	28.3195
09/20/2019	10:29:00	58.1763	70.4237	8.0567	30.3267
09/20/2019	10:37:00	58.195	70.432	7.7947	27.7149
09/20/2019	10:45:00	58.2143	70.4418	7.8592	28.336
09/20/2019	10:53:00	58.2374	70.452	7.8017	27.6994
09/20/2019	11:01:00	58.2593	70.4616	7.8488	27.8658
09/20/2019	11:09:00	58.2812	70.4717	7.9045	27.4061
09/20/2019	11:17:00	58.3025	70.4813	7.9472	28.9199
09/20/2019	11:25:00	58.3218	70.4899	7.9594	29.5047
09/20/2019	11:33:00	58.3398	70.4958	7.9315	29.6467
09/20/2019	11:41:00	58.3555	70.5006	7.9298	29.7037
09/20/2019	11:49:00	58.3707	70.5054	7.9167	30.169
09/20/2019	11:57:00	58.3842	70.5105	7.9759	30.2679
09/20/2019	12:05:00	58.391	70.5142	7.9863	30.2366
09/20/2019	12:13:00	58.3957	70.5188	8.008	30.3134
09/20/2019	12:21:00	58.399	70.5237	8.0758	30.6173
09/20/2019	12:29:00	58.4033	70.5291	8.1166	31.0499
09/20/2019	12:37:00	58.4131	70.5337	8.0957	31.0262
09/20/2019	12:45:00	58.4213	70.5354	8.0575	31.0544
09/20/2019	12:53:00	58.4294	70.5376	8.0394	31.0817
[truncated: 9,810 more rows]
